# Supplementary material
Source: publisher figshare collection journal article supplement (https://acs.figshare.com/ndownloader/files/3803224)
Supplement: Supplementary file 1 [file 3803224]

 
data_2_sq
 
_audit_creation_method            'SHELXL-2014/7'
_shelx_SHELXL_version_number      '2014/7'
_chemical_name_systematic         ?
_chemical_name_common             ?
_chemical_melting_point           ?
_chemical_formula_moiety          ?
_chemical_formula_sum
 'C256 H336 Ag16' 
_chemical_formula_weight          5139.15

loop_
 _atom_type_symbol
 _atom_type_description
 _atom_type_scat_dispersion_real
 _atom_type_scat_dispersion_imag
 _atom_type_scat_source
 'C'  'C'   0.0033   0.0016
 'International Tables Vol C Tables 4.2.6.8 and 6.1.1.4'
 'H'  'H'   0.0000   0.0000
 'International Tables Vol C Tables 4.2.6.8 and 6.1.1.4'
 'Ag'  'Ag'  -0.8971   1.1015
 'International Tables Vol C Tables 4.2.6.8 and 6.1.1.4'
 
_space_group_crystal_system       tetragonal
_space_group_IT_number            82
_space_group_name_H-M_alt         'I -4'
_space_group_name_Hall            'I -4'
 
_shelx_space_group_comment
;
The symmetry employed for this shelxl refinement is uniquely defined
by the following loop, which should always be used as a source of
symmetry information in preference to the above space-group names.
They are only intended as comments.
;
 
loop_
 _space_group_symop_operation_xyz
 'x, y, z'
 'y, -x, -z'
 '-x, -y, z'
 '-y, x, -z'
 'x+1/2, y+1/2, z+1/2'
 'y+1/2, -x+1/2, -z+1/2'
 '-x+1/2, -y+1/2, z+1/2'
 '-y+1/2, x+1/2, -z+1/2'
 
_cell_length_a                    25.8070(9)
_cell_length_b                    25.8070(9)
_cell_length_c                    20.5657(10)
_cell_angle_alpha                 90
_cell_angle_beta                  90
_cell_angle_gamma                 90
_cell_volume                      13696.8(12)
_cell_formula_units_Z             2
_cell_measurement_temperature     150(2)
_cell_measurement_reflns_used     9637 
_cell_measurement_theta_min       2.27 
_cell_measurement_theta_max       24.17 
 
_exptl_crystal_description        block 
_exptl_crystal_colour             yellow 
_exptl_crystal_density_meas       ?
_exptl_crystal_density_method     ?
_exptl_crystal_density_diffrn     1.246          
_exptl_crystal_F_000              5248
_exptl_transmission_factor_min    ?
_exptl_transmission_factor_max    ?
_exptl_crystal_size_max           0.250
_exptl_crystal_size_mid           0.240
_exptl_crystal_size_min           0.220
_exptl_absorpt_coefficient_mu     1.158
_shelx_estimated_absorpt_T_min    0.761
_shelx_estimated_absorpt_T_max    0.785
_exptl_absorpt_correction_type    multi-scan
_exptl_absorpt_correction_T_min   0.7606 
_exptl_absorpt_correction_T_max   0.7847 
_exptl_absorpt_process_details    SADABS 
_exptl_absorpt_special_details    ?
_diffrn_ambient_temperature       150(2)
_diffrn_radiation_wavelength      0.71073
_diffrn_radiation_type            MoK\a
_diffrn_source                    'fine-focus sealed tube'
_diffrn_measurement_device_type    'CCD area detector' 
_diffrn_measurement_method         'phi and omega scans'
_diffrn_detector_area_resol_mean  ?
_diffrn_reflns_number             158423
_diffrn_reflns_av_unetI/netI      0.0303
_diffrn_reflns_av_R_equivalents   0.0650
_diffrn_reflns_limit_h_min        -32
_diffrn_reflns_limit_h_max        32
_diffrn_reflns_limit_k_min        -32
_diffrn_reflns_limit_k_max        32
_diffrn_reflns_limit_l_min        -25
_diffrn_reflns_limit_l_max        25
_diffrn_reflns_theta_min          2.232
_diffrn_reflns_theta_max          26.465
_diffrn_reflns_theta_full         25.242
_diffrn_measured_fraction_theta_max   0.997
_diffrn_measured_fraction_theta_full  0.999
_diffrn_reflns_Laue_measured_fraction_max    0.997
_diffrn_reflns_Laue_measured_fraction_full   0.999
_diffrn_reflns_point_group_measured_fraction_max   0.997
_diffrn_reflns_point_group_measured_fraction_full  0.999
_reflns_number_total              14097
_reflns_number_gt                 10690
_reflns_threshold_expression      'I > 2\s(I)'
_reflns_Friedel_coverage          0.941
_reflns_Friedel_fraction_max      0.997
_reflns_Friedel_fraction_full     1.000
 
_reflns_special_details
;
 Reflections were merged by SHELXL according to the crystal
 class for the calculation of statistics and refinement.
 
 Structure factors included contributions from the .fab file.
 
 _reflns_Friedel_fraction is defined as the number of unique
 Friedel pairs measured divided by the number that would be
 possible theoretically, ignoring centric projections and
 systematic absences.
;
 
_computing_data_collection        'Bruker SMART' 
_computing_cell_refinement        'Bruker SMART' 
_computing_data_reduction         'Bruker SAINT' 
_computing_structure_solution     'SHELXS-97 (Sheldrick, 1990)' 
_computing_structure_refinement 'SHELXL-2014/7 (Sheldrick, 2014)'
_computing_molecular_graphics     'Bruker SHELXTL' 
_computing_publication_material   'Bruker SHELXTL' 
_refine_special_details           ?
_refine_ls_structure_factor_coef  Fsqd
_refine_ls_matrix_type            full
_refine_ls_weighting_scheme       calc
_refine_ls_weighting_details
'w=1/[\s^2^(Fo^2^)+(0.1414P)^2^+23.3794P] where P=(Fo^2^+2Fc^2^)/3'
_atom_sites_solution_primary      direct
_atom_sites_solution_secondary    difmap
_atom_sites_solution_hydrogens    geom
_refine_ls_hydrogen_treatment     constr
_refine_ls_extinction_method      none
_refine_ls_extinction_coef        .
_refine_ls_abs_structure_details
;
 Flack x determined using 4376 quotients [(I+)-(I-)]/[(I+)+(I-)]
 (Parsons, Flack and Wagner, Acta Cryst. B69 (2013) 249-259).
;
_refine_ls_abs_structure_Flack    0.105(8)
_chemical_absolute_configuration  ?
_refine_ls_number_reflns          14097
_refine_ls_number_parameters      651
_refine_ls_number_restraints      179
_refine_ls_R_factor_all           0.0912
_refine_ls_R_factor_gt            0.0681
_refine_ls_wR_factor_ref          0.2105
_refine_ls_wR_factor_gt           0.1889
_refine_ls_goodness_of_fit_ref    1.041
_refine_ls_restrained_S_all       1.049
_refine_ls_shift/su_max           0.085
_refine_ls_shift/su_mean          0.004
 
loop_
 _atom_site_label
 _atom_site_type_symbol
 _atom_site_fract_x
 _atom_site_fract_y
 _atom_site_fract_z
 _atom_site_U_iso_or_equiv
 _atom_site_adp_type
 _atom_site_occupancy
 _atom_site_site_symmetry_order  
 _atom_site_calc_flag
 _atom_site_refinement_flags_posn
 _atom_site_refinement_flags_adp
 _atom_site_refinement_flags_occupancy
 _atom_site_disorder_assembly
 _atom_site_disorder_group
Ag1 Ag 1.0000 1.0000 1.06746(8) 0.0655(4) Uani 1 2 d S T P . .
Ag2 Ag 0.96532(4) 0.88910(4) 1.03102(6) 0.0722(3) Uani 1 1 d . . . . .
Ag3 Ag 1.04978(4) 0.86940(3) 0.93527(5) 0.0611(3) Uani 1 1 d . . . . .
Ag4 Ag 0.98919(7) 0.92481(5) 0.83464(6) 0.0951(4) Uani 1 1 d . . . . .
Ag5 Ag 1.0000 1.0000 0.72725(7) 0.0753(4) Uani 1 2 d S T P . .
C1 C 1.0927(6) 0.9176(5) 0.8814(7) 0.066(3) Uani 1 1 d . . . . .
C2 C 1.1087(6) 0.9302(6) 0.8291(9) 0.076(4) Uani 1 1 d . . . . .
C3 C 1.1267(6) 0.9430(5) 0.7651(7) 0.066(3) Uani 1 1 d . . . . .
C4 C 1.1326(6) 0.9008(7) 0.7180(9) 0.085(4) Uani 1 1 d . . . . .
H4 H 1.1284 0.8660 0.7320 0.102 Uiso 1 1 calc R U . . .
C5 C 1.1437(7) 0.9104(7) 0.6562(8) 0.088(5) Uani 1 1 d . . . . .
C6 C 1.1572(7) 0.9622(6) 0.6395(8) 0.081(4) Uani 1 1 d . . . . .
H6 H 1.1669 0.9687 0.5957 0.097 Uiso 1 1 calc R U . . .
C7 C 1.1575(7) 1.0052(6) 0.6833(8) 0.082(4) Uani 1 1 d . U . . .
C8 C 1.1434(6) 0.9960(7) 0.7495(7) 0.078(4) Uani 1 1 d . . . . .
H8 H 1.1447 1.0226 0.7815 0.094 Uiso 1 1 calc R U . . .
C9 C 1.1526(7) 0.8682(6) 0.6115(9) 0.098(5) Uani 1 1 d D U . . .
C10 C 1.1280(12) 0.8144(10) 0.6292(18) 0.157(10) Uani 1 1 d D U . . .
H10A H 1.1367 0.7890 0.5955 0.235 Uiso 1 1 calc R U . . .
H10B H 1.1417 0.8026 0.6712 0.235 Uiso 1 1 calc R U . . .
H10C H 1.0903 0.8179 0.6322 0.235 Uiso 1 1 calc R U . . .
C11 C 1.1255(15) 0.8789(16) 0.5454(13) 0.206(17) Uani 1 1 d D U . . .
H11A H 1.1320 0.8499 0.5157 0.310 Uiso 1 1 calc R U . . .
H11B H 1.0881 0.8826 0.5524 0.310 Uiso 1 1 calc R U . . .
H11C H 1.1393 0.9109 0.5265 0.310 Uiso 1 1 calc R U . . .
C12 C 1.2120(9) 0.8580(11) 0.5964(17) 0.158(12) Uani 1 1 d D U . . .
H12A H 1.2152 0.8290 0.5659 0.237 Uiso 1 1 calc R U . . .
H12B H 1.2273 0.8892 0.5770 0.237 Uiso 1 1 calc R U . . .
H12C H 1.2302 0.8496 0.6368 0.237 Uiso 1 1 calc R U . . .
C13 C 1.1668(8) 1.0632(8) 0.6624(10) 0.098(5) Uani 1 1 d . U . . .
C14 C 1.1586(11) 1.1035(9) 0.7105(11) 0.125(9) Uani 1 1 d . . . . .
H14B H 1.1658 1.1374 0.6910 0.187 Uiso 1 1 calc R U . . .
H14A H 1.1226 1.1024 0.7256 0.187 Uiso 1 1 calc R U . . .
H14C H 1.1820 1.0979 0.7474 0.187 Uiso 1 1 calc R U . . .
C15 C 1.2226(10) 1.0636(10) 0.6284(13) 0.121(7) Uani 1 1 d . U . . .
H15B H 1.2247 1.0353 0.5969 0.182 Uiso 1 1 calc R U . . .
H15A H 1.2279 1.0968 0.6061 0.182 Uiso 1 1 calc R U . . .
H15C H 1.2495 1.0591 0.6616 0.182 Uiso 1 1 calc R U . . .
C16 C 1.1230(12) 1.0712(8) 0.6092(10) 0.120(8) Uani 1 1 d . . . . .
H16C H 1.1266 1.0449 0.5752 0.180 Uiso 1 1 calc R U . . .
H16A H 1.0888 1.0680 0.6297 0.180 Uiso 1 1 calc R U . . .
H16B H 1.1264 1.1058 0.5899 0.180 Uiso 1 1 calc R U . . .
C17 C 0.9928(6) 0.9220(6) 0.7272(7) 0.073(4) Uani 1 1 d . . . . .
C18 C 0.9933(6) 0.8730(6) 0.7266(7) 0.071(3) Uani 1 1 d . . . . .
C19 C 0.9951(5) 0.8178(6) 0.7177(7) 0.069(3) Uani 1 1 d . . . . .
C20 C 1.0203(6) 0.7868(6) 0.7582(8) 0.072(4) Uani 1 1 d . . . . .
H20 H 1.0370 0.8024 0.7944 0.087 Uiso 1 1 calc R U . . .
C21 C 1.0244(6) 0.7305(7) 0.7520(8) 0.081(4) Uani 1 1 d . . . . .
C22 C 0.9993(5) 0.7123(6) 0.6967(9) 0.082(5) Uani 1 1 d . . . . .
H22 H 1.0011 0.6761 0.6885 0.098 Uiso 1 1 calc R U . . .
C23 C 0.9719(5) 0.7420(6) 0.6528(7) 0.069(3) Uani 1 1 d . . . . .
C24 C 0.9696(5) 0.7961(5) 0.6631(7) 0.064(3) Uani 1 1 d . . . . .
H24 H 0.9512 0.8178 0.6337 0.077 Uiso 1 1 calc R U . . .
C25 C 1.0542(7) 0.6976(7) 0.7918(10) 0.102(5) Uani 1 1 d D U . . .
C26 C 1.0863(15) 0.7286(15) 0.8379(19) 0.200(13) Uani 1 1 d D U . . .
H26A H 1.1068 0.7052 0.8652 0.300 Uiso 1 1 calc R U . . .
H26B H 1.1097 0.7512 0.8132 0.300 Uiso 1 1 calc R U . . .
H26C H 1.0637 0.7497 0.8654 0.300 Uiso 1 1 calc R U . . .
C27 C 1.0823(12) 0.6544(12) 0.7511(16) 0.162(10) Uani 1 1 d D U . . .
H27A H 1.1025 0.6323 0.7804 0.242 Uiso 1 1 calc R U . . .
H27B H 1.0564 0.6333 0.7284 0.242 Uiso 1 1 calc R U . . .
H27C H 1.1054 0.6706 0.7193 0.242 Uiso 1 1 calc R U . . .
C28 C 1.0186(11) 0.6639(12) 0.8341(15) 0.152(9) Uani 1 1 d D U . . .
H28A H 1.0397 0.6412 0.8615 0.229 Uiso 1 1 calc R U . . .
H28B H 0.9970 0.6862 0.8616 0.229 Uiso 1 1 calc R U . . .
H28C H 0.9962 0.6428 0.8060 0.229 Uiso 1 1 calc R U . . .
C29 C 0.9443(6) 0.7181(6) 0.5935(8) 0.081(4) Uani 1 1 d . . . . .
C30 C 0.8893(7) 0.7365(9) 0.5887(9) 0.096(5) Uani 1 1 d . . . . .
H30A H 0.8886 0.7745 0.5892 0.144 Uiso 1 1 calc R U . . .
H30B H 0.8739 0.7240 0.5480 0.144 Uiso 1 1 calc R U . . .
H30C H 0.8693 0.7232 0.6256 0.144 Uiso 1 1 calc R U . . .
C31 C 0.9759(10) 0.7361(9) 0.5328(9) 0.116(7) Uani 1 1 d . . . . .
H31A H 1.0117 0.7238 0.5365 0.175 Uiso 1 1 calc R U . . .
H31C H 0.9602 0.7217 0.4933 0.175 Uiso 1 1 calc R U . . .
H31B H 0.9756 0.7740 0.5303 0.175 Uiso 1 1 calc R U . . .
C32 C 0.9463(10) 0.6593(8) 0.5928(11) 0.110(6) Uani 1 1 d . . . . .
H32B H 0.9824 0.6479 0.5960 0.165 Uiso 1 1 calc R U . . .
H32C H 0.9266 0.6457 0.6298 0.165 Uiso 1 1 calc R U . . .
H32A H 0.9312 0.6465 0.5522 0.165 Uiso 1 1 calc R U . . .
C33 C 0.9395(5) 0.9474(4) 0.9263(7) 0.060(3) Uani 1 1 d . . . . .
C34 C 0.9044(4) 0.9188(4) 0.9118(6) 0.055(3) Uani 1 1 d . . . . .
C35 C 0.8622(4) 0.8847(4) 0.8991(6) 0.053(2) Uani 1 1 d . . . . .
C36 C 0.8112(5) 0.9013(6) 0.9069(8) 0.074(4) Uani 1 1 d . . . . .
H36 H 0.8051 0.9346 0.9249 0.088 Uiso 1 1 calc R U . . .
C37 C 0.7694(5) 0.8712(7) 0.8896(10) 0.084(4) Uani 1 1 d D . . . .
C38 C 0.7817(6) 0.8191(7) 0.8687(9) 0.086(5) Uani 1 1 d . . . . .
H38 H 0.7537 0.7961 0.8602 0.103 Uiso 1 1 calc R U . . .
C39 C 0.8290(6) 0.8013(6) 0.8608(6) 0.067(3) Uani 1 1 d . . . . .
C40 C 0.8714(5) 0.8336(5) 0.8750(5) 0.055(3) Uani 1 1 d . . . . .
H40 H 0.9058 0.8217 0.8685 0.066 Uiso 1 1 calc R U . . .
C41 C 0.7102(11) 0.8804(18) 0.889(2) 0.15(2) Uani 0.55(3) 1 d D U P A 1
C65 C 0.705(3) 0.9350(19) 0.916(3) 0.17(2) Uani 0.55(3) 1 d D U P A 1
H65A H 0.7179 0.9361 0.9605 0.252 Uiso 0.55(3) 1 calc R U P A 1
H65B H 0.7255 0.9587 0.8887 0.252 Uiso 0.55(3) 1 calc R U P A 1
H65C H 0.6686 0.9455 0.9148 0.252 Uiso 0.55(3) 1 calc R U P A 1
C66 C 0.692(2) 0.872(2) 0.820(2) 0.135(17) Uani 0.55(3) 1 d D U P A 1
H66A H 0.6971 0.8353 0.8085 0.202 Uiso 0.55(3) 1 calc R U P A 1
H66B H 0.6552 0.8805 0.8168 0.202 Uiso 0.55(3) 1 calc R U P A 1
H66C H 0.7121 0.8937 0.7907 0.202 Uiso 0.55(3) 1 calc R U P A 1
C67 C 0.683(2) 0.842(2) 0.935(3) 0.17(2) Uani 0.55(3) 1 d D U P A 1
H67A H 0.6865 0.8071 0.9180 0.257 Uiso 0.55(3) 1 calc R U P A 1
H67B H 0.6991 0.8442 0.9784 0.257 Uiso 0.55(3) 1 calc R U P A 1
H67C H 0.6463 0.8514 0.9386 0.257 Uiso 0.55(3) 1 calc R U P A 1
C41A C 0.7143(9) 0.8924(11) 0.9079(15) 0.079(11) Uani 0.45(3) 1 d D U P A 2
C65A C 0.6730(12) 0.8535(15) 0.886(3) 0.107(16) Uani 0.45(3) 1 d D U P A 2
H65D H 0.6785 0.8451 0.8397 0.160 Uiso 0.45(3) 1 calc R U P A 2
H65E H 0.6757 0.8219 0.9118 0.160 Uiso 0.45(3) 1 calc R U P A 2
H65F H 0.6385 0.8688 0.8912 0.160 Uiso 0.45(3) 1 calc R U P A 2
C66A C 0.7054(13) 0.9055(14) 0.9802(15) 0.083(10) Uani 0.45(3) 1 d D U P A 2
H66D H 0.7317 0.9304 0.9947 0.125 Uiso 0.45(3) 1 calc R U P A 2
H66E H 0.6709 0.9207 0.9857 0.125 Uiso 0.45(3) 1 calc R U P A 2
H66F H 0.7080 0.8738 1.0062 0.125 Uiso 0.45(3) 1 calc R U P A 2
C67A C 0.7090(14) 0.9427(15) 0.866(2) 0.125(19) Uani 0.45(3) 1 d D U P A 2
H67D H 0.7352 0.9679 0.8802 0.187 Uiso 0.45(3) 1 calc R U P A 2
H67E H 0.7140 0.9344 0.8204 0.187 Uiso 0.45(3) 1 calc R U P A 2
H67F H 0.6743 0.9575 0.8726 0.187 Uiso 0.45(3) 1 calc R U P A 2
C45 C 0.8383(5) 0.7472(5) 0.8320(7) 0.067(3) Uani 1 1 d . . . . .
C46 C 0.8135(10) 0.7432(7) 0.7700(10) 0.108(7) Uani 1 1 d . . . . .
H46C H 0.7769 0.7528 0.7743 0.162 Uiso 1 1 calc R U . . .
H46A H 0.8305 0.7666 0.7391 0.162 Uiso 1 1 calc R U . . .
H46B H 0.8161 0.7075 0.7542 0.162 Uiso 1 1 calc R U . . .
C47 C 0.8935(7) 0.7327(6) 0.8260(9) 0.085(4) Uani 1 1 d . . . . .
H47A H 0.9103 0.7355 0.8686 0.128 Uiso 1 1 calc R U . . .
H47C H 0.8962 0.6970 0.8102 0.128 Uiso 1 1 calc R U . . .
H47B H 0.9106 0.7561 0.7952 0.128 Uiso 1 1 calc R U . . .
C48 C 0.8101(8) 0.7100(7) 0.8798(8) 0.088(5) Uani 1 1 d . . . . .
H48B H 0.8266 0.7121 0.9227 0.132 Uiso 1 1 calc R U . . .
H48C H 0.7736 0.7200 0.8834 0.132 Uiso 1 1 calc R U . . .
H48A H 0.8125 0.6744 0.8635 0.132 Uiso 1 1 calc R U . . .
C49 C 0.9974(5) 0.8169(5) 0.9776(6) 0.064(3) Uani 1 1 d . . . . .
C50 C 0.9674(5) 0.7880(4) 0.9983(7) 0.056(3) Uani 1 1 d . . . . .
C51 C 0.9293(5) 0.7506(5) 1.0174(6) 0.058(3) Uani 1 1 d . . . . .
C52 C 0.8830(6) 0.7662(6) 1.0466(7) 0.071(4) Uani 1 1 d . . . . .
H52 H 0.8768 0.8021 1.0536 0.086 Uiso 1 1 calc R U . . .
C53 C 0.8462(7) 0.7309(7) 1.0652(9) 0.085(4) Uani 1 1 d . . . . .
C54 C 0.8560(6) 0.6796(8) 1.0550(7) 0.083(4) Uani 1 1 d . . . . .
H54 H 0.8303 0.6553 1.0677 0.100 Uiso 1 1 calc R U . . .
C55 C 0.8994(7) 0.6615(6) 1.0284(7) 0.075(4) Uani 1 1 d . . . . .
C56 C 0.9389(6) 0.6978(5) 1.0085(6) 0.066(3) Uani 1 1 d . . . . .
H56 H 0.9706 0.6861 0.9900 0.080 Uiso 1 1 calc R U . . .
C57 C 0.7960(8) 0.7522(10) 1.0953(12) 0.137(9) Uani 1 1 d D U . . .
C58 C 0.7717(11) 0.7928(12) 1.0482(17) 0.168(13) Uani 1 1 d D U . . .
H58A H 0.7978 0.8188 1.0366 0.253 Uiso 1 1 calc R U . . .
H58B H 0.7596 0.7753 1.0087 0.253 Uiso 1 1 calc R U . . .
H58C H 0.7424 0.8099 1.0696 0.253 Uiso 1 1 calc R U . . .
C59 C 0.8084(11) 0.7847(13) 1.1579(14) 0.171(13) Uani 1 1 d D U . . .
H59A H 0.8334 0.8119 1.1472 0.257 Uiso 1 1 calc R U . . .
H59B H 0.7764 0.8005 1.1743 0.257 Uiso 1 1 calc R U . . .
H59C H 0.8230 0.7619 1.1913 0.257 Uiso 1 1 calc R U . . .
C60 C 0.7574(12) 0.7112(10) 1.1149(16) 0.150(10) Uani 1 1 d D U . . .
H60A H 0.7266 0.7277 1.1335 0.226 Uiso 1 1 calc R U . . .
H60B H 0.7475 0.6909 1.0765 0.226 Uiso 1 1 calc R U . . .
H60C H 0.7732 0.6882 1.1472 0.226 Uiso 1 1 calc R U . . .
C61 C 0.9135(9) 0.6027(6) 1.0159(9) 0.096(6) Uani 1 1 d . . . . .
C62 C 0.9075(11) 0.5945(9) 0.9392(13) 0.125(7) Uani 1 1 d . U . . .
H62C H 0.8728 0.6055 0.9256 0.188 Uiso 1 1 calc R U . . .
H62A H 0.9336 0.6153 0.9164 0.188 Uiso 1 1 calc R U . . .
H62B H 0.9124 0.5578 0.9287 0.188 Uiso 1 1 calc R U . . .
C63 C 0.8707(11) 0.5685(9) 1.0480(13) 0.133(9) Uani 1 1 d . . . . .
H63B H 0.8365 0.5799 1.0329 0.200 Uiso 1 1 calc R U . . .
H63A H 0.8761 0.5322 1.0358 0.200 Uiso 1 1 calc R U . . .
H63C H 0.8726 0.5719 1.0954 0.200 Uiso 1 1 calc R U . . .
C64 C 0.9633(11) 0.5872(8) 1.0369(19) 0.150(11) Uani 1 1 d . . . . .
H64A H 0.9896 0.6091 1.0162 0.226 Uiso 1 1 calc R U . . .
H64B H 0.9657 0.5907 1.0842 0.226 Uiso 1 1 calc R U . . .
H64C H 0.9692 0.5510 1.0247 0.226 Uiso 1 1 calc R U . . .
 
loop_
 _atom_site_aniso_label
 _atom_site_aniso_U_11
 _atom_site_aniso_U_22
 _atom_site_aniso_U_33
 _atom_site_aniso_U_23
 _atom_site_aniso_U_13
 _atom_site_aniso_U_12
Ag1 0.0548(7) 0.0380(6) 0.1036(10) 0.000 0.000 0.0128(5)
Ag2 0.0689(6) 0.0547(5) 0.0929(7) -0.0142(5) 0.0076(5) 0.0084(4)
Ag3 0.0694(6) 0.0450(4) 0.0689(5) -0.0002(4) -0.0039(4) -0.0039(4)
Ag4 0.1422(13) 0.0709(7) 0.0724(7) 0.0030(6) 0.0195(8) 0.0007(7)
Ag5 0.0918(11) 0.0735(9) 0.0605(7) 0.000 0.000 -0.0214(8)
C1 0.089(9) 0.043(6) 0.066(8) 0.004(5) 0.007(7) -0.005(6)
C2 0.064(8) 0.074(9) 0.089(11) -0.007(8) -0.010(8) 0.019(7)
C3 0.068(8) 0.062(7) 0.066(8) -0.001(6) 0.008(6) 0.005(6)
C4 0.075(9) 0.076(9) 0.104(12) 0.017(9) 0.015(9) 0.018(7)
C5 0.101(12) 0.088(11) 0.076(10) 0.005(8) 0.016(9) 0.012(9)
C6 0.106(12) 0.064(8) 0.072(9) -0.001(7) 0.010(8) 0.004(8)
C7 0.090(6) 0.077(6) 0.078(6) 0.013(5) 0.023(5) 0.011(5)
C8 0.081(10) 0.090(10) 0.064(8) 0.026(7) 0.024(7) 0.030(8)
C9 0.122(13) 0.072(9) 0.100(11) -0.010(9) 0.011(10) 0.006(9)
C10 0.141(14) 0.145(14) 0.185(15) -0.018(12) 0.039(12) -0.007(11)
C11 0.23(3) 0.26(4) 0.13(2) -0.07(2) -0.06(2) 0.05(3)
C12 0.16(2) 0.124(18) 0.19(3) -0.059(19) 0.06(2) -0.021(16)
C13 0.110(7) 0.098(7) 0.086(7) 0.005(6) 0.017(6) 0.000(6)
C14 0.17(2) 0.112(16) 0.095(14) 0.004(11) 0.031(14) -0.051(15)
C15 0.123(12) 0.112(11) 0.129(12) -0.017(10) 0.042(10) -0.024(9)
C16 0.18(2) 0.093(13) 0.085(12) 0.004(10) 0.030(14) 0.002(13)
C17 0.084(9) 0.080(10) 0.055(7) -0.015(6) -0.017(6) -0.007(7)
C18 0.067(8) 0.084(10) 0.061(7) -0.002(7) -0.001(6) -0.006(7)
C19 0.060(7) 0.072(8) 0.076(8) -0.014(7) 0.008(7) -0.009(6)
C20 0.061(8) 0.066(8) 0.090(10) -0.018(7) -0.001(7) 0.000(6)
C21 0.051(7) 0.111(12) 0.080(9) -0.005(9) 0.002(7) 0.007(7)
C22 0.052(7) 0.079(9) 0.115(12) -0.038(9) 0.022(8) 0.002(6)
C23 0.045(6) 0.090(10) 0.071(8) -0.015(7) 0.011(6) 0.006(6)
C24 0.054(6) 0.067(8) 0.071(8) -0.010(6) -0.001(6) -0.009(5)
C25 0.082(10) 0.104(12) 0.121(13) 0.021(9) 0.005(9) 0.034(8)
C26 0.204(18) 0.196(17) 0.199(17) -0.007(12) -0.041(13) 0.002(13)
C27 0.15(2) 0.15(2) 0.19(3) 0.017(15) 0.031(19) 0.056(17)
C28 0.146(14) 0.168(15) 0.143(13) 0.030(12) -0.003(12) 0.026(12)
C29 0.079(9) 0.083(10) 0.081(9) -0.029(8) 0.011(7) 0.001(7)
C30 0.071(9) 0.138(16) 0.078(10) -0.024(10) 0.003(7) -0.005(9)
C31 0.15(2) 0.124(16) 0.071(10) 0.015(10) 0.024(12) 0.032(14)
C32 0.132(17) 0.089(12) 0.107(13) -0.009(10) -0.016(12) -0.025(11)
C33 0.049(6) 0.047(6) 0.084(8) 0.005(6) 0.003(6) -0.009(5)
C34 0.049(6) 0.049(6) 0.066(7) 0.001(5) 0.000(5) -0.014(5)
C35 0.045(6) 0.046(5) 0.068(7) -0.004(5) -0.015(5) -0.011(4)
C36 0.058(7) 0.073(8) 0.090(9) -0.014(7) -0.023(7) -0.006(6)
C37 0.045(7) 0.089(10) 0.117(13) -0.010(9) -0.005(7) -0.015(7)
C38 0.052(8) 0.112(13) 0.093(10) -0.018(9) -0.002(7) -0.040(8)
C39 0.068(8) 0.073(8) 0.060(7) -0.004(6) -0.007(6) -0.018(6)
C40 0.058(7) 0.060(7) 0.047(6) -0.007(5) 0.005(5) -0.011(5)
C41 0.12(3) 0.16(3) 0.18(3) -0.01(2) -0.04(2) -0.02(2)
C65 0.16(3) 0.17(2) 0.17(3) -0.011(14) 0.001(14) 0.004(14)
C66 0.12(2) 0.14(2) 0.14(2) 0.004(13) -0.004(13) 0.005(13)
C67 0.09(3) 0.25(5) 0.17(4) -0.01(4) 0.06(3) -0.02(3)
C41A 0.038(13) 0.059(15) 0.14(2) -0.035(16) -0.028(14) -0.008(11)
C65A 0.032(14) 0.09(2) 0.19(4) -0.02(3) -0.01(2) -0.030(15)
C66A 0.065(13) 0.083(14) 0.103(16) -0.024(11) 0.027(11) 0.010(10)
C67A 0.051(19) 0.14(4) 0.18(4) -0.03(3) -0.03(2) 0.03(2)
C45 0.071(8) 0.059(7) 0.071(8) -0.013(6) 0.018(6) -0.029(6)
C46 0.17(2) 0.072(10) 0.085(11) -0.033(9) -0.030(12) -0.007(11)
C47 0.095(11) 0.071(9) 0.089(10) -0.036(8) 0.000(9) -0.012(8)
C48 0.113(13) 0.079(10) 0.073(9) -0.009(8) 0.001(8) -0.044(9)
C49 0.073(8) 0.055(7) 0.065(7) -0.016(6) -0.007(6) 0.004(6)
C50 0.054(6) 0.036(5) 0.077(7) -0.010(5) 0.002(6) -0.003(5)
C51 0.072(7) 0.049(6) 0.055(6) -0.004(5) 0.002(5) -0.015(5)
C52 0.076(9) 0.076(9) 0.061(8) -0.020(6) 0.008(6) -0.017(7)
C53 0.096(11) 0.084(10) 0.075(9) -0.015(8) -0.008(9) -0.018(8)
C54 0.069(9) 0.116(13) 0.065(8) 0.005(8) 0.001(7) -0.029(8)
C55 0.101(11) 0.063(7) 0.061(7) 0.014(6) -0.023(8) -0.030(7)
C56 0.088(9) 0.053(6) 0.059(7) -0.007(5) 0.001(6) -0.007(6)
C57 0.087(12) 0.174(19) 0.149(17) -0.017(16) 0.036(12) -0.044(13)
C58 0.124(19) 0.15(2) 0.24(3) 0.03(2) 0.03(2) 0.038(17)
C59 0.16(2) 0.20(3) 0.16(2) -0.05(2) 0.07(2) 0.01(2)
C60 0.152(14) 0.145(14) 0.154(14) -0.017(12) 0.012(12) -0.015(12)
C61 0.143(17) 0.050(7) 0.095(12) 0.003(7) -0.003(11) -0.027(9)
C62 0.158(13) 0.095(10) 0.122(11) -0.014(10) 0.010(11) -0.025(10)
C63 0.17(2) 0.089(13) 0.138(19) 0.023(12) -0.010(16) -0.059(14)
C64 0.15(2) 0.059(10) 0.25(3) 0.001(15) 0.01(2) -0.007(12)
 
_geom_special_details
;
 All esds (except the esd in the dihedral angle between two l.s. planes)
 are estimated using the full covariance matrix.  The cell esds are taken
 into account individually in the estimation of esds in distances, angles
 and torsion angles; correlations between esds in cell parameters are only
 used when they are defined by crystal symmetry.  An approximate (isotropic)
 treatment of cell esds is used for estimating esds involving l.s. planes.
;
 
loop_
 _geom_bond_atom_site_label_1
 _geom_bond_atom_site_label_2
 _geom_bond_distance
 _geom_bond_site_symmetry_2
 _geom_bond_publ_flag
Ag1 C33 2.074(11) 4_757 ?
Ag1 C33 2.074(11) 2_577 ?
Ag1 Ag1 2.775(3) 2_577 ?
Ag1 Ag4 2.8100(18) 4_757 ?
Ag1 Ag4 2.8100(18) 2_577 ?
Ag1 Ag2 3.0907(11) 3_775 ?
Ag1 Ag2 3.0908(11) . ?
Ag2 C1 2.231(14) 2_577 ?
Ag2 C49 2.315(12) . ?
Ag2 C50 2.694(10) . ?
Ag2 Ag3 2.9811(15) . ?
Ag2 Ag3 3.0160(13) 2_577 ?
Ag3 C1 2.000(14) . ?
Ag3 C49 2.103(15) . ?
Ag3 Ag4 2.9618(19) . ?
Ag3 Ag2 3.0160(13) 4_757 ?
Ag4 C17 2.212(14) . ?
Ag4 C33 2.353(14) . ?
Ag4 C18 2.595(15) . ?
Ag4 C34 2.707(12) . ?
Ag4 Ag1 2.8101(18) 2_577 ?
Ag4 Ag5 2.9531(16) . ?
Ag5 C17 2.021(16) 3_775 ?
Ag5 C17 2.021(16) . ?
Ag5 Ag4 2.9530(16) 3_775 ?
C1 C2 1.20(2) . ?
C1 Ag2 2.231(14) 4_757 ?
C2 C3 1.44(2) . ?
C3 C4 1.47(2) . ?
C3 C8 1.47(2) . ?
C4 C5 1.33(2) . ?
C4 H4 0.9500 . ?
C5 C6 1.42(2) . ?
C5 C9 1.44(2) . ?
C6 C7 1.43(2) . ?
C6 H6 0.9500 . ?
C7 C8 1.43(2) . ?
C7 C13 1.58(3) . ?
C8 H8 0.9500 . ?
C9 C11 1.55(2) . ?
C9 C10 1.57(2) . ?
C9 C12 1.59(2) . ?
C10 H10A 0.9800 . ?
C10 H10B 0.9800 . ?
C10 H10C 0.9800 . ?
C11 H11A 0.9800 . ?
C11 H11B 0.9800 . ?
C11 H11C 0.9800 . ?
C12 H12A 0.9800 . ?
C12 H12B 0.9800 . ?
C12 H12C 0.9800 . ?
C13 C14 1.45(3) . ?
C13 C16 1.59(4) . ?
C13 C15 1.60(3) . ?
C14 H14B 0.9800 . ?
C14 H14A 0.9800 . ?
C14 H14C 0.9800 . ?
C15 H15B 0.9800 . ?
C15 H15A 0.9800 . ?
C15 H15C 0.9800 . ?
C16 H16C 0.9800 . ?
C16 H16A 0.9800 . ?
C16 H16B 0.9800 . ?
C17 C18 1.26(2) . ?
C18 C19 1.44(2) . ?
C19 C20 1.32(2) . ?
C19 C24 1.42(2) . ?
C20 C21 1.46(2) . ?
C20 H20 0.9500 . ?
C21 C22 1.39(2) . ?
C21 C25 1.41(2) . ?
C22 C23 1.38(2) . ?
C22 H22 0.9500 . ?
C23 C24 1.42(2) . ?
C23 C29 1.54(2) . ?
C24 H24 0.9500 . ?
C25 C26 1.49(2) . ?
C25 C28 1.54(2) . ?
C25 C27 1.57(2) . ?
C26 H26A 0.9800 . ?
C26 H26B 0.9800 . ?
C26 H26C 0.9800 . ?
C27 H27A 0.9800 . ?
C27 H27B 0.9800 . ?
C27 H27C 0.9800 . ?
C28 H28A 0.9800 . ?
C28 H28B 0.9800 . ?
C28 H28C 0.9800 . ?
C29 C30 1.50(2) . ?
C29 C32 1.52(3) . ?
C29 C31 1.56(3) . ?
C30 H30A 0.9800 . ?
C30 H30B 0.9800 . ?
C30 H30C 0.9800 . ?
C31 H31A 0.9800 . ?
C31 H31C 0.9800 . ?
C31 H31B 0.9800 . ?
C32 H32B 0.9800 . ?
C32 H32C 0.9800 . ?
C32 H32A 0.9800 . ?
C33 C34 1.204(16) . ?
C33 Ag1 2.074(11) 2_577 ?
C34 C35 1.426(15) . ?
C35 C36 1.391(19) . ?
C35 C40 1.428(17) . ?
C36 C37 1.378(19) . ?
C36 H36 0.9500 . ?
C37 C38 1.45(3) . ?
C37 C41 1.55(3) . ?
C37 C41A 1.57(3) . ?
C38 C39 1.31(2) . ?
C38 H38 0.9500 . ?
C39 C40 1.407(18) . ?
C39 C45 1.54(2) . ?
C40 H40 0.9500 . ?
C41 C65 1.51(3) . ?
C41 C66 1.52(3) . ?
C41 C67 1.53(3) . ?
C65 H65A 0.9800 . ?
C65 H65B 0.9800 . ?
C65 H65C 0.9800 . ?
C66 H66A 0.9800 . ?
C66 H66B 0.9800 . ?
C66 H66C 0.9800 . ?
C67 H67A 0.9800 . ?
C67 H67B 0.9800 . ?
C67 H67C 0.9800 . ?
C41A C65A 1.53(2) . ?
C41A C66A 1.54(3) . ?
C41A C67A 1.56(3) . ?
C65A H65D 0.9800 . ?
C65A H65E 0.9800 . ?
C65A H65F 0.9800 . ?
C66A H66D 0.9800 . ?
C66A H66E 0.9800 . ?
C66A H66F 0.9800 . ?
C67A H67D 0.9800 . ?
C67A H67E 0.9800 . ?
C67A H67F 0.9800 . ?
C45 C46 1.43(2) . ?
C45 C47 1.48(2) . ?
C45 C48 1.55(2) . ?
C46 H46C 0.9800 . ?
C46 H46A 0.9800 . ?
C46 H46B 0.9800 . ?
C47 H47A 0.9800 . ?
C47 H47C 0.9800 . ?
C47 H47B 0.9800 . ?
C48 H48B 0.9800 . ?
C48 H48C 0.9800 . ?
C48 H48A 0.9800 . ?
C49 C50 1.155(18) . ?
C50 C51 1.435(17) . ?
C51 C56 1.397(18) . ?
C51 C52 1.40(2) . ?
C52 C53 1.37(2) . ?
C52 H52 0.9500 . ?
C53 C54 1.36(3) . ?
C53 C57 1.54(3) . ?
C54 C55 1.33(2) . ?
C54 H54 0.9500 . ?
C55 C56 1.44(2) . ?
C55 C61 1.58(2) . ?
C56 H56 0.9500 . ?
C57 C60 1.51(2) . ?
C57 C58 1.56(2) . ?
C57 C59 1.57(2) . ?
C58 H58A 0.9800 . ?
C58 H58B 0.9800 . ?
C58 H58C 0.9800 . ?
C59 H59A 0.9800 . ?
C59 H59B 0.9800 . ?
C59 H59C 0.9800 . ?
C60 H60A 0.9800 . ?
C60 H60B 0.9800 . ?
C60 H60C 0.9800 . ?
C61 C64 1.41(3) . ?
C61 C63 1.56(3) . ?
C61 C62 1.60(3) . ?
C62 H62C 0.9800 . ?
C62 H62A 0.9800 . ?
C62 H62B 0.9800 . ?
C63 H63B 0.9800 . ?
C63 H63A 0.9800 . ?
C63 H63C 0.9800 . ?
C64 H64A 0.9800 . ?
C64 H64B 0.9800 . ?
C64 H64C 0.9800 . ?
 
loop_
 _geom_angle_atom_site_label_1
 _geom_angle_atom_site_label_2
 _geom_angle_atom_site_label_3
 _geom_angle
 _geom_angle_site_symmetry_1
 _geom_angle_site_symmetry_3
 _geom_angle_publ_flag
C33 Ag1 C33 172.9(8) 4_757 2_577 ?
C33 Ag1 Ag1 93.6(4) 4_757 2_577 ?
C33 Ag1 Ag1 93.6(4) 2_577 2_577 ?
C33 Ag1 Ag4 55.1(4) 4_757 4_757 ?
C33 Ag1 Ag4 118.8(4) 2_577 4_757 ?
Ag1 Ag1 Ag4 135.76(4) 2_577 4_757 ?
C33 Ag1 Ag4 118.8(4) 4_757 2_577 ?
C33 Ag1 Ag4 55.1(4) 2_577 2_577 ?
Ag1 Ag1 Ag4 135.76(4) 2_577 2_577 ?
Ag4 Ag1 Ag4 88.47(7) 4_757 2_577 ?
C33 Ag1 Ag2 121.5(3) 4_757 3_775 ?
C33 Ag1 Ag2 60.5(4) 2_577 3_775 ?
Ag1 Ag1 Ag2 75.97(4) 2_577 3_775 ?
Ag4 Ag1 Ag2 93.77(4) 4_757 3_775 ?
Ag4 Ag1 Ag2 106.36(5) 2_577 3_775 ?
C33 Ag1 Ag2 60.5(4) 4_757 . ?
C33 Ag1 Ag2 121.5(3) 2_577 . ?
Ag1 Ag1 Ag2 75.97(4) 2_577 . ?
Ag4 Ag1 Ag2 106.36(5) 4_757 . ?
Ag4 Ag1 Ag2 93.77(4) 2_577 . ?
Ag2 Ag1 Ag2 151.94(8) 3_775 . ?
C1 Ag2 C49 138.5(5) 2_577 . ?
C1 Ag2 C50 114.6(5) 2_577 . ?
C49 Ag2 C50 25.2(4) . . ?
C1 Ag2 Ag3 166.5(3) 2_577 . ?
C49 Ag2 Ag3 44.6(4) . . ?
C50 Ag2 Ag3 69.8(3) . . ?
C1 Ag2 Ag3 41.5(3) 2_577 2_577 ?
C49 Ag2 Ag3 145.4(3) . 2_577 ?
C50 Ag2 Ag3 125.5(3) . 2_577 ?
Ag3 Ag2 Ag3 147.26(5) . 2_577 ?
C1 Ag2 Ag1 76.7(4) 2_577 . ?
C49 Ag2 Ag1 139.2(4) . . ?
C50 Ag2 Ag1 162.0(3) . . ?
Ag3 Ag2 Ag1 96.11(4) . . ?
Ag3 Ag2 Ag1 72.40(3) 2_577 . ?
C1 Ag3 C49 170.4(6) . . ?
C1 Ag3 Ag4 66.7(4) . . ?
C49 Ag3 Ag4 105.1(4) . . ?
C1 Ag3 Ag2 131.6(4) . . ?
C49 Ag3 Ag2 50.7(3) . . ?
Ag4 Ag3 Ag2 89.61(5) . . ?
C1 Ag3 Ag2 47.7(4) . 4_757 ?
C49 Ag3 Ag2 140.3(3) . 4_757 ?
Ag4 Ag3 Ag2 92.31(4) . 4_757 ?
Ag2 Ag3 Ag2 95.19(5) . 4_757 ?
C17 Ag4 C33 146.2(5) . . ?
C17 Ag4 C18 29.1(5) . . ?
C33 Ag4 C18 146.7(4) . . ?
C17 Ag4 C34 128.1(5) . . ?
C33 Ag4 C34 26.4(4) . . ?
C18 Ag4 C34 120.4(4) . . ?
C17 Ag4 Ag1 137.2(4) . 2_577 ?
C33 Ag4 Ag1 46.3(3) . 2_577 ?
C18 Ag4 Ag1 164.8(3) . 2_577 ?
C34 Ag4 Ag1 72.5(2) . 2_577 ?
C17 Ag4 Ag5 43.2(4) . . ?
C33 Ag4 Ag5 119.2(3) . . ?
C18 Ag4 Ag5 72.2(4) . . ?
C34 Ag4 Ag5 123.5(3) . . ?
Ag1 Ag4 Ag5 94.17(5) 2_577 . ?
C17 Ag4 Ag3 131.3(4) . . ?
C33 Ag4 Ag3 81.2(3) . . ?
C18 Ag4 Ag3 109.2(4) . . ?
C34 Ag4 Ag3 89.4(3) . . ?
Ag1 Ag4 Ag3 77.31(5) 2_577 . ?
Ag5 Ag4 Ag3 142.18(7) . . ?
C17 Ag5 C17 180.0(8) 3_775 . ?
C17 Ag5 Ag4 48.5(4) 3_775 3_775 ?
C17 Ag5 Ag4 131.5(4) . 3_775 ?
C17 Ag5 Ag4 131.5(4) 3_775 . ?
C17 Ag5 Ag4 48.5(4) . . ?
Ag4 Ag5 Ag4 83.19(6) 3_775 . ?
C2 C1 Ag3 149.0(13) . . ?
C2 C1 Ag2 120.2(11) . 4_757 ?
Ag3 C1 Ag2 90.8(6) . 4_757 ?
C1 C2 C3 177.2(17) . . ?
C2 C3 C4 117.9(13) . . ?
C2 C3 C8 120.7(13) . . ?
C4 C3 C8 121.2(13) . . ?
C5 C4 C3 121.1(16) . . ?
C5 C4 H4 119.4 . . ?
C3 C4 H4 119.4 . . ?
C4 C5 C6 117.3(17) . . ?
C4 C5 C9 120.3(17) . . ?
C6 C5 C9 121.1(15) . . ?
C5 C6 C7 125.3(15) . . ?
C5 C6 H6 117.3 . . ?
C7 C6 H6 117.3 . . ?
C6 C7 C8 118.1(15) . . ?
C6 C7 C13 124.5(14) . . ?
C8 C7 C13 117.1(15) . . ?
C7 C8 C3 115.9(16) . . ?
C7 C8 H8 122.1 . . ?
C3 C8 H8 122.1 . . ?
C5 C9 C11 110.6(19) . . ?
C5 C9 C10 117.0(18) . . ?
C11 C9 C10 100(2) . . ?
C5 C9 C12 113.8(17) . . ?
C11 C9 C12 107(2) . . ?
C10 C9 C12 106.9(17) . . ?
C9 C10 H10A 109.5 . . ?
C9 C10 H10B 109.5 . . ?
H10A C10 H10B 109.5 . . ?
C9 C10 H10C 109.5 . . ?
H10A C10 H10C 109.5 . . ?
H10B C10 H10C 109.5 . . ?
C9 C11 H11A 109.5 . . ?
C9 C11 H11B 109.5 . . ?
H11A C11 H11B 109.5 . . ?
C9 C11 H11C 109.5 . . ?
H11A C11 H11C 109.5 . . ?
H11B C11 H11C 109.5 . . ?
C9 C12 H12A 109.5 . . ?
C9 C12 H12B 109.5 . . ?
H12A C12 H12B 109.5 . . ?
C9 C12 H12C 109.5 . . ?
H12A C12 H12C 109.5 . . ?
H12B C12 H12C 109.5 . . ?
C14 C13 C7 118.2(16) . . ?
C14 C13 C16 105.8(19) . . ?
C7 C13 C16 101.7(16) . . ?
C14 C13 C15 115.0(19) . . ?
C7 C13 C15 105.2(16) . . ?
C16 C13 C15 109.9(18) . . ?
C13 C14 H14B 109.5 . . ?
C13 C14 H14A 109.5 . . ?
H14B C14 H14A 109.5 . . ?
C13 C14 H14C 109.5 . . ?
H14B C14 H14C 109.5 . . ?
H14A C14 H14C 109.5 . . ?
C13 C15 H15B 109.5 . . ?
C13 C15 H15A 109.5 . . ?
H15B C15 H15A 109.5 . . ?
C13 C15 H15C 109.5 . . ?
H15B C15 H15C 109.5 . . ?
H15A C15 H15C 109.5 . . ?
C13 C16 H16C 109.5 . . ?
C13 C16 H16A 109.5 . . ?
H16C C16 H16A 109.5 . . ?
C13 C16 H16B 109.5 . . ?
H16C C16 H16B 109.5 . . ?
H16A C16 H16B 109.5 . . ?
C18 C17 Ag5 174.1(14) . . ?
C18 C17 Ag4 92.5(10) . . ?
Ag5 C17 Ag4 88.4(5) . . ?
C17 C18 C19 173.2(15) . . ?
C17 C18 Ag4 58.4(9) . . ?
C19 C18 Ag4 128.3(10) . . ?
C20 C19 C24 119.3(14) . . ?
C20 C19 C18 122.3(13) . . ?
C24 C19 C18 118.4(14) . . ?
C19 C20 C21 125.4(14) . . ?
C19 C20 H20 117.3 . . ?
C21 C20 H20 117.3 . . ?
C22 C21 C25 121.7(18) . . ?
C22 C21 C20 111.9(15) . . ?
C25 C21 C20 126.0(16) . . ?
C23 C22 C21 125.9(15) . . ?
C23 C22 H22 117.0 . . ?
C21 C22 H22 117.0 . . ?
C22 C23 C24 118.2(13) . . ?
C22 C23 C29 122.2(14) . . ?
C24 C23 C29 119.6(14) . . ?
C23 C24 C19 119.2(14) . . ?
C23 C24 H24 120.4 . . ?
C19 C24 H24 120.4 . . ?
C21 C25 C26 110(2) . . ?
C21 C25 C28 110.2(17) . . ?
C26 C25 C28 106(2) . . ?
C21 C25 C27 111.8(19) . . ?
C26 C25 C27 117(2) . . ?
C28 C25 C27 100(2) . . ?
C25 C26 H26A 109.5 . . ?
C25 C26 H26B 109.5 . . ?
H26A C26 H26B 109.5 . . ?
C25 C26 H26C 109.5 . . ?
H26A C26 H26C 109.5 . . ?
H26B C26 H26C 109.5 . . ?
C25 C27 H27A 109.5 . . ?
C25 C27 H27B 109.5 . . ?
H27A C27 H27B 109.5 . . ?
C25 C27 H27C 109.5 . . ?
H27A C27 H27C 109.5 . . ?
H27B C27 H27C 109.5 . . ?
C25 C28 H28A 109.5 . . ?
C25 C28 H28B 109.5 . . ?
H28A C28 H28B 109.5 . . ?
C25 C28 H28C 109.5 . . ?
H28A C28 H28C 109.5 . . ?
H28B C28 H28C 109.5 . . ?
C30 C29 C32 110.4(16) . . ?
C30 C29 C23 111.3(12) . . ?
C32 C29 C23 113.0(16) . . ?
C30 C29 C31 110.3(17) . . ?
C32 C29 C31 105.7(15) . . ?
C23 C29 C31 105.8(15) . . ?
C29 C30 H30A 109.5 . . ?
C29 C30 H30B 109.5 . . ?
H30A C30 H30B 109.5 . . ?
C29 C30 H30C 109.5 . . ?
H30A C30 H30C 109.5 . . ?
H30B C30 H30C 109.5 . . ?
C29 C31 H31A 109.5 . . ?
C29 C31 H31C 109.5 . . ?
H31A C31 H31C 109.5 . . ?
C29 C31 H31B 109.5 . . ?
H31A C31 H31B 109.5 . . ?
H31C C31 H31B 109.5 . . ?
C29 C32 H32B 109.5 . . ?
C29 C32 H32C 109.5 . . ?
H32B C32 H32C 109.5 . . ?
C29 C32 H32A 109.5 . . ?
H32B C32 H32A 109.5 . . ?
H32C C32 H32A 109.5 . . ?
C34 C33 Ag1 169.1(12) . 2_577 ?
C34 C33 Ag4 93.5(10) . . ?
Ag1 C33 Ag4 78.5(4) 2_577 . ?
C33 C34 C35 176.2(14) . . ?
C33 C34 Ag4 60.2(8) . . ?
C35 C34 Ag4 123.1(9) . . ?
C36 C35 C34 120.7(11) . . ?
C36 C35 C40 118.8(10) . . ?
C34 C35 C40 120.4(11) . . ?
C37 C36 C35 122.5(14) . . ?
C37 C36 H36 118.7 . . ?
C35 C36 H36 118.7 . . ?
C36 C37 C38 115.3(14) . . ?
C36 C37 C41 134(2) . . ?
C38 C37 C41 111(2) . . ?
C36 C37 C41A 116.8(17) . . ?
C38 C37 C41A 126.5(15) . . ?
C39 C38 C37 124.4(12) . . ?
C39 C38 H38 117.8 . . ?
C37 C38 H38 117.8 . . ?
C38 C39 C40 119.3(14) . . ?
C38 C39 C45 120.6(13) . . ?
C40 C39 C45 119.9(13) . . ?
C39 C40 C35 119.3(12) . . ?
C39 C40 H40 120.4 . . ?
C35 C40 H40 120.4 . . ?
C65 C41 C66 117(3) . . ?
C65 C41 C67 110(3) . . ?
C66 C41 C67 110(3) . . ?
C65 C41 C37 103(4) . . ?
C66 C41 C37 107(3) . . ?
C67 C41 C37 111(3) . . ?
C41 C65 H65A 109.4 . . ?
C41 C65 H65B 109.6 . . ?
H65A C65 H65B 109.5 . . ?
C41 C65 H65C 109.4 . . ?
H65A C65 H65C 109.5 . . ?
H65B C65 H65C 109.5 . . ?
C41 C66 H66A 109.5 . . ?
C41 C66 H66B 109.5 . . ?
H66A C66 H66B 109.5 . . ?
C41 C66 H66C 109.4 . . ?
H66A C66 H66C 109.5 . . ?
H66B C66 H66C 109.5 . . ?
C41 C67 H67A 109.3 . . ?
C41 C67 H67B 109.6 . . ?
H67A C67 H67B 109.5 . . ?
C41 C67 H67C 109.5 . . ?
H67A C67 H67C 109.5 . . ?
H67B C67 H67C 109.5 . . ?
C65A C41A C66A 109(3) . . ?
C65A C41A C67A 109(3) . . ?
C66A C41A C67A 109(3) . . ?
C65A C41A C37 109(2) . . ?
C66A C41A C37 116(2) . . ?
C67A C41A C37 104(2) . . ?
C41A C65A H65D 109.5 . . ?
C41A C65A H65E 109.5 . . ?
H65D C65A H65E 109.5 . . ?
C41A C65A H65F 109.5 . . ?
H65D C65A H65F 109.5 . . ?
H65E C65A H65F 109.5 . . ?
C41A C66A H66D 109.5 . . ?
C41A C66A H66E 109.5 . . ?
H66D C66A H66E 109.5 . . ?
C41A C66A H66F 109.5 . . ?
H66D C66A H66F 109.5 . . ?
H66E C66A H66F 109.5 . . ?
C41A C67A H67D 109.4 . . ?
C41A C67A H67E 109.6 . . ?
H67D C67A H67E 109.5 . . ?
C41A C67A H67F 109.5 . . ?
H67D C67A H67F 109.5 . . ?
H67E C67A H67F 109.5 . . ?
C46 C45 C47 109.8(15) . . ?
C46 C45 C39 109.8(14) . . ?
C47 C45 C39 114.3(11) . . ?
C46 C45 C48 108.1(14) . . ?
C47 C45 C48 110.3(15) . . ?
C39 C45 C48 104.2(12) . . ?
C45 C46 H46C 109.5 . . ?
C45 C46 H46A 109.5 . . ?
H46C C46 H46A 109.5 . . ?
C45 C46 H46B 109.5 . . ?
H46C C46 H46B 109.5 . . ?
H46A C46 H46B 109.5 . . ?
C45 C47 H47A 109.5 . . ?
C45 C47 H47C 109.5 . . ?
H47A C47 H47C 109.5 . . ?
C45 C47 H47B 109.5 . . ?
H47A C47 H47B 109.5 . . ?
H47C C47 H47B 109.5 . . ?
C45 C48 H48B 109.5 . . ?
C45 C48 H48C 109.5 . . ?
H48B C48 H48C 109.5 . . ?
C45 C48 H48A 109.5 . . ?
H48B C48 H48A 109.5 . . ?
H48C C48 H48A 109.5 . . ?
C50 C49 Ag3 176.9(12) . . ?
C50 C49 Ag2 96.1(10) . . ?
Ag3 C49 Ag2 84.7(5) . . ?
C49 C50 C51 174.3(14) . . ?
C49 C50 Ag2 58.7(8) . . ?
C51 C50 Ag2 124.8(8) . . ?
C56 C51 C52 119.4(12) . . ?
C56 C51 C50 119.9(12) . . ?
C52 C51 C50 120.6(11) . . ?
C53 C52 C51 121.3(15) . . ?
C53 C52 H52 119.4 . . ?
C51 C52 H52 119.4 . . ?
C54 C53 C52 118.4(16) . . ?
C54 C53 C57 124.4(16) . . ?
C52 C53 C57 117.2(16) . . ?
C55 C54 C53 124.0(15) . . ?
C55 C54 H54 118.0 . . ?
C53 C54 H54 118.0 . . ?
C54 C55 C56 118.9(15) . . ?
C54 C55 C61 126.6(15) . . ?
C56 C55 C61 114.5(15) . . ?
C51 C56 C55 118.0(14) . . ?
C51 C56 H56 121.0 . . ?
C55 C56 H56 121.0 . . ?
C60 C57 C53 114(2) . . ?
C60 C57 C58 112(2) . . ?
C53 C57 C58 109.2(18) . . ?
C60 C57 C59 107(2) . . ?
C53 C57 C59 110.4(17) . . ?
C58 C57 C59 103(2) . . ?
C57 C58 H58A 109.5 . . ?
C57 C58 H58B 109.5 . . ?
H58A C58 H58B 109.5 . . ?
C57 C58 H58C 109.5 . . ?
H58A C58 H58C 109.5 . . ?
H58B C58 H58C 109.5 . . ?
C57 C59 H59A 109.5 . . ?
C57 C59 H59B 109.5 . . ?
H59A C59 H59B 109.5 . . ?
C57 C59 H59C 109.5 . . ?
H59A C59 H59C 109.5 . . ?
H59B C59 H59C 109.5 . . ?
C57 C60 H60A 109.5 . . ?
C57 C60 H60B 109.5 . . ?
H60A C60 H60B 109.5 . . ?
C57 C60 H60C 109.5 . . ?
H60A C60 H60C 109.5 . . ?
H60B C60 H60C 109.5 . . ?
C64 C61 C63 111(2) . . ?
C64 C61 C55 115.6(16) . . ?
C63 C61 C55 108.2(19) . . ?
C64 C61 C62 111(2) . . ?
C63 C61 C62 105.8(17) . . ?
C55 C61 C62 105.3(15) . . ?
C61 C62 H62C 109.5 . . ?
C61 C62 H62A 109.5 . . ?
H62C C62 H62A 109.5 . . ?
C61 C62 H62B 109.5 . . ?
H62C C62 H62B 109.5 . . ?
H62A C62 H62B 109.5 . . ?
C61 C63 H63B 109.5 . . ?
C61 C63 H63A 109.5 . . ?
H63B C63 H63A 109.5 . . ?
C61 C63 H63C 109.5 . . ?
H63B C63 H63C 109.5 . . ?
H63A C63 H63C 109.5 . . ?
C61 C64 H64A 109.5 . . ?
C61 C64 H64B 109.5 . . ?
H64A C64 H64B 109.5 . . ?
C61 C64 H64C 109.5 . . ?
H64A C64 H64C 109.5 . . ?
H64B C64 H64C 109.5 . . ?
 
loop_
 _geom_torsion_atom_site_label_1
 _geom_torsion_atom_site_label_2
 _geom_torsion_atom_site_label_3
 _geom_torsion_atom_site_label_4
 _geom_torsion
 _geom_torsion_site_symmetry_1
 _geom_torsion_site_symmetry_2
 _geom_torsion_site_symmetry_3
 _geom_torsion_site_symmetry_4
 _geom_torsion_publ_flag
C2 C3 C4 C5 172.8(17) . . . . ?
C8 C3 C4 C5 -13(2) . . . . ?
C3 C4 C5 C6 9(3) . . . . ?
C3 C4 C5 C9 176.0(16) . . . . ?
C4 C5 C6 C7 -3(3) . . . . ?
C9 C5 C6 C7 -169.8(18) . . . . ?
C5 C6 C7 C8 0(3) . . . . ?
C5 C6 C7 C13 -173.1(18) . . . . ?
C6 C7 C8 C3 -4(2) . . . . ?
C13 C7 C8 C3 170.3(15) . . . . ?
C2 C3 C8 C7 -176.3(14) . . . . ?
C4 C3 C8 C7 10(2) . . . . ?
C4 C5 C9 C11 138(2) . . . . ?
C6 C5 C9 C11 -56(3) . . . . ?
C4 C5 C9 C10 24(3) . . . . ?
C6 C5 C9 C10 -170(2) . . . . ?
C4 C5 C9 C12 -102(2) . . . . ?
C6 C5 C9 C12 64(3) . . . . ?
C6 C7 C13 C14 171(2) . . . . ?
C8 C7 C13 C14 -2(3) . . . . ?
C6 C7 C13 C16 56(2) . . . . ?
C8 C7 C13 C16 -117.6(18) . . . . ?
C6 C7 C13 C15 -59(2) . . . . ?
C8 C7 C13 C15 127.8(18) . . . . ?
Ag4 C18 C19 C20 -36(2) . . . . ?
Ag4 C18 C19 C24 145.4(11) . . . . ?
C24 C19 C20 C21 0(2) . . . . ?
C18 C19 C20 C21 -179.1(14) . . . . ?
C19 C20 C21 C22 1(2) . . . . ?
C19 C20 C21 C25 174.9(16) . . . . ?
C25 C21 C22 C23 -176.0(15) . . . . ?
C20 C21 C22 C23 -2(2) . . . . ?
C21 C22 C23 C24 2(2) . . . . ?
C21 C22 C23 C29 -178.7(14) . . . . ?
C22 C23 C24 C19 -0.2(19) . . . . ?
C29 C23 C24 C19 -180.0(13) . . . . ?
C20 C19 C24 C23 0(2) . . . . ?
C18 C19 C24 C23 178.7(12) . . . . ?
C22 C21 C25 C26 167(2) . . . . ?
C20 C21 C25 C26 -6(3) . . . . ?
C22 C21 C25 C28 -76(2) . . . . ?
C20 C21 C25 C28 110(2) . . . . ?
C22 C21 C25 C27 34(3) . . . . ?
C20 C21 C25 C27 -139(2) . . . . ?
C22 C23 C29 C30 130.4(16) . . . . ?
C24 C23 C29 C30 -50(2) . . . . ?
C22 C23 C29 C32 5(2) . . . . ?
C24 C23 C29 C32 -174.8(15) . . . . ?
C22 C23 C29 C31 -109.8(17) . . . . ?
C24 C23 C29 C31 70.0(17) . . . . ?
Ag1 C33 C34 Ag4 42(6) 2_577 . . . ?
Ag4 C34 C35 C36 -137.9(12) . . . . ?
Ag4 C34 C35 C40 38.9(15) . . . . ?
C34 C35 C36 C37 174.0(16) . . . . ?
C40 C35 C36 C37 -3(2) . . . . ?
C35 C36 C37 C38 6(3) . . . . ?
C35 C36 C37 C41 -176(3) . . . . ?
C35 C36 C37 C41A 173.8(19) . . . . ?
C36 C37 C38 C39 -6(3) . . . . ?
C41 C37 C38 C39 176(2) . . . . ?
C41A C37 C38 C39 -172(2) . . . . ?
C37 C38 C39 C40 2(3) . . . . ?
C37 C38 C39 C45 -173.9(16) . . . . ?
C38 C39 C40 C35 1(2) . . . . ?
C45 C39 C40 C35 177.4(12) . . . . ?
C36 C35 C40 C39 -1.1(19) . . . . ?
C34 C35 C40 C39 -177.9(12) . . . . ?
C36 C37 C41 C65 -1(4) . . . . ?
C38 C37 C41 C65 177(3) . . . . ?
C36 C37 C41 C66 122(3) . . . . ?
C38 C37 C41 C66 -60(3) . . . . ?
C36 C37 C41 C67 -118(4) . . . . ?
C38 C37 C41 C67 60(4) . . . . ?
C36 C37 C41A C65A -179(3) . . . . ?
C38 C37 C41A C65A -13(4) . . . . ?
C36 C37 C41A C66A -55(3) . . . . ?
C38 C37 C41A C66A 111(3) . . . . ?
C36 C37 C41A C67A 65(3) . . . . ?
C38 C37 C41A C67A -129(3) . . . . ?
C38 C39 C45 C46 56(2) . . . . ?
C40 C39 C45 C46 -119.9(16) . . . . ?
C38 C39 C45 C47 179.9(16) . . . . ?
C40 C39 C45 C47 4(2) . . . . ?
C38 C39 C45 C48 -59.6(19) . . . . ?
C40 C39 C45 C48 124.5(14) . . . . ?
Ag2 C50 C51 C56 -167.8(9) . . . . ?
Ag2 C50 C51 C52 10.5(18) . . . . ?
C56 C51 C52 C53 -2(2) . . . . ?
C50 C51 C52 C53 -179.9(14) . . . . ?
C51 C52 C53 C54 0(2) . . . . ?
C51 C52 C53 C57 -178.5(16) . . . . ?
C52 C53 C54 C55 1(3) . . . . ?
C57 C53 C54 C55 179.3(17) . . . . ?
C53 C54 C55 C56 0(2) . . . . ?
C53 C54 C55 C61 179.2(16) . . . . ?
C52 C51 C56 C55 1.9(19) . . . . ?
C50 C51 C56 C55 -179.9(12) . . . . ?
C54 C55 C56 C51 -1(2) . . . . ?
C61 C55 C56 C51 179.5(13) . . . . ?
C54 C53 C57 C60 1(3) . . . . ?
C52 C53 C57 C60 -180(2) . . . . ?
C54 C53 C57 C58 -125(2) . . . . ?
C52 C53 C57 C58 54(2) . . . . ?
C54 C53 C57 C59 122(2) . . . . ?
C52 C53 C57 C59 -59(3) . . . . ?
C54 C55 C61 C64 -132(2) . . . . ?
C56 C55 C61 C64 48(3) . . . . ?
C54 C55 C61 C63 -7(2) . . . . ?
C56 C55 C61 C63 172.6(16) . . . . ?
C54 C55 C61 C62 106(2) . . . . ?
C56 C55 C61 C62 -74.6(19) . . . . ?
 
_refine_diff_density_max    2.386
_refine_diff_density_min   -1.157
_refine_diff_density_rms    0.127

_shelx_res_file
;

    2_sq.res created by SHELXL-2014/7


TITL zrAg_4_P45_2 in I-4
CELL 0.71073 25.807 25.807 20.5657 90 90 90
ZERR 2 0.0009 0.0009 0.001 0 0 0
LATT -2
SYMM +Y,-X,-Z
SYMM -X,-Y,+Z
SYMM -Y,+X,-Z
SFAC C H Ag
UNIT 512 672 32

DFIX 1.54 C9 C10 C9 C11 C9 C12
DFIX 1.54 C25 C26 C25 C27 C25 C28
DFIX 1.54 C41 C65 C41 C66 C41 C67
DFIX 1.54 C41A C65A C41A C66A C41A C67A
DFIX 1.54 C57 C58 C57 C59 C57 C60

SADI 0.02 C41 C37 C41A C37

DANG 2.51 C10 C11 C10 C12 C11 C12
DANG 2.51 C26 C27 C26 C28 C27 C28
DANG 2.51 C58 C59 C58 C60 C59 C60
DANG 2.51 C65 C66 C65 C67 C66 C67
DANG 2.51 C65A C66A C65A C67A C66A C67A

ISOR 0.02 0.04 C9 C11 C12
ISOR 0.02 0.04 C25 C27
ISOR 0.02 0.04 C41 C67
ISOR 0.02 0.04 C41A C65A C67A
ISOR 0.02 0.04 C57 C58 C59 C60
ISOR 0.005 0.01 C7 C10 C13 C15 C28 C66A C62 C60 C65 C66 C26
DELU C25 C26 C27 C41 C65

rem DAMP 0 0
SIZE 0.22 0.24 0.25
TEMP -123.15
BOND $H
ACTA
CONF
WPDB 1
HTAB

L.S. 5 0   81
PLAN 10
FMAP 2

ABIN
WGHT    0.141400   23.379400
FVAR       0.03863   0.54749
AG1   3    1.000000    1.000000    1.067461    10.50000    0.05479    0.03804 =
         0.10355    0.00000    0.00000    0.01280
AG2   3    0.965323    0.889104    1.031022    11.00000    0.06893    0.05469 =
         0.09288   -0.01415    0.00763    0.00839
AG3   3    1.049781    0.869400    0.935273    11.00000    0.06936    0.04503 =
         0.06889   -0.00015   -0.00387   -0.00395
AG4   3    0.989192    0.924809    0.834644    11.00000    0.14215    0.07086 =
         0.07236    0.00298    0.01952    0.00070
AG5   3    1.000000    1.000000    0.727254    10.50000    0.09180    0.07346 =
         0.06054    0.00000    0.00000   -0.02137
C1    1    1.092687    0.917601    0.881445    11.00000    0.08918    0.04340 =
         0.06597    0.00381    0.00747   -0.00511
C2    1    1.108736    0.930162    0.829135    11.00000    0.06416    0.07445 =
         0.08898   -0.00750   -0.01036    0.01888
C3    1    1.126711    0.943029    0.765096    11.00000    0.06847    0.06201 =
         0.06605   -0.00081    0.00784    0.00520
C4    1    1.132581    0.900800    0.717972    11.00000    0.07534    0.07624 =
         0.10359    0.01747    0.01452    0.01797
AFIX  43
H4    2    1.128360    0.865969    0.731951    11.00000   -1.20000
AFIX   0
C5    1    1.143681    0.910393    0.656172    11.00000    0.10064    0.08814 =
         0.07555    0.00489    0.01609    0.01202
C6    1    1.157230    0.962216    0.639504    11.00000    0.10638    0.06426 =
         0.07226   -0.00150    0.01024    0.00448
AFIX  43
H6    2    1.166869    0.968740    0.595681    11.00000   -1.20000
AFIX   0
C7    1    1.157512    1.005177    0.683276    11.00000    0.08956    0.07731 =
         0.07797    0.01257    0.02281    0.01099
C8    1    1.143396    0.996013    0.749513    11.00000    0.08084    0.09042 =
         0.06376    0.02559    0.02410    0.02988
AFIX  43
H8    2    1.144726    1.022555    0.781478    11.00000   -1.20000
AFIX   0
C9    1    1.152622    0.868195    0.611468    11.00000    0.12233    0.07243 =
         0.10048   -0.00996    0.01118    0.00559
C10   1    1.128026    0.814387    0.629245    11.00000    0.14077    0.14462 =
         0.18470   -0.01834    0.03862   -0.00651
AFIX  33
H10A  2    1.136712    0.789024    0.595496    11.00000   -1.50000
H10B  2    1.141723    0.802609    0.671160    11.00000   -1.50000
H10C  2    1.090291    0.817939    0.632176    11.00000   -1.50000
AFIX   0
C11   1    1.125509    0.878877    0.545438    11.00000    0.22622    0.26423 =
         0.12893   -0.07398   -0.06452    0.05165
AFIX  33
H11A  2    1.131965    0.849900    0.515724    11.00000   -1.50000
H11B  2    1.088128    0.882604    0.552400    11.00000   -1.50000
H11C  2    1.139318    0.910872    0.526503    11.00000   -1.50000
AFIX   0
C12   1    1.211997    0.858020    0.596351    11.00000    0.16191    0.12416 =
         0.18731   -0.05868    0.06409   -0.02115
AFIX  33
H12A  2    1.215192    0.829019    0.565850    11.00000   -1.50000
H12B  2    1.227311    0.889177    0.577043    11.00000   -1.50000
H12C  2    1.230189    0.849574    0.636814    11.00000   -1.50000
AFIX   0
C13   1    1.166799    1.063219    0.662371    11.00000    0.11033    0.09823 =
         0.08609    0.00475    0.01662   -0.00028
C14   1    1.158626    1.103535    0.710513    11.00000    0.16773    0.11247 =
         0.09465    0.00395    0.03113   -0.05064
AFIX  33
H14B  2    1.165755    1.137438    0.690999    11.00000   -1.50000
H14A  2    1.122625    1.102447    0.725613    11.00000   -1.50000
H14C  2    1.181980    1.097939    0.747426    11.00000   -1.50000
AFIX   0
C15   1    1.222649    1.063612    0.628449    11.00000    0.12332    0.11154 =
         0.12940   -0.01750    0.04239   -0.02359
AFIX  33
H15B  2    1.224724    1.035261    0.596854    11.00000   -1.50000
H15A  2    1.227865    1.096751    0.606120    11.00000   -1.50000
H15C  2    1.249536    1.059065    0.661612    11.00000   -1.50000
AFIX   0
C16   1    1.122978    1.071240    0.609219    11.00000    0.18346    0.09263 =
         0.08482    0.00408    0.02963    0.00236
AFIX  33
H16C  2    1.126601    1.044894    0.575204    11.00000   -1.50000
H16A  2    1.088847    1.067995    0.629706    11.00000   -1.50000
H16B  2    1.126418    1.105787    0.589912    11.00000   -1.50000
AFIX   0
C17   1    0.992800    0.922027    0.727249    11.00000    0.08436    0.07965 =
         0.05521   -0.01473   -0.01714   -0.00663
C18   1    0.993311    0.873033    0.726581    11.00000    0.06684    0.08417 =
         0.06095   -0.00211   -0.00140   -0.00588
C19   1    0.995118    0.817764    0.717725    11.00000    0.06047    0.07171 =
         0.07609   -0.01373    0.00753   -0.00859
C20   1    1.020251    0.786793    0.758248    11.00000    0.06134    0.06588 =
         0.08968   -0.01818   -0.00082    0.00034
AFIX  43
H20   2    1.036959    0.802448    0.794419    11.00000   -1.20000
AFIX   0
C21   1    1.024423    0.730522    0.751953    11.00000    0.05107    0.11063 =
         0.08009   -0.00521    0.00216    0.00742
C22   1    0.999272    0.712312    0.696720    11.00000    0.05209    0.07874 =
         0.11459   -0.03757    0.02185    0.00209
AFIX  43
H22   2    1.001126    0.676140    0.688472    11.00000   -1.20000
AFIX   0
C23   1    0.971880    0.741979    0.652823    11.00000    0.04543    0.08998 =
         0.07098   -0.01467    0.01088    0.00602
C24   1    0.969604    0.796149    0.663112    11.00000    0.05437    0.06747 =
         0.07094   -0.01024   -0.00115   -0.00947
AFIX  43
H24   2    0.951176    0.817767    0.633731    11.00000   -1.20000
AFIX   0
C25   1    1.054159    0.697609    0.791752    11.00000    0.08162    0.10363 =
         0.12085    0.02088    0.00465    0.03364
C26   1    1.086347    0.728602    0.837860    11.00000    0.20419    0.19582 =
         0.19935   -0.00692   -0.04080    0.00185
AFIX  33
H26A  2    1.106797    0.705165    0.865194    11.00000   -1.50000
H26B  2    1.109684    0.751245    0.813247    11.00000   -1.50000
H26C  2    1.063687    0.749740    0.865403    11.00000   -1.50000
AFIX   0
C27   1    1.082279    0.654413    0.751148    11.00000    0.14770    0.14885 =
         0.18802    0.01660    0.03111    0.05591
AFIX  33
H27A  2    1.102541    0.632314    0.780391    11.00000   -1.50000
H27B  2    1.056420    0.633330    0.728391    11.00000   -1.50000
H27C  2    1.105421    0.670641    0.719325    11.00000   -1.50000
AFIX   0
C28   1    1.018556    0.663887    0.834058    11.00000    0.14621    0.16782 =
         0.14306    0.02966   -0.00335    0.02614
AFIX  33
H28A  2    1.039667    0.641152    0.861536    11.00000   -1.50000
H28B  2    0.997048    0.686198    0.861599    11.00000   -1.50000
H28C  2    0.996233    0.642791    0.806035    11.00000   -1.50000
AFIX   0
C29   1    0.944258    0.718107    0.593527    11.00000    0.07904    0.08279 =
         0.08108   -0.02947    0.01093    0.00132
C30   1    0.889253    0.736548    0.588680    11.00000    0.07109    0.13805 =
         0.07808   -0.02385    0.00297   -0.00483
AFIX  33
H30A  2    0.888573    0.774514    0.589195    11.00000   -1.50000
H30B  2    0.873928    0.723963    0.548042    11.00000   -1.50000
H30C  2    0.869333    0.723212    0.625638    11.00000   -1.50000
AFIX   0
C31   1    0.975899    0.736070    0.532766    11.00000    0.15453    0.12369 =
         0.07098    0.01485    0.02380    0.03230
AFIX  33
H31A  2    1.011706    0.723787    0.536541    11.00000   -1.50000
H31C  2    0.960183    0.721692    0.493317    11.00000   -1.50000
H31B  2    0.975647    0.773995    0.530345    11.00000   -1.50000
AFIX   0
C32   1    0.946300    0.659345    0.592823    11.00000    0.13232    0.08932 =
         0.10743   -0.00853   -0.01578   -0.02502
AFIX  33
H32B  2    0.982422    0.647909    0.596017    11.00000   -1.50000
H32C  2    0.926601    0.645713    0.629797    11.00000   -1.50000
H32A  2    0.931195    0.646463    0.552201    11.00000   -1.50000
AFIX   0
C33   1    0.939486    0.947371    0.926269    11.00000    0.04877    0.04748 =
         0.08365    0.00519    0.00264   -0.00924
C34   1    0.904421    0.918805    0.911815    11.00000    0.04886    0.04875 =
         0.06644    0.00073    0.00004   -0.01378
C35   1    0.862160    0.884677    0.899130    11.00000    0.04544    0.04573 =
         0.06779   -0.00441   -0.01532   -0.01112
C36   1    0.811246    0.901260    0.906937    11.00000    0.05808    0.07275 =
         0.09040   -0.01379   -0.02278   -0.00554
AFIX  43
H36   2    0.805125    0.934616    0.924904    11.00000   -1.20000
AFIX   0
C37   1    0.769355    0.871178    0.889620    11.00000    0.04523    0.08883 =
         0.11733   -0.00980   -0.00545   -0.01539
C38   1    0.781680    0.819059    0.868721    11.00000    0.05194    0.11228 =
         0.09322   -0.01820   -0.00235   -0.03998
AFIX  43
H38   2    0.753686    0.796144    0.860177    11.00000   -1.20000
AFIX   0
C39   1    0.828999    0.801294    0.860765    11.00000    0.06793    0.07301 =
         0.06045   -0.00356   -0.00671   -0.01764
C40   1    0.871414    0.833640    0.874955    11.00000    0.05788    0.05984 =
         0.04728   -0.00739    0.00537   -0.01114
AFIX  43
H40   2    0.905839    0.821651    0.868520    11.00000   -1.20000
AFIX   0
PART 1
C41   1    0.710181    0.880429    0.889451    21.00000    0.12445    0.15520 =
         0.17500   -0.01188   -0.03631   -0.02387
C65   1    0.705128    0.934993    0.915675    21.00000    0.16425    0.16878 =
         0.17115   -0.01128    0.00072    0.00433
AFIX  33
H65A  2    0.717926    0.936096    0.960518    21.00000   -1.50000
H65B  2    0.725546    0.958722    0.888701    21.00000   -1.50000
H65C  2    0.668641    0.945491    0.914787    21.00000   -1.50000
AFIX   0
C66   1    0.692056    0.871706    0.820224    21.00000    0.12340    0.14155 =
         0.13988    0.00410   -0.00448    0.00451
AFIX  33
H66A  2    0.697108    0.835255    0.808466    21.00000   -1.50000
H66B  2    0.655216    0.880496    0.816761    21.00000   -1.50000
H66C  2    0.712122    0.893727    0.790675    21.00000   -1.50000
AFIX   0
C67   1    0.683087    0.842346    0.935220    21.00000    0.09479    0.25369 =
         0.16585   -0.01028    0.05888   -0.01872
AFIX  33
H67A  2    0.686477    0.807097    0.918014    21.00000   -1.50000
H67B  2    0.699123    0.844154    0.978355    21.00000   -1.50000
H67C  2    0.646305    0.851395    0.938608    21.00000   -1.50000
AFIX   0
PART 2
C41A  1    0.714332    0.892440    0.907890   -21.00000    0.03789    0.05899 =
         0.13927   -0.03496   -0.02829   -0.00842
C65A  1    0.673012    0.853517    0.885633   -21.00000    0.03242    0.09258 =
         0.19494   -0.02313   -0.00515   -0.03018
AFIX  33
H65D  2    0.678478    0.845059    0.839687   -21.00000   -1.50000
H65E  2    0.675656    0.821877    0.911773   -21.00000   -1.50000
H65F  2    0.638519    0.868762    0.891227   -21.00000   -1.50000
AFIX   0
C66A  1    0.705438    0.905517    0.980195   -21.00000    0.06493    0.08280 =
         0.10266   -0.02436    0.02661    0.01024
AFIX  33
H66D  2    0.731726    0.930371    0.994680   -21.00000   -1.50000
H66E  2    0.670899    0.920689    0.985655   -21.00000   -1.50000
H66F  2    0.708036    0.873804    1.006202   -21.00000   -1.50000
AFIX   0
C67A  1    0.708951    0.942734    0.866409   -21.00000    0.05056    0.14492 =
         0.17872   -0.02702   -0.03296    0.02599
AFIX  33
H67D  2    0.735152    0.967944    0.880154   -21.00000   -1.50000
H67E  2    0.713999    0.934364    0.820362   -21.00000   -1.50000
H67F  2    0.674320    0.957501    0.872642   -21.00000   -1.50000
AFIX   0
PART 0
C45   1    0.838260    0.747178    0.831969    11.00000    0.07113    0.05861 =
         0.07107   -0.01309    0.01753   -0.02873
C46   1    0.813481    0.743209    0.770037    11.00000    0.16633    0.07215 =
         0.08527   -0.03340   -0.02957   -0.00737
AFIX  33
H46C  2    0.776901    0.752823    0.774294    11.00000   -1.50000
H46A  2    0.830485    0.766595    0.739146    11.00000   -1.50000
H46B  2    0.816063    0.707488    0.754195    11.00000   -1.50000
AFIX   0
C47   1    0.893499    0.732729    0.825965    11.00000    0.09540    0.07148 =
         0.08854   -0.03554   -0.00016   -0.01181
AFIX  33
H47A  2    0.910298    0.735517    0.868557    11.00000   -1.50000
H47C  2    0.896193    0.696993    0.810203    11.00000   -1.50000
H47B  2    0.910615    0.756100    0.795154    11.00000   -1.50000
AFIX   0
C48   1    0.810143    0.709954    0.879810    11.00000    0.11258    0.07896 =
         0.07331   -0.00890    0.00126   -0.04360
AFIX  33
H48B  2    0.826560    0.712070    0.922697    11.00000   -1.50000
H48C  2    0.773626    0.719975    0.883394    11.00000   -1.50000
H48A  2    0.812519    0.674354    0.863494    11.00000   -1.50000
AFIX   0
C49   1    0.997393    0.816926    0.977637    11.00000    0.07251    0.05501 =
         0.06507   -0.01574   -0.00718    0.00441
C50   1    0.967424    0.788050    0.998274    11.00000    0.05445    0.03627 =
         0.07715   -0.01042    0.00199   -0.00292
C51   1    0.929273    0.750567    1.017412    11.00000    0.07155    0.04857 =
         0.05487   -0.00357    0.00159   -0.01513
C52   1    0.882950    0.766247    1.046581    11.00000    0.07646    0.07598 =
         0.06146   -0.01982    0.00761   -0.01663
AFIX  43
H52   2    0.876799    0.802106    1.053614    11.00000   -1.20000
AFIX   0
C53   1    0.846225    0.730888    1.065238    11.00000    0.09645    0.08372 =
         0.07492   -0.01493   -0.00761   -0.01757
C54   1    0.855994    0.679608    1.055037    11.00000    0.06907    0.11585 =
         0.06494    0.00495    0.00137   -0.02868
AFIX  43
H54   2    0.830265    0.655302    1.067730    11.00000   -1.20000
AFIX   0
C55   1    0.899422    0.661496    1.028354    11.00000    0.10107    0.06254 =
         0.06115    0.01354   -0.02338   -0.02990
C56   1    0.938930    0.697758    1.008530    11.00000    0.08815    0.05254 =
         0.05862   -0.00688    0.00095   -0.00745
AFIX  43
H56   2    0.970563    0.686085    0.989993    11.00000   -1.20000
AFIX   0
C57   1    0.795989    0.752229    1.095310    11.00000    0.08728    0.17407 =
         0.14884   -0.01717    0.03604   -0.04386
C58   1    0.771701    0.792838    1.048158    11.00000    0.12425    0.14513 =
         0.23571    0.03301    0.02713    0.03774
AFIX  33
H58A  2    0.797848    0.818793    1.036607    11.00000   -1.50000
H58B  2    0.759616    0.775336    1.008682    11.00000   -1.50000
H58C  2    0.742375    0.809908    1.069552    11.00000   -1.50000
AFIX   0
C59   1    0.808376    0.784679    1.157898    11.00000    0.15652    0.19761 =
         0.15970   -0.05397    0.07138    0.01182
AFIX  33
H59A  2    0.833419    0.811924    1.147207    11.00000   -1.50000
H59B  2    0.776422    0.800495    1.174300    11.00000   -1.50000
H59C  2    0.823025    0.761892    1.191292    11.00000   -1.50000
AFIX   0
C60   1    0.757440    0.711154    1.114853    11.00000    0.15211    0.14541 =
         0.15365   -0.01727    0.01213   -0.01494
AFIX  33
H60A  2    0.726647    0.727677    1.133498    11.00000   -1.50000
H60B  2    0.747457    0.690929    1.076516    11.00000   -1.50000
H60C  2    0.773170    0.688168    1.147242    11.00000   -1.50000
AFIX   0
C61   1    0.913511    0.602735    1.015939    11.00000    0.14318    0.04988 =
         0.09532    0.00292   -0.00332   -0.02667
C62   1    0.907466    0.594530    0.939216    11.00000    0.15801    0.09522 =
         0.12219   -0.01396    0.01015   -0.02514
AFIX  33
H62C  2    0.872772    0.605491    0.925571    11.00000   -1.50000
H62A  2    0.933571    0.615256    0.916384    11.00000   -1.50000
H62B  2    0.912353    0.557818    0.928688    11.00000   -1.50000
AFIX   0
C63   1    0.870679    0.568485    1.047985    11.00000    0.17319    0.08884 =
         0.13760    0.02338   -0.01036   -0.05925
AFIX  33
H63B  2    0.836514    0.579870    1.032868    11.00000   -1.50000
H63A  2    0.876063    0.532166    1.035821    11.00000   -1.50000
H63C  2    0.872575    0.571920    1.095382    11.00000   -1.50000
AFIX   0
C64   1    0.963290    0.587192    1.036865    11.00000    0.14757    0.05854 =
         0.24503    0.00108    0.00680   -0.00686
AFIX  33
H64A  2    0.989569    0.609128    1.016235    11.00000   -1.50000
H64B  2    0.965670    0.590711    1.084218    11.00000   -1.50000
H64C  2    0.969158    0.550957    1.024657    11.00000   -1.50000
AFIX   0
HKLF 4 1 1 -1 -1 0 1 -1 1 0 0

REM  zrAg_4_P45_2 in I-4
REM R1 =  0.0681 for   10690 Fo > 4sig(Fo)  and  0.0912 for all   14097 data
REM    651 parameters refined using    179 restraints

END

WGHT      0.1408     23.5586

REM No hydrogen bonds found for HTAB generation

REM Highest difference peak  2.386,  deepest hole -1.157,  1-sigma level  0.127
Q1    1   1.0422  0.9254  0.8105  11.00000  0.05    2.39
Q2    1   1.0793  0.8759  0.9276  11.00000  0.05    1.51
Q3    1   0.9776  0.8880  0.9998  11.00000  0.05    1.22
Q4    1   1.0571  0.9621  0.8301  11.00000  0.05    1.20
Q5    1   1.1881  1.0284  0.7071  11.00000  0.05    0.97
Q6    1   0.9790  0.9989  1.0960  11.00000  0.05    0.80
Q7    1   0.9946  1.0327  0.7094  11.00000  0.05    0.73
Q8    1   0.9827  0.8972  1.0480  11.00000  0.05    0.72
Q9    1   1.0000  1.0000  1.0000  10.25000  0.05    0.65
Q10   1   0.9705  0.8806  0.8290  11.00000  0.05    0.61
;
_shelx_res_checksum   36884

_shelx_hkl_file
;
  -2   0   0    1.84    0.15
  -2   0   0    1.52    0.16
  -2   0   0    1.69    0.17
  -2   0   0    1.41    0.15
   2   0   0    1.50    0.17
   2   0   0    1.21    0.16
   2   0   0    1.36    0.16
   2   0   0    1.51    0.14
  -3   0   0   64.54    2.21
  -3   0   0   67.58    2.23
  -3   0   0   63.08    2.24
  -3   0   0   57.64    2.34
   3   0   0   65.24    2.22
   3   0   0   59.08    2.34
   3   0   0   69.07    2.22
  -4   0   0   82.55    2.99
  -4   0   0   88.57    2.95
  -4   0   0   91.49    2.97
  -4   0   0   75.86    3.12
   4   0   0   81.19    2.99
   4   0   0   87.87    2.96
   4   0   0   86.50    2.95
  -5   0   0  132.74    4.48
  -5   0   0  120.55    4.77
  -5   0   0  127.28    4.53
  -5   0   0  135.28    4.49
   5   0   0  130.77    4.55
   5   0   0  134.92    4.48
   5   0   0  134.31    4.49
  -6   0   0   83.74    3.00
  -6   0   0   82.44    2.99
  -6   0   0   83.93    3.04
  -6   0   0   82.74    3.15
   6   0   0   81.30    3.03
   6   0   0   81.51    2.99
   6   0   0   84.17    3.01
  -7   0   0   30.66    1.39
  -7   0   0   30.72    1.35
  -7   0   0   28.60    1.35
  -7   0   0   30.41    1.38
   7   0   0   30.54    1.40
   7   0   0   28.59    1.33
   7   0   0   29.82    1.36
  -8   0   0  122.24    4.35
  -8   0   0  118.83    4.40
  -8   0   0  122.57    4.37
  -8   0   0  119.95    4.57
   8   0   0  119.18    4.42
   8   0   0  121.01    4.36
   8   0   0  125.05    4.36
  -9   0   0  116.65    4.21
  -9   0   0  112.91    4.37
  -9   0   0  116.84    4.26
  -9   0   0  113.44    4.18
   9   0   0  116.92    4.21
   9   0   0  113.55    4.25
   9   0   0  110.29    4.16
 -10   0   0    5.35    0.68
 -10   0   0    6.33    0.82
 -10   0   0    6.35    0.79
 -10   0   0    5.99    0.81
  10   0   0    7.04    0.83
  10   0   0    7.13    0.85
  10   0   0    6.82    0.85
 -11   0   0   29.19    1.68
 -11   0   0   31.66    1.67
 -11   0   0   32.05    1.68
 -11   0   0   34.81    1.66
  11   0   0   29.76    1.67
  11   0   0   33.75    1.77
  11   0   0   29.68    1.71
 -12   0   0   17.69    1.18
 -12   0   0   11.90    1.28
 -12   0   0   15.45    1.31
 -12   0   0   14.48    1.28
  12   0   0   11.69    1.28
  12   0   0   16.32    1.35
  12   0   0   13.11    1.28
  12   0   0   15.38    1.32
 -13   0   0   10.85    1.09
 -13   0   0    7.83    1.10
 -13   0   0    8.08    1.03
 -13   0   0    8.57    1.03
  13   0   0    8.85    1.14
  13   0   0    6.52    1.10
  13   0   0    9.48    1.13
  13   0   0    9.87    1.21
 -14   0   0   11.90    1.28
 -14   0   0   15.26    1.42
 -14   0   0   10.45    1.31
 -14   0   0   12.58    1.42
  14   0   0   10.30    1.32
  14   0   0   13.30    1.57
  14   0   0   13.73    1.48
  14   0   0    8.72    1.18
 -15   0   0   14.41    1.63
 -15   0   0   16.80    1.65
 -15   0   0   16.75    1.66
 -15   0   0   16.17    1.51
  15   0   0   15.69    1.79
  15   0   0   16.09    1.70
  15   0   0   13.58    1.68
  15   0   0   14.64    1.61
 -16   0   0    1.07    1.04
 -16   0   0    0.47    0.83
 -16   0   0    1.17    0.98
 -16   0   0    0.13    1.09
  16   0   0    1.86    1.07
  16   0   0    1.57    1.18
  16   0   0    1.02    1.15
  16   0   0    0.70    1.14
 -17   0   0   -0.92    1.25
 -17   0   0    1.42    1.00
 -17   0   0   -0.30    1.07
 -17   0   0   -0.39    1.14
  17   0   0   -0.12    1.29
  17   0   0   -0.38    1.27
  17   0   0    0.34    1.25
  17   0   0    0.65    1.31
 -18   0   0    0.88    1.37
 -18   0   0   -0.36    1.30
 -18   0   0   -0.08    1.09
 -18   0   0   -3.66    1.40
  18   0   0    1.41    1.61
  18   0   0   -0.79    1.20
  18   0   0    0.86    1.44
 -19   0   0    3.85    1.82
 -19   0   0    4.17    1.48
 -19   0   0    1.83    1.72
 -19   0   0    0.10    1.31
  19   0   0    7.00    1.81
  19   0   0    0.52    1.94
 -20   0   0    1.18    1.85
 -20   0   0    0.89    1.59
 -20   0   0    3.05    1.64
  20   0   0   -1.94    2.34
  20   0   0    4.65    2.07
  19  -1   0    2.31    2.06
  19  -1   0    1.33    1.69
 -19   1   0    1.64    1.43
 -19   1   0    2.41    1.82
 -19   1   0    4.15    1.65
  18  -1   0    0.87    1.67
  18  -1   0   -0.97    1.58
  18  -1   0   -0.88    1.67
  18  -1   0    1.84    1.39
 -18   1   0    0.47    1.32
 -18   1   0    0.70    1.56
 -18   1   0    0.22    1.51
 -18   1   0   -0.42    1.11
  17  -1   0    0.31    1.31
  17  -1   0    1.98    1.34
  17  -1   0    0.67    1.33
 -17   1   0   -1.73    1.23
 -17   1   0   -0.27    0.96
 -17   1   0   -0.09    1.36
 -17   1   0    0.80    1.07
  16  -1   0   -0.16    1.07
  16  -1   0    0.32    1.12
  16  -1   0    0.61    1.04
  16  -1   0    2.59    1.17
 -16   1   0    0.53    1.00
 -16   1   0   -0.85    1.13
 -16   1   0    2.04    0.99
 -16   1   0    2.19    1.20
  15  -1   0   14.04    1.88
  15  -1   0   18.91    1.93
  15  -1   0   16.23    1.69
  15  -1   0   14.60    1.76
 -15   1   0   12.36    1.54
 -15   1   0   17.54    1.63
 -15   1   0   13.21    1.66
 -15   1   0   12.96    1.57
  14  -1   0   18.57    1.80
  14  -1   0   19.21    1.66
  14  -1   0   19.31    1.70
  14  -1   0   18.95    1.59
 -14   1   0   20.48    1.51
 -14   1   0   17.95    1.65
 -14   1   0   16.25    1.55
 -14   1   0   17.03    1.54
  13  -1   0   18.23    1.47
  13  -1   0   13.81    1.41
  13  -1   0   13.24    1.36
 -13   1   0   13.06    1.26
 -13   1   0   14.29    1.39
 -13   1   0   13.96    1.36
 -13   1   0   13.62    1.32
  12  -1   0   23.66    1.61
  12  -1   0   19.18    1.52
  12  -1   0   21.31    1.59
 -12   1   0   18.88    1.51
 -12   1   0   19.03    1.53
 -12   1   0   22.64    1.53
 -12   1   0   23.86    1.42
  11  -1   0   36.60    1.92
  11  -1   0   36.57    2.04
  11  -1   0   38.25    2.01
 -11   1   0   39.46    2.00
 -11   1   0   43.81    1.97
 -11   1   0   44.50    2.04
 -11   1   0   39.90    2.02
  10  -1   0    0.73    0.54
  10  -1   0    0.88    0.51
  10  -1   0    0.91    0.53
 -10   1   0    1.20    0.45
 -10   1   0    0.84    0.55
 -10   1   0    1.70    0.60
 -10   1   0    1.38    0.59
   9  -1   0   29.62    1.54
   9  -1   0   30.93    1.59
   9  -1   0   29.36    1.56
  -9   1   0   32.24    1.57
  -9   1   0   31.38    1.55
  -9   1   0   31.35    1.57
  -9   1   0   31.66    1.51
   8  -1   0   70.80    2.83
   8  -1   0   74.49    2.92
   8  -1   0   73.71    2.85
  -8   1   0   71.89    2.93
  -8   1   0   75.04    2.91
  -8   1   0   76.12    2.87
  -8   1   0   75.36    2.86
   7  -1   0   30.92    1.43
   7  -1   0   31.89    1.48
   7  -1   0   32.14    1.45
   7  -1   0   31.76    1.38
  -7   1   0   30.69    1.42
  -7   1   0   31.11    1.45
  -7   1   0   30.54    1.44
  -7   1   0   32.04    1.41
   6  -1   0   82.88    2.93
   6  -1   0   73.50    3.00
   6  -1   0   79.91    2.96
   6  -1   0   79.47    2.90
  -6   1   0   78.57    3.03
  -6   1   0   78.10    2.94
  -6   1   0   81.49    2.92
  -6   1   0   79.58    2.90
   5  -1   0  244.82    8.11
   5  -1   0  236.56    7.98
   5  -1   0  225.56    8.56
   5  -1   0  243.90    8.00
  -5   1   0  232.70    8.58
  -5   1   0  240.02    7.99
  -5   1   0  244.24    7.99
  -5   1   0  244.39    8.11
   4  -1   0  403.36   13.13
   4  -1   0  371.88   14.18
   4  -1   0  409.91   13.13
   4  -1   0  391.23   13.32
  -4   1   0  407.78   14.21
  -4   1   0  405.09   13.33
  -4   1   0  418.10   13.14
  -4   1   0  395.87   13.12
   3  -1   0   78.17    2.98
   3  -1   0   82.93    2.81
   3  -1   0   79.52    2.80
   3  -1   0   80.83    2.85
  -3   1   0   83.49    2.82
  -3   1   0   83.16    2.81
  -3   1   0   82.41    2.99
  -3   1   0   81.23    2.85
   2  -1   0   20.25    0.78
   2  -1   0   20.92    0.77
   2  -1   0   18.53    0.76
   2  -1   0   21.36    0.78
  -2   1   0   16.84    0.75
  -2   1   0   17.42    0.75
  -2   1   0   17.59    0.77
  -2   1   0   19.15    0.77
  -2  -1   0   34.50    1.20
  -2  -1   0   32.98    1.21
  -2  -1   0   33.69    1.23
   2   1   0   35.76    1.21
  -3  -1   0   57.25    1.85
  -3  -1   0   54.64    1.87
  -3  -1   0   54.79    1.84
   3   1   0   49.66    1.88
   3   1   0   51.24    1.83
   3   1   0   47.95    1.85
   3   1   0   50.44    1.83
  -4  -1   0   36.89    1.43
  -4  -1   0   37.41    1.42
  -4  -1   0   36.87    1.41
   4   1   0   36.39    1.44
   4   1   0   38.82    1.46
   4   1   0   38.44    1.43
   4   1   0   39.25    1.42
  -5  -1   0   99.48    3.39
  -5  -1   0   95.51    3.43
  -5  -1   0   99.21    3.39
  -5  -1   0   89.23    3.59
   5   1   0  100.41    3.40
   5   1   0   95.74    3.43
   5   1   0  100.72    3.39
   5   1   0   99.36    3.49
  -6  -1   0  225.46    7.39
  -6  -1   0  211.02    7.94
  -6  -1   0  233.12    7.42
  -6  -1   0  223.27    7.51
   6   1   0  220.24    7.63
   6   1   0  213.10    7.38
   6   1   0  222.92    7.41
   6   1   0  213.59    7.50
  -7  -1   0   26.56    1.26
  -7  -1   0   27.29    1.26
  -7  -1   0   28.42    1.26
  -7  -1   0   26.81    1.26
   7   1   0   26.29    1.26
   7   1   0   27.31    1.27
   7   1   0   27.80    1.27
   7   1   0   28.04    1.29
  -8  -1   0   56.56    2.26
  -8  -1   0   55.95    2.24
  -8  -1   0   58.02    2.31
  -8  -1   0   53.82    2.24
   8   1   0   56.82    2.29
   8   1   0   55.04    2.24
   8   1   0   56.07    2.28
   8   1   0   55.54    2.25
  -9  -1   0   84.98    3.28
  -9  -1   0   83.81    3.40
  -9  -1   0   88.29    3.30
  -9  -1   0   87.12    3.31
   9   1   0   88.39    3.28
   9   1   0   86.52    3.29
   9   1   0   88.22    3.34
   9   1   0   86.29    3.35
 -10  -1   0   11.21    0.87
 -10  -1   0   11.98    0.99
 -10  -1   0   13.22    0.97
 -10  -1   0   12.02    0.98
  10   1   0   12.48    0.98
  10   1   0   13.54    1.03
  10   1   0   12.57    0.99
  10   1   0   14.12    1.04
 -11  -1   0   17.39    1.23
 -11  -1   0   17.83    1.32
 -11  -1   0   17.09    1.21
 -11  -1   0   18.11    1.15
  11   1   0   18.48    1.26
  11   1   0   18.96    1.29
  11   1   0   19.65    1.28
  11   1   0   18.33    1.27
 -12  -1   0    4.71    0.80
 -12  -1   0    5.46    0.76
 -12  -1   0    5.16    0.81
 -12  -1   0    4.51    0.80
  12   1   0    5.89    0.93
  12   1   0    4.77    0.86
  12   1   0    5.26    0.82
  12   1   0    5.85    0.86
 -13  -1   0   -0.68    0.59
 -13  -1   0    0.53    0.68
 -13  -1   0   -0.98    0.63
 -13  -1   0    0.26    0.55
  13   1   0   -0.62    0.64
  13   1   0   -1.29    0.66
  13   1   0   -0.75    0.66
  13   1   0   -0.71    0.64
 -14  -1   0    3.73    0.80
 -14  -1   0    3.91    0.92
 -14  -1   0    3.60    0.90
 -14  -1   0    3.03    0.88
  14   1   0    4.35    0.97
  14   1   0    3.65    0.96
  14   1   0    4.04    0.95
  14   1   0    3.07    0.90
 -15  -1   0   10.07    1.26
 -15  -1   0    4.72    1.11
 -15  -1   0    7.51    1.01
 -15  -1   0    6.06    1.03
  15   1   0    6.90    1.05
  15   1   0    5.70    1.16
  15   1   0    6.57    1.10
  15   1   0    7.27    1.22
 -16  -1   0    0.77    0.99
 -16  -1   0    0.68    0.95
 -16  -1   0    1.16    0.99
 -16  -1   0   -0.34    0.77
  16   1   0    0.97    1.11
  16   1   0    0.45    1.00
  16   1   0    0.11    1.00
  16   1   0   -0.14    0.96
 -17  -1   0   -0.55    1.11
 -17  -1   0    0.40    1.02
 -17  -1   0    0.60    0.94
 -17  -1   0   -1.39    1.11
  17   1   0    1.15    1.16
  17   1   0    1.35    1.27
  17   1   0    2.05    1.25
  17   1   0    0.82    1.10
 -18  -1   0   -2.91    1.26
 -18  -1   0   -0.11    1.19
 -18  -1   0   -0.51    1.35
 -18  -1   0   -1.63    0.99
  18   1   0   -1.93    1.40
  18   1   0   -0.41    1.42
  18   1   0    0.35    1.27
 -19  -1   0   -1.95    1.47
 -19  -1   0    1.25    1.66
 -19  -1   0    0.78    1.41
 -19  -1   0    1.52    1.18
  19   1   0    4.81    1.58
  19   1   0   -2.06    1.81
  19   1   0    3.24    1.66
 -20  -1   0   -2.31    1.58
 -20  -1   0    1.43    1.54
 -20  -1   0   -2.88    1.87
  20   1   0   -0.41    2.03
  20   1   0    1.17    1.80
  19  -2   0    0.54    1.69
  19  -2   0   -2.38    2.13
 -19   2   0    1.66    1.73
 -19   2   0    0.74    1.59
 -19   2   0    0.80    1.48
  18  -2   0   -0.48    1.77
  18  -2   0    1.38    1.51
  18  -2   0    3.83    1.79
 -18   2   0    2.19    1.70
 -18   2   0    0.45    1.56
 -18   2   0    0.45    1.18
 -18   2   0   -0.03    1.34
  17  -2   0   -0.58    1.20
  17  -2   0    0.83    1.39
  17  -2   0    1.84    1.45
 -17   2   0    1.06    1.09
 -17   2   0   -0.67    1.34
 -17   2   0    1.92    1.36
 -17   2   0    0.87    1.15
  16  -2   0    0.31    1.22
  16  -2   0    2.37    1.33
  16  -2   0    0.56    1.22
  16  -2   0    0.88    1.02
 -16   2   0   -0.84    0.91
 -16   2   0   -0.72    1.20
 -16   2   0   -2.07    1.08
 -16   2   0    0.76    1.06
  15  -2   0    8.01    1.42
  15  -2   0    6.09    1.26
  15  -2   0   10.44    1.38
  15  -2   0    8.76    1.31
 -15   2   0    8.87    1.15
 -15   2   0    7.24    1.13
 -15   2   0    8.71    1.39
 -15   2   0    5.10    1.14
  14  -2   0   13.85    1.55
  14  -2   0   14.47    1.72
  14  -2   0   14.95    1.68
 -14   2   0   13.56    1.64
 -14   2   0   14.82    1.47
 -14   2   0   11.85    1.45
 -14   2   0   17.77    1.66
  13  -2   0    0.48    0.83
  13  -2   0    1.52    0.81
  13  -2   0    1.58    0.86
 -13   2   0    1.66    0.76
 -13   2   0    2.19    0.78
 -13   2   0    2.27    0.68
 -13   2   0    0.46    0.77
  12  -2   0   33.93    1.94
  12  -2   0   36.08    2.04
  12  -2   0   31.30    1.94
 -12   2   0   31.56    1.94
 -12   2   0   35.54    1.97
 -12   2   0   34.31    1.92
 -12   2   0   38.39    1.90
  11  -2   0   64.49    2.84
  11  -2   0   65.48    2.84
  11  -2   0   64.72    2.81
 -11   2   0   53.57    2.72
 -11   2   0   68.49    2.80
 -11   2   0   65.63    2.83
 -11   2   0   64.70    2.81
  10  -2   0   29.38    1.60
  10  -2   0   28.89    1.61
  10  -2   0   29.43    1.64
 -10   2   0   27.50    1.49
 -10   2   0   28.29    1.55
 -10   2   0   28.84    1.61
 -10   2   0   27.24    1.56
   9  -2   0   78.57    3.20
   9  -2   0   85.45    3.27
   9  -2   0   79.64    3.19
  -9   2   0   80.73    3.22
  -9   2   0   82.99    3.19
  -9   2   0   82.39    3.26
  -9   2   0   81.11    3.21
   8  -2   0    3.01    0.55
   8  -2   0    2.95    0.56
   8  -2   0    3.29    0.46
   8  -2   0    3.89    0.64
  -8   2   0    3.37    0.58
  -8   2   0    4.23    0.52
  -8   2   0    3.56    0.58
  -8   2   0    2.70    0.52
   7  -2   0    8.69    0.76
   7  -2   0    8.69    0.73
   7  -2   0    8.08    0.81
   7  -2   0    9.58    0.65
  -7   2   0    8.14    0.74
  -7   2   0    7.44    0.74
  -7   2   0    7.82    0.78
  -7   2   0    9.05    0.69
   6  -2   0   23.71    1.10
   6  -2   0   21.77    1.12
   6  -2   0   22.56    1.17
   6  -2   0   24.13    1.20
  -6   2   0   24.10    1.17
  -6   2   0   24.10    1.18
  -6   2   0   24.41    1.13
  -6   2   0   25.34    1.20
   5  -2   0  201.78    6.79
   5  -2   0  195.72    6.79
   5  -2   0  193.70    7.25
   5  -2   0  197.30    6.89
  -5   2   0  206.28    7.27
  -5   2   0  203.79    6.79
  -5   2   0  203.40    6.89
  -5   2   0  205.34    6.80
   4  -2   0  277.85   10.39
   4  -2   0  292.16    9.65
   4  -2   0  293.94    9.81
   4  -2   0  288.57    9.65
  -4   2   0  289.71    9.80
  -4   2   0  293.85   10.41
  -4   2   0  298.72    9.65
  -4   2   0  296.67    9.66
   3  -2   0   71.68    2.52
   3  -2   0   73.58    2.47
   3  -2   0   67.75    2.46
   3  -2   0   66.73    2.59
  -3   2   0   69.13    2.46
  -3   2   0   70.32    2.60
  -3   2   0   72.34    2.52
  -3   2   0   66.44    2.46
   2  -2   0   87.19    3.13
   2  -2   0   89.03    3.07
   2  -2   0   82.76    3.28
   2  -2   0   94.16    3.08
  -2   2   0   93.24    3.08
  -2   2   0   89.36    3.29
  -2   2   0   97.07    3.09
   1  -2   0   63.19    2.19
   1  -2   0   62.29    2.35
  -1   2   0   65.05    2.20
  -1   2   0   67.66    2.20
  -1   2   0   63.53    2.35
   0  -2   0  180.96    6.06
   0   2   0  176.58    6.36
  -2  -2   0    1.25    0.15
  -2  -2   0    1.50    0.17
  -2  -2   0    1.31    0.14
  -2  -2   0    1.67    0.16
   2   2   0    1.68    0.17
   2   2   0    1.49    0.15
   2   2   0    1.27    0.16
   2   2   0    1.24    0.16
  -3  -2   0   34.41    1.25
  -3  -2   0   33.67    1.24
  -3  -2   0   33.78    1.27
  -3  -2   0   33.82    1.29
   3   2   0   34.26    1.27
   3   2   0   34.15    1.29
   3   2   0   35.04    1.25
   3   2   0   34.96    1.25
  -4  -2   0   46.54    1.66
  -4  -2   0   47.79    1.61
  -4  -2   0   46.40    1.64
  -4  -2   0   48.52    1.62
   4   2   0   39.75    1.64
   4   2   0   38.37    1.61
   4   2   0   39.81    1.59
  -5  -2   0   82.82    2.97
  -5  -2   0   86.05    3.06
  -5  -2   0   88.54    2.99
  -5  -2   0   88.28    3.03
   5   2   0   85.44    2.97
   5   2   0   86.21    2.99
   5   2   0   82.98    3.06
   5   2   0   80.55    3.01
  -6  -2   0  171.86    5.53
  -6  -2   0  165.19    5.52
  -6  -2   0  163.99    5.60
   6   2   0  155.85    5.68
   6   2   0  158.71    5.59
   6   2   0  162.09    5.51
   6   2   0  158.74    5.52
  -7  -2   0   89.20    3.46
  -7  -2   0   92.07    3.33
  -7  -2   0   91.39    3.28
  -7  -2   0   93.84    3.30
   7   2   0   89.57    3.33
   7   2   0   91.65    3.28
   7   2   0   90.43    3.37
   7   2   0   90.64    3.29
  -8  -2   0   76.07    2.96
  -8  -2   0   73.36    2.81
  -8  -2   0   78.66    2.85
  -8  -2   0   75.08    2.86
   8   2   0   73.00    2.86
   8   2   0   76.56    2.84
   8   2   0   73.39    2.82
   8   2   0   73.55    2.89
  -9  -2   0   45.29    1.98
  -9  -2   0   45.69    2.00
  -9  -2   0   48.21    2.02
  -9  -2   0   48.84    2.02
   9   2   0   46.55    2.01
   9   2   0   47.35    2.04
   9   2   0   46.25    2.03
   9   2   0   47.86    2.00
 -10  -2   0   26.29    1.42
 -10  -2   0   26.34    1.40
 -10  -2   0   28.34    1.40
 -10  -2   0   28.15    1.42
  10   2   0   27.14    1.44
  10   2   0   26.42    1.41
  10   2   0   28.66    1.45
  10   2   0   26.35    1.42
 -11  -2   0    7.02    0.83
 -11  -2   0    5.62    0.68
 -11  -2   0    7.86    0.87
 -11  -2   0    5.57    0.70
  11   2   0    5.70    0.77
  11   2   0    6.81    0.86
  11   2   0    6.81    0.79
  11   2   0    5.48    0.74
 -12  -2   0   -0.12    0.54
 -12  -2   0    0.65    0.57
 -12  -2   0   -0.34    0.48
 -12  -2   0   -0.39    0.43
  12   2   0    0.42    0.58
  12   2   0   -0.53    0.54
  12   2   0    0.46    0.56
  12   2   0    0.28    0.55
 -13  -2   0    4.07    0.85
 -13  -2   0    5.42    0.81
 -13  -2   0    6.27    0.96
 -13  -2   0    5.14    0.86
  13   2   0    6.09    0.99
  13   2   0    5.52    0.95
  13   2   0    6.83    0.92
  13   2   0    6.36    0.96
 -14  -2   0    4.08    0.88
 -14  -2   0    2.80    0.75
 -14  -2   0    0.98    0.69
 -14  -2   0    2.39    0.79
  14   2   0    1.93    0.80
  14   2   0    3.74    0.95
  14   2   0    2.73    0.86
  14   2   0    2.80    0.77
 -15  -2   0    1.66    0.94
 -15  -2   0    2.54    0.94
 -15  -2   0    2.08    0.91
 -15  -2   0    2.23    0.81
  15   2   0    2.12    1.03
  15   2   0    1.36    0.96
  15   2   0    2.33    0.86
  15   2   0    0.51    0.78
 -16  -2   0    1.80    0.92
 -16  -2   0    1.94    1.09
 -16  -2   0    1.84    0.84
 -16  -2   0    2.68    0.84
  16   2   0    2.13    1.02
  16   2   0    3.11    0.99
  16   2   0    4.94    1.14
  16   2   0    2.35    1.21
 -17  -2   0   -0.69    0.93
 -17  -2   0    0.18    1.05
 -17  -2   0    1.79    1.22
 -17  -2   0    0.61    0.87
  17   2   0    2.18    1.16
  17   2   0    0.83    1.23
  17   2   0   -0.49    1.16
  17   2   0   -0.51    1.09
 -18  -2   0    0.89    1.16
 -18  -2   0    1.18    1.21
 -18  -2   0    2.21    1.05
 -18  -2   0    1.92    1.40
  18   2   0    1.86    1.38
  18   2   0    1.78    1.26
  18   2   0    0.32    1.37
 -19  -2   0   -1.15    1.40
 -19  -2   0   -0.43    1.19
 -19  -2   0    0.18    1.50
 -19  -2   0   -0.45    1.35
  19   2   0    0.82    1.44
  19   2   0    0.49    1.65
  19   2   0    0.73    1.45
  19   2   0    1.60    1.59
 -20  -2   0   -4.14    1.52
 -20  -2   0   -0.59    1.92
 -20  -2   0   -0.98    1.46
 -20  -2   0   -0.16    1.32
  20   2   0   -1.05    1.69
  20   2   0    2.89    2.08
  18  -3   0    0.75    1.61
  18  -3   0   -2.40    1.88
 -18   3   0    2.64    1.56
 -18   3   0   -1.20    1.53
 -18   3   0    0.78    1.29
  17  -3   0   -0.50    1.53
  17  -3   0   -0.82    1.59
  17  -3   0   -1.57    1.26
  17  -3   0   -0.78    1.53
 -17   3   0   -0.14    1.08
 -17   3   0    0.29    1.37
 -17   3   0    1.29    1.43
 -17   3   0   -0.08    1.33
  16  -3   0    0.57    1.11
  16  -3   0   -2.91    1.23
  16  -3   0    1.39    1.42
 -16   3   0   -0.96    1.34
 -16   3   0   -0.45    1.11
 -16   3   0    1.43    1.01
 -16   3   0    0.17    1.23
  15  -3   0    3.00    1.15
  15  -3   0    0.77    1.14
  15  -3   0    2.17    1.24
 -15   3   0    2.42    1.29
 -15   3   0    2.23    0.93
 -15   3   0    1.92    1.13
 -15   3   0    4.04    1.11
  14  -3   0   10.40    1.46
  14  -3   0    8.47    1.31
  14  -3   0    8.24    1.40
 -14   3   0    8.74    1.36
 -14   3   0   10.60    1.42
 -14   3   0    7.71    1.18
 -14   3   0    8.24    1.24
  13  -3   0    8.57    1.27
  13  -3   0   11.92    1.36
  13  -3   0    9.86    1.23
 -13   3   0   14.17    1.45
 -13   3   0   12.76    1.33
 -13   3   0   12.15    1.46
 -13   3   0   10.63    1.30
  12  -3   0    8.56    1.17
  12  -3   0   10.99    1.24
  12  -3   0   10.24    1.26
 -12   3   0    8.52    1.08
 -12   3   0    9.77    1.22
 -12   3   0    7.69    1.05
 -12   3   0    5.98    0.97
  11  -3   0   27.55    1.79
  11  -3   0   22.71    1.71
  11  -3   0   31.86    1.75
 -11   3   0   30.25    1.82
 -11   3   0   30.06    1.74
 -11   3   0   28.26    1.76
 -11   3   0   29.24    1.61
  10  -3   0   53.42    2.36
  10  -3   0   41.47    2.29
  10  -3   0   51.72    2.33
  10  -3   0   47.56    2.19
 -10   3   0   52.29    2.30
 -10   3   0   51.26    2.27
 -10   3   0   51.28    2.35
 -10   3   0   52.47    2.37
   9  -3   0  113.74    4.45
   9  -3   0  118.78    4.45
   9  -3   0  115.13    4.57
   9  -3   0  120.02    4.55
  -9   3   0  118.89    4.44
  -9   3   0  120.74    4.61
  -9   3   0  123.71    4.53
  -9   3   0  125.36    4.50
   8  -3   0   51.74    2.26
   8  -3   0   49.23    2.16
   8  -3   0   50.59    2.20
   8  -3   0   52.88    2.24
  -8   3   0   52.00    2.23
  -8   3   0   51.98    2.20
  -8   3   0   53.18    2.24
  -8   3   0   52.72    2.20
   7  -3   0   22.18    1.23
   7  -3   0   23.75    1.25
   7  -3   0   24.26    1.31
   7  -3   0   23.04    1.15
  -7   3   0   24.42    1.19
  -7   3   0   24.34    1.22
  -7   3   0   23.66    1.28
  -7   3   0   24.38    1.28
   6  -3   0   66.19    2.68
   6  -3   0   66.06    2.67
   6  -3   0   69.94    2.63
   6  -3   0   64.60    2.61
  -6   3   0   69.34    2.66
  -6   3   0   70.94    2.65
  -6   3   0   71.72    2.71
  -6   3   0   69.58    2.62
   5  -3   0   23.64    1.16
   5  -3   0   21.30    1.04
   5  -3   0   23.52    1.11
   5  -3   0   23.38    1.09
  -5   3   0   20.28    1.05
  -5   3   0   20.60    1.07
  -5   3   0   23.30    1.12
  -5   3   0   23.03    1.12
   4  -3   0  153.14    5.16
   4  -3   0  153.03    5.50
   4  -3   0  144.42    5.15
   4  -3   0  154.84    5.27
  -4   3   0  151.28    5.25
  -4   3   0  151.22    5.50
  -4   3   0  146.47    5.15
  -4   3   0  153.44    5.17
   3  -3   0   74.66    2.67
   3  -3   0   74.35    2.61
   3  -3   0   75.01    2.62
   3  -3   0   70.93    2.74
  -3   3   0   71.22    2.60
  -3   3   0   74.25    2.62
  -3   3   0   72.60    2.75
   2  -3   0  187.05    6.92
   2  -3   0  195.36    6.42
   2  -3   0  192.72    6.53
  -2   3   0  195.21    6.42
  -2   3   0  200.21    6.43
  -2   3   0  188.94    6.92
   1  -3   0   94.00    3.42
   1  -3   0   98.90    3.31
   1  -3   0   89.21    3.55
  -1   3   0  108.14    3.32
  -1   3   0   98.67    3.56
   0  -3   0   41.24    1.45
   0  -3   0   41.61    1.51
   0  -3   0   38.66    1.55
   0   3   0   40.01    1.56
   0   3   0   40.52    1.51
   0   3   0   44.01    1.45
  -1  -3   0  176.79    5.89
  -1  -3   0  172.88    5.66
   1   3   0  164.40    5.88
   1   3   0  176.01    5.66
  -2  -3   0  203.62    6.82
  -2  -3   0  204.02    6.94
  -2  -3   0  211.27    6.82
   2   3   0  212.21    6.82
   2   3   0  210.42    6.82
  -3  -3   0   66.97    2.38
  -3  -3   0   63.93    2.31
  -3  -3   0   70.90    2.29
  -3  -3   0   67.26    2.28
   3   3   0   63.54    2.37
   3   3   0   66.98    2.27
   3   3   0   62.89    2.31
   3   3   0   66.13    2.28
  -4  -3   0  182.14    6.44
  -4  -3   0  191.52    6.35
  -4  -3   0  191.12    6.34
  -4  -3   0  189.25    6.58
   4   3   0  198.20    6.35
   4   3   0  198.60    6.35
   4   3   0  192.64    6.58
   4   3   0  187.30    6.44
  -5  -3   0   73.83    2.67
  -5  -3   0   73.79    2.62
  -5  -3   0   74.07    2.72
  -5  -3   0   76.99    2.64
   5   3   0   71.69    2.67
   5   3   0   74.62    2.64
   5   3   0   75.43    2.63
   5   3   0   74.98    2.72
  -6  -3   0   45.68    1.82
  -6  -3   0   47.09    1.84
  -6  -3   0   47.76    1.79
  -6  -3   0   48.26    1.80
   6   3   0   45.46    1.84
   6   3   0   46.88    1.79
   6   3   0   45.08    1.81
   6   3   0   47.53    1.80
  -7  -3   0   41.05    1.73
  -7  -3   0   41.23    1.75
  -7  -3   0   43.58    1.74
   7   3   0   43.58    1.78
   7   3   0   43.66    1.74
   7   3   0   42.25    1.77
   7   3   0   46.03    1.74
  -8  -3   0   54.10    2.11
  -8  -3   0   53.11    2.13
  -8  -3   0   52.66    2.10
   8   3   0   53.39    2.12
   8   3   0   53.09    2.16
   8   3   0   50.17    2.09
   8   3   0   52.73    2.14
  -9  -3   0   20.26    1.16
  -9  -3   0   19.36    1.18
  -9  -3   0   20.22    1.13
  -9  -3   0   22.05    1.19
   9   3   0   23.04    1.21
   9   3   0   21.80    1.18
   9   3   0   21.17    1.21
   9   3   0   23.19    1.23
 -10  -3   0   10.86    0.90
 -10  -3   0   11.45    0.91
 -10  -3   0    9.78    0.88
 -10  -3   0   11.56    0.82
  10   3   0   11.58    0.98
  10   3   0   11.89    0.92
  10   3   0   11.15    0.94
  10   3   0   11.51    0.92
 -11  -3   0    6.11    0.77
 -11  -3   0    4.51    0.66
 -11  -3   0    5.68    0.70
 -11  -3   0    5.93    0.74
  11   3   0    5.50    0.74
  11   3   0    6.69    0.86
  11   3   0    6.32    0.81
  11   3   0    6.65    0.80
 -12  -3   0    7.55    0.87
 -12  -3   0    6.78    0.83
 -12  -3   0    8.20    0.94
 -12  -3   0    7.61    0.95
  12   3   0    6.96    0.88
  12   3   0    8.16    1.00
  12   3   0    6.25    0.83
  12   3   0    6.48    0.83
 -13  -3   0   10.47    1.14
 -13  -3   0   13.50    1.25
 -13  -3   0    9.88    1.09
 -13  -3   0   10.05    1.12
  13   3   0   11.56    1.21
  13   3   0   10.78    1.12
  13   3   0   11.51    1.27
  13   3   0    9.87    1.18
 -14  -3   0    5.23    0.90
 -14  -3   0    7.35    0.92
 -14  -3   0    8.70    1.13
 -14  -3   0    5.37    0.94
  14   3   0    6.07    1.06
  14   3   0    6.09    0.96
  14   3   0    4.05    0.90
  14   3   0    5.64    0.98
 -15  -3   0    2.90    0.74
 -15  -3   0    2.67    0.91
 -15  -3   0    1.98    0.81
 -15  -3   0    1.78    0.93
  15   3   0    3.34    0.96
  15   3   0    1.02    0.78
  15   3   0    2.04    0.82
  15   3   0    2.49    0.96
 -16  -3   0    5.65    0.99
 -16  -3   0    5.14    1.04
 -16  -3   0    5.64    1.05
 -16  -3   0    6.19    1.24
  16   3   0    6.71    1.04
  16   3   0    7.47    1.26
  16   3   0    6.02    1.24
  16   3   0    4.96    1.08
 -17  -3   0    2.34    1.07
 -17  -3   0    2.56    0.95
 -17  -3   0    1.02    0.86
 -17  -3   0    0.10    1.19
  17   3   0    2.64    1.19
  17   3   0    0.57    1.11
  17   3   0    1.49    1.14
  17   3   0    1.56    1.08
 -18  -3   0    2.37    1.37
 -18  -3   0    1.85    1.22
 -18  -3   0    3.31    1.17
 -18  -3   0    3.64    1.21
  18   3   0    2.25    1.43
  18   3   0    3.20    1.36
  18   3   0    4.34    1.45
  18   3   0    2.14    1.37
 -19  -3   0    0.44    1.47
 -19  -3   0    0.17    1.12
 -19  -3   0    0.14    1.30
 -19  -3   0    1.05    1.33
  19   3   0    2.18    1.51
  19   3   0   -0.20    1.51
  19   3   0    0.79    1.57
  19   3   0    2.84    1.53
 -20  -3   0    2.16    1.38
 -20  -3   0   -0.21    1.45
 -20  -3   0   -0.05    1.36
 -20  -3   0    0.83    1.75
  20   3   0   -0.30    1.96
  20   3   0    1.11    1.65
 -21  -3   0   -2.86    1.76
 -21  -3   0   -2.09    1.45
 -21  -3   0   -3.99    1.66
  21   3   0    3.60    2.05
  21   3   0    0.21    2.32
  18  -4   0   -0.97    2.06
  18  -4   0    2.10    1.66
 -18   4   0   -0.99    1.48
 -18   4   0    0.55    1.77
  17  -4   0    1.92    1.70
  17  -4   0   -0.15    1.27
  17  -4   0    0.70    1.72
 -17   4   0    0.25    1.51
 -17   4   0    0.87    1.18
  16  -4   0   -0.91    1.34
  16  -4   0    1.74    1.27
  16  -4   0   -1.87    1.41
 -16   4   0    1.11    1.31
 -16   4   0   -0.24    1.32
 -16   4   0    1.45    1.05
  15  -4   0    0.62    1.08
  15  -4   0    1.35    1.21
  15  -4   0    0.03    1.25
 -15   4   0    2.01    0.90
 -15   4   0   -1.75    1.10
 -15   4   0   -1.11    1.05
  14  -4   0    8.12    1.35
  14  -4   0    6.77    1.16
  14  -4   0    6.15    1.25
 -14   4   0    8.19    1.32
 -14   4   0    8.54    1.14
 -14   4   0    8.18    1.43
 -14   4   0    6.04    1.11
  13  -4   0   15.70    1.65
  13  -4   0   17.18    1.66
  13  -4   0   13.49    1.63
 -13   4   0   18.10    1.69
 -13   4   0   15.39    1.46
 -13   4   0   13.56    1.52
 -13   4   0   18.22    1.80
  12  -4   0    6.33    1.04
  12  -4   0    7.33    1.08
  12  -4   0    4.28    1.02
 -12   4   0    8.51    1.19
 -12   4   0    7.00    1.07
 -12   4   0    7.21    0.93
 -12   4   0    6.87    1.11
  11  -4   0    1.70    0.82
  11  -4   0    0.51    0.75
  11  -4   0    1.78    0.74
 -11   4   0    1.24    0.74
 -11   4   0    2.66    0.76
 -11   4   0    1.89    0.75
 -11   4   0    1.45    0.62
  10  -4   0   11.56    1.13
  10  -4   0   10.07    1.19
  10  -4   0   10.55    1.20
  10  -4   0   12.01    0.96
 -10   4   0   10.06    1.17
 -10   4   0   11.25    1.20
 -10   4   0    9.91    1.05
 -10   4   0    8.95    0.98
   9  -4   0   80.51    3.27
   9  -4   0   80.28    3.31
   9  -4   0   80.32    3.24
   9  -4   0   78.05    3.23
  -9   4   0   79.49    3.21
  -9   4   0   82.56    3.28
  -9   4   0   80.57    3.27
  -9   4   0   80.53    3.28
   8  -4   0   84.10    3.32
   8  -4   0   80.15    3.35
   8  -4   0   85.10    3.33
   8  -4   0   88.99    3.42
  -8   4   0   83.95    3.31
  -8   4   0   88.52    3.37
  -8   4   0   86.70    3.41
  -8   4   0   85.67    3.38
   7  -4   0   23.99    1.18
   7  -4   0   24.83    1.38
   7  -4   0   22.36    1.25
   7  -4   0   21.70    1.23
  -7   4   0   24.29    1.25
  -7   4   0   22.71    1.29
  -7   4   0   23.92    1.21
  -7   4   0   24.11    1.31
   6  -4   0   61.87    2.46
   6  -4   0   62.78    2.39
   6  -4   0   55.36    2.36
   6  -4   0   59.81    2.36
  -6   4   0   60.83    2.38
  -6   4   0   56.43    2.38
  -6   4   0   58.78    2.35
   5  -4   0   22.52    1.10
   5  -4   0   22.43    1.18
   5  -4   0   23.95    1.13
   5  -4   0   19.43    1.04
  -5   4   0   24.08    1.16
  -5   4   0   22.25    1.11
  -5   4   0   20.20    1.06
   4  -4   0   77.63    3.00
   4  -4   0   79.57    2.89
   4  -4   0   80.70    2.96
   4  -4   0   78.09    2.88
  -4   4   0   79.36    2.90
  -4   4   0   79.53    3.02
  -4   4   0   78.83    2.89
   3  -4   0  224.03    7.43
   3  -4   0  224.16    7.56
   3  -4   0  211.62    7.97
  -3   4   0  215.74    7.98
  -3   4   0  230.63    7.44
  -3   4   0  224.34    7.43
   2  -4   0  131.26    4.43
   2  -4   0  124.45    4.74
  -2   4   0  126.46    4.74
  -2   4   0  135.62    4.44
  -2   4   0  132.74    4.43
   1  -4   0   31.56    1.29
   1  -4   0   33.75    1.31
   1  -4   0   30.17    1.23
  -1   4   0   32.60    1.30
  -1   4   0   30.57    1.23
   0  -4   0    6.14    0.42
   0  -4   0    5.26    0.39
   0  -4   0    5.94    0.38
   0   4   0    6.02    0.39
   0   4   0    5.67    0.41
   0   4   0    5.53    0.39
  -1  -4   0  592.22   18.86
  -1  -4   0  550.92   20.29
   1   4   0  586.45   18.55
   1   4   0  557.04   19.34
  -2  -4   0  306.15   10.13
  -2  -4   0  311.17   10.54
   2   4   0  313.78   10.13
  -3  -4   0  123.65    4.38
  -3  -4   0  120.45    4.27
  -3  -4   0  120.47    4.20
  -3  -4   0  124.69    4.21
   3   4   0  123.83    4.28
   3   4   0  133.49    4.21
   3   4   0  128.52    4.21
   3   4   0  125.99    4.38
  -4  -4   0   84.35    3.10
  -4  -4   0   84.89    2.97
  -4  -4   0   89.94    2.98
  -4  -4   0   79.42    3.01
   4   4   0   81.42    3.02
   4   4   0   91.56    2.99
   4   4   0   91.65    2.98
   4   4   0   86.17    3.10
  -5  -4   0  138.04    5.08
  -5  -4   0  143.49    4.90
  -5  -4   0  141.23    4.98
  -5  -4   0  142.31    4.90
   5   4   0  147.30    4.99
   5   4   0  147.77    4.91
   5   4   0  155.51    4.92
   5   4   0  145.56    5.09
  -6  -4   0   76.76    2.92
  -6  -4   0   80.18    2.88
  -6  -4   0   83.56    2.89
  -6  -4   0   79.45    2.99
   6   4   0   79.36    2.98
   6   4   0   79.61    2.93
   6   4   0   84.44    2.89
   6   4   0   83.52    2.90
  -7  -4   0   56.37    2.22
  -7  -4   0   58.15    2.26
  -7  -4   0   60.05    2.20
  -7  -4   0   57.66    2.18
   7   4   0   56.44    2.26
   7   4   0   55.33    2.22
   7   4   0   58.42    2.20
  -8  -4   0   17.38    0.99
  -8  -4   0   16.24    0.96
  -8  -4   0   16.76    0.98
  -8  -4   0   17.22    1.00
   8   4   0   18.22    1.00
   8   4   0   17.91    0.99
   8   4   0   16.97    0.99
   8   4   0   17.48    1.00
  -9  -4   0    4.43    0.58
  -9  -4   0    4.91    0.58
  -9  -4   0    5.30    0.63
   9   4   0    5.30    0.67
   9   4   0    5.89    0.67
   9   4   0    5.65    0.72
   9   4   0    6.44    0.72
 -10  -4   0    3.77    0.58
 -10  -4   0    4.26    0.63
 -10  -4   0    4.29    0.68
  10   4   0    5.09    0.68
  10   4   0    3.97    0.61
  10   4   0    5.32    0.66
  10   4   0    4.30    0.63
 -11  -4   0    5.66    0.73
 -11  -4   0    7.27    0.81
 -11  -4   0    6.24    0.69
 -11  -4   0    6.13    0.77
  11   4   0    6.32    0.77
  11   4   0    6.68    0.82
  11   4   0    6.57    0.78
  11   4   0    6.18    0.77
 -12  -4   0    7.99    0.83
 -12  -4   0    6.56    0.79
 -12  -4   0    7.30    0.91
 -12  -4   0    5.86    0.80
  12   4   0    7.60    0.93
  12   4   0    7.09    0.91
  12   4   0    7.81    0.98
  12   4   0    6.57    0.85
 -13  -4   0   15.76    1.25
 -13  -4   0   17.10    1.30
 -13  -4   0   14.45    1.20
 -13  -4   0   14.68    1.30
  13   4   0   16.32    1.37
  13   4   0   16.91    1.31
  13   4   0   16.48    1.30
  13   4   0   17.81    1.43
 -14  -4   0    8.41    1.09
 -14  -4   0    6.28    0.92
 -14  -4   0    8.08    1.09
 -14  -4   0    9.15    1.10
  14   4   0    9.08    1.11
  14   4   0    7.06    1.04
  14   4   0    6.81    1.10
  14   4   0    7.09    1.01
 -15  -4   0    5.10    1.02
 -15  -4   0    4.67    0.82
 -15  -4   0    4.10    0.92
 -15  -4   0    2.61    0.87
  15   4   0    4.26    0.95
  15   4   0    4.99    1.02
  15   4   0    5.59    1.02
  15   4   0    5.19    1.00
 -16  -4   0    1.05    0.89
 -16  -4   0    1.77    0.86
 -16  -4   0    1.44    0.80
 -16  -4   0    1.15    1.03
  16   4   0    2.11    1.00
  16   4   0    1.61    0.96
  16   4   0   -0.06    0.84
  16   4   0    2.46    1.03
 -17  -4   0    4.74    0.95
 -17  -4   0    2.66    1.22
 -17  -4   0    3.95    1.09
 -17  -4   0    2.43    1.02
  17   4   0    2.99    1.18
  17   4   0    1.13    1.05
  17   4   0    4.64    1.21
  17   4   0    3.63    1.13
 -18  -4   0    3.33    1.10
 -18  -4   0    3.97    1.17
 -18  -4   0    3.61    1.44
 -18  -4   0    1.34    1.02
  18   4   0    2.93    1.46
  18   4   0    3.48    1.26
  18   4   0    2.06    1.34
  18   4   0    0.20    1.33
 -19  -4   0    0.05    1.22
 -19  -4   0   -0.62    1.23
 -19  -4   0    1.00    1.47
 -19  -4   0    1.63    1.16
  19   4   0   -1.05    1.36
  19   4   0    1.18    1.47
  19   4   0    2.46    1.40
 -20  -4   0    0.63    1.31
 -20  -4   0   -0.29    1.30
 -20  -4   0    2.05    1.56
 -20  -4   0   -4.25    1.62
  20   4   0    0.62    1.61
  20   4   0    1.50    1.91
 -21  -4   0    2.23    1.57
 -21  -4   0   -2.53    2.09
 -21  -4   0    3.88    1.64
 -21  -4   0   -3.40    1.65
  21   4   0    1.30    2.14
  21   4   0    1.01    1.96
  17  -5   0    2.45    1.91
  17  -5   0   -1.02    1.40
 -17   5   0    1.05    1.73
 -17   5   0    0.02    1.32
  16  -5   0    0.17    1.20
  16  -5   0   -0.03    1.56
 -16   5   0   -3.17    1.27
 -16   5   0   -0.09    1.39
 -16   5   0   -0.37    1.10
  15  -5   0    0.03    1.37
  15  -5   0    0.24    1.04
  15  -5   0   -2.37    1.31
 -15   5   0   -0.79    1.27
 -15   5   0   -0.91    0.99
  14  -5   0    4.41    1.28
  14  -5   0    0.82    1.12
  14  -5   0    3.04    1.07
 -14   5   0    3.71    1.01
 -14   5   0    0.45    0.98
 -14   5   0    3.03    1.20
  13  -5   0   13.29    1.48
  13  -5   0   12.07    1.53
  13  -5   0   10.01    1.35
 -13   5   0   10.03    1.41
 -13   5   0   14.39    1.51
  12  -5   0   15.66    1.48
  12  -5   0   12.55    1.53
  12  -5   0   16.47    1.57
 -12   5   0   15.06    1.48
 -12   5   0   14.51    1.41
 -12   5   0   14.38    1.61
  11  -5   0    6.40    0.90
  11  -5   0    5.24    0.97
  11  -5   0    7.61    1.13
  11  -5   0    7.04    0.94
 -11   5   0    6.23    1.03
 -11   5   0    7.41    0.89
 -11   5   0    6.03    0.96
  10  -5   0    5.79    0.96
  10  -5   0    6.28    0.86
  10  -5   0    5.20    0.90
  10  -5   0    4.26    0.84
 -10   5   0    5.44    0.85
 -10   5   0    6.54    0.81
 -10   5   0    5.52    0.90
   9  -5   0    7.13    0.86
   9  -5   0    5.87    0.83
   9  -5   0    6.91    0.92
   9  -5   0    7.49    1.02
  -9   5   0    5.83    0.85
  -9   5   0    4.14    0.79
  -9   5   0    6.95    0.89
   8  -5   0   53.31    2.31
   8  -5   0   48.77    2.23
   8  -5   0   51.26    2.38
   8  -5   0   50.44    2.29
  -8   5   0   51.76    2.27
  -8   5   0   52.33    2.34
  -8   5   0   50.80    2.27
   7  -5   0   36.22    1.68
   7  -5   0   36.22    1.72
   7  -5   0   35.97    1.83
   7  -5   0   38.93    1.76
  -7   5   0   38.92    1.77
  -7   5   0   36.49    1.71
  -7   5   0   37.54    1.79
   6  -5   0   36.82    1.72
   6  -5   0   38.03    1.67
   6  -5   0   38.02    1.69
   6  -5   0   35.35    1.61
  -6   5   0   35.68    1.62
  -6   5   0   36.85    1.66
  -6   5   0   33.95    1.63
   5  -5   0   28.14    1.34
   5  -5   0   27.83    1.40
   5  -5   0   27.45    1.31
   5  -5   0   25.37    1.27
  -5   5   0   28.86    1.34
  -5   5   0   27.59    1.31
  -5   5   0   29.94    1.37
   4  -5   0   24.40    1.18
   4  -5   0   23.92    1.14
   4  -5   0   24.37    1.24
  -4   5   0   24.31    1.19
  -4   5   0   24.12    1.15
  -4   5   0   24.43    1.18
   3  -5   0  166.32    6.09
   3  -5   0  174.75    6.53
   3  -5   0  179.92    6.24
  -3   5   0  183.32    6.55
  -3   5   0  187.43    6.13
  -3   5   0  185.93    6.12
   2  -5   0  253.67    8.35
   2  -5   0  249.56    8.64
   2  -5   0  243.16    9.00
  -2   5   0  257.39    8.36
  -2   5   0  246.61    9.01
  -2   5   0  253.20    8.35
   1  -5   0   94.50    3.36
   1  -5   0   90.91    3.23
   1  -5   0   93.89    3.47
  -1   5   0   92.86    3.47
  -1   5   0   91.78    3.23
   0  -5   0   35.75    1.44
   0  -5   0   36.25    1.36
   0  -5   0   34.75    1.46
   0   5   0   37.75    1.38
   0   5   0   34.27    1.43
   0   5   0   34.70    1.45
  -1  -5   0    1.03    0.26
  -1  -5   0    1.25    0.23
  -1  -5   0    0.98    0.24
   1   5   0    0.76    0.26
   1   5   0    0.96    0.23
  -2  -5   0    8.83    0.53
  -2  -5   0    8.69    0.47
   2   5   0    6.85    0.46
   2   5   0    6.82    0.52
  -3  -5   0   83.02    2.91
  -3  -5   0   83.39    2.99
  -3  -5   0   84.89    2.85
  -3  -5   0   83.32    2.85
   3   5   0   79.72    2.98
   3   5   0   81.34    2.84
  -4  -5   0   18.07    0.81
  -4  -5   0   16.88    0.79
  -4  -5   0   17.58    0.86
  -4  -5   0   15.85    0.81
   4   5   0   17.98    0.87
   4   5   0   19.28    0.81
   4   5   0   17.52    0.83
   4   5   0   20.53    0.82
  -5  -5   0  137.29    4.53
  -5  -5   0  136.40    4.54
  -5  -5   0  131.90    4.61
  -5  -5   0  135.00    4.72
   5   5   0  128.48    4.61
   5   5   0  128.28    4.70
   5   5   0  134.40    4.53
   5   5   0  133.44    4.53
  -6  -5   0   89.98    3.21
  -6  -5   0   90.71    3.21
  -6  -5   0   85.08    3.25
  -6  -5   0   90.21    3.34
   6   5   0   89.39    3.27
   6   5   0   93.22    3.22
   6   5   0   93.06    3.35
   6   5   0   94.49    3.22
  -7  -5   0   53.64    2.07
  -7  -5   0   56.77    2.10
  -7  -5   0   51.33    2.11
  -7  -5   0   55.19    2.17
   7   5   0   50.00    2.11
   7   5   0   55.29    2.09
   7   5   0   57.70    2.11
   7   5   0   53.64    2.16
  -8  -5   0   29.22    1.33
  -8  -5   0   28.04    1.35
  -8  -5   0   30.20    1.36
  -8  -5   0   30.50    1.40
   8   5   0   30.86    1.37
   8   5   0   28.68    1.34
   8   5   0   27.99    1.36
   8   5   0   28.97    1.39
  -9  -5   0    8.73    0.79
  -9  -5   0    8.14    0.76
  -9  -5   0    7.83    0.71
  -9  -5   0    7.60    0.75
   9   5   0    8.82    0.76
   9   5   0    7.60    0.75
   9   5   0    8.21    0.75
   9   5   0    7.67    0.79
 -10  -5   0   24.87    1.29
 -10  -5   0   24.58    1.30
 -10  -5   0   22.69    1.30
 -10  -5   0   23.55    1.33
  10   5   0   24.86    1.34
  10   5   0   26.06    1.31
  10   5   0   25.30    1.33
  10   5   0   24.10    1.34
 -11  -5   0    6.05    0.74
 -11  -5   0    6.14    0.74
 -11  -5   0    6.49    0.81
  11   5   0    7.36    0.85
  11   5   0    5.76    0.75
  11   5   0    6.46    0.82
  11   5   0    6.71    0.80
 -12  -5   0    5.70    0.77
 -12  -5   0    8.68    0.96
 -12  -5   0    7.27    0.83
 -12  -5   0    7.31    0.89
  12   5   0    8.54    0.92
  12   5   0    7.50    0.91
  12   5   0    6.62    0.86
  12   5   0    7.62    0.97
 -13  -5   0   15.30    1.29
 -13  -5   0   14.22    1.17
 -13  -5   0   16.77    1.27
 -13  -5   0   13.85    1.28
  13   5   0   16.11    1.29
  13   5   0   16.75    1.35
  13   5   0   18.37    1.39
  13   5   0   18.32    1.35
 -14  -5   0    3.64    0.75
 -14  -5   0    3.26    0.79
 -14  -5   0    3.45    0.87
 -14  -5   0    2.54    0.88
  14   5   0    3.02    0.82
  14   5   0    3.87    0.85
  14   5   0    3.71    0.92
  14   5   0    2.29    0.83
 -15  -5   0    2.30    0.74
 -15  -5   0    3.13    0.95
 -15  -5   0    4.17    0.86
 -15  -5   0    2.90    0.98
  15   5   0    3.83    0.92
  15   5   0    4.53    0.99
  15   5   0    3.29    0.82
  15   5   0    3.69    0.92
 -16  -5   0   -0.56    0.82
 -16  -5   0   -0.38    0.80
 -16  -5   0    0.49    0.89
 -16  -5   0    0.00    0.71
  16   5   0    0.75    0.98
  16   5   0    0.84    0.80
  16   5   0    0.55    0.88
  16   5   0   -1.48    0.82
 -17  -5   0    4.52    1.02
 -17  -5   0    2.51    1.03
 -17  -5   0    4.76    1.10
 -17  -5   0    2.51    1.16
  17   5   0    4.67    1.31
  17   5   0    4.19    1.12
  17   5   0    3.95    1.15
  17   5   0    3.35    1.09
 -18  -5   0   -1.02    0.99
 -18  -5   0   -1.02    1.23
 -18  -5   0   -0.09    0.95
 -18  -5   0   -0.31    1.09
  18   5   0    0.24    1.23
  18   5   0   -0.44    1.31
  18   5   0   -1.01    1.14
  18   5   0    1.21    1.24
 -19  -5   0   -0.25    1.06
 -19  -5   0   -1.56    1.37
 -19  -5   0    2.62    1.26
 -19  -5   0   -2.14    1.20
  19   5   0   -0.85    1.31
  19   5   0    0.73    1.38
  19   5   0    1.96    1.47
 -20  -5   0    0.54    1.25
 -20  -5   0    2.43    1.37
 -20  -5   0   -0.62    1.33
 -20  -5   0   -1.35    1.63
  20   5   0    3.70    1.67
  20   5   0    0.50    1.78
  20   5   0    0.33    1.44
 -21  -5   0   -0.12    1.43
 -21  -5   0    0.68    1.53
 -21  -5   0    0.15    1.62
 -21  -5   0    2.07    2.08
  21   5   0    1.91    2.24
  21   5   0    1.12    1.80
 -17   6   0    3.89    1.99
 -17   6   0    1.06    1.48
  16  -6   0    0.22    1.81
 -16   6   0    1.84    1.70
 -16   6   0   -1.36    1.16
  15  -6   0    1.57    1.36
  15  -6   0    2.13    1.52
 -15   6   0   -0.44    1.08
 -15   6   0   -1.21    1.19
 -15   6   0    0.33    1.48
  14  -6   0    0.61    1.33
  14  -6   0    0.43    1.04
  14  -6   0   -1.48    1.25
 -14   6   0    0.30    0.92
 -14   6   0   -2.73    0.94
 -14   6   0   -0.35    1.27
  13  -6   0    1.29    0.90
  13  -6   0    3.21    1.10
  13  -6   0    1.23    1.20
 -13   6   0    0.07    0.95
 -13   6   0    1.16    0.87
 -13   6   0    1.36    1.09
  12  -6   0    4.35    1.12
  12  -6   0    3.10    0.95
  12  -6   0    4.42    0.79
  12  -6   0    4.61    0.98
 -12   6   0    4.39    1.10
 -12   6   0    3.76    0.95
 -12   6   0    4.15    0.89
  11  -6   0    3.13    0.70
  11  -6   0    3.03    0.94
  11  -6   0    1.71    0.83
  11  -6   0    3.86    0.99
 -11   6   0    2.41    0.88
 -11   6   0    2.50    0.75
 -11   6   0    3.14    0.88
  10  -6   0    7.56    1.11
  10  -6   0    4.96    0.86
  10  -6   0    5.40    0.75
  10  -6   0    6.11    1.04
 -10   6   0    6.38    0.85
 -10   6   0    6.02    0.90
 -10   6   0    5.44    0.96
   9  -6   0    2.86    0.78
   9  -6   0    2.94    0.59
   9  -6   0    2.81    0.79
   9  -6   0    1.20    0.70
  -9   6   0    3.45    0.63
  -9   6   0    3.60    0.87
  -9   6   0    3.53    0.72
   8  -6   0   13.34    1.18
   8  -6   0   13.18    1.31
   8  -6   0   15.68    1.22
   8  -6   0   12.82    1.02
  -8   6   0   15.86    1.28
  -8   6   0   13.49    1.15
  -8   6   0   13.11    1.06
   7  -6   0   47.88    2.11
   7  -6   0   42.67    1.99
   7  -6   0   45.76    2.17
  -7   6   0   44.17    2.05
  -7   6   0   44.95    2.10
  -7   6   0   45.05    2.03
   6  -6   0   14.88    1.16
   6  -6   0   15.73    0.97
   6  -6   0   14.76    1.05
  -6   6   0   15.64    1.05
  -6   6   0   15.33    1.13
  -6   6   0   16.33    0.99
   5  -6   0   58.17    2.50
   5  -6   0   63.09    2.56
   5  -6   0   62.28    2.47
  -5   6   0   63.97    2.50
  -5   6   0   63.54    2.48
  -5   6   0   62.34    2.53
   4  -6   0   18.05    1.11
   4  -6   0   18.48    0.98
   4  -6   0   19.48    1.04
  -4   6   0   19.16    1.08
  -4   6   0   19.35    1.05
  -4   6   0   18.67    1.01
   3  -6   0   37.01    1.68
   3  -6   0   38.89    1.64
   3  -6   0   38.43    1.61
  -3   6   0   38.18    1.64
  -3   6   0   38.06    1.62
  -3   6   0   37.94    1.61
   2  -6   0   44.05    1.91
   2  -6   0   46.59    1.90
   2  -6   0   46.61    1.84
  -2   6   0   47.19    1.92
  -2   6   0   47.12    1.85
  -2   6   0   49.34    1.86
   1  -6   0   25.96    1.16
   1  -6   0   24.52    1.16
   1  -6   0   25.69    1.11
  -1   6   0   24.07    1.14
  -1   6   0   25.81    1.12
   0  -6   0   11.84    0.65
   0  -6   0   11.24    0.68
   0  -6   0   10.81    0.67
   0   6   0   11.11    0.67
   0   6   0   11.24    0.68
   0   6   0   11.45    0.66
  -1  -6   0   83.11    3.04
  -1  -6   0   88.27    3.21
  -1  -6   0   87.50    3.33
   1   6   0   87.62    3.20
   1   6   0   92.70    3.07
  -2  -6   0   55.28    2.16
  -2  -6   0   56.91    2.04
   2   6   0   56.10    2.16
   2   6   0   58.63    2.06
  -3  -6   0    3.66    0.39
  -3  -6   0    3.61    0.36
  -3  -6   0    3.81    0.43
   3   6   0    4.20    0.46
   3   6   0    4.23    0.40
  -4  -6   0   76.83    2.66
  -4  -6   0   75.35    2.65
  -4  -6   0   70.97    2.70
  -4  -6   0   75.42    2.79
   4   6   0   77.62    2.66
   4   6   0   73.92    2.78
  -5  -6   0  147.08    5.25
  -5  -6   0  155.51    5.16
  -5  -6   0  154.00    5.38
  -5  -6   0  154.61    5.16
   5   6   0  157.12    5.16
   5   6   0  148.09    5.25
   5   6   0  146.66    5.36
   5   6   0  153.68    5.16
  -6  -6   0   81.57    3.08
  -6  -6   0   82.78    2.95
  -6  -6   0   78.36    3.00
  -6  -6   0   80.65    2.94
   6   6   0   82.94    2.96
   6   6   0   85.97    2.96
   6   6   0   82.43    3.02
   6   6   0   83.40    3.09
  -7  -6   0   49.60    1.93
  -7  -6   0   43.76    1.95
  -7  -6   0   49.01    2.02
  -7  -6   0   51.34    1.94
   7   6   0   52.09    1.97
   7   6   0   50.27    1.93
   7   6   0   48.74    2.02
   7   6   0   48.51    1.98
  -8  -6   0   26.09    1.22
  -8  -6   0   24.47    1.23
  -8  -6   0   25.03    1.26
  -8  -6   0   25.93    1.22
   8   6   0   24.92    1.29
   8   6   0   25.77    1.25
   8   6   0   23.45    1.22
   8   6   0   25.15    1.22
  -9  -6   0   33.74    1.52
  -9  -6   0   34.24    1.54
  -9  -6   0   32.66    1.56
  -9  -6   0   31.74    1.50
   9   6   0   32.20    1.49
   9   6   0   32.20    1.56
   9   6   0   31.84    1.51
   9   6   0   32.00    1.52
 -10  -6   0   16.99    1.07
 -10  -6   0   18.07    1.11
 -10  -6   0   20.46    1.16
 -10  -6   0   17.78    1.11
  10   6   0   16.13    1.10
  10   6   0   18.64    1.16
  10   6   0   18.25    1.12
  10   6   0   16.51    1.07
 -11  -6   0   41.35    1.89
 -11  -6   0   40.81    1.86
 -11  -6   0   41.08    1.95
 -11  -6   0   41.93    1.92
  11   6   0   40.19    1.94
  11   6   0   39.73    1.88
  11   6   0   41.27    1.93
  11   6   0   41.64    1.88
 -12  -6   0   14.61    1.15
 -12  -6   0   14.49    1.11
 -12  -6   0   14.34    1.12
  12   6   0   13.15    1.16
  12   6   0   15.31    1.14
  12   6   0   13.86    1.17
  12   6   0   14.12    1.13
 -13  -6   0   12.56    1.20
 -13  -6   0   12.08    1.15
 -13  -6   0   10.96    1.14
  13   6   0   12.40    1.22
  13   6   0   12.48    1.17
  13   6   0    9.60    1.15
  13   6   0   13.28    1.25
 -14  -6   0    3.15    0.77
 -14  -6   0    1.36    0.65
 -14  -6   0    2.35    0.85
 -14  -6   0    2.32    0.79
  14   6   0    3.69    0.88
  14   6   0    2.76    0.87
  14   6   0    3.02    0.82
  14   6   0    1.72    0.82
 -15  -6   0   -0.52    0.61
 -15  -6   0   -1.73    0.73
 -15  -6   0   -0.10    0.70
 -15  -6   0    0.10    0.63
  15   6   0   -0.26    0.72
  15   6   0    1.46    0.82
  15   6   0    0.11    0.78
  15   6   0    0.81    0.75
 -16  -6   0    7.21    1.08
 -16  -6   0    6.74    1.05
 -16  -6   0    6.77    0.98
 -16  -6   0    6.56    1.12
  16   6   0    8.83    1.26
  16   6   0    6.66    1.22
  16   6   0    7.43    1.09
  16   6   0    6.95    1.20
 -17  -6   0    5.10    1.12
 -17  -6   0    5.77    1.25
 -17  -6   0    8.03    1.18
 -17  -6   0    6.92    1.09
  17   6   0    6.87    1.15
  17   6   0    5.20    1.30
  17   6   0    7.81    1.25
  17   6   0    4.85    1.22
 -18  -6   0   -0.92    1.01
 -18  -6   0   -1.35    0.91
 -18  -6   0   -1.83    0.99
 -18  -6   0    0.16    1.10
  18   6   0   -0.49    1.22
  18   6   0    1.19    1.14
  18   6   0    0.40    1.06
  18   6   0   -0.15    1.17
 -19  -6   0    0.65    1.21
 -19  -6   0   -1.75    1.01
 -19  -6   0   -1.49    1.23
 -19  -6   0    1.43    1.35
  19   6   0    0.42    1.34
  19   6   0    0.10    1.20
  19   6   0    1.32    1.42
 -20  -6   0    1.44    1.58
 -20  -6   0   -0.85    1.48
 -20  -6   0    2.59    1.29
  20   6   0    3.71    1.50
  20   6   0    6.72    1.74
  20   6   0    4.52    1.74
  20   6   0    1.65    1.79
 -21  -6   0   -2.49    1.55
 -21  -6   0   -0.29    1.39
 -21  -6   0    0.95    1.57
 -21  -6   0   -0.87    1.80
  21   6   0    1.22    1.71
  21   6   0   -0.18    2.07
  16  -7   0    1.45    1.98
 -16   7   0    1.29    1.35
 -16   7   0    1.87    1.84
  15  -7   0   -1.77    1.59
 -15   7   0    0.90    1.65
 -15   7   0    1.52    1.23
  14  -7   0    1.86    1.34
  14  -7   0   -0.23    1.51
 -14   7   0    2.74    1.10
 -14   7   0    1.88    1.50
 -14   7   0   -1.05    1.14
  13  -7   0    0.58    0.99
  13  -7   0   -0.63    1.25
 -13   7   0    0.46    0.90
 -13   7   0    0.01    0.99
 -13   7   0    1.21    1.21
  12  -7   0    1.37    0.69
  12  -7   0    0.90    1.09
  12  -7   0    0.87    1.02
 -12   7   0    1.10    0.81
 -12   7   0    2.22    1.13
 -12   7   0   -0.89    0.83
  11  -7   0    1.03    0.83
  11  -7   0   -1.04    0.57
  11  -7   0   -2.30    0.80
 -11   7   0    0.08    0.63
 -11   7   0   -0.86    0.71
 -11   7   0   -0.03    0.85
  10  -7   0    3.07    0.88
  10  -7   0    2.87    0.68
  10  -7   0    2.90    0.94
 -10   7   0    4.12    0.91
 -10   7   0    3.23    0.70
 -10   7   0    3.71    0.81
   9  -7   0    9.24    1.16
   9  -7   0    8.02    1.10
   9  -7   0   10.67    1.02
  -9   7   0    8.05    1.01
  -9   7   0    9.04    1.06
  -9   7   0   11.25    1.29
   8  -7   0    3.33    0.82
   8  -7   0    3.65    0.79
   8  -7   0    2.61    0.59
  -8   7   0    3.48    0.65
  -8   7   0    2.47    0.60
  -8   7   0    3.17    0.80
   7  -7   0   13.31    1.21
   7  -7   0   12.87    1.23
   7  -7   0   11.85    0.97
  -7   7   0   13.42    1.23
  -7   7   0   12.11    1.09
  -7   7   0   11.77    1.02
   6  -7   0    1.01    0.44
   6  -7   0    0.55    0.59
   6  -7   0    1.20    0.59
  -6   7   0    1.04    0.62
  -6   7   0    0.78    0.47
  -6   7   0    0.64    0.51
   5  -7   0   19.15    1.15
   5  -7   0   18.51    1.21
   5  -7   0   16.51    1.03
  -5   7   0   18.30    1.12
  -5   7   0   19.53    1.17
  -5   7   0   16.29    1.04
   4  -7   0   20.78    1.16
   4  -7   0   17.63    1.06
   4  -7   0   18.92    1.20
  -4   7   0   20.22    1.10
  -4   7   0   21.16    1.15
  -4   7   0   22.15    1.18
   3  -7   0   41.44    1.82
   3  -7   0   42.40    1.87
   3  -7   0   43.88    1.89
  -3   7   0   46.54    1.90
  -3   7   0   44.78    1.85
  -3   7   0   45.40    1.86
   2  -7   0   29.59    1.38
   2  -7   0   30.80    1.43
   2  -7   0   32.23    1.43
  -2   7   0   31.20    1.41
  -2   7   0   31.50    1.40
  -2   7   0   31.36    1.38
   1  -7   0   25.88    1.26
   1  -7   0   27.01    1.22
   1  -7   0   26.67    1.27
  -1   7   0   30.11    1.26
  -1   7   0   27.13    1.27
   0  -7   0    3.44    0.43
   0  -7   0    3.70    0.44
   0  -7   0    4.19    0.50
   0   7   0    3.56    0.47
   0   7   0    4.20    0.50
   0   7   0    3.44    0.43
  -1  -7   0   35.78    1.48
  -1  -7   0   37.54    1.59
  -1  -7   0   36.91    1.61
   1   7   0   39.44    1.60
   1   7   0   39.38    1.51
  -2  -7   0   28.02    1.25
  -2  -7   0   27.71    1.22
  -2  -7   0   25.00    1.11
   2   7   0   24.99    1.12
   2   7   0   25.78    1.21
  -3  -7   0   90.82    3.31
  -3  -7   0   86.56    3.13
   3   7   0   90.82    3.14
   3   7   0   90.35    3.31
  -4  -7   0   15.22    0.76
  -4  -7   0   14.45    0.76
  -4  -7   0   13.97    0.80
  -4  -7   0   15.25    0.85
   4   7   0   14.88    0.77
   4   7   0   13.70    0.84
  -5  -7   0  244.48    8.41
  -5  -7   0  250.18    8.26
  -5  -7   0  247.51    8.62
  -5  -7   0  253.80    8.28
   5   7   0  238.75    8.60
   5   7   0  250.36    8.27
   5   7   0  251.27    8.27
  -6  -7   0  252.59    8.77
  -6  -7   0  264.23    8.62
  -6  -7   0  261.10    8.62
  -6  -7   0  259.62    8.98
   6   7   0  251.88    8.77
   6   7   0  262.67    8.62
   6   7   0  255.27    8.96
   6   7   0  258.12    8.62
  -7  -7   0   28.16    1.38
  -7  -7   0   28.69    1.30
  -7  -7   0   29.49    1.30
  -7  -7   0   28.64    1.33
   7   7   0   29.63    1.30
   7   7   0   28.95    1.34
   7   7   0   28.24    1.39
   7   7   0   28.95    1.31
  -8  -7   0   40.19    1.69
  -8  -7   0   40.59    1.68
  -8  -7   0   39.71    1.77
  -8  -7   0   37.81    1.71
   8   7   0   39.40    1.73
   8   7   0   39.78    1.68
   8   7   0   40.85    1.79
   8   7   0   39.65    1.70
  -9  -7   0   31.78    1.55
  -9  -7   0   31.53    1.55
  -9  -7   0   30.93    1.46
  -9  -7   0   31.54    1.48
   9   7   0   31.92    1.50
   9   7   0   32.02    1.57
   9   7   0   32.07    1.51
   9   7   0   32.73    1.56
 -10  -7   0   29.65    1.46
 -10  -7   0   28.71    1.42
 -10  -7   0   30.89    1.50
 -10  -7   0   28.56    1.44
  10   7   0   28.53    1.50
  10   7   0   26.13    1.44
  10   7   0   28.50    1.46
  10   7   0   27.31    1.41
 -11  -7   0   20.36    1.22
 -11  -7   0   22.12    1.31
 -11  -7   0   22.83    1.31
 -11  -7   0   21.78    1.27
  11   7   0   21.46    1.26
  11   7   0   18.50    1.31
  11   7   0   20.63    1.24
  11   7   0   18.97    1.25
 -12  -7   0   18.70    1.31
 -12  -7   0   19.14    1.25
 -12  -7   0   17.77    1.29
 -12  -7   0   17.88    1.25
  12   7   0   20.61    1.31
  12   7   0   17.64    1.26
  12   7   0   18.71    1.25
  12   7   0   17.96    1.32
 -13  -7   0    4.88    0.85
 -13  -7   0    2.87    0.77
 -13  -7   0    5.63    0.84
  13   7   0    5.30    0.86
  13   7   0    4.24    0.74
  13   7   0    5.12    0.87
  13   7   0    3.33    0.78
 -14  -7   0   -1.09    0.69
 -14  -7   0    1.34    0.72
 -14  -7   0   -0.06    0.70
  14   7   0    0.73    0.68
  14   7   0    1.45    0.79
  14   7   0    0.44    0.81
  14   7   0   -0.12    0.71
 -15  -7   0    3.13    0.75
 -15  -7   0    2.38    0.82
 -15  -7   0    1.08    0.79
 -15  -7   0    2.85    0.85
  15   7   0    3.62    0.89
  15   7   0    2.23    0.79
  15   7   0    3.25    0.91
  15   7   0    3.35    0.93
 -16  -7   0    6.97    0.97
 -16  -7   0    7.12    1.05
 -16  -7   0    5.67    1.00
 -16  -7   0    7.31    1.17
  16   7   0    5.04    1.03
  16   7   0    6.48    1.15
  16   7   0    8.00    1.17
  16   7   0    8.42    1.23
 -17  -7   0   14.15    1.48
 -17  -7   0   13.72    1.67
 -17  -7   0   15.32    1.62
 -17  -7   0   12.82    1.45
  17   7   0   10.36    1.37
  17   7   0   10.39    1.59
  17   7   0    9.50    1.28
  17   7   0   12.68    1.54
 -18  -7   0    0.49    0.91
 -18  -7   0    1.42    1.15
 -18  -7   0   -0.50    1.08
 -18  -7   0    0.03    0.91
  18   7   0    0.39    1.11
  18   7   0   -0.56    1.17
  18   7   0    0.40    1.03
  18   7   0   -0.51    1.10
 -19  -7   0    3.68    1.17
 -19  -7   0    3.81    1.48
 -19  -7   0    3.34    1.42
 -19  -7   0    1.98    1.18
  19   7   0    4.63    1.50
  19   7   0    2.91    1.45
  19   7   0    2.10    1.32
 -20  -7   0    3.63    1.41
 -20  -7   0    4.22    1.69
 -20  -7   0    4.34    1.45
 -20  -7   0    4.94    1.56
  20   7   0    2.31    1.70
  20   7   0    6.01    1.71
  20   7   0    6.18    1.70
  20   7   0    4.39    1.58
 -21  -7   0   -0.28    1.59
 -21  -7   0    0.88    1.44
 -21  -7   0    4.91    1.61
 -21  -7   0    1.91    1.91
  21   7   0    0.64    1.68
  21   7   0    3.51    2.16
 -22  -7   0    0.84    2.22
 -22  -7   0    0.23    1.65
 -22  -7   0    1.94    1.74
  22   7   0    1.16    2.67
  22   7   0   -0.99    2.06
 -16   8   0   -3.91    1.81
  15  -8   0   -4.44    1.80
 -15   8   0   -2.95    1.74
 -15   8   0    0.97    1.31
  14  -8   0   -2.51    1.56
  14  -8   0    2.45    1.50
 -14   8   0    2.03    1.57
 -14   8   0    1.29    1.14
 -14   8   0   -1.47    1.24
  13  -8   0    0.22    1.21
  13  -8   0    0.96    1.33
 -13   8   0    1.40    1.37
 -13   8   0    1.37    1.03
 -13   8   0    1.05    0.97
  12  -8   0    3.51    1.33
  12  -8   0    5.55    0.94
  12  -8   0    3.71    1.33
 -12   8   0    3.70    1.05
 -12   8   0    3.33    1.25
 -12   8   0    4.17    0.98
  11  -8   0    1.58    1.01
  11  -8   0    1.40    0.69
  11  -8   0    2.13    0.97
 -11   8   0    2.49    0.85
 -11   8   0    1.53    1.04
 -11   8   0    0.51    0.82
  10  -8   0    0.36    0.59
  10  -8   0    0.00    0.80
  10  -8   0    0.90    0.92
 -10   8   0    1.17    0.91
 -10   8   0    0.35    0.65
 -10   8   0    2.45    0.79
   9  -8   0    4.24    1.02
   9  -8   0    2.59    0.84
   9  -8   0    2.90    0.65
  -9   8   0    2.35    0.92
  -9   8   0    4.28    0.75
  -9   8   0    3.17    0.74
   8  -8   0    0.60    0.53
   8  -8   0    0.95    0.73
   8  -8   0    1.03    0.73
  -8   8   0    1.40    0.57
  -8   8   0    0.39    0.63
  -8   8   0    0.94    0.59
   7  -8   0    9.43    1.18
   7  -8   0    9.90    1.12
   7  -8   0    8.54    0.93
  -7   8   0    8.27    1.02
  -7   8   0    8.08    1.00
  -7   8   0    9.47    0.97
   6  -8   0   33.26    1.80
   6  -8   0   33.94    1.67
   6  -8   0   33.50    1.83
  -6   8   0   35.37    1.82
  -6   8   0   32.89    1.71
  -6   8   0   32.55    1.75
   5  -8   0   34.96    1.71
   5  -8   0   35.69    1.83
   5  -8   0   37.33    1.77
   5  -8   0   38.33    1.81
  -5   8   0   34.90    1.72
  -5   8   0   38.54    1.81
  -5   8   0   34.23    1.73
   4  -8   0   11.40    0.92
   4  -8   0    9.87    0.83
   4  -8   0   12.19    0.92
   4  -8   0    9.94    0.97
  -4   8   0    9.96    0.86
  -4   8   0   14.45    0.99
  -4   8   0   11.80    0.90
   3  -8   0   52.86    2.24
   3  -8   0   57.90    2.35
   3  -8   0   55.73    2.33
  -3   8   0   56.42    2.27
  -3   8   0   56.69    2.34
  -3   8   0   54.79    2.27
   2  -8   0   84.88    3.23
   2  -8   0   81.49    3.09
   2  -8   0   88.14    3.29
  -2   8   0   80.81    3.09
  -2   8   0   80.25    3.09
  -2   8   0   83.16    3.26
   1  -8   0   43.16    1.87
   1  -8   0   44.78    1.90
   1  -8   0   42.13    1.79
  -1   8   0   45.19    1.90
  -1   8   0   44.42    1.82
   0  -8   0   17.92    0.99
   0  -8   0   16.53    0.92
   0  -8   0   18.27    1.00
   0   8   0   18.39    1.00
   0   8   0   17.62    1.01
   0   8   0   17.87    0.98
  -1  -8   0   30.71    1.43
  -1  -8   0   32.58    1.42
  -1  -8   0   30.20    1.31
   1   8   0   30.37    1.33
   1   8   0   30.06    1.41
  -2  -8   0    9.22    0.70
  -2  -8   0    7.50    0.58
  -2  -8   0    8.83    0.67
   2   8   0    8.34    0.61
   2   8   0    8.26    0.68
  -3  -8   0  123.43    4.26
  -3  -8   0  124.42    4.48
   3   8   0  123.55    4.26
   3   8   0  121.49    4.46
  -4  -8   0   23.87    1.19
  -4  -8   0   24.58    1.11
  -4  -8   0   23.34    1.08
   4   8   0   23.49    1.19
   4   8   0   24.18    1.11
  -5  -8   0  159.93    5.75
  -5  -8   0  161.09    5.49
  -5  -8   0  163.93    5.62
  -5  -8   0  160.89    5.50
   5   8   0  162.62    5.50
   5   8   0  157.83    5.74
  -6  -8   0  314.59   10.42
  -6  -8   0  314.90   10.87
  -6  -8   0  322.60   10.44
  -6  -8   0  307.32   10.61
   6   8   0  317.09   10.43
   6   8   0  311.08   10.85
   6   8   0  307.82   10.42
  -7  -8   0   24.36    1.29
  -7  -8   0   22.91    1.14
  -7  -8   0   23.62    1.20
  -7  -8   0   23.17    1.15
   7   8   0   26.57    1.23
   7   8   0   21.91    1.16
   7   8   0   22.82    1.25
   7   8   0   24.50    1.16
  -8  -8   0  117.50    4.39
  -8  -8   0  117.20    4.19
  -8  -8   0  119.58    4.28
  -8  -8   0  116.75    4.19
   8   8   0  117.99    4.21
   8   8   0  115.74    4.18
   8   8   0  118.70    4.39
   8   8   0  117.75    4.27
  -9  -8   0  144.00    5.07
  -9  -8   0  134.95    4.82
  -9  -8   0  135.82    4.93
  -9  -8   0  136.14    4.84
   9   8   0  132.97    4.82
   9   8   0  136.55    4.85
   9   8   0  134.07    4.93
   9   8   0  135.31    5.03
 -10  -8   0   34.05    1.63
 -10  -8   0   34.66    1.63
 -10  -8   0   33.12    1.69
 -10  -8   0   35.05    1.68
  10   8   0   33.28    1.62
  10   8   0   33.42    1.70
  10   8   0   35.50    1.70
  10   8   0   33.54    1.63
 -11  -8   0    6.78    0.89
 -11  -8   0    5.54    0.73
 -11  -8   0    6.00    0.72
 -11  -8   0    5.43    0.69
  11   8   0    6.84    0.78
  11   8   0    5.10    0.73
  11   8   0    6.45    0.81
  11   8   0    6.42    0.87
 -12  -8   0    3.75    0.69
 -12  -8   0    3.05    0.67
 -12  -8   0    3.92    0.69
 -12  -8   0    3.94    0.78
  12   8   0    3.69    0.69
  12   8   0    4.54    0.75
  12   8   0    4.16    0.81
  12   8   0    2.31    0.65
 -13  -8   0    0.92    0.62
 -13  -8   0    0.89    0.65
 -13  -8   0    0.80    0.57
 -13  -8   0    0.45    0.63
  13   8   0    0.22    0.68
  13   8   0    0.53    0.63
  13   8   0    0.56    0.55
  13   8   0    0.03    0.62
 -14  -8   0    6.82    1.09
 -14  -8   0   10.46    1.19
 -14  -8   0    5.97    1.04
  14   8   0    6.06    1.02
  14   8   0    6.89    1.13
  14   8   0    8.79    1.14
  14   8   0   10.78    1.24
 -15  -8   0   28.07    1.89
 -15  -8   0   26.40    1.84
 -15  -8   0   24.36    1.76
  15   8   0   28.78    1.88
  15   8   0   28.76    2.00
  15   8   0   26.28    1.90
  15   8   0   28.48    1.86
 -16  -8   0    3.04    0.99
 -16  -8   0    2.03    0.83
 -16  -8   0   -0.27    0.75
 -16  -8   0    0.89    0.64
  16   8   0    1.71    0.90
  16   8   0    0.48    0.79
  16   8   0    0.30    0.86
  16   8   0    2.62    0.91
 -17  -8   0    3.67    1.03
 -17  -8   0    4.10    0.91
 -17  -8   0    4.38    1.02
 -17  -8   0    4.80    1.16
  17   8   0    4.38    1.06
  17   8   0    3.40    1.20
  17   8   0    5.09    1.12
  17   8   0    6.34    1.21
 -18  -8   0    0.95    0.80
 -18  -8   0    0.37    0.88
 -18  -8   0    1.22    1.00
 -18  -8   0    0.13    1.13
  18   8   0    1.39    1.01
  18   8   0   -0.49    1.12
  18   8   0   -1.21    1.18
  18   8   0    0.55    1.12
 -19  -8   0    4.54    1.31
 -19  -8   0    2.63    1.14
 -19  -8   0    2.54    1.40
 -19  -8   0    2.29    1.12
  19   8   0    0.17    1.10
  19   8   0    3.90    1.50
  19   8   0    0.80    1.30
 -20  -8   0    4.43    1.48
 -20  -8   0    6.39    1.79
 -20  -8   0    6.91    1.47
 -20  -8   0    9.69    1.64
  20   8   0    5.81    1.55
  20   8   0    7.89    1.76
  20   8   0    9.36    1.83
  20   8   0    5.61    1.77
 -21  -8   0   -0.17    1.49
 -21  -8   0    1.39    1.53
 -21  -8   0    1.72    1.42
 -21  -8   0    2.03    1.85
  21   8   0   -0.99    1.91
  21   8   0    2.75    1.85
 -22  -8   0   -2.17    1.56
 -22  -8   0    0.46    2.10
 -22  -8   0    2.61    1.60
 -22  -8   0   -0.30    1.75
  22   8   0    0.45    1.90
  22   8   0   -3.06    2.26
  15  -9   0   -2.23    2.09
 -15   9   0    0.75    1.38
 -15   9   0   -0.22    1.79
  14  -9   0    0.42    1.83
 -14   9   0    0.33    1.55
 -14   9   0   -0.09    1.18
  13  -9   0    3.67    1.00
  13  -9   0    3.47    1.46
  13  -9   0    2.71    1.61
 -13   9   0    2.18    1.16
 -13   9   0    3.43    1.20
 -13   9   0    4.01    1.57
  12  -9   0    1.06    0.87
  12  -9   0    3.32    1.27
  12  -9   0    0.88    1.28
 -12   9   0    0.85    1.06
 -12   9   0    1.04    0.95
 -12   9   0    0.19    1.24
  11  -9   0    2.21    1.18
  11  -9   0    2.84    1.15
  11  -9   0    1.39    0.75
 -11   9   0    0.69    1.05
 -11   9   0    0.74    0.88
 -11   9   0   -0.21    0.83
  10  -9   0    2.21    1.06
  10  -9   0    1.23    0.67
  10  -9   0    0.21    0.90
 -10   9   0    1.48    0.78
 -10   9   0    1.11    0.99
 -10   9   0    1.81    0.78
   9  -9   0    5.38    1.20
   9  -9   0    5.10    0.81
   9  -9   0    4.96    0.99
  -9   9   0    3.62    1.00
  -9   9   0    5.33    0.91
  -9   9   0    6.39    0.95
   8  -9   0    2.32    0.82
   8  -9   0    1.01    0.61
   8  -9   0    2.01    0.77
  -8   9   0    1.39    0.76
  -8   9   0    2.13    0.72
  -8   9   0    0.92    0.65
   7  -9   0   22.94    1.45
   7  -9   0   22.70    1.55
   7  -9   0   24.87    1.71
   7  -9   0   22.47    1.67
  -7   9   0   22.95    1.52
  -7   9   0   24.40    1.47
  -7   9   0   25.73    1.74
   6  -9   0   60.48    2.57
   6  -9   0   60.34    2.68
   6  -9   0   54.71    2.59
   6  -9   0   57.54    2.61
  -6   9   0   60.98    2.59
  -6   9   0   58.91    2.64
  -6   9   0   55.60    2.56
   5  -9   0  105.09    4.06
   5  -9   0  108.99    4.19
   5  -9   0  104.16    4.14
   5  -9   0  103.21    4.18
  -5   9   0  111.88    4.10
  -5   9   0  105.45    4.05
  -5   9   0  106.27    4.21
   4  -9   0   17.56    1.22
   4  -9   0   18.53    1.31
   4  -9   0   19.27    1.23
   4  -9   0   19.43    1.17
  -4   9   0   19.65    1.19
  -4   9   0   18.68    1.19
  -4   9   0   20.19    1.26
   3  -9   0   15.48    1.03
   3  -9   0   14.32    1.01
   3  -9   0   14.03    0.98
  -3   9   0   15.07    1.03
  -3   9   0   14.54    1.05
  -3   9   0   15.01    0.98
   2  -9   0   77.61    3.03
   2  -9   0   81.14    3.21
   2  -9   0   80.51    3.15
  -2   9   0   79.58    3.04
  -2   9   0   77.70    3.04
  -2   9   0   81.62    3.20
   1  -9   0   38.40    1.71
   1  -9   0   36.10    1.62
   1  -9   0   36.43    1.70
  -1   9   0   36.47    1.70
  -1   9   0   36.27    1.64
   0  -9   0   10.70    0.80
   0  -9   0    9.93    0.80
   0  -9   0   11.80    0.82
   0   9   0   10.90    0.82
   0   9   0   10.39    0.81
  -1  -9   0   23.80    1.26
  -1  -9   0   25.11    1.27
  -1  -9   0   23.65    1.15
   1   9   0   24.19    1.20
   1   9   0   24.50    1.28
  -2  -9   0    2.34    0.42
  -2  -9   0    2.31    0.44
  -2  -9   0    3.48    0.50
   2   9   0    2.21    0.44
   2   9   0    2.42    0.45
  -3  -9   0   67.55    2.77
  -3  -9   0   67.96    2.68
  -3  -9   0   68.81    2.53
   3   9   0   66.42    2.66
   3   9   0   67.62    2.53
  -4  -9   0  122.06    4.28
  -4  -9   0  124.30    4.52
   4   9   0  119.43    4.49
   4   9   0  125.08    4.29
  -5  -9   0  141.08    5.07
  -5  -9   0  144.76    5.21
  -5  -9   0  146.03    4.95
  -5  -9   0  148.64    4.97
   5   9   0  140.51    4.95
   5   9   0  137.56    5.18
  -6  -9   0  106.96    3.70
  -6  -9   0  104.37    3.71
  -6  -9   0  103.40    3.91
  -6  -9   0  103.89    3.79
   6   9   0  105.30    3.71
   6   9   0   97.29    3.87
  -7  -9   0   67.29    2.70
  -7  -9   0   64.23    2.52
  -7  -9   0   64.07    2.53
  -7  -9   0   66.81    2.60
   7   9   0   66.29    2.69
   7   9   0   70.10    2.55
   7   9   0   67.56    2.56
  -8  -9   0  150.22    5.38
  -8  -9   0  144.53    5.22
  -8  -9   0  148.59    5.14
  -8  -9   0  146.67    5.12
   8   9   0  146.96    5.13
   8   9   0  143.74    5.34
   8   9   0  143.30    5.23
   8   9   0  145.14    5.13
  -9  -9   0  113.66    4.13
  -9  -9   0  113.90    4.30
  -9  -9   0  111.67    4.11
  -9  -9   0  109.25    4.18
   9   9   0  113.81    4.30
   9   9   0  117.28    4.13
   9   9   0  115.47    4.21
   9   9   0  111.60    4.11
 -10  -9   0   31.36    1.56
 -10  -9   0   31.67    1.61
 -10  -9   0   30.93    1.52
 -10  -9   0   29.24    1.51
  10   9   0   30.29    1.57
  10   9   0   29.77    1.63
  10   9   0   32.80    1.54
  10   9   0   31.26    1.55
 -11  -9   0    2.37    0.57
 -11  -9   0    2.09    0.56
 -11  -9   0    1.07    0.47
 -11  -9   0    1.94    0.54
  11   9   0    2.19    0.60
  11   9   0    2.05    0.67
  11   9   0    2.82    0.63
  11   9   0    2.17    0.63
 -12  -9   0    0.51    0.51
 -12  -9   0    0.31    0.57
 -12  -9   0    0.07    0.49
 -12  -9   0   -0.33    0.54
  12   9   0    0.34    0.51
  12   9   0    0.36    0.61
  12   9   0    0.51    0.61
  12   9   0    0.09    0.53
 -13  -9   0    1.67    0.62
 -13  -9   0    0.80    0.60
 -13  -9   0   -0.13    0.61
 -13  -9   0    2.39    0.65
  13   9   0   -0.03    0.61
  13   9   0    2.15    0.68
  13   9   0    0.46    0.56
  13   9   0    0.67    0.68
 -14  -9   0   23.28    1.56
 -14  -9   0   16.13    1.57
 -14  -9   0   22.74    1.54
 -14  -9   0   15.96    1.59
  14   9   0   22.14    1.53
  14   9   0   22.14    1.63
  14   9   0   19.50    1.56
  14   9   0   17.36    1.59
 -15  -9   0   31.04    2.00
 -15  -9   0   32.52    2.01
 -15  -9   0   38.86    2.11
  15   9   0   38.56    2.10
  15   9   0   33.43    2.07
  15   9   0   38.97    2.25
  15   9   0   30.91    2.04
 -16  -9   0    4.12    0.90
 -16  -9   0    3.74    1.03
 -16  -9   0    3.30    0.91
  16   9   0    2.33    1.00
  16   9   0    2.56    0.83
  16   9   0    3.16    0.98
 -17  -9   0    1.16    0.81
 -17  -9   0    0.70    0.89
 -17  -9   0    1.02    0.90
 -17  -9   0    2.28    0.90
  17   9   0   -0.57    1.00
  17   9   0   -0.37    1.06
  17   9   0    0.53    0.91
 -18  -9   0    1.45    1.15
 -18  -9   0   -0.41    0.88
 -18  -9   0   -0.03    1.10
 -18  -9   0    0.02    0.89
  18   9   0   -0.63    1.08
  18   9   0    1.09    1.13
  18   9   0   -0.62    1.28
  18   9   0    0.34    1.12
 -19  -9   0    0.45    0.99
 -19  -9   0    1.46    1.30
 -19  -9   0    0.77    1.08
 -19  -9   0   -0.27    1.01
  19   9   0   -1.23    1.26
  19   9   0    0.16    1.08
  19   9   0   -1.36    1.27
 -20  -9   0    1.90    1.22
 -20  -9   0    4.04    1.44
 -20  -9   0    3.18    1.29
 -20  -9   0    2.58    1.55
  20   9   0    0.72    1.62
  20   9   0    1.10    1.47
  20   9   0    2.09    1.41
  20   9   0    7.25    1.70
 -21  -9   0    4.48    1.63
 -21  -9   0    5.41    1.54
 -21  -9   0    2.15    1.76
 -21  -9   0    3.24    1.49
  21   9   0    0.31    1.87
  21   9   0    7.77    1.87
 -22  -9   0   -3.24    1.71
 -22  -9   0   -1.30    1.61
 -22  -9   0    2.81    2.05
 -22  -9   0   -2.08    1.54
  22   9   0   -1.80    1.95
  22   9   0   -0.16    2.21
  14 -10   0   -1.36    1.48
  14 -10   0    0.87    2.06
 -14  10   0    0.85    1.33
 -14  10   0   -0.96    1.81
  13 -10   0    3.29    1.11
  13 -10   0    0.08    1.34
  13 -10   0    2.18    1.73
 -13  10   0    2.99    1.19
 -13  10   0    2.13    1.65
  12 -10   0   -0.39    0.93
  12 -10   0    1.63    1.30
  12 -10   0   -0.87    1.14
  12 -10   0   -1.67    1.35
 -12  10   0    1.22    1.05
 -12  10   0   -0.35    1.17
 -12  10   0    0.54    1.34
  11 -10   0    1.25    0.87
  11 -10   0    1.08    1.09
  11 -10   0    2.68    1.29
  11 -10   0    2.69    1.32
 -11  10   0    3.34    1.00
 -11  10   0    1.09    1.15
 -11  10   0    1.10    0.98
  10 -10   0    0.67    0.93
  10 -10   0   -1.90    1.02
  10 -10   0    1.31    1.01
  10 -10   0    1.52    0.82
 -10  10   0   -0.05    0.84
 -10  10   0    1.05    0.87
 -10  10   0    0.25    1.06
   9 -10   0   -0.10    0.82
   9 -10   0    3.04    0.96
   9 -10   0    2.11    0.71
   9 -10   0    2.53    1.00
  -9  10   0    1.42    0.77
  -9  10   0    2.39    1.00
  -9  10   0    1.94    0.79
   8 -10   0    5.54    1.13
   8 -10   0    7.01    1.17
   8 -10   0    5.62    0.95
   8 -10   0    6.17    0.89
  -8  10   0    6.73    0.90
  -8  10   0    7.09    1.17
  -8  10   0    6.24    0.95
   7 -10   0    7.50    0.89
   7 -10   0    4.93    0.95
   7 -10   0    8.75    1.18
   7 -10   0    6.49    0.99
  -7  10   0    6.01    0.94
  -7  10   0    7.25    0.92
  -7  10   0    6.72    1.08
   6 -10   0   53.09    2.41
   6 -10   0   50.82    2.49
   6 -10   0   52.18    2.49
   6 -10   0   54.08    2.56
  -6  10   0   47.83    2.39
  -6  10   0   54.49    2.53
  -6  10   0   53.39    2.43
   5 -10   0   65.02    2.86
   5 -10   0   66.45    2.95
   5 -10   0   67.53    2.92
   5 -10   0   66.40    2.86
  -5  10   0   64.53    2.83
  -5  10   0   66.70    2.88
  -5  10   0   69.90    2.93
   4 -10   0   55.51    2.36
   4 -10   0   49.46    2.31
   4 -10   0   51.81    2.39
   4 -10   0   50.05    2.41
  -4  10   0   51.85    2.34
  -4  10   0   55.11    2.37
  -4  10   0   46.25    2.28
   3 -10   0    9.02    0.93
   3 -10   0    8.78    0.91
   3 -10   0    8.61    0.88
  -3  10   0    8.83    0.97
  -3  10   0    7.72    0.86
  -3  10   0    7.89    0.88
   2 -10   0   27.85    1.45
   2 -10   0   27.03    1.47
   2 -10   0   24.30    1.39
  -2  10   0   28.80    1.41
  -2  10   0   27.12    1.42
  -2  10   0   24.85    1.42
   1 -10   0   81.25    3.30
   1 -10   0   83.53    3.38
   1 -10   0   84.12    3.20
  -1  10   0   86.48    3.21
  -1  10   0   83.86    3.38
   0 -10   0   32.83    1.64
   0 -10   0   33.75    1.55
   0 -10   0   32.77    1.62
   0  10   0   35.64    1.58
  -1 -10   0    6.41    0.72
  -1 -10   0    5.94    0.68
  -1 -10   0    6.88    0.78
   1  10   0    5.81    0.73
   1  10   0    7.11    0.81
  -2 -10   0    3.94    0.55
  -2 -10   0    3.69    0.54
  -2 -10   0    3.74    0.59
   2  10   0    3.88    0.56
   2  10   0    4.99    0.60
  -3 -10   0  105.50    3.99
  -3 -10   0  102.61    3.76
  -3 -10   0  104.09    4.12
   3  10   0  106.65    3.97
   3  10   0  108.06    3.80
  -4 -10   0  147.43    5.34
  -4 -10   0  146.77    5.07
   4  10   0  142.22    5.31
   4  10   0  147.29    5.07
  -5 -10   0  107.81    4.03
  -5 -10   0  108.15    3.82
  -5 -10   0  103.29    3.79
   5  10   0  108.65    3.83
   5  10   0  104.73    4.01
  -6 -10   0   59.84    2.38
  -6 -10   0   58.20    2.29
  -6 -10   0   58.68    2.44
  -6 -10   0   57.75    2.28
   6  10   0   58.71    2.30
   6  10   0   57.36    2.43
  -7 -10   0   54.54    2.23
  -7 -10   0   56.83    2.27
  -7 -10   0   55.33    2.31
  -7 -10   0   59.49    2.42
   7  10   0   57.52    2.40
   7  10   0   58.10    2.26
  -8 -10   0   41.77    1.89
  -8 -10   0   40.22    1.75
  -8 -10   0   39.69    1.75
  -8 -10   0   39.54    1.80
   8  10   0   42.02    1.79
   8  10   0   40.63    1.87
   8  10   0   39.07    1.76
  -9 -10   0   49.14    2.16
  -9 -10   0   46.95    2.01
  -9 -10   0   48.14    2.07
  -9 -10   0   46.12    2.00
   9  10   0   48.93    2.10
   9  10   0   46.02    2.03
   9  10   0   47.12    2.01
   9  10   0   49.78    2.16
 -10 -10   0    5.45    0.70
 -10 -10   0    6.66    0.80
 -10 -10   0    5.22    0.67
 -10 -10   0    6.41    0.84
  10  10   0    6.97    0.82
  10  10   0    6.54    0.84
  10  10   0    5.66    0.73
  10  10   0    7.41    0.92
 -11 -10   0   12.56    1.07
 -11 -10   0   14.99    1.17
 -11 -10   0   14.14    1.15
 -11 -10   0   15.68    1.13
  11  10   0   16.21    1.19
  11  10   0   14.97    1.15
  11  10   0   13.22    1.08
  11  10   0   15.69    1.20
 -12 -10   0    2.72    0.69
 -12 -10   0    2.04    0.63
 -12 -10   0    2.87    0.70
 -12 -10   0    3.25    0.72
  12  10   0    2.19    0.62
  12  10   0    2.25    0.64
  12  10   0    1.44    0.64
  12  10   0    4.25    0.86
 -13 -10   0    2.10    0.78
 -13 -10   0    3.11    0.76
 -13 -10   0    2.70    0.71
 -13 -10   0    2.21    0.71
  13  10   0    2.66    0.85
  13  10   0    2.47    0.84
  13  10   0    2.54    0.80
  13  10   0    2.37    0.67
 -14 -10   0   11.61    1.22
 -14 -10   0    8.40    1.18
 -14 -10   0   12.22    1.30
 -14 -10   0    8.04    1.09
  14  10   0   10.66    1.33
  14  10   0   10.70    1.30
  14  10   0    6.76    1.07
  14  10   0    7.61    1.12
 -15 -10   0   22.88    1.70
 -15 -10   0   19.01    1.56
 -15 -10   0   14.89    1.54
 -15 -10   0   16.67    1.51
  15  10   0   17.81    1.64
  15  10   0   21.58    1.72
  15  10   0   18.03    1.58
  15  10   0   18.00    1.59
 -16 -10   0    0.46    0.81
 -16 -10   0    1.62    0.75
 -16 -10   0    2.08    0.82
  16  10   0    2.92    1.06
  16  10   0    2.49    0.97
  16  10   0    2.12    0.91
 -17 -10   0    2.57    0.95
 -17 -10   0    1.37    1.00
 -17 -10   0    3.04    0.86
  17  10   0    3.06    1.06
  17  10   0    1.15    1.06
  17  10   0    2.73    1.17
 -18 -10   0    4.18    1.03
 -18 -10   0    5.73    1.19
 -18 -10   0    4.55    1.19
 -18 -10   0    5.38    1.07
  18  10   0    1.69    1.18
  18  10   0    4.24    1.24
  18  10   0    3.41    1.32
 -19 -10   0    4.98    1.33
 -19 -10   0    3.61    1.24
 -19 -10   0    4.41    1.20
 -19 -10   0    5.80    1.48
  19  10   0    6.31    1.58
  19  10   0    3.67    1.29
  19  10   0    4.82    1.42
 -20 -10   0    1.57    1.60
 -20 -10   0    2.37    1.31
 -20 -10   0    1.57    1.17
 -20 -10   0    2.94    1.23
  20  10   0   -0.19    1.29
  20  10   0    2.26    1.57
  20  10   0   -0.52    1.35
  20  10   0   -1.85    1.59
 -21 -10   0    0.48    1.35
 -21 -10   0    4.10    1.83
 -21 -10   0    5.28    1.60
 -21 -10   0    3.60    1.41
  21  10   0    2.15    1.94
  21  10   0    2.35    1.82
 -22 -10   0   -0.25    1.65
 -22 -10   0   -0.23    2.15
 -22 -10   0   -0.81    1.58
 -22 -10   0    0.17    1.53
  22  10   0    5.00    2.18
  22  10   0    3.22    2.35
  13 -11   0    1.46    1.44
  13 -11   0   -1.64    1.81
  13 -11   0    0.71    1.16
 -13  11   0   -0.04    1.71
 -13  11   0   -0.43    1.27
  12 -11   0   -0.55    0.99
  12 -11   0   -0.55    1.57
  12 -11   0    0.89    1.21
 -12  11   0   -0.29    1.14
 -12  11   0   -0.03    1.42
  11 -11   0    3.93    1.35
  11 -11   0    3.53    1.02
  11 -11   0    3.61    1.51
  11 -11   0    5.89    1.45
 -11  11   0    2.55    1.12
 -11  11   0    4.13    1.20
 -11  11   0    4.99    1.52
  10 -11   0    4.60    1.02
  10 -11   0    3.06    1.30
  10 -11   0    4.56    1.19
  10 -11   0    4.82    1.42
 -10  11   0    1.69    1.01
 -10  11   0    3.17    1.00
 -10  11   0    3.47    1.30
   9 -11   0    4.07    1.06
   9 -11   0    4.93    0.94
   9 -11   0    3.83    1.18
  -9  11   0    4.99    1.00
  -9  11   0    3.04    0.88
  -9  11   0    2.42    1.10
   8 -11   0    4.97    1.10
   8 -11   0    6.43    1.13
   8 -11   0    5.94    0.90
  -8  11   0    5.69    0.95
  -8  11   0    5.48    1.13
   7 -11   0    2.20    0.98
   7 -11   0    3.24    0.76
   7 -11   0    2.44    0.85
   7 -11   0    3.66    0.93
  -7  11   0    3.39    0.78
  -7  11   0    1.39    0.94
   6 -11   0    8.53    1.09
   6 -11   0    8.36    1.15
   6 -11   0   10.97    1.17
   6 -11   0    7.03    1.06
  -6  11   0    6.96    1.06
  -6  11   0    8.06    1.14
  -6  11   0   10.03    1.10
   5 -11   0   14.08    1.34
   5 -11   0   13.43    1.28
   5 -11   0   14.19    1.18
   5 -11   0   13.14    1.36
  -5  11   0   14.50    1.24
  -5  11   0   12.15    1.20
  -5  11   0   13.19    1.35
   4 -11   0   34.41    1.94
   4 -11   0   31.48    1.92
   4 -11   0   36.36    1.95
   4 -11   0   37.62    1.86
  -4  11   0   36.03    1.84
  -4  11   0   30.77    1.79
  -4  11   0   34.63    1.91
   3 -11   0   21.39    1.38
   3 -11   0   19.36    1.41
   3 -11   0   21.50    1.35
  -3  11   0   22.61    1.41
  -3  11   0   20.34    1.34
  -3  11   0   18.89    1.36
   2 -11   0   18.39    1.22
   2 -11   0   16.75    1.22
   2 -11   0   18.85    1.24
  -2  11   0   15.18    1.14
  -2  11   0   18.12    1.21
  -2  11   0   19.16    1.31
   1 -11   0  147.45    5.48
   1 -11   0  140.04    5.30
   1 -11   0  137.93    5.09
  -1  11   0  142.48    5.11
   0 -11   0  230.92    8.11
   0 -11   0  243.50    8.79
   0 -11   0  234.28    8.45
   0  11   0  239.02    8.14
  -1 -11   0   66.01    2.81
  -1 -11   0   64.75    2.58
  -1 -11   0   66.28    2.75
   1  11   0   66.97    2.62
   1  11   0   66.15    2.74
  -2 -11   0    1.51    0.46
  -2 -11   0    0.96    0.43
  -2 -11   0    1.60    0.50
   2  11   0    2.04    0.51
   2  11   0    1.18    0.57
  -3 -11   0   85.81    3.45
  -3 -11   0   88.26    3.25
  -3 -11   0   85.67    3.55
   3  11   0   90.51    3.28
   3  11   0   88.47    3.45
  -4 -11   0   83.92    3.33
  -4 -11   0   85.95    3.13
  -4 -11   0   83.61    3.44
   4  11   0   85.64    3.14
   4  11   0   81.32    3.30
  -5 -11   0   17.89    1.02
  -5 -11   0   15.85    1.12
  -5 -11   0   19.55    1.02
   5  11   0   16.44    1.12
   5  11   0   17.55    1.02
  -6 -11   0   47.51    2.11
  -6 -11   0   49.39    2.02
  -6 -11   0   46.76    1.92
  -6 -11   0   45.62    1.91
   6  11   0   44.24    1.92
   6  11   0   45.74    2.07
  -7 -11   0    1.40    0.43
  -7 -11   0    0.79    0.44
  -7 -11   0    1.37    0.38
  -7 -11   0    1.19    0.39
   7  11   0    1.13    0.44
   7  11   0    2.08    0.53
  -8 -11   0    1.93    0.44
  -8 -11   0    2.19    0.48
  -8 -11   0    1.55    0.46
  -8 -11   0    2.86    0.55
   8  11   0    2.84    0.60
   8  11   0    2.31    0.52
  -9 -11   0    4.37    0.62
  -9 -11   0    4.96    0.77
  -9 -11   0    4.94    0.74
  -9 -11   0    4.57    0.67
   9  11   0    4.85    0.65
   9  11   0    5.34    0.69
   9  11   0    5.62    0.81
 -10 -11   0    8.84    0.96
 -10 -11   0    8.35    0.92
 -10 -11   0    7.19    0.86
 -10 -11   0    7.75    0.82
  10  11   0    8.84    0.91
  10  11   0    8.45    0.88
  10  11   0    9.71    0.96
  10  11   0    7.33    0.88
 -11 -11   0   32.84    1.74
 -11 -11   0   28.74    1.63
 -11 -11   0   30.89    1.63
 -11 -11   0   31.09    1.66
  11  11   0   29.92    1.64
  11  11   0   30.42    1.65
  11  11   0   30.19    1.74
  11  11   0   29.00    1.63
 -12 -11   0    4.74    0.75
 -12 -11   0    4.60    0.79
 -12 -11   0    5.49    0.89
 -12 -11   0    5.27    0.81
  12  11   0    4.58    0.79
  12  11   0    5.35    0.80
  12  11   0    4.48    0.81
  12  11   0    4.82    0.84
 -13 -11   0    3.74    0.82
 -13 -11   0    4.48    0.86
 -13 -11   0    3.46    0.75
 -13 -11   0    5.53    0.92
  13  11   0    4.58    0.89
  13  11   0    4.49    0.85
  13  11   0    3.98    0.95
  13  11   0    2.99    0.72
 -14 -11   0    1.93    0.77
 -14 -11   0    3.51    0.82
 -14 -11   0    2.29    0.83
 -14 -11   0    4.46    0.89
  14  11   0    2.20    0.87
  14  11   0    2.79    0.81
  14  11   0    3.83    0.86
  14  11   0    1.21    0.76
 -15 -11   0    2.92    0.91
 -15 -11   0    3.47    0.96
 -15 -11   0    1.91    0.81
 -15 -11   0    4.32    0.92
  15  11   0    3.35    0.90
  15  11   0    1.65    0.81
  15  11   0    2.99    0.80
 -16 -11   0   -0.20    0.83
 -16 -11   0   -0.64    0.72
 -16 -11   0    2.73    0.83
 -16 -11   0    2.02    1.01
  16  11   0    1.33    0.98
  16  11   0    1.20    0.84
  16  11   0    1.23    0.98
 -17 -11   0    0.43    0.99
 -17 -11   0    0.51    0.88
 -17 -11   0    2.23    0.97
  17  11   0    2.27    1.01
  17  11   0    0.74    1.01
  17  11   0    3.61    1.15
 -18 -11   0    8.45    1.29
 -18 -11   0    5.85    1.25
 -18 -11   0    7.03    1.23
  18  11   0    7.22    1.33
  18  11   0    5.92    1.24
  18  11   0    7.78    1.64
 -19 -11   0    9.55    1.45
 -19 -11   0    7.12    1.26
 -19 -11   0    8.11    1.25
 -19 -11   0    7.96    1.58
  19  11   0    7.52    1.58
  19  11   0    5.13    1.40
  19  11   0    8.61    1.57
 -20 -11   0    4.50    1.28
 -20 -11   0    4.72    1.43
 -20 -11   0    2.09    1.64
 -20 -11   0    2.55    1.23
  20  11   0    2.00    1.42
  20  11   0    0.34    1.42
  20  11   0    4.79    1.56
  20  11   0    4.88    1.74
 -21 -11   0   -0.23    1.31
 -21 -11   0    0.32    1.40
 -21 -11   0    0.09    1.72
 -21 -11   0   -0.40    1.38
  21  11   0    0.54    1.78
  21  11   0    3.37    1.92
 -22 -11   0   -2.28    1.43
 -22 -11   0   -0.74    2.12
 -22 -11   0    0.41    1.70
 -22 -11   0    1.87    1.65
  22  11   0    1.77    2.13
  13 -12   0    1.12    2.17
  13 -12   0    1.09    1.74
 -13  12   0   -0.25    1.36
 -13  12   0    0.97    2.05
  12 -12   0    1.50    1.54
  12 -12   0    0.02    1.13
  12 -12   0   -3.70    1.72
 -12  12   0   -2.27    1.66
 -12  12   0   -0.92    1.16
  11 -12   0    0.20    1.48
  11 -12   0    1.42    1.40
  11 -12   0    2.39    1.10
 -11  12   0    1.84    1.16
 -11  12   0    2.33    1.67
  10 -12   0    3.74    1.39
  10 -12   0    2.94    1.47
  10 -12   0    2.27    1.53
  10 -12   0    3.88    1.05
 -10  12   0    0.50    1.08
 -10  12   0    3.47    1.50
 -10  12   0    3.47    1.06
   9 -12   0    7.56    1.15
   9 -12   0    6.34    1.43
   9 -12   0    7.39    1.34
   9 -12   0    5.78    1.37
  -9  12   0    5.66    1.36
  -9  12   0    4.25    1.05
  -9  12   0    6.68    1.13
   8 -12   0    3.53    0.90
   8 -12   0    3.61    1.00
   8 -12   0    4.03    1.19
  -8  12   0    2.43    1.07
  -8  12   0    3.49    0.88
   7 -12   0    5.69    1.18
   7 -12   0    6.71    0.98
   7 -12   0    6.60    1.08
  -7  12   0    6.27    0.97
  -7  12   0    5.16    1.21
   6 -12   0   10.98    1.25
   6 -12   0    6.72    1.11
   6 -12   0    8.78    1.18
  -6  12   0    9.25    1.21
  -6  12   0   10.84    1.24
   5 -12   0    2.59    0.87
   5 -12   0    1.60    0.83
   5 -12   0    2.98    0.74
   5 -12   0    2.04    0.71
  -5  12   0    2.09    0.66
  -5  12   0    2.46    0.90
  -5  12   0    2.22    0.72
   4 -12   0    9.80    1.20
   4 -12   0    7.79    1.02
   4 -12   0    8.24    1.07
   4 -12   0    6.81    1.05
  -4  12   0    7.70    1.05
  -4  12   0    9.77    1.15
  -4  12   0    7.12    0.94
   3 -12   0   14.35    1.20
   3 -12   0   13.21    1.28
   3 -12   0   12.65    1.25
  -3  12   0   14.19    1.21
  -3  12   0   15.73    1.30
  -3  12   0   12.36    1.17
   2 -12   0   10.07    1.07
   2 -12   0   11.50    1.07
   2 -12   0   10.97    1.11
  -2  12   0   11.83    1.05
  -2  12   0   11.21    1.05
  -2  12   0   13.11    1.22
   1 -12   0   85.95    3.60
   1 -12   0   85.09    3.39
   1 -12   0   89.10    3.54
  -1  12   0   87.66    3.43
   0 -12   0  213.26    7.81
   0 -12   0  211.13    7.51
   0 -12   0  222.17    8.13
   0  12   0  219.18    7.53
  -1 -12   0  112.69    4.34
  -1 -12   0  111.15    4.13
  -1 -12   0  111.59    4.44
   1  12   0  111.34    4.13
   1  12   0  111.17    4.31
  -2 -12   0    1.25    0.61
  -2 -12   0    1.63    0.49
  -2 -12   0    1.39    0.56
   2  12   0    1.61    0.63
   2  12   0    1.59    0.51
  -3 -12   0   11.79    1.03
  -3 -12   0   13.56    0.94
  -3 -12   0   10.69    0.98
   3  12   0   13.62    0.96
   3  12   0   12.09    1.04
  -4 -12   0   16.47    1.15
  -4 -12   0   18.38    1.05
  -4 -12   0   16.29    1.15
   4  12   0   15.63    1.12
   4  12   0   17.71    1.06
  -5 -12   0    4.74    0.63
  -5 -12   0    4.60    0.70
  -5 -12   0    5.94    0.74
  -5 -12   0    6.21    0.69
   5  12   0    6.33    0.69
   5  12   0    7.13    0.86
  -6 -12   0   50.82    2.08
  -6 -12   0   49.53    2.14
  -6 -12   0   50.06    2.24
  -6 -12   0   47.95    2.04
   6  12   0   48.01    2.20
   6  12   0   49.73    2.08
  -7 -12   0   50.48    2.22
  -7 -12   0   47.51    2.11
  -7 -12   0   47.47    2.04
  -7 -12   0   48.58    2.04
   7  12   0   46.72    2.18
   7  12   0   48.25    2.05
  -8 -12   0   38.50    1.78
  -8 -12   0   38.48    1.92
  -8 -12   0   39.48    1.79
  -8 -12   0   39.61    1.85
   8  12   0   38.52    1.90
   8  12   0   38.10    1.77
  -9 -12   0   12.88    1.06
  -9 -12   0   12.64    1.11
  -9 -12   0   12.76    1.10
  -9 -12   0   11.81    1.00
   9  12   0   12.73    1.09
   9  12   0   10.84    0.98
 -10 -12   0   16.12    1.28
 -10 -12   0   14.60    1.18
 -10 -12   0   14.10    1.05
 -10 -12   0   12.06    1.13
  10  12   0   13.11    1.11
  10  12   0   12.02    1.17
  10  12   0   14.22    1.07
 -11 -12   0   19.76    1.35
 -11 -12   0   20.62    1.39
 -11 -12   0   22.24    1.48
 -11 -12   0   20.40    1.38
  11  12   0   24.38    1.50
  11  12   0   21.92    1.42
  11  12   0   21.52    1.39
  11  12   0   20.04    1.35
 -12 -12   0   14.90    1.35
 -12 -12   0   15.09    1.32
 -12 -12   0   16.05    1.36
 -12 -12   0   15.43    1.22
  12  12   0   11.08    1.22
  12  12   0   16.45    1.42
  12  12   0   15.31    1.32
  12  12   0   16.65    1.32
 -13 -12   0    3.95    0.81
 -13 -12   0    4.66    0.84
 -13 -12   0    4.96    0.89
 -13 -12   0    4.00    0.83
  13  12   0    3.96    0.94
  13  12   0    4.60    0.89
  13  12   0    3.26    0.84
  13  12   0    4.83    0.91
 -14 -12   0    4.17    0.89
 -14 -12   0    3.68    0.88
 -14 -12   0    4.73    0.92
 -14 -12   0    5.05    0.95
  14  12   0    4.26    0.95
  14  12   0    2.81    0.88
  14  12   0    4.71    0.79
  14  12   0    4.89    1.01
 -15 -12   0    1.80    0.76
 -15 -12   0    1.98    0.80
 -15 -12   0    2.38    0.97
 -15 -12   0    3.56    0.94
  15  12   0    3.84    0.91
  15  12   0    1.77    0.84
  15  12   0    2.43    0.92
 -16 -12   0    0.86    0.79
 -16 -12   0    1.67    0.88
 -16 -12   0    1.62    0.86
 -16 -12   0    2.26    0.96
  16  12   0    1.44    1.06
  16  12   0    1.22    0.97
  16  12   0    2.71    0.93
 -17 -12   0    2.34    1.10
 -17 -12   0    3.85    1.09
 -17 -12   0    3.56    1.13
 -17 -12   0    5.01    1.10
  17  12   0    2.96    0.98
  17  12   0    4.86    1.26
  17  12   0    3.54    1.11
 -18 -12   0    4.57    1.29
 -18 -12   0    4.75    1.14
 -18 -12   0    5.12    1.22
  18  12   0    3.24    1.21
  18  12   0    5.55    1.28
 -19 -12   0    3.45    1.41
 -19 -12   0    5.35    1.27
 -19 -12   0    6.43    1.36
  19  12   0    5.67    1.34
  19  12   0    6.59    1.52
  19  12   0    4.95    1.30
 -20 -12   0    3.73    1.57
 -20 -12   0    5.54    1.50
 -20 -12   0    4.55    1.32
 -20 -12   0    7.12    1.40
  20  12   0    5.62    1.65
  20  12   0    3.93    1.58
  20  12   0    5.20    1.51
  20  12   0    5.96    1.97
 -21 -12   0    0.73    1.33
 -21 -12   0    2.41    1.53
 -21 -12   0    0.90    1.32
 -21 -12   0    0.02    1.79
  21  12   0    3.04    1.94
  21  12   0   -0.86    1.69
 -22 -12   0    2.69    1.49
 -22 -12   0    1.60    1.65
 -22 -12   0   -2.60    1.98
 -22 -12   0    0.14    1.52
  22  12   0    2.64    2.14
  12 -13   0    4.16    1.67
  12 -13   0   -1.66    2.13
  12 -13   0    0.93    1.32
 -12  13   0    0.21    1.91
 -12  13   0    2.49    1.40
  11 -13   0   -0.73    1.16
  11 -13   0    2.52    1.50
  11 -13   0    2.62    1.69
 -11  13   0    0.07    1.20
 -11  13   0   -0.48    1.62
  10 -13   0    3.94    1.69
  10 -13   0    1.96    1.31
  10 -13   0    3.21    1.11
  10 -13   0    0.50    1.59
 -10  13   0    1.21    1.50
 -10  13   0    2.82    1.15
   9 -13   0    6.11    1.51
   9 -13   0    5.50    1.18
   9 -13   0    4.64    1.47
   9 -13   0    6.25    1.37
  -9  13   0    6.78    1.20
  -9  13   0    5.13    1.27
  -9  13   0    5.75    1.45
   8 -13   0    4.23    1.37
   8 -13   0    4.44    1.05
   8 -13   0    3.16    1.28
   8 -13   0    3.97    1.14
  -8  13   0    5.12    1.09
  -8  13   0    4.66    1.29
   7 -13   0    3.03    1.06
   7 -13   0    3.28    1.15
   7 -13   0    4.20    0.93
  -7  13   0    2.12    1.08
  -7  13   0    3.47    0.96
   6 -13   0   12.10    1.53
   6 -13   0   15.49    1.54
   6 -13   0   15.17    1.71
  -6  13   0   16.14    1.50
  -6  13   0   13.55    1.66
   5 -13   0   16.89    1.38
   5 -13   0   14.56    1.57
   5 -13   0   12.83    1.44
  -5  13   0   12.86    1.35
  -5  13   0   14.44    1.66
   4 -13   0   18.95    1.60
   4 -13   0   20.27    1.46
   4 -13   0   21.02    1.69
   4 -13   0   19.35    1.53
  -4  13   0   19.53    1.51
  -4  13   0   20.70    1.70
   3 -13   0    4.00    0.78
   3 -13   0    3.75    0.88
   3 -13   0    4.17    0.79
  -3  13   0    3.65    0.76
  -3  13   0    4.00    0.81
  -3  13   0    3.97    0.87
   2 -13   0    1.35    0.66
   2 -13   0    1.81    0.64
   2 -13   0    2.85    0.72
  -2  13   0    2.05    0.65
  -2  13   0    2.00    0.74
   1 -13   0   29.12    1.63
   1 -13   0   27.56    1.65
   1 -13   0   29.54    1.69
  -1  13   0   26.87    1.66
   0 -13   0  139.47    5.34
   0 -13   0  138.87    5.12
   0 -13   0  144.04    5.52
   0  13   0  138.28    5.13
  -1 -13   0   79.87    3.30
  -1 -13   0   76.44    3.12
  -1 -13   0   83.71    3.39
   1  13   0   77.88    3.27
   1  13   0   76.67    3.12
  -2 -13   0    4.05    0.72
  -2 -13   0    4.05    0.68
  -2 -13   0    4.45    0.69
   2  13   0    3.89    0.74
   2  13   0    3.93    0.67
  -3 -13   0    6.81    0.91
  -3 -13   0    7.69    0.85
  -3 -13   0    7.12    0.91
   3  13   0    8.29    0.96
   3  13   0    9.08    0.94
  -4 -13   0    3.34    0.61
  -4 -13   0    2.69    0.59
  -4 -13   0    3.36    0.67
   4  13   0    3.54    0.68
   4  13   0    3.18    0.61
  -5 -13   0    5.08    0.72
  -5 -13   0    5.25    0.76
  -5 -13   0    3.97    0.63
   5  13   0    4.32    0.67
   5  13   0    5.63    0.73
  -6 -13   0   26.93    1.46
  -6 -13   0   29.27    1.45
  -6 -13   0   27.81    1.50
  -6 -13   0   30.08    1.60
   6  13   0   28.66    1.49
   6  13   0   28.25    1.61
  -7 -13   0   54.04    2.25
  -7 -13   0   52.38    2.39
  -7 -13   0   52.56    2.23
  -7 -13   0   51.43    2.31
   7  13   0   53.08    2.23
   7  13   0   52.27    2.41
  -8 -13   0   70.82    2.89
  -8 -13   0   67.04    2.75
  -8 -13   0   65.26    2.75
  -8 -13   0   71.94    2.99
   8  13   0   67.88    2.96
   8  13   0   69.21    2.78
  -9 -13   0   70.94    2.92
  -9 -13   0   74.97    3.16
  -9 -13   0   71.77    3.03
  -9 -13   0   72.60    2.94
   9  13   0   73.79    2.97
   9  13   0   73.60    3.12
 -10 -13   0   16.58    1.29
 -10 -13   0   16.52    1.35
 -10 -13   0   16.37    1.22
 -10 -13   0   18.03    1.22
  10  13   0   17.63    1.29
  10  13   0   16.18    1.36
 -11 -13   0   24.61    1.58
 -11 -13   0   22.98    1.49
 -11 -13   0   24.74    1.49
 -11 -13   0   25.51    1.63
  11  13   0   25.04    1.51
  11  13   0   22.83    1.48
  11  13   0   25.16    1.66
 -12 -13   0   21.26    1.47
 -12 -13   0   19.84    1.46
 -12 -13   0   20.90    1.42
 -12 -13   0   20.83    1.58
  12  13   0   21.15    1.44
  12  13   0   21.41    1.59
  12  13   0   22.06    1.41
 -13 -13   0    8.49    1.03
 -13 -13   0    9.54    1.17
 -13 -13   0    9.86    1.25
 -13 -13   0    6.98    0.91
  13  13   0    7.64    1.02
  13  13   0    7.17    1.00
  13  13   0    7.34    0.98
  13  13   0   11.19    1.39
 -14 -13   0    8.22    1.05
 -14 -13   0   10.14    1.18
 -14 -13   0    9.22    1.22
 -14 -13   0    7.59    1.09
  14  13   0    7.23    1.04
  14  13   0    7.57    1.22
  14  13   0    7.69    1.05
  14  13   0    8.73    1.12
 -15 -13   0    3.95    0.86
 -15 -13   0    4.23    0.93
 -15 -13   0    3.53    0.96
 -15 -13   0    3.70    0.96
  15  13   0    3.25    1.04
  15  13   0    5.07    1.01
  15  13   0    3.67    0.99
 -16 -13   0    0.19    0.81
 -16 -13   0    1.65    0.82
 -16 -13   0    1.52    0.95
 -16 -13   0   -0.11    0.86
  16  13   0    2.18    0.80
  16  13   0    3.32    1.17
  16  13   0    2.06    0.96
 -17 -13   0    5.37    1.22
 -17 -13   0    4.44    1.13
 -17 -13   0    4.94    1.14
 -17 -13   0    4.83    1.21
  17  13   0    4.99    1.26
  17  13   0    2.94    1.02
  17  13   0    5.30    1.34
 -18 -13   0    2.66    1.12
 -18 -13   0    4.34    1.32
 -18 -13   0    3.89    1.40
 -18 -13   0    4.72    1.14
  18  13   0    4.20    1.40
  18  13   0    2.98    1.26
 -19 -13   0   -0.11    1.12
 -19 -13   0    1.24    1.20
 -19 -13   0    1.95    1.46
  19  13   0    1.06    1.47
  19  13   0    2.58    1.29
  19  13   0    0.12    1.23
  19  13   0    2.48    1.73
 -20 -13   0    2.89    1.65
 -20 -13   0    3.99    1.36
 -20 -13   0    3.82    1.30
  20  13   0    2.74    1.59
  20  13   0   -1.23    1.38
  20  13   0    1.34    1.45
  20  13   0    0.74    1.81
 -21 -13   0   -1.33    1.26
 -21 -13   0   -1.05    1.40
 -21 -13   0   -2.21    1.74
 -21 -13   0   -1.01    1.29
  21  13   0   -3.58    1.88
  21  13   0    0.52    1.83
 -22 -13   0   -3.27    2.17
 -22 -13   0    3.36    1.90
 -22 -13   0   -0.53    1.51
 -22 -13   0   -0.46    1.45
  22  13   0    2.28    1.97
  11 -14   0   -0.87    1.98
  11 -14   0    0.66    1.61
  11 -14   0    1.56    1.34
 -11  14   0   -0.51    1.29
 -11  14   0   -1.13    1.84
  10 -14   0    0.07    1.72
  10 -14   0    1.61    1.23
  10 -14   0    0.12    1.45
 -10  14   0    0.91    1.67
 -10  14   0    1.01    1.24
   9 -14   0    6.35    1.81
   9 -14   0    5.89    1.26
   9 -14   0    1.73    1.36
   9 -14   0    5.49    1.64
  -9  14   0    5.26    1.27
  -9  14   0    5.92    1.69
   8 -14   0    6.24    1.54
   8 -14   0    7.54    1.59
   8 -14   0    5.80    1.19
   8 -14   0    4.91    1.38
  -8  14   0    6.81    1.56
  -8  14   0    5.89    1.21
  -8  14   0    6.49    1.29
   7 -14   0    3.78    1.14
   7 -14   0    4.14    1.31
   7 -14   0    4.55    1.07
  -7  14   0    3.82    1.03
  -7  14   0    6.06    1.36
   6 -14   0   11.72    1.55
   6 -14   0    9.81    1.34
   6 -14   0   11.39    1.34
  -6  14   0   13.22    1.55
  -6  14   0   11.97    1.46
   5 -14   0   18.79    1.60
   5 -14   0   18.06    1.90
   5 -14   0   15.11    1.63
  -5  14   0   18.85    1.61
  -5  14   0   19.23    1.77
   4 -14   0    8.82    1.20
   4 -14   0    9.89    1.27
   4 -14   0    8.70    1.09
  -4  14   0   11.54    1.34
  -4  14   0    7.91    1.23
   3 -14   0    1.43    0.80
   3 -14   0    1.35    0.84
   3 -14   0    1.28    0.67
  -3  14   0    1.32    0.83
   2 -14   0    0.66    0.73
   2 -14   0    1.67    0.70
   2 -14   0    0.86    0.71
  -2  14   0    0.59    0.77
  -2  14   0    1.19    0.68
   1 -14   0    6.23    0.94
   1 -14   0    4.06    0.78
   1 -14   0    6.03    0.93
  -1  14   0    6.84    0.99
  -1  14   0    4.67    0.77
   0 -14   0   61.13    2.79
   0 -14   0   58.52    2.78
   0 -14   0   61.63    2.71
   0  14   0   64.47    2.74
  -1 -14   0   35.41    1.93
  -1 -14   0   36.13    1.92
  -1 -14   0   34.93    1.83
   1  14   0   33.99    1.82
  -2 -14   0    6.10    0.87
  -2 -14   0    2.88    0.71
  -2 -14   0    3.92    0.71
   2  14   0    5.41    0.81
   2  14   0    4.12    0.72
  -3 -14   0    7.15    0.92
  -3 -14   0    7.59    1.02
  -3 -14   0    8.44    0.94
   3  14   0    9.51    1.03
   3  14   0    6.78    0.96
  -4 -14   0    5.42    0.80
  -4 -14   0    4.55    0.70
  -4 -14   0    5.44    0.81
   4  14   0    5.46    0.79
   4  14   0    6.39    0.93
  -5 -14   0    7.20    0.84
  -5 -14   0    7.19    0.90
  -5 -14   0    4.47    0.79
   5  14   0    6.53    0.96
   5  14   0    6.31    0.80
  -6 -14   0    2.87    0.66
  -6 -14   0    3.91    0.71
  -6 -14   0    3.51    0.65
  -6 -14   0    4.04    0.71
   6  14   0    2.93    0.72
   6  14   0    2.73    0.65
  -7 -14   0    6.50    0.88
  -7 -14   0    5.47    0.78
  -7 -14   0    5.99    0.84
  -7 -14   0    5.70    0.77
   7  14   0    5.54    0.81
   7  14   0    6.93    1.01
  -8 -14   0   64.77    2.76
  -8 -14   0   61.60    2.65
  -8 -14   0   63.21    2.67
  -8 -14   0   67.35    2.89
   8  14   0   62.39    2.83
   8  14   0   63.49    2.67
  -9 -14   0   72.63    3.19
  -9 -14   0   69.71    2.94
  -9 -14   0   72.06    2.98
  -9 -14   0   72.01    3.05
   9  14   0   74.77    3.17
   9  14   0   74.39    3.00
 -10 -14   0    9.73    1.10
 -10 -14   0    9.90    1.04
 -10 -14   0    7.98    0.93
 -10 -14   0    7.34    0.99
  10  14   0    8.69    1.11
  10  14   0    9.52    1.12
 -11 -14   0   14.79    1.31
 -11 -14   0   14.56    1.17
 -11 -14   0   14.78    1.38
 -11 -14   0   12.82    1.21
  11  14   0   14.12    1.34
  11  14   0   15.46    1.32
 -12 -14   0   12.61    1.14
 -12 -14   0   15.51    1.47
 -12 -14   0   14.93    1.39
 -12 -14   0   18.88    1.40
  12  14   0   13.08    1.20
  12  14   0   15.43    1.46
  12  14   0   15.74    1.38
 -13 -14   0   10.80    1.34
 -13 -14   0   11.44    1.13
 -13 -14   0   11.82    1.36
 -13 -14   0   10.34    1.38
  13  14   0    9.92    1.22
  13  14   0   12.71    1.29
  13  14   0   10.13    1.23
 -14 -14   0   10.38    1.18
 -14 -14   0    9.21    1.32
 -14 -14   0   12.25    1.35
 -14 -14   0   10.72    1.26
  14  14   0   12.43    1.32
  14  14   0   12.03    1.47
  14  14   0    9.89    1.14
  14  14   0   11.02    1.45
 -15 -14   0   15.26    1.48
 -15 -14   0   15.00    1.45
 -15 -14   0   13.01    1.56
 -15 -14   0   20.18    1.74
  15  14   0   16.16    1.75
  15  14   0   17.05    1.69
  15  14   0   15.37    1.59
 -16 -14   0   -1.06    0.90
 -16 -14   0   -0.06    0.92
 -16 -14   0   -0.58    0.75
 -16 -14   0   -0.53    0.75
  16  14   0   -0.24    0.98
  16  14   0   -0.62    0.80
  16  14   0   -1.68    0.95
 -17 -14   0    5.01    1.25
 -17 -14   0    4.22    1.13
 -17 -14   0    3.09    1.06
 -17 -14   0    4.39    1.24
  17  14   0    7.34    1.32
  17  14   0    4.99    1.12
 -18 -14   0    0.50    1.04
 -18 -14   0    3.16    1.40
 -18 -14   0    3.47    1.26
 -18 -14   0    4.78    1.25
  18  14   0    0.64    1.37
  18  14   0    1.67    1.01
 -19 -14   0    1.30    1.43
 -19 -14   0   -0.87    1.09
 -19 -14   0   -0.42    1.19
 -19 -14   0    2.08    1.42
  19  14   0    0.20    1.39
  19  14   0   -1.29    1.31
  19  14   0    0.73    1.21
  19  14   0    0.12    1.67
 -20 -14   0    3.08    1.68
 -20 -14   0    2.32    1.32
 -20 -14   0    0.73    1.32
  20  14   0    0.28    1.81
  20  14   0    0.48    1.40
  20  14   0    1.84    1.69
 -21 -14   0   -0.91    1.51
 -21 -14   0    1.19    1.30
 -21 -14   0    0.39    1.38
 -21 -14   0    2.25    1.89
  21  14   0   -1.45    1.76
  21  14   0   -0.20    2.05
 -22 -14   0   -1.00    1.62
 -22 -14   0   -1.05    1.60
 -22 -14   0   -0.10    2.15
 -22 -14   0   -2.36    1.70
  22  14   0   -0.61    2.03
  10 -15   0    0.96    1.38
  10 -15   0   -1.62    1.97
  10 -15   0    0.71    1.56
 -10  15   0   -1.16    1.90
 -10  15   0    0.32    1.27
   9 -15   0    2.04    1.75
   9 -15   0    1.26    1.31
   9 -15   0   -1.21    1.39
  -9  15   0    2.25    1.72
  -9  15   0    1.26    1.24
   8 -15   0    1.20    1.30
   8 -15   0    2.99    1.17
   8 -15   0    2.56    1.65
  -8  15   0    3.24    1.44
  -8  15   0    1.34    1.17
   7 -15   0    3.64    1.44
   7 -15   0    0.87    1.19
   7 -15   0    3.14    1.35
   7 -15   0    2.50    1.10
  -7  15   0    2.78    1.20
  -7  15   0    3.09    1.37
  -7  15   0    3.72    1.14
   6 -15   0    8.28    1.52
   6 -15   0   11.01    1.55
   6 -15   0    8.63    1.32
  -6  15   0    6.44    1.13
  -6  15   0    7.77    1.42
   5 -15   0   10.71    1.23
   5 -15   0    9.35    1.54
   5 -15   0    9.69    1.27
  -5  15   0   10.28    1.48
   4 -15   0    2.30    0.88
   4 -15   0    3.34    0.97
   4 -15   0    3.59    1.17
  -4  15   0    2.92    1.09
   3 -15   0    0.66    0.83
   3 -15   0   -0.18    0.68
   3 -15   0    1.31    0.95
  -3  15   0    0.32    0.94
   2 -15   0    4.74    0.90
   2 -15   0    3.37    0.90
   2 -15   0    1.96    0.85
  -2  15   0    5.73    1.11
   1 -15   0    5.60    0.95
   1 -15   0    3.54    0.88
   1 -15   0    4.28    0.92
  -1  15   0    3.68    0.81
  -1  15   0    2.04    0.84
   0 -15   0   14.60    1.37
   0 -15   0   12.75    1.35
   0 -15   0   12.43    1.38
   0  15   0   13.53    1.37
  -1 -15   0   33.24    1.99
  -1 -15   0   37.64    2.03
  -1 -15   0   34.39    1.89
   1  15   0   36.43    1.94
  -2 -15   0    6.14    0.98
  -2 -15   0    6.47    0.90
  -2 -15   0    3.37    0.77
   2  15   0    4.44    0.90
   2  15   0    5.91    0.87
  -3 -15   0    1.21    0.71
  -3 -15   0    1.63    0.67
  -3 -15   0    1.00    0.58
   3  15   0    1.76    0.64
   3  15   0    1.73    0.69
  -4 -15   0    4.32    0.78
  -4 -15   0    3.87    0.72
  -4 -15   0    3.52    0.78
   4  15   0    4.54    0.77
   4  15   0    3.06    0.66
  -5 -15   0    0.95    0.60
  -5 -15   0    1.69    0.65
  -5 -15   0    2.03    0.67
   5  15   0    0.60    0.62
   5  15   0    1.87    0.75
  -6 -15   0    1.64    0.66
  -6 -15   0    0.80    0.66
  -6 -15   0    0.63    0.53
  -6 -15   0    1.45    0.67
   6  15   0    0.11    0.59
   6  15   0    2.27    0.70
  -7 -15   0    5.54    0.88
  -7 -15   0    6.94    0.93
  -7 -15   0    5.95    0.82
  -7 -15   0    6.73    0.92
  -7 -15   0    7.08    1.05
   7  15   0    5.02    0.84
   7  15   0    7.24    1.01
  -8 -15   0   20.06    1.44
  -8 -15   0   22.49    1.55
  -8 -15   0   21.52    1.46
  -8 -15   0   21.90    1.41
   8  15   0   20.76    1.40
   8  15   0   22.87    1.59
  -9 -15   0   47.76    2.17
  -9 -15   0   45.22    2.32
  -9 -15   0   45.88    2.19
  -9 -15   0   43.88    2.22
   9  15   0   44.28    2.34
   9  15   0   48.11    2.24
 -10 -15   0   15.08    1.36
 -10 -15   0   15.02    1.24
 -10 -15   0   15.32    1.26
 -10 -15   0   15.20    1.40
  10  15   0   15.74    1.33
  10  15   0   12.75    1.38
 -11 -15   0    0.44    0.66
 -11 -15   0    1.63    0.70
 -11 -15   0    1.84    0.75
 -11 -15   0    1.80    0.64
  11  15   0    1.73    0.75
  11  15   0    0.65    0.71
 -12 -15   0    1.74    0.75
 -12 -15   0    2.93    0.87
 -12 -15   0    2.07    0.68
 -12 -15   0    2.87    0.81
  12  15   0    1.52    0.89
  12  15   0    2.29    0.80
 -13 -15   0    3.13    0.82
 -13 -15   0    3.88    0.96
 -13 -15   0    2.99    1.02
 -13 -15   0    5.32    0.92
  13  15   0    3.38    0.91
  13  15   0    3.98    1.02
 -14 -15   0    5.29    1.16
 -14 -15   0    3.47    0.86
 -14 -15   0    5.08    1.04
 -14 -15   0    5.40    1.04
  14  15   0    5.54    1.19
  14  15   0    5.39    0.99
  14  15   0    4.49    1.03
 -15 -15   0   16.01    1.55
 -15 -15   0   11.75    1.40
 -15 -15   0   12.52    1.45
 -15 -15   0   15.79    1.56
  15  15   0   15.79    1.73
  15  15   0   14.14    1.79
 -16 -15   0    0.78    0.87
 -16 -15   0    2.35    0.85
 -16 -15   0    0.88    1.03
 -16 -15   0    3.25    1.12
  16  15   0    4.38    1.12
  16  15   0    1.87    1.08
  16  15   0    3.31    1.01
 -17 -15   0    3.03    1.16
 -17 -15   0    7.56    1.28
 -17 -15   0    5.23    1.33
 -17 -15   0    4.99    1.15
  17  15   0    3.97    1.29
  17  15   0    4.17    1.22
 -18 -15   0    5.88    1.41
 -18 -15   0    5.30    1.26
 -18 -15   0    6.34    1.50
 -18 -15   0    4.12    1.39
  18  15   0    4.59    1.38
  18  15   0    4.20    1.43
  18  15   0    5.16    1.51
 -19 -15   0    1.22    1.16
 -19 -15   0    1.11    1.47
 -19 -15   0   -0.30    1.42
 -19 -15   0    0.62    1.19
  19  15   0    0.56    1.33
  19  15   0   -1.43    1.61
  19  15   0    1.65    1.53
  19  15   0    0.65    1.19
 -20 -15   0    4.75    1.48
 -20 -15   0    5.42    1.79
 -20 -15   0    2.13    1.45
 -20 -15   0    3.91    1.73
  20  15   0    5.33    1.78
  20  15   0    3.17    1.95
  20  15   0    5.02    1.48
 -21 -15   0   -0.96    1.52
 -21 -15   0    1.57    1.89
 -21 -15   0    0.21    1.50
  21  15   0   -0.41    1.98
  21  15   0   -3.98    1.97
 -22 -15   0   -0.81    1.74
 -22 -15   0    3.07    2.26
 -22 -15   0    2.51    1.58
  22  15   0   -1.54    2.09
   9 -16   0    0.47    1.56
   9 -16   0    1.97    1.54
   9 -16   0    2.80    2.06
  -9  16   0    3.00    1.45
  -9  16   0    0.83    1.87
   8 -16   0   -0.08    1.23
   8 -16   0    1.10    1.83
   8 -16   0    1.53    1.38
  -8  16   0    1.83    1.67
   7 -16   0   -1.61    1.15
   7 -16   0   -1.07    1.09
   7 -16   0    1.36    1.48
  -7  16   0   -1.14    1.47
   6 -16   0    1.25    1.44
   6 -16   0    3.48    1.21
   6 -16   0    1.04    1.20
   6 -16   0    1.38    1.15
  -6  16   0    2.10    1.18
  -6  16   0    2.88    1.35
   5 -16   0    0.72    1.38
   5 -16   0    3.23    1.06
   5 -16   0    2.79    1.14
  -5  16   0    2.74    1.26
   4 -16   0    3.11    1.01
   4 -16   0    7.03    1.36
   4 -16   0    3.10    1.05
  -4  16   0    3.70    1.26
   3 -16   0    0.72    0.87
   3 -16   0    1.73    1.04
   3 -16   0    0.74    0.80
  -3  16   0    0.80    1.03
   2 -16   0    5.59    1.01
   2 -16   0    6.90    1.07
   2 -16   0    5.96    1.13
  -2  16   0    5.32    1.14
   1 -16   0    3.47    0.92
   1 -16   0    3.17    0.93
   1 -16   0    3.49    0.90
  -1  16   0    4.08    1.02
   0 -16   0   14.95    1.47
   0 -16   0   15.80    1.59
   0 -16   0   16.81    1.54
   0  16   0   16.24    1.50
  -1 -16   0   18.06    1.56
  -1 -16   0   18.48    1.62
  -1 -16   0   19.70    1.62
   1  16   0   21.00    1.61
  -2 -16   0    8.48    1.07
  -2 -16   0   11.59    1.26
  -2 -16   0   13.43    1.38
   2  16   0   10.06    1.16
   2  16   0   10.76    1.32
  -3 -16   0    2.51    0.69
  -3 -16   0    2.33    0.77
  -3 -16   0    3.34    0.80
   3  16   0    2.81    0.81
   3  16   0    2.78    0.84
  -4 -16   0    1.75    0.70
  -4 -16   0    0.59    0.63
  -4 -16   0    1.19    0.67
   4  16   0    1.66    0.77
   4  16   0    2.26    0.75
  -5 -16   0    2.08    0.71
  -5 -16   0    2.82    0.72
  -5 -16   0    1.86    0.70
   5  16   0    2.78    0.78
   5  16   0    1.87    0.70
  -6 -16   0    3.92    0.76
  -6 -16   0    4.63    0.96
  -6 -16   0    4.74    0.81
  -6 -16   0    4.82    0.85
   6  16   0    3.98    0.81
   6  16   0    5.58    1.01
  -7 -16   0    7.61    0.99
  -7 -16   0    8.50    1.07
  -7 -16   0    7.80    1.05
  -7 -16   0    9.55    1.26
  -7 -16   0    8.50    1.03
   7  16   0    6.56    0.96
   7  16   0    6.98    0.92
  -8 -16   0    4.90    0.86
  -8 -16   0    5.47    0.86
  -8 -16   0    5.59    0.92
  -8 -16   0    4.78    0.84
  -8 -16   0    5.08    0.90
   8  16   0    6.33    0.90
   8  16   0    6.57    1.01
  -9 -16   0   19.53    1.59
  -9 -16   0   18.65    1.33
  -9 -16   0   17.73    1.42
  -9 -16   0   18.16    1.45
   9  16   0   20.14    1.51
   9  16   0   18.70    1.57
 -10 -16   0   19.66    1.41
 -10 -16   0   16.08    1.39
 -10 -16   0   17.70    1.48
 -10 -16   0   16.78    1.51
  10  16   0   17.73    1.49
  10  16   0   17.53    1.52
 -11 -16   0    8.27    1.08
 -11 -16   0    9.02    1.15
 -11 -16   0    8.42    1.06
 -11 -16   0   10.79    1.34
  11  16   0    9.85    1.18
  11  16   0    9.06    1.27
 -12 -16   0   11.12    1.41
 -12 -16   0   10.83    1.35
 -12 -16   0   11.17    1.34
 -12 -16   0    9.71    1.24
  12  16   0   12.14    1.51
  12  16   0   10.20    1.18
 -13 -16   0    2.60    0.93
 -13 -16   0    1.40    0.77
 -13 -16   0    3.43    0.91
 -13 -16   0    2.86    1.05
  13  16   0    2.72    0.99
  13  16   0    2.91    0.93
 -14 -16   0    3.83    0.88
 -14 -16   0    3.81    1.07
 -14 -16   0    4.67    1.03
 -14 -16   0    4.50    1.00
  14  16   0    4.41    1.14
  14  16   0    4.45    1.03
 -15 -16   0    4.28    0.90
 -15 -16   0    3.34    1.03
 -15 -16   0    1.23    0.97
 -15 -16   0    2.78    1.07
  15  16   0    4.39    1.20
  15  16   0    3.40    1.09
 -16 -16   0   -0.38    0.95
 -16 -16   0    0.82    0.90
 -16 -16   0    1.59    1.13
 -16 -16   0   -0.70    0.83
  16  16   0    0.01    1.15
 -17 -16   0   -0.86    1.18
 -17 -16   0    2.18    1.04
 -17 -16   0    4.06    1.16
 -17 -16   0    2.10    1.30
  17  16   0    3.20    1.16
  17  16   0    2.08    1.33
 -18 -16   0    7.77    1.46
 -18 -16   0    5.69    1.52
 -18 -16   0    2.87    1.14
 -18 -16   0    9.86    1.54
  18  16   0    6.04    1.27
  18  16   0    6.38    1.46
  18  16   0    3.77    1.20
  18  16   0    8.33    1.62
 -19 -16   0   -0.98    1.25
 -19 -16   0    3.12    1.35
 -19 -16   0    4.12    1.57
 -19 -16   0    3.13    1.50
  19  16   0    3.90    1.65
  19  16   0   -1.18    1.52
  19  16   0   -1.56    1.30
 -20 -16   0    3.37    1.47
 -20 -16   0    4.58    1.93
 -20 -16   0    3.02    1.43
 -20 -16   0    1.50    1.70
  20  16   0    3.39    1.86
  20  16   0    3.33    1.94
 -21 -16   0    0.68    1.62
 -21 -16   0    1.29    1.58
 -21 -16   0    4.22    1.92
 -21 -16   0    0.31    1.97
  21  16   0   -0.20    1.97
   8 -17   0   -0.06    1.66
   8 -17   0    2.58    2.11
   8 -17   0    1.85    1.48
  -8  17   0    2.61    1.96
   7 -17   0    2.19    1.40
   7 -17   0    5.21    1.93
   7 -17   0    1.97    1.55
  -7  17   0    2.96    1.80
   6 -17   0   -0.47    1.62
   6 -17   0    0.05    1.25
   6 -17   0   -0.03    1.26
  -6  17   0    0.02    1.55
   5 -17   0    1.34    1.28
   5 -17   0    1.64    1.46
   5 -17   0    0.78    1.29
   5 -17   0    2.49    1.13
  -5  17   0    0.74    1.13
  -5  17   0    2.78    1.48
   4 -17   0    3.29    1.39
   4 -17   0    3.47    1.26
   4 -17   0    4.74    1.44
   4 -17   0    5.09    1.15
  -4  17   0    3.35    1.35
  -4  17   0    4.05    1.21
   3 -17   0    2.41    1.03
   3 -17   0    1.69    1.00
   3 -17   0    1.52    1.21
  -3  17   0    1.36    1.16
   2 -17   0    0.65    1.00
   2 -17   0    1.96    0.88
   2 -17   0    2.47    0.96
  -2  17   0    2.53    1.17
   1 -17   0    4.77    1.01
   1 -17   0    5.53    1.05
   1 -17   0    6.26    1.14
  -1  17   0    5.20    1.20
   0 -17   0    8.75    1.24
   0 -17   0    8.79    1.19
   0 -17   0    8.52    1.27
   0  17   0    8.30    1.24
  -1 -17   0    9.73    1.23
  -1 -17   0    9.13    1.20
  -1 -17   0    7.33    1.13
   1  17   0   12.48    1.57
  -2 -17   0    2.36    0.80
  -2 -17   0    3.14    0.90
  -2 -17   0    2.82    0.89
   2  17   0    2.73    0.88
  -3 -17   0    4.30    0.91
  -3 -17   0    4.43    0.95
  -3 -17   0    4.02    0.95
   3  17   0    2.59    0.85
   3  17   0    3.81    0.93
  -4 -17   0    6.66    0.98
  -4 -17   0    6.99    1.08
  -4 -17   0    7.18    1.06
   4  17   0    7.81    1.08
   4  17   0    6.82    1.14
  -5 -17   0   15.56    1.46
  -5 -17   0   18.90    1.58
  -5 -17   0   16.49    1.53
   5  17   0   17.20    1.57
   5  17   0   16.58    1.43
  -6 -17   0   17.22    1.37
  -6 -17   0   16.56    1.44
  -6 -17   0   15.05    1.51
  -6 -17   0   17.15    1.55
   6  17   0   18.08    1.50
   6  17   0   17.93    1.55
  -7 -17   0    6.00    0.96
  -7 -17   0    6.11    0.98
  -7 -17   0    9.11    1.13
  -7 -17   0    6.82    0.94
  -7 -17   0    6.69    1.00
   7  17   0    5.58    1.03
   7  17   0    6.04    0.93
  -8 -17   0    0.52    0.75
  -8 -17   0    0.21    0.64
  -8 -17   0    0.95    0.70
  -8 -17   0    2.14    0.76
  -8 -17   0    1.37    0.78
   8  17   0    0.64    0.81
   8  17   0    1.54    0.68
  -9 -17   0   14.16    1.36
  -9 -17   0   12.49    1.42
  -9 -17   0   10.76    1.36
  -9 -17   0   10.59    1.20
  -9 -17   0   11.35    1.39
   9  17   0   13.40    1.40
   9  17   0   11.44    1.38
 -10 -17   0    4.76    0.86
 -10 -17   0    7.00    1.16
 -10 -17   0    6.16    1.01
 -10 -17   0    6.44    0.95
  10  17   0    7.25    1.07
  10  17   0    7.19    1.12
 -11 -17   0    9.76    1.23
 -11 -17   0   10.42    1.20
 -11 -17   0    9.98    1.31
 -11 -17   0   11.26    1.44
  11  17   0   10.65    1.34
  11  17   0   12.42    1.43
 -12 -17   0   10.46    1.36
 -12 -17   0   12.08    1.58
 -12 -17   0    8.23    1.07
 -12 -17   0    9.11    1.19
  12  17   0    9.83    1.26
  12  17   0   10.88    1.31
 -13 -17   0    9.36    1.24
 -13 -17   0    6.92    1.13
 -13 -17   0   10.07    1.41
 -13 -17   0    8.49    1.23
  13  17   0   10.04    1.29
  13  17   0   12.18    1.44
 -14 -17   0    0.79    0.99
 -14 -17   0    1.31    0.84
 -14 -17   0    1.68    1.02
 -14 -17   0    1.48    0.88
  14  17   0    1.68    1.05
 -15 -17   0   -0.52    0.85
 -15 -17   0   -0.23    1.03
 -15 -17   0   -1.52    0.80
 -15 -17   0   -0.11    1.00
  15  17   0   -0.52    1.06
 -16 -17   0    0.48    1.04
 -16 -17   0    0.94    0.92
 -16 -17   0   -0.76    0.92
 -16 -17   0    0.76    1.15
  16  17   0   -0.48    1.09
 -17 -17   0    0.20    1.04
 -17 -17   0   -0.24    0.98
 -17 -17   0    1.58    1.26
 -17 -17   0    0.51    1.21
  17  17   0   -0.30    1.22
  17  17   0   -1.38    0.98
  17  17   0   -2.60    1.14
 -18 -17   0    3.10    1.22
 -18 -17   0    3.45    1.44
 -18 -17   0    2.20    1.37
 -18 -17   0    0.52    1.07
  18  17   0    1.24    1.46
  18  17   0    1.25    1.48
  18  17   0    3.38    1.21
 -19 -17   0    1.28    1.26
 -19 -17   0   -0.94    1.50
 -19 -17   0    0.01    1.23
 -19 -17   0    3.29    1.49
  19  17   0   -0.72    1.51
  19  17   0   -0.45    1.64
  19  17   0   -1.49    1.36
 -20 -17   0    2.27    1.66
 -20 -17   0    0.09    1.41
 -20 -17   0    2.23    1.53
 -20 -17   0   -0.97    1.72
  20  17   0    2.87    2.15
  20  17   0    0.47    1.87
 -21 -17   0   -1.83    1.60
 -21 -17   0    2.47    1.61
 -21 -17   0    3.13    2.13
 -21 -17   0    2.01    2.11
  21  17   0    1.16    2.12
   7 -18   0    1.24    1.54
   7 -18   0    3.05    2.13
   7 -18   0   -0.80    1.52
  -7  18   0    1.27    1.95
   6 -18   0    0.65    1.43
   6 -18   0   -2.34    1.46
   6 -18   0   -1.30    1.80
  -6  18   0   -1.87    1.74
   5 -18   0    1.52    1.25
   5 -18   0    1.28    1.25
   5 -18   0    2.19    1.59
  -5  18   0    3.45    1.68
   4 -18   0    2.51    1.35
   4 -18   0    2.92    1.20
   4 -18   0    4.49    1.57
   4 -18   0    5.03    1.33
  -4  18   0    4.47    1.21
  -4  18   0    3.93    1.57
   3 -18   0    2.67    1.25
   3 -18   0    3.98    1.22
   3 -18   0    4.21    1.30
   3 -18   0    2.96    1.40
  -3  18   0    1.02    1.07
  -3  18   0    1.94    1.31
   2 -18   0   -0.05    1.00
   2 -18   0   -1.36    1.11
   2 -18   0    0.84    1.04
  -2  18   0    1.62    1.23
  -2  18   0    0.22    0.93
   1 -18   0    1.21    1.05
   1 -18   0    2.23    0.96
   1 -18   0    1.30    1.13
  -1  18   0    2.26    1.14
   0 -18   0    0.65    0.94
   0 -18   0    2.28    1.08
   0 -18   0    1.17    0.92
   0  18   0    3.00    1.13
  -1 -18   0    1.07    0.97
  -1 -18   0    3.18    1.09
  -1 -18   0    2.55    0.91
   1  18   0    1.77    1.02
  -2 -18   0    0.70    0.79
  -2 -18   0    1.46    0.93
  -2 -18   0    0.63    0.80
   2  18   0    0.87    0.87
  -3 -18   0    0.02    0.77
  -3 -18   0   -0.61    0.91
  -3 -18   0    1.21    0.85
   3  18   0   -0.44    0.86
   3  18   0    0.08    0.78
  -4 -18   0    0.73    0.87
  -4 -18   0    1.24    0.83
  -4 -18   0    1.83    0.81
   4  18   0    0.45    0.84
   4  18   0    2.05    0.91
  -5 -18   0   21.67    1.71
  -5 -18   0   24.44    1.82
  -5 -18   0   26.26    1.89
   5  18   0   22.41    1.70
   5  18   0   19.25    1.75
  -6 -18   0   20.63    1.58
  -6 -18   0   20.44    1.72
  -6 -18   0   18.32    1.64
  -6 -18   0   20.08    1.66
   6  18   0   20.81    1.71
  -7 -18   0    3.03    0.89
  -7 -18   0    3.93    0.88
  -7 -18   0    1.40    0.75
  -7 -18   0    3.29    0.93
  -7 -18   0    1.70    0.84
   7  18   0    3.17    0.90
  -8 -18   0    2.39    0.84
  -8 -18   0    1.59    0.77
  -8 -18   0    1.49    0.84
  -8 -18   0    0.75    0.70
  -8 -18   0    1.05    0.87
   8  18   0    0.55    0.79
  -9 -18   0    5.49    0.95
  -9 -18   0    7.52    1.21
  -9 -18   0    7.81    1.09
  -9 -18   0    6.30    1.12
  -9 -18   0    6.46    1.00
   9  18   0    7.92    1.17
 -10 -18   0    1.00    0.73
 -10 -18   0    1.65    0.80
 -10 -18   0    3.27    0.92
 -10 -18   0   -0.18    0.83
  10  18   0    1.43    0.87
 -11 -18   0    1.80    0.85
 -11 -18   0    0.94    0.88
 -11 -18   0    1.32    0.94
 -11 -18   0    0.16    0.78
  11  18   0    0.20    0.88
 -12 -18   0    3.78    0.96
 -12 -18   0    4.07    1.00
 -12 -18   0    2.54    0.97
 -12 -18   0    4.27    0.92
  12  18   0    1.27    0.93
  12  18   0    1.87    0.95
 -13 -18   0    4.61    1.04
 -13 -18   0    4.94    1.13
 -13 -18   0    3.20    1.00
 -13 -18   0    3.39    0.93
  13  18   0    3.87    1.06
 -14 -18   0    2.38    1.17
 -14 -18   0   -0.07    0.96
 -14 -18   0    0.80    0.86
 -14 -18   0    2.10    0.94
  14  18   0    0.81    0.98
 -15 -18   0    1.23    0.99
 -15 -18   0    1.59    0.89
 -15 -18   0    1.76    1.16
 -15 -18   0    1.58    1.01
  15  18   0    3.00    1.23
  15  18   0    1.93    1.26
 -16 -18   0    3.25    1.24
 -16 -18   0    3.65    1.21
 -16 -18   0    3.73    1.42
 -16 -18   0    2.47    1.00
  16  18   0    4.04    1.37
  16  18   0    2.13    1.33
 -17 -18   0    0.61    1.19
 -17 -18   0    3.12    1.16
 -17 -18   0    2.26    1.25
 -17 -18   0    0.78    1.38
  17  18   0    2.02    1.37
  17  18   0    0.41    1.34
 -18 -18   0    0.34    1.36
 -18 -18   0    0.19    1.08
 -18 -18   0    0.62    1.50
 -18 -18   0   -2.92    1.14
  18  18   0    2.04    1.23
  18  18   0   -0.05    1.47
  18  18   0   -0.85    1.46
 -19 -18   0    1.77    1.44
 -19 -18   0   -0.72    1.33
 -19 -18   0    0.78    1.61
 -19 -18   0    2.97    1.58
  19  18   0    0.62    1.70
  19  18   0   -0.87    1.61
 -20 -18   0    0.26    1.86
 -20 -18   0   -1.18    1.42
 -20 -18   0    1.34    1.51
 -20 -18   0    2.29    1.83
  20  18   0   -0.99    1.88
 -21 -18   0    3.15    1.76
 -21 -18   0    1.54    1.59
 -21 -18   0   -0.39    2.04
 -21 -18   0    5.04    2.23
  21  18   0    3.24    2.12
   6 -19   0   -2.05    1.95
  -6  19   0   -1.53    1.87
   5 -19   0    1.59    1.45
   5 -19   0    1.12    1.94
   5 -19   0    2.37    1.63
  -5  19   0    0.11    1.81
   4 -19   0    1.23    1.75
   4 -19   0    1.48    1.53
   4 -19   0    0.33    1.32
  -4  19   0    0.03    1.60
   3 -19   0    3.93    1.63
   3 -19   0    1.89    1.16
   3 -19   0    2.01    1.39
  -3  19   0    0.74    1.42
   2 -19   0    1.68    1.35
   2 -19   0    1.03    1.21
   2 -19   0    0.12    1.06
  -2  19   0    0.41    1.34
  -2  19   0    0.58    1.04
   1 -19   0    0.52    1.21
   1 -19   0    0.51    1.08
   1 -19   0    0.86    1.16
  -1  19   0    2.56    1.02
  -1  19   0    0.60    1.30
   0 -19   0    7.93    1.37
   0 -19   0    7.05    1.35
   0 -19   0    6.50    1.38
   0  19   0    8.73    1.51
   0  19   0    7.63    1.21
  -1 -19   0    9.52    1.51
  -1 -19   0    6.86    1.32
  -1 -19   0    8.14    1.32
   1  19   0    9.01    1.39
  -2 -19   0    3.60    1.12
  -2 -19   0    4.69    1.20
  -2 -19   0    6.09    1.22
   2  19   0    4.95    1.18
  -3 -19   0   -0.43    0.90
  -3 -19   0    0.09    0.83
  -3 -19   0    1.30    0.92
   3  19   0    0.36    1.00
  -4 -19   0    3.72    1.02
  -4 -19   0    2.42    0.85
  -4 -19   0    3.19    1.07
   4  19   0    3.57    1.04
   4  19   0    1.62    0.89
  -5 -19   0   13.07    1.60
  -5 -19   0   12.93    1.64
  -5 -19   0   11.02    1.34
   5  19   0   11.00    1.33
  -6 -19   0   10.98    1.44
  -6 -19   0   15.00    1.63
  -6 -19   0   10.69    1.38
  -6 -19   0   14.74    1.63
   6  19   0   13.60    1.56
  -7 -19   0    2.79    0.86
  -7 -19   0    5.99    1.08
  -7 -19   0    2.95    0.95
  -7 -19   0    5.16    1.02
   7  19   0    5.36    1.14
  -8 -19   0    3.51    1.00
  -8 -19   0    2.56    0.91
  -8 -19   0    3.33    0.94
  -8 -19   0    2.16    0.81
  -8 -19   0    2.08    0.98
   8  19   0    0.60    0.98
  -9 -19   0   10.81    1.41
  -9 -19   0    7.59    1.15
  -9 -19   0    7.87    1.05
  -9 -19   0    6.95    1.12
  -9 -19   0    7.36    1.17
   9  19   0    8.16    1.21
 -10 -19   0    2.17    0.90
 -10 -19   0    3.89    0.89
 -10 -19   0    2.08    0.91
 -10 -19   0    1.77    1.02
 -10 -19   0    2.93    0.91
  10  19   0    2.97    1.01
 -11 -19   0    1.41    0.94
 -11 -19   0   -0.86    0.89
 -11 -19   0   -0.95    0.70
 -11 -19   0   -0.72    0.81
 -11 -19   0   -0.20    0.84
  11  19   0    0.78    1.03
 -12 -19   0   -0.17    0.87
 -12 -19   0    1.06    0.81
 -12 -19   0    0.77    0.93
 -12 -19   0    2.01    0.87
  12  19   0    1.02    0.99
 -13 -19   0    0.27    0.83
 -13 -19   0   -1.05    0.99
 -13 -19   0    2.09    1.13
 -13 -19   0    0.43    0.96
  13  19   0    1.29    1.10
 -14 -19   0    1.66    1.14
 -14 -19   0    0.20    0.88
 -14 -19   0    0.67    1.01
 -14 -19   0    1.60    1.15
  14  19   0    2.52    1.16
  14  19   0    0.06    1.08
 -15 -19   0   -1.49    1.14
 -15 -19   0   -1.08    1.10
 -15 -19   0   -0.51    1.03
 -15 -19   0    0.33    0.98
  15  19   0    1.36    1.29
  15  19   0   -0.59    1.08
 -16 -19   0    4.53    1.20
 -16 -19   0    3.88    1.41
 -16 -19   0    4.34    1.37
 -16 -19   0    2.35    1.35
  16  19   0    3.84    1.39
  16  19   0    1.44    1.43
 -17 -19   0    3.08    1.45
 -17 -19   0    1.75    1.28
 -17 -19   0    4.93    1.28
 -17 -19   0    1.48    1.43
  17  19   0    7.16    1.70
  17  19   0    4.38    1.52
 -18 -19   0    0.00    1.43
 -18 -19   0    1.20    1.50
 -18 -19   0    1.57    1.30
 -18 -19   0    0.77    1.28
  18  19   0   -2.02    1.48
  18  19   0   -3.92    1.50
 -19 -19   0    3.34    1.82
 -19 -19   0    4.08    1.67
 -19 -19   0    1.41    1.50
 -19 -19   0    0.12    1.28
  19  19   0    1.30    1.74
 -20 -19   0    4.31    1.69
 -20 -19   0    1.91    1.94
 -20 -19   0    3.14    1.66
 -20 -19   0    6.25    1.97
  20  19   0    2.06    2.00
   4 -20   0    0.93    1.53
   4 -20   0    0.22    2.05
   4 -20   0   -2.54    1.64
  -4  20   0    2.92    1.89
   3 -20   0    0.56    1.84
   3 -20   0    1.06    1.40
   3 -20   0   -2.19    1.52
  -3  20   0   -1.52    1.69
   2 -20   0    2.54    1.59
   2 -20   0    0.36    1.43
   2 -20   0    1.44    1.34
  -2  20   0   -1.17    1.41
   1 -20   0   -0.52    1.37
   1 -20   0   -1.00    1.17
   1 -20   0    0.13    1.14
  -1  20   0   -0.57    1.39
  -1  20   0    1.64    1.16
   0 -20   0    1.28    1.18
   0 -20   0    0.66    1.17
   0 -20   0   -0.37    1.21
   0  20   0    0.40    0.99
   0  20   0    1.71    1.26
  -1 -20   0    2.70    1.22
  -1 -20   0    1.46    1.22
  -1 -20   0    2.81    1.11
   1  20   0    2.69    1.28
  -2 -20   0    2.05    1.05
  -2 -20   0    2.89    1.16
  -2 -20   0   -0.40    1.12
   2  20   0    1.34    1.18
  -3 -20   0    1.43    1.04
  -3 -20   0   -0.35    1.07
  -3 -20   0    1.90    1.12
   3  20   0    1.92    1.19
  -4 -20   0    8.20    1.40
  -4 -20   0    7.28    1.33
  -4 -20   0    9.19    1.35
   4  20   0    9.23    1.39
   4  20   0   10.34    1.42
  -5 -20   0   11.50    1.46
  -5 -20   0   11.17    1.57
  -5 -20   0   10.59    1.39
   5  20   0    9.13    1.29
   5  20   0   10.13    1.39
  -6 -20   0    4.87    1.04
  -6 -20   0    4.55    1.14
  -6 -20   0    5.89    1.15
  -6 -20   0    6.02    1.20
   6  20   0    6.22    1.22
  -7 -20   0    1.30    0.81
  -7 -20   0    0.14    0.91
  -7 -20   0    2.01    0.99
  -7 -20   0    1.77    0.91
   7  20   0    1.81    1.08
  -8 -20   0    0.40    0.88
  -8 -20   0    1.79    0.97
  -8 -20   0    1.49    0.91
  -8 -20   0    0.28    0.78
  -8 -20   0   -0.60    0.90
   8  20   0   -1.09    0.95
  -9 -20   0    3.72    1.00
  -9 -20   0    1.57    0.93
  -9 -20   0    0.96    0.99
  -9 -20   0    1.95    0.94
  -9 -20   0    1.90    0.86
   9  20   0    1.59    0.99
 -10 -20   0   -0.98    0.96
 -10 -20   0    1.23    0.83
 -10 -20   0    0.75    0.82
 -10 -20   0   -0.82    1.07
 -10 -20   0    1.41    0.92
  10  20   0    0.40    1.04
 -11 -20   0   -1.28    0.88
 -11 -20   0    0.31    0.85
 -11 -20   0    0.23    0.89
 -11 -20   0   -0.25    1.00
 -11 -20   0   -0.31    0.84
  11  20   0    0.68    1.07
 -12 -20   0   -0.13    0.89
 -12 -20   0    1.65    1.13
 -12 -20   0    2.66    0.98
 -12 -20   0    0.39    1.02
 -12 -20   0    1.32    1.04
  12  20   0    1.26    1.09
  12  20   0    1.86    0.97
 -13 -20   0    1.79    1.08
 -13 -20   0    2.93    1.01
 -13 -20   0    3.81    1.27
 -13 -20   0    1.03    1.18
  13  20   0    2.22    1.10
  13  20   0    0.69    1.25
 -14 -20   0    5.63    1.37
 -14 -20   0    1.80    1.27
 -14 -20   0    2.95    1.25
 -14 -20   0    3.38    1.07
  14  20   0    3.39    1.28
  14  20   0    2.05    1.22
 -15 -20   0    3.40    1.19
 -15 -20   0    2.26    1.10
 -15 -20   0    2.46    1.35
 -15 -20   0    2.58    1.32
  15  20   0    2.58    1.35
  15  20   0    2.28    1.43
 -16 -20   0    0.27    1.33
 -16 -20   0    0.66    1.07
 -16 -20   0   -2.22    1.21
 -16 -20   0    0.19    1.38
  16  20   0   -2.93    1.37
  16  20   0    2.91    1.45
 -17 -20   0    0.34    1.39
 -17 -20   0    0.73    1.28
 -17 -20   0    0.66    1.46
 -17 -20   0   -0.41    1.18
  17  20   0    2.14    1.62
  17  20   0    0.01    1.48
 -18 -20   0    1.10    1.36
 -18 -20   0    0.54    1.61
 -18 -20   0    0.80    1.36
 -18 -20   0    0.78    1.52
  18  20   0   -0.18    1.51
 -19 -20   0    2.99    1.44
 -19 -20   0    2.32    1.93
 -19 -20   0    0.11    1.39
 -19 -20   0   -0.45    1.83
  19  20   0    1.53    1.90
 -20 -20   0    2.80    1.72
 -20 -20   0    2.08    1.99
 -20 -20   0    0.32    1.48
 -20 -20   0    2.59    1.84
  20  20   0    2.41    2.04
   3 -21   0    1.37    1.59
   3 -21   0   -1.07    1.62
   3 -21   0    1.61    2.07
  -3  21   0   -0.62    1.88
   2 -21   0    1.92    1.53
   2 -21   0   -2.22    1.37
   2 -21   0    1.82    1.92
  -2  21   0   -1.86    1.79
   1 -21   0    0.66    1.37
   1 -21   0    0.75    1.36
   1 -21   0   -0.50    1.59
  -1  21   0    1.57    1.65
   0 -21   0    4.26    1.38
   0 -21   0    1.77    1.40
   0 -21   0    0.94    1.48
   0  21   0    3.81    1.58
  -1 -21   0   -0.49    1.22
  -1 -21   0   -0.10    1.27
  -1 -21   0    0.15    1.32
   1  21   0   -0.66    1.37
   1  21   0    0.94    1.05
  -2 -21   0    0.15    1.23
  -2 -21   0   -0.37    1.19
  -2 -21   0   -0.36    1.10
   2  21   0    1.35    1.35
  -3 -21   0    0.07    1.11
  -3 -21   0   -0.10    1.23
  -3 -21   0    0.23    1.14
   3  21   0   -0.02    1.28
  -4 -21   0    5.64    1.29
  -4 -21   0    3.55    1.19
  -4 -21   0    4.82    1.34
   4  21   0    5.89    1.35
  -5 -21   0   16.24    1.81
  -5 -21   0   15.02    1.73
  -5 -21   0   14.72    1.75
   5  21   0   17.96    2.08
   5  21   0   14.08    1.64
  -6 -21   0    9.29    1.50
  -6 -21   0    8.52    1.40
  -6 -21   0    8.62    1.27
  -6 -21   0    9.64    1.47
   6  21   0    9.03    1.50
   6  21   0    9.30    1.53
  -7 -21   0    0.86    1.09
  -7 -21   0    2.12    1.08
  -7 -21   0    1.40    0.92
  -7 -21   0    2.24    1.09
   7  21   0    2.92    1.26
  -8 -21   0    2.47    1.00
  -8 -21   0   -0.33    0.99
  -8 -21   0    3.28    0.95
  -8 -21   0    1.33    1.13
  -8 -21   0    2.36    1.16
   8  21   0    0.22    1.14
  -9 -21   0    0.41    0.96
  -9 -21   0    0.36    1.00
  -9 -21   0    1.28    1.10
  -9 -21   0    1.68    1.12
  -9 -21   0    1.41    0.98
   9  21   0    1.21    1.11
 -10 -21   0   -0.36    0.89
 -10 -21   0    3.19    1.11
 -10 -21   0    1.30    0.95
 -10 -21   0    1.42    1.13
 -10 -21   0    2.00    1.30
  10  21   0   -1.50    1.19
 -11 -21   0    0.21    0.94
 -11 -21   0    0.67    1.14
 -11 -21   0    0.66    0.95
 -11 -21   0    1.42    1.10
 -11 -21   0   -0.70    0.86
  11  21   0    0.29    1.23
 -12 -21   0   -0.53    1.06
 -12 -21   0    0.34    1.19
 -12 -21   0    1.36    1.12
 -12 -21   0   -1.32    0.94
 -12 -21   0    0.75    1.10
  12  21   0    1.50    1.25
  12  21   0   -0.11    1.11
 -13 -21   0    2.07    1.14
 -13 -21   0    1.22    1.31
 -13 -21   0   -0.69    1.17
 -13 -21   0    0.35    1.07
 -13 -21   0    1.32    1.19
  13  21   0    3.34    1.18
  13  21   0   -0.73    1.19
 -14 -21   0    2.64    1.40
 -14 -21   0    4.28    1.24
 -14 -21   0    4.42    1.37
  14  21   0    4.95    1.46
  14  21   0    4.68    1.40
 -15 -21   0    7.73    1.40
 -15 -21   0    6.26    1.59
 -15 -21   0    8.62    1.68
 -15 -21   0    5.70    1.28
  15  21   0    6.02    1.57
  15  21   0    7.50    1.57
 -16 -21   0    2.63    1.23
 -16 -21   0   -2.22    1.35
 -16 -21   0    0.95    1.36
 -16 -21   0    1.38    1.50
  16  21   0    0.78    1.53
  16  21   0   -1.10    1.56
 -17 -21   0   -1.61    1.19
 -17 -21   0   -0.26    1.34
 -17 -21   0   -3.82    1.48
 -17 -21   0    0.79    1.58
  17  21   0    0.77    1.51
 -18 -21   0   -2.45    1.39
 -18 -21   0   -0.68    1.38
 -18 -21   0   -1.21    1.65
 -18 -21   0    0.64    1.48
  18  21   0    0.51    1.75
 -19 -21   0   -0.07    1.95
 -19 -21   0   -1.41    1.55
 -19 -21   0   -1.39    1.70
 -19 -21   0   -1.94    1.87
  19  21   0   -0.29    1.91
   1 -22   0    1.36    1.56
   1 -22   0    2.49    1.68
   1 -22   0    2.19    1.98
  -1  22   0    2.88    1.90
   0 -22   0    5.20    1.70
   0 -22   0    4.48    1.86
   0 -22   0    2.24    1.65
   0  22   0    1.88    1.84
  -1 -22   0    0.94    1.49
  -1 -22   0    2.04    1.58
  -1 -22   0    2.88    1.39
   1  22   0   -0.98    1.60
  -2 -22   0    1.88    1.43
  -2 -22   0   -1.16    1.27
  -2 -22   0    0.17    1.43
   2  22   0    2.11    1.60
  -3 -22   0    1.58    1.34
  -3 -22   0    1.88    1.52
  -3 -22   0    5.16    1.34
   3  22   0    1.94    1.55
  -4 -22   0    1.19    1.22
  -4 -22   0    1.82    1.19
  -4 -22   0    1.70    1.36
   4  22   0    1.03    1.33
  -5 -22   0    2.44    1.41
  -5 -22   0    2.59    1.27
  -5 -22   0    3.37    1.25
   5  22   0    4.22    1.44
   5  22   0    3.03    1.30
  -6 -22   0   10.26    1.61
  -6 -22   0   10.77    1.40
  -6 -22   0   10.43    1.56
  -6 -22   0   10.07    1.61
   6  22   0    9.85    1.55
   6  22   0   11.49    1.65
  -7 -22   0    4.52    1.38
  -7 -22   0    4.22    1.34
  -7 -22   0    4.94    1.35
  -7 -22   0    2.74    1.12
   7  22   0    3.71    1.41
   7  22   0    5.44    1.45
  -8 -22   0    1.47    1.22
  -8 -22   0    1.78    1.12
  -8 -22   0    1.84    1.17
  -8 -22   0    0.49    1.16
  -8 -22   0    1.61    1.26
   8  22   0    2.43    1.35
   8  22   0    0.80    1.22
  -9 -22   0   -0.13    1.21
  -9 -22   0    0.93    1.15
  -9 -22   0    0.18    1.06
  -9 -22   0   -1.25    0.96
  -9 -22   0    0.06    1.16
   9  22   0    0.80    1.20
   9  22   0    1.59    1.17
 -10 -22   0   -1.14    1.05
 -10 -22   0   -0.73    0.94
 -10 -22   0   -0.13    1.01
 -10 -22   0    0.33    1.23
 -10 -22   0    0.93    1.24
  10  22   0    1.72    1.33
  10  22   0   -1.81    1.23
 -11 -22   0    2.11    1.11
 -11 -22   0    3.79    1.42
 -11 -22   0    0.55    1.08
 -11 -22   0    1.03    1.21
 -11 -22   0    1.19    1.31
  11  22   0    3.54    1.29
  11  22   0    1.23    1.37
 -12 -22   0    1.96    1.18
 -12 -22   0    2.42    1.16
 -12 -22   0   -0.11    1.30
 -12 -22   0    0.32    1.12
 -12 -22   0    1.23    1.23
  12  22   0    0.74    1.25
  12  22   0    1.91    1.37
 -13 -22   0   -0.23    1.41
 -13 -22   0    0.65    1.23
 -13 -22   0    0.39    1.17
 -13 -22   0    0.77    1.23
 -13 -22   0    3.23    1.33
  13  22   0    1.99    1.39
  13  22   0    1.71    1.32
 -14 -22   0    0.56    1.11
 -14 -22   0    1.73    1.42
 -14 -22   0    3.33    1.46
 -14 -22   0    1.61    1.43
 -14 -22   0    3.90    1.42
  14  22   0    2.94    1.45
  14  22   0    3.01    1.53
 -15 -22   0    5.49    1.68
 -15 -22   0    2.29    1.59
 -15 -22   0    3.67    1.33
 -15 -22   0    4.89    1.58
  15  22   0    3.10    1.61
 -16 -22   0   -1.10    1.57
 -16 -22   0   -1.63    1.50
 -16 -22   0    2.98    1.52
 -16 -22   0    2.34    1.34
  16  22   0    2.14    1.70
 -17 -22   0   -2.07    1.30
 -17 -22   0   -0.74    1.52
 -17 -22   0   -3.06    1.54
 -17 -22   0    0.60    1.69
  17  22   0   -1.42    1.80
 -18 -22   0    1.48    1.87
 -18 -22   0   -0.44    1.61
 -18 -22   0   -0.85    1.41
 -18 -22   0    1.45    1.74
  18  22   0    0.34    1.96
  -1 -23   0    2.93    1.82
  -1 -23   0    2.22    1.83
  -1 -23   0    3.36    1.78
   1  23   0    1.01    1.87
  -2 -23   0    2.79    1.45
  -2 -23   0   -0.67    1.60
  -2 -23   0    0.94    1.68
   2  23   0    3.18    1.81
  -3 -23   0    5.73    1.45
  -3 -23   0    1.91    1.60
  -3 -23   0    2.25    1.73
   3  23   0    4.66    1.74
  -4 -23   0    3.49    1.59
  -4 -23   0    4.18    1.50
  -4 -23   0    2.37    1.65
   4  23   0    3.12    1.73
  -5 -23   0   -1.21    1.14
  -5 -23   0    1.67    1.51
  -5 -23   0    2.06    1.36
   5  23   0   -0.70    1.49
  -6 -23   0    5.81    1.28
  -6 -23   0    9.10    1.54
  -6 -23   0    4.56    1.44
  -6 -23   0    6.01    1.72
   6  23   0    4.06    1.57
  -7 -23   0    6.90    1.29
  -7 -23   0    7.18    1.48
  -7 -23   0    3.41    1.38
  -7 -23   0    5.45    1.58
   7  23   0    7.21    1.61
  -8 -23   0    1.15    1.46
  -8 -23   0    1.29    1.29
  -8 -23   0   -0.73    1.22
  -8 -23   0    0.14    1.10
  -8 -23   0    3.54    1.26
   8  23   0   -0.54    1.39
  -9 -23   0   -0.50    1.32
  -9 -23   0    1.38    1.36
  -9 -23   0   -1.05    1.25
  -9 -23   0   -2.00    1.07
  -9 -23   0   -0.70    1.08
   9  23   0   -0.95    1.35
 -10 -23   0   -0.20    1.32
 -10 -23   0   -1.64    1.05
 -10 -23   0   -0.51    1.33
 -10 -23   0   -1.40    1.34
 -10 -23   0   -1.21    1.10
  10  23   0   -2.49    1.49
 -11 -23   0    2.02    1.36
 -11 -23   0    1.23    1.14
 -11 -23   0   -1.14    1.39
 -11 -23   0   -1.28    1.30
 -11 -23   0    0.55    1.21
  11  23   0    0.86    1.57
 -12 -23   0    1.45    1.26
 -12 -23   0    1.86    1.46
 -12 -23   0   -0.38    1.50
 -12 -23   0    0.23    1.19
 -12 -23   0    0.47    1.23
  12  23   0    2.03    1.63
 -13 -23   0    1.87    1.50
 -13 -23   0    3.32    1.28
 -13 -23   0    3.08    1.38
 -13 -23   0    2.45    1.30
  13  23   0    0.07    1.52
 -14 -23   0    0.50    1.39
 -14 -23   0   -0.96    1.27
 -14 -23   0   -0.61    1.59
 -14 -23   0    1.58    1.41
  14  23   0    1.38    1.60
 -15 -23   0    0.51    1.59
 -15 -23   0    2.82    1.71
 -15 -23   0   -1.61    1.26
 -15 -23   0    3.01    1.62
  15  23   0    0.34    1.64
 -16 -23   0   -1.51    1.71
 -16 -23   0   -0.99    1.28
 -16 -23   0   -1.14    1.71
 -16 -23   0    0.26    1.47
  16  23   0    1.66    1.74
 -17 -23   0   -2.34    1.82
 -17 -23   0    0.26    1.65
 -17 -23   0   -0.83    1.57
 -17 -23   0    2.22    1.41
  17  23   0    3.97    1.93
  -3 -24   0    2.58    1.84
  -3 -24   0    3.72    1.77
  -3 -24   0    0.46    1.82
   3  24   0    2.71    1.96
  -4 -24   0    0.36    1.59
  -4 -24   0    1.08    1.67
  -4 -24   0    2.67    1.89
   4  24   0    1.00    1.78
  -5 -24   0   -0.95    1.38
  -5 -24   0    1.58    1.85
  -5 -24   0   -1.21    1.55
   5  24   0    0.43    1.67
  -6 -24   0    4.77    1.40
  -6 -24   0    7.36    1.66
  -6 -24   0    1.00    1.71
  -6 -24   0    1.84    1.71
   6  24   0    2.60    1.75
  -7 -24   0    3.08    1.78
  -7 -24   0    8.57    1.48
  -7 -24   0    6.25    1.49
  -7 -24   0    2.18    1.57
   7  24   0    6.58    1.82
  -8 -24   0    4.93    1.56
  -8 -24   0    4.15    1.37
  -8 -24   0    2.49    1.62
  -8 -24   0    0.27    1.33
  -8 -24   0    5.77    1.65
   8  24   0    1.23    1.57
  -9 -24   0    4.09    1.50
  -9 -24   0    3.79    1.60
  -9 -24   0    1.06    1.52
  -9 -24   0    3.17    1.60
  -9 -24   0    0.07    1.34
   9  24   0    3.67    1.52
 -10 -24   0   -0.88    1.23
 -10 -24   0    1.48    1.52
 -10 -24   0   -2.89    1.20
 -10 -24   0   -1.43    1.57
  10  24   0    1.29    1.56
 -11 -24   0   -0.59    1.52
 -11 -24   0    2.35    1.38
 -11 -24   0    3.18    1.70
 -11 -24   0    0.85    1.29
  11  24   0    2.75    1.66
 -12 -24   0   -0.43    1.32
 -12 -24   0    0.28    1.34
 -12 -24   0    0.69    1.62
 -12 -24   0    0.85    1.46
  12  24   0    2.87    1.73
 -13 -24   0   -0.47    1.79
 -13 -24   0    0.54    1.37
 -13 -24   0    1.20    1.39
 -13 -24   0    1.87    1.44
  13  24   0   -0.55    1.67
 -14 -24   0    1.51    1.51
 -14 -24   0    2.09    1.48
 -14 -24   0    2.97    1.84
 -14 -24   0    2.88    1.88
  14  24   0    0.79    1.85
 -15 -24   0    2.98    1.73
 -15 -24   0    1.06    1.75
 -15 -24   0    2.26    1.99
 -15 -24   0    2.66    1.48
  15  24   0    2.58    1.88
 -16 -24   0   -3.00    1.46
 -16 -24   0    2.46    1.89
 -16 -24   0   -2.54    1.75
  -6 -25   0    0.75    1.50
  -6 -25   0    2.41    1.56
   6  25   0   -0.37    1.88
  -7 -25   0    1.77    1.99
  -7 -25   0    2.61    1.59
  -7 -25   0    1.95    1.42
  -7 -25   0    3.85    1.55
   7  25   0    4.40    1.93
  -8 -25   0   -0.31    1.44
  -8 -25   0    5.68    1.98
  -8 -25   0    3.94    1.50
  -8 -25   0    2.34    1.58
  -9 -25   0    3.83    1.61
  -9 -25   0    3.48    1.91
  -9 -25   0   -2.24    1.40
  -9 -25   0    2.18    1.64
   9  25   0    3.37    1.76
 -10 -25   0    2.18    1.63
 -10 -25   0   -0.56    1.49
 -10 -25   0   -0.39    1.81
  10  25   0    0.72    1.82
 -11 -25   0   -0.08    1.73
 -11 -25   0    3.91    1.69
 -11 -25   0    2.89    1.47
 -11 -25   0    1.05    1.87
  11  25   0    4.36    1.91
 -12 -25   0    0.65    1.83
 -12 -25   0    1.21    1.62
 -12 -25   0   -1.02    1.58
 -12 -25   0    1.16    1.54
  12  25   0    2.52    2.03
 -13 -25   0    4.01    1.83
 -13 -25   0   -0.16    1.94
 -13 -25   0   -0.37    1.61
 -13 -25   0    1.96    1.70
  13  25   0    3.22    1.99
  11  25  -1    1.65    1.95
 -11 -25   1    2.54    1.52
 -11 -25   1   -1.35    1.78
 -11 -25   1    2.89    1.55
  10  25  -1   -0.69    1.91
 -10 -25   1   -1.72    1.37
 -10 -25   1    1.51    1.93
 -10 -25   1    0.18    1.43
 -10 -25   1    0.72    1.73
   9  25  -1   -0.05    1.83
  -9 -25   1   -0.46    1.44
  -9 -25   1    0.25    1.51
  -9 -25   1   -0.88    1.53
  -9 -25   1   -1.82    1.77
   8  25  -1   -3.72    1.83
  -8 -25   1   -1.14    1.92
  -8 -25   1    2.45    1.68
  -8 -25   1    0.86    1.53
  -8 -25   1   -1.21    1.47
   7  25  -1    3.26    1.90
  -7 -25   1    1.88    1.57
  -7 -25   1    3.69    1.58
  -7 -25   1   -0.34    2.00
 -15 -24   1   -2.58    1.46
 -15 -24   1    3.14    1.78
  14  24  -1    4.63    1.93
 -14 -24   1    4.37    1.79
 -14 -24   1    6.35    1.86
 -14 -24   1    2.15    2.00
 -14 -24   1    2.30    1.62
  13  24  -1    0.00    1.78
 -13 -24   1    4.95    1.77
 -13 -24   1    0.12    1.56
 -13 -24   1   -0.70    1.81
 -13 -24   1    5.08    1.70
  12  24  -1    1.78    1.81
 -12 -24   1    0.33    1.39
 -12 -24   1    3.59    1.59
 -12 -24   1    1.59    1.85
 -12 -24   1    2.13    1.45
  11  24  -1    1.31    1.74
 -11 -24   1   -2.20    1.57
 -11 -24   1    1.90    1.43
 -11 -24   1   -0.09    1.43
 -11 -24   1    2.74    1.33
  10  24  -1   -0.25    1.64
 -10 -24   1   -1.19    1.59
 -10 -24   1    1.64    1.41
 -10 -24   1   -1.18    1.27
 -10 -24   1   -0.91    1.59
   9  24  -1   -0.64    1.48
  -9 -24   1    3.26    1.63
  -9 -24   1    0.23    1.31
  -9 -24   1    2.80    1.72
  -9 -24   1    0.20    1.28
   8  24  -1   -1.99    1.55
  -8 -24   1    0.62    1.29
  -8 -24   1   -0.34    1.65
  -8 -24   1    0.80    1.30
  -8 -24   1   -0.44    1.54
   7  24  -1    3.81    1.74
  -7 -24   1    2.73    1.33
  -7 -24   1    1.76    1.74
  -7 -24   1    4.26    1.47
  -7 -24   1    2.38    1.37
   6  24  -1    0.31    1.81
  -6 -24   1    2.92    1.48
  -6 -24   1    4.08    1.75
  -6 -24   1    7.04    1.81
  -6 -24   1    3.37    1.99
   5  24  -1    0.36    1.73
  -5 -24   1    1.36    1.71
  -5 -24   1    4.02    1.59
  -5 -24   1    0.80    1.76
  -5 -24   1   -1.56    1.37
   4  24  -1   -0.48    1.77
  -4 -24   1    0.42    1.88
  -4 -24   1   -0.71    1.59
  -4 -24   1    0.58    1.70
   3  24  -1    4.19    2.03
  -3 -24   1    1.27    1.93
  -3 -24   1    0.64    1.87
  -3 -24   1    3.86    1.87
  16  23  -1   -0.19    1.90
 -16 -23   1   -1.42    1.76
 -16 -23   1   -2.44    1.36
 -16 -23   1    1.01    1.78
 -16 -23   1   -2.83    1.80
  15  23  -1   -0.96    1.71
 -15 -23   1    3.84    1.87
 -15 -23   1   -0.65    1.78
 -15 -23   1    1.27    1.48
 -15 -23   1    1.14    1.38
  14  23  -1    2.35    1.77
 -14 -23   1    4.28    1.44
 -14 -23   1    1.59    1.80
 -14 -23   1    5.27    1.69
 -14 -23   1    3.38    1.68
  13  23  -1    1.79    1.70
 -13 -23   1    3.61    1.49
 -13 -23   1    1.70    1.71
 -13 -23   1    5.72    1.58
 -13 -23   1    2.84    1.53
  12  23  -1    4.01    1.66
 -12 -23   1    3.37    1.44
 -12 -23   1    1.41    1.32
 -12 -23   1    3.72    1.40
 -12 -23   1    0.38    1.55
  11  23  -1    1.40    1.55
 -11 -23   1    0.19    1.24
 -11 -23   1    1.23    1.27
 -11 -23   1    1.61    1.53
 -11 -23   1    2.23    1.45
  10  23  -1   -0.88    1.50
 -10 -23   1   -0.52    1.36
 -10 -23   1    3.25    1.28
 -10 -23   1   -1.27    1.35
 -10 -23   1   -0.63    1.13
 -10 -23   1   -0.96    1.29
   9  23  -1   -1.45    1.41
  -9 -23   1   -1.40    1.17
  -9 -23   1   -0.41    1.14
  -9 -23   1    0.44    1.45
  -9 -23   1    0.85    1.43
  -9 -23   1   -0.86    1.29
   8  23  -1   -1.13    1.47
  -8 -23   1    1.74    1.37
  -8 -23   1    0.58    1.45
  -8 -23   1    1.81    1.32
  -8 -23   1   -0.37    1.11
  -8 -23   1   -0.53    1.17
   7  23  -1    3.11    1.53
  -7 -23   1   -0.37    1.36
  -7 -23   1    2.09    1.57
  -7 -23   1    1.33    1.22
  -7 -23   1    2.18    1.45
  -7 -23   1    1.52    1.15
   6  23  -1    6.94    1.66
  -6 -23   1    9.00    1.66
  -6 -23   1    5.52    1.55
  -6 -23   1    4.63    1.32
  -6 -23   1    5.92    1.66
   5  23  -1    0.92    1.59
  -5 -23   1    1.74    1.35
  -5 -23   1    0.75    1.63
  -5 -23   1    2.08    1.54
   4  23  -1   -0.46    1.61
  -4 -23   1    1.48    1.60
  -4 -23   1    0.20    1.31
  -4 -23   1    1.16    1.55
   3  23  -1    4.10    1.83
  -3 -23   1    4.90    1.62
  -3 -23   1    2.58    1.64
  -3 -23   1    2.83    1.66
   2  23  -1    2.81    1.83
  -2 -23   1    4.70    1.57
  -2 -23   1    1.77    1.73
  -2 -23   1   -0.17    1.61
   1  23  -1    2.28    1.95
  -1 -23   1    2.01    1.98
  -1 -23   1   -0.53    1.68
  -1 -23   1    1.89    1.81
  17  22  -1   -1.21    1.90
 -17 -22   1    0.76    1.40
 -17 -22   1   -1.99    1.57
 -17 -22   1   -0.58    1.58
 -17 -22   1    1.29    1.82
  16  22  -1   -0.17    1.75
 -16 -22   1    0.94    1.53
 -16 -22   1    2.76    1.59
 -16 -22   1   -0.59    1.70
 -16 -22   1   -1.08    1.42
  15  22  -1    1.10    1.65
 -15 -22   1    1.82    1.65
 -15 -22   1    2.42    1.44
 -15 -22   1    1.91    1.28
 -15 -22   1    4.77    1.70
  14  22  -1    1.35    1.59
 -14 -22   1    1.39    1.60
 -14 -22   1    1.12    1.43
 -14 -22   1    1.41    1.28
 -14 -22   1    0.17    1.31
  13  22  -1   -0.27    1.42
 -13 -22   1    1.60    1.35
 -13 -22   1    0.70    1.49
 -13 -22   1    0.73    1.27
 -13 -22   1    0.75    1.23
  12  22  -1    3.25    1.57
  12  22  -1    2.76    1.29
 -12 -22   1    1.02    1.56
 -12 -22   1    4.11    1.31
 -12 -22   1    1.99    1.30
 -12 -22   1    0.92    1.34
 -12 -22   1    0.72    1.24
  11  22  -1    5.81    1.60
  11  22  -1    6.62    1.51
 -11 -22   1    5.56    1.37
 -11 -22   1    3.92    1.53
 -11 -22   1    2.81    1.26
 -11 -22   1    6.24    1.40
 -11 -22   1    7.06    1.41
  10  22  -1   -0.99    1.27
  10  22  -1   -0.58    1.40
 -10 -22   1    1.66    1.32
 -10 -22   1   -0.09    1.19
 -10 -22   1    3.77    1.17
 -10 -22   1    0.69    1.18
 -10 -22   1    0.59    1.38
   9  22  -1    0.98    1.26
   9  22  -1   -1.79    1.23
  -9 -22   1    1.18    1.21
  -9 -22   1   -0.39    1.16
  -9 -22   1    0.58    1.30
  -9 -22   1   -1.12    1.11
  -9 -22   1   -2.24    1.06
   8  22  -1   -1.28    1.27
   8  22  -1    3.98    1.41
  -8 -22   1    0.94    1.00
  -8 -22   1    2.94    1.25
  -8 -22   1    1.67    1.19
  -8 -22   1    0.66    1.31
  -8 -22   1    4.09    1.23
   7  22  -1    0.69    1.32
   7  22  -1    1.74    1.16
  -7 -22   1    0.18    1.14
  -7 -22   1    1.34    1.18
  -7 -22   1    3.52    1.18
  -7 -22   1    0.53    1.29
  -7 -22   1    1.02    1.19
   6  22  -1    6.33    1.37
   6  22  -1    7.03    1.59
  -6 -22   1    5.74    1.38
  -6 -22   1    4.98    1.47
  -6 -22   1    8.49    1.36
  -6 -22   1    6.50    1.21
   5  22  -1    3.03    1.34
   5  22  -1    4.04    1.45
  -5 -22   1    4.92    1.52
  -5 -22   1    4.61    1.29
  -5 -22   1    2.83    1.36
   4  22  -1    1.64    1.43
  -4 -22   1    1.79    1.38
  -4 -22   1    1.80    1.37
  -4 -22   1    2.66    1.26
   3  22  -1    5.84    1.65
  -3 -22   1    2.84    1.51
  -3 -22   1    6.41    1.39
  -3 -22   1    3.27    1.51
   2  22  -1    3.06    1.58
  -2 -22   1    2.11    1.55
  -2 -22   1    2.02    1.51
  -2 -22   1    3.07    1.36
   1  22  -1   -0.08    1.57
  -1 -22   1    0.76    1.60
  -1 -22   1    0.72    1.56
  -1 -22   1    3.60    1.51
   0  22  -1    5.85    1.89
   0 -22   1    4.93    1.81
   0 -22   1    5.66    1.65
   0 -22   1    3.98    1.78
  -1  22  -1    4.74    2.02
   1 -22   1    4.45    2.02
   1 -22   1    3.86    1.74
   1 -22   1    1.65    1.69
  18  21  -1    0.65    1.88
 -18 -21   1   -0.84    1.61
 -18 -21   1   -2.15    1.41
 -18 -21   1    1.48    1.74
 -18 -21   1   -2.86    1.74
  17  21  -1   -0.55    1.71
 -17 -21   1   -0.22    1.26
 -17 -21   1    0.23    1.74
 -17 -21   1   -1.73    1.42
 -17 -21   1   -0.36    1.47
  16  21  -1    2.35    1.57
 -16 -21   1    1.11    1.33
 -16 -21   1    0.03    1.59
 -16 -21   1   -0.45    1.36
 -16 -21   1    0.30    1.62
  15  21  -1    4.18    1.55
  15  21  -1    3.87    1.83
 -15 -21   1    4.75    1.33
 -15 -21   1    4.58    1.68
 -15 -21   1    4.37    1.56
 -15 -21   1    4.47    1.40
  14  21  -1    4.13    1.43
  14  21  -1    1.69    1.42
 -14 -21   1    5.16    1.43
 -14 -21   1    4.17    1.40
 -14 -21   1    1.12    1.36
 -14 -21   1    1.78    1.27
 -14 -21   1    2.03    1.12
  13  21  -1   -0.08    1.37
  13  21  -1   -1.16    1.22
 -13 -21   1    0.48    1.12
 -13 -21   1    2.66    1.30
 -13 -21   1    1.80    1.24
 -13 -21   1    1.48    1.34
 -13 -21   1    1.80    1.24
  12  21  -1    0.22    1.33
  12  21  -1    1.69    1.13
 -12 -21   1    0.09    1.13
 -12 -21   1   -0.76    1.27
 -12 -21   1    0.49    1.18
 -12 -21   1    0.36    1.05
 -12 -21   1   -0.46    1.02
  11  21  -1    1.99    1.32
 -11 -21   1    1.66    1.04
 -11 -21   1    2.81    1.19
 -11 -21   1    2.11    1.01
 -11 -21   1    2.47    1.25
 -11 -21   1    2.58    1.30
  10  21  -1    2.84    1.32
 -10 -21   1    2.30    1.07
 -10 -21   1    1.83    1.12
 -10 -21   1    2.29    1.17
 -10 -21   1    3.06    1.04
 -10 -21   1    1.71    1.08
   9  21  -1   -2.77    1.06
  -9 -21   1   -1.61    0.91
  -9 -21   1   -1.19    1.03
  -9 -21   1   -1.44    1.00
  -9 -21   1    0.52    0.99
  -9 -21   1   -0.82    0.92
   8  21  -1    3.99    1.30
  -8 -21   1    6.88    1.39
  -8 -21   1    5.26    1.26
  -8 -21   1    6.73    1.37
  -8 -21   1    4.84    1.11
  -8 -21   1    6.17    1.25
   7  21  -1    3.62    1.27
   7  21  -1    2.54    1.11
  -7 -21   1    3.20    1.07
  -7 -21   1    2.51    1.15
  -7 -21   1    2.58    1.18
  -7 -21   1    3.18    1.22
  -7 -21   1    1.87    0.97
   6  21  -1    3.06    1.10
   6  21  -1    2.90    1.32
  -6 -21   1    3.14    1.03
  -6 -21   1    5.21    1.28
  -6 -21   1    5.42    1.28
  -6 -21   1    0.78    1.17
   5  21  -1   10.21    1.61
   5  21  -1   10.84    1.44
  -5 -21   1   10.09    1.56
  -5 -21   1    9.31    1.49
  -5 -21   1   10.86    1.61
   4  21  -1   11.91    1.69
   4  21  -1   12.28    1.63
  -4 -21   1   11.03    1.63
  -4 -21   1   11.67    1.64
  -4 -21   1    9.94    1.59
   3  21  -1    3.78    1.37
  -3 -21   1    3.20    1.42
  -3 -21   1    4.86    1.33
  -3 -21   1    4.58    1.31
   2  21  -1    2.83    1.41
  -2 -21   1    2.38    1.30
  -2 -21   1    0.39    1.28
  -2 -21   1    0.06    1.40
   1  21  -1    1.94    1.51
  -1 -21   1    0.86    1.20
  -1 -21   1    1.83    1.41
  -1 -21   1    0.00    1.39
   0  21  -1    4.57    1.61
   0 -21   1    2.39    1.52
   0 -21   1    1.62    1.39
   0 -21   1    2.36    1.43
  -1  21  -1    2.79    1.66
   1 -21   1   -0.64    1.38
   1 -21   1   -0.64    1.63
   1 -21   1    0.82    1.35
  -2  21  -1    4.16    2.04
   2 -21   1   -0.70    1.48
   2 -21   1    2.09    1.83
   2 -21   1   -0.43    1.52
  -3  21  -1    1.24    1.99
   3 -21   1    1.10    2.05
   3 -21   1    0.54    1.64
   3 -21   1   -0.71    1.80
  19  20  -1   -0.65    2.11
 -19 -20   1    1.05    1.53
 -19 -20   1   -0.57    2.03
 -19 -20   1    2.88    1.92
 -19 -20   1    1.44    1.80
  18  20  -1   -3.09    1.67
 -18 -20   1    2.47    1.72
 -18 -20   1   -0.60    1.44
 -18 -20   1   -3.07    1.33
 -18 -20   1   -1.76    1.73
  17  20  -1   -1.43    1.49
 -17 -20   1   -0.06    1.40
 -17 -20   1   -2.89    1.12
 -17 -20   1   -0.74    1.52
 -17 -20   1    0.09    1.40
  16  20  -1    3.15    1.50
  16  20  -1    0.47    1.54
 -16 -20   1    0.43    1.33
 -16 -20   1   -1.53    1.29
 -16 -20   1    1.80    1.22
 -16 -20   1   -0.29    1.38
  15  20  -1    4.89    1.48
  15  20  -1    4.26    1.54
 -15 -20   1    3.94    1.44
 -15 -20   1    2.01    1.39
 -15 -20   1    3.72    1.40
 -15 -20   1    2.41    1.16
  14  20  -1    4.91    1.43
  14  20  -1    3.41    1.32
 -14 -20   1    5.90    1.32
 -14 -20   1    6.84    1.37
 -14 -20   1    4.77    1.20
 -14 -20   1    4.42    1.50
  13  20  -1    5.05    1.37
  13  20  -1    5.26    1.30
 -13 -20   1    5.16    1.30
 -13 -20   1    2.80    1.24
 -13 -20   1    6.68    1.41
 -13 -20   1    4.53    1.23
  12  20  -1    1.54    1.21
 -12 -20   1    2.85    1.12
 -12 -20   1    1.96    1.03
 -12 -20   1    1.55    0.97
 -12 -20   1    2.56    1.09
 -12 -20   1    2.95    1.21
  11  20  -1    0.57    1.10
 -11 -20   1   -1.11    0.89
 -11 -20   1    0.05    1.06
 -11 -20   1    0.09    0.99
 -11 -20   1    0.69    0.98
 -11 -20   1    0.79    0.96
  10  20  -1    1.19    1.19
 -10 -20   1    3.25    1.18
 -10 -20   1    2.24    0.93
 -10 -20   1    2.97    1.09
 -10 -20   1    2.10    0.95
 -10 -20   1    2.63    1.13
   9  20  -1    0.39    1.03
  -9 -20   1    2.50    1.05
  -9 -20   1    1.56    0.89
  -9 -20   1    0.56    0.90
  -9 -20   1    2.42    1.09
  -9 -20   1    0.52    1.09
   8  20  -1    0.61    0.99
  -8 -20   1    0.51    0.85
  -8 -20   1    2.48    1.08
  -8 -20   1    1.83    1.03
  -8 -20   1    2.75    0.97
  -8 -20   1    1.35    0.93
   7  20  -1    2.88    1.04
  -7 -20   1    0.49    0.95
  -7 -20   1    0.86    0.93
  -7 -20   1    0.12    0.87
  -7 -20   1    1.59    0.87
  -7 -20   1   -1.30    0.88
   6  20  -1   -0.08    0.98
   6  20  -1   -0.03    0.94
  -6 -20   1    1.27    1.03
  -6 -20   1    1.94    0.96
  -6 -20   1    0.14    0.82
  -6 -20   1    0.38    0.98
   5  20  -1    4.74    1.06
   5  20  -1    5.94    1.33
  -5 -20   1    4.59    1.17
  -5 -20   1    6.08    1.32
  -5 -20   1    5.29    1.25
   4  20  -1   11.04    1.45
   4  20  -1   10.94    1.49
  -4 -20   1   13.43    1.57
  -4 -20   1   13.28    1.59
  -4 -20   1    9.21    1.47
   3  20  -1    8.36    1.47
   3  20  -1   10.21    1.42
  -3 -20   1    5.33    1.21
  -3 -20   1    7.93    1.38
  -3 -20   1    9.15    1.41
   2  20  -1    1.51    1.23
  -2 -20   1    1.71    1.07
  -2 -20   1   -0.33    1.00
  -2 -20   1    2.19    1.27
   1  20  -1   -2.20    1.23
  -1 -20   1    1.59    1.13
  -1 -20   1   -0.65    1.22
  -1 -20   1    1.01    1.19
   0  20  -1    0.17    0.98
   0  20  -1    2.27    1.36
   0 -20   1   -1.51    1.21
   0 -20   1    0.81    1.20
   0 -20   1    0.49    1.34
  -1  20  -1    0.56    1.36
  -1  20  -1   -0.32    1.09
   1 -20   1   -0.94    1.34
   1 -20   1    0.05    1.29
   1 -20   1    1.13    1.31
  -2  20  -1   -1.71    1.57
   2 -20   1    1.67    1.30
   2 -20   1   -0.48    1.48
   2 -20   1    3.11    1.51
  -3  20  -1   -1.75    1.60
   3 -20   1    1.41    1.71
   3 -20   1    1.14    1.31
   3 -20   1   -0.29    1.42
  -4  20  -1   -0.89    1.92
   4 -20   1   -0.42    1.44
   4 -20   1    1.46    2.03
   4 -20   1    1.60    1.68
  20  19  -1    2.32    1.98
 -20 -19   1    1.31    1.88
 -20 -19   1    2.01    1.57
 -20 -19   1   -0.52    1.92
 -20 -19   1    3.02    1.72
  19  19  -1    1.63    1.99
 -19 -19   1    1.61    1.54
 -19 -19   1    2.06    1.91
 -19 -19   1    0.23    1.41
 -19 -19   1    5.25    1.76
  18  19  -1   -1.44    1.53
 -18 -19   1    1.12    1.68
 -18 -19   1   -0.68    1.39
 -18 -19   1    1.52    1.67
 -18 -19   1    0.01    1.24
  17  19  -1   -0.52    1.56
  17  19  -1    0.43    1.42
 -17 -19   1    0.97    1.32
 -17 -19   1   -1.49    1.46
 -17 -19   1    1.97    1.22
 -17 -19   1   -1.57    1.18
  16  19  -1   -0.89    1.28
  16  19  -1    1.56    1.54
 -16 -19   1   -0.06    1.00
 -16 -19   1   -0.94    1.28
 -16 -19   1   -1.64    1.17
 -16 -19   1   -1.90    1.28
  15  19  -1    1.82    1.33
  15  19  -1    1.04    1.30
 -15 -19   1   -0.14    1.04
 -15 -19   1   -1.33    1.25
 -15 -19   1    0.91    1.03
 -15 -19   1    0.36    1.30
  14  19  -1    3.07    1.24
  14  19  -1    3.19    1.37
 -14 -19   1    1.95    1.06
 -14 -19   1    3.03    1.29
 -14 -19   1    5.45    1.26
 -14 -19   1    4.91    1.30
  13  19  -1    5.43    1.26
  13  19  -1    4.27    1.32
 -13 -19   1    4.00    1.25
 -13 -19   1    6.90    1.25
 -13 -19   1    7.80    1.27
 -13 -19   1    4.82    1.05
  12  19  -1    4.85    1.21
 -12 -19   1    1.91    1.13
 -12 -19   1    3.46    1.07
 -12 -19   1    4.75    1.12
 -12 -19   1    3.43    0.98
  11  19  -1    1.29    1.04
 -11 -19   1    2.32    1.07
 -11 -19   1    1.25    0.84
 -11 -19   1    1.54    1.01
 -11 -19   1    0.84    0.94
 -11 -19   1    2.74    0.97
  10  19  -1    9.07    1.31
 -10 -19   1    5.71    1.07
 -10 -19   1    7.13    1.06
 -10 -19   1    7.08    1.09
 -10 -19   1    8.66    1.30
 -10 -19   1    6.52    1.31
   9  19  -1   13.29    1.70
  -9 -19   1   14.36    1.72
  -9 -19   1   13.34    1.72
  -9 -19   1   14.60    1.73
  -9 -19   1   10.15    1.21
  -9 -19   1   12.72    1.54
   8  19  -1    4.29    1.08
  -8 -19   1    7.54    1.22
  -8 -19   1    4.48    0.95
  -8 -19   1    4.76    1.03
  -8 -19   1    4.81    1.11
  -8 -19   1    5.52    1.21
   7  19  -1    0.15    0.89
  -7 -19   1    0.08    0.84
  -7 -19   1   -1.40    0.81
  -7 -19   1    1.49    0.78
  -7 -19   1   -1.28    0.74
  -7 -19   1   -0.59    0.84
   6  19  -1    2.05    1.00
  -6 -19   1    4.09    1.01
  -6 -19   1    2.59    0.86
  -6 -19   1    2.93    1.01
  -6 -19   1    2.25    0.91
   5  19  -1    0.03    0.99
   5  19  -1   -0.91    0.78
  -5 -19   1   -1.04    0.78
  -5 -19   1    0.30    0.88
  -5 -19   1    1.38    0.98
   4  19  -1    5.05    1.15
   4  19  -1    3.86    0.98
  -4 -19   1    3.96    1.09
  -4 -19   1    5.08    1.21
  -4 -19   1    3.30    1.07
   3  19  -1    5.25    1.19
   3  19  -1    3.45    0.97
  -3 -19   1    4.78    1.21
  -3 -19   1    4.70    1.04
  -3 -19   1    4.03    1.05
   2  19  -1    1.99    1.11
  -2 -19   1    1.72    1.00
  -2 -19   1    2.09    1.11
  -2 -19   1    0.14    0.88
   1  19  -1    3.25    1.23
  -1 -19   1    5.19    1.16
  -1 -19   1    2.87    1.19
  -1 -19   1    3.50    1.05
   0  19  -1    6.59    1.35
   0 -19   1    6.40    1.35
   0 -19   1    4.19    1.15
   0 -19   1    5.72    1.31
  -1  19  -1    3.55    1.47
  -1  19  -1    1.64    1.02
   1 -19   1    1.03    1.21
   1 -19   1    3.35    1.11
   1 -19   1    1.76    1.21
  -2  19  -1   -0.39    1.29
  -2  19  -1    0.87    1.00
   2 -19   1    0.32    1.18
   2 -19   1   -0.42    1.23
   2 -19   1    0.60    1.14
  -3  19  -1   -0.77    1.40
   3 -19   1   -2.32    1.32
   3 -19   1   -1.03    1.18
   3 -19   1    0.72    1.53
  -4  19  -1    0.60    1.62
   4 -19   1    0.66    1.59
   4 -19   1    1.39    1.30
   4 -19   1   -1.83    1.29
  -5  19  -1   -1.46    1.83
   5 -19   1    1.62    2.00
   5 -19   1   -0.64    1.57
   5 -19   1    2.17    1.51
  -6  19  -1    1.58    2.04
   6 -19   1    2.69    2.15
   6 -19   1    3.04    1.78
   6 -19   1    1.30    1.71
  20  18  -1   -0.49    2.10
 -20 -18   1    0.53    1.56
 -20 -18   1    4.19    1.92
 -20 -18   1   -0.69    1.92
 -20 -18   1    0.51    1.58
  19  18  -1    0.11    1.69
 -19 -18   1    2.91    1.40
 -19 -18   1    0.66    1.78
 -19 -18   1    7.13    1.89
 -19 -18   1   -0.65    1.38
  18  18  -1    0.53    1.63
  18  18  -1    0.33    1.77
 -18 -18   1    0.00    1.48
 -18 -18   1   -2.30    1.43
 -18 -18   1    0.61    1.22
 -18 -18   1    0.99    1.38
  17  18  -1    1.14    1.36
  17  18  -1   -0.66    1.37
 -17 -18   1   -0.11    1.12
 -17 -18   1    0.20    1.28
 -17 -18   1   -0.09    1.35
 -17 -18   1    1.14    1.40
  16  18  -1    0.50    1.33
  16  18  -1    0.77    1.26
 -16 -18   1   -1.66    1.15
 -16 -18   1    0.37    1.04
 -16 -18   1    1.49    1.16
 -16 -18   1    0.06    1.26
  15  18  -1   -1.26    1.19
  15  18  -1    0.24    1.12
 -15 -18   1    0.47    1.23
 -15 -18   1    0.77    0.91
 -15 -18   1    0.43    1.15
 -15 -18   1    0.70    1.09
  14  18  -1    3.39    1.21
  14  18  -1    3.82    1.18
 -14 -18   1    5.44    1.15
 -14 -18   1    1.73    1.10
 -14 -18   1    2.17    0.94
 -14 -18   1    2.63    1.12
  13  18  -1    9.18    1.36
 -13 -18   1   14.78    1.72
 -13 -18   1    8.05    1.13
 -13 -18   1    8.16    1.35
 -13 -18   1   14.15    1.67
  12  18  -1    6.50    1.22
 -12 -18   1    3.94    0.95
 -12 -18   1    6.72    1.23
 -12 -18   1    5.89    1.23
 -12 -18   1    8.45    1.13
  11  18  -1    0.51    0.94
 -11 -18   1    1.66    1.00
 -11 -18   1   -0.49    0.93
 -11 -18   1    0.16    0.79
 -11 -18   1   -0.63    0.80
  10  18  -1    3.40    0.98
 -10 -18   1    1.61    1.04
 -10 -18   1    1.06    0.86
 -10 -18   1    1.83    0.87
 -10 -18   1    1.87    0.92
 -10 -18   1    2.03    0.88
   9  18  -1   20.05    1.79
  -9 -18   1   26.09    1.76
  -9 -18   1   19.66    1.53
  -9 -18   1   21.60    1.78
  -9 -18   1   19.39    1.77
  -9 -18   1   23.38    1.73
   8  18  -1   12.31    1.41
  -8 -18   1   10.81    1.27
  -8 -18   1   11.81    1.46
  -8 -18   1   12.10    1.40
  -8 -18   1   10.38    1.31
  -8 -18   1    8.44    1.22
   7  18  -1    2.92    0.90
  -7 -18   1    2.74    0.81
  -7 -18   1    1.40    0.89
  -7 -18   1    1.38    0.77
  -7 -18   1    1.63    0.93
  -7 -18   1    1.97    0.80
   6  18  -1   13.55    1.49
  -6 -18   1   12.87    1.38
  -6 -18   1   15.20    1.58
  -6 -18   1   12.96    1.55
  -6 -18   1   12.36    1.41
   5  18  -1   14.01    1.55
   5  18  -1   16.21    1.61
  -5 -18   1   16.81    1.62
  -5 -18   1   15.91    1.48
  -5 -18   1   16.37    1.65
   4  18  -1    1.05    0.88
   4  18  -1    4.29    0.89
  -4 -18   1    1.02    0.91
  -4 -18   1    2.35    0.98
  -4 -18   1    1.94    0.92
   3  18  -1    1.61    0.92
   3  18  -1    0.73    0.77
  -3 -18   1    1.65    0.96
  -3 -18   1    1.50    0.79
  -3 -18   1    0.40    0.78
   2  18  -1    0.58    0.80
   2  18  -1    0.62    0.98
  -2 -18   1    0.14    0.90
  -2 -18   1    1.24    0.93
  -2 -18   1    0.35    0.79
   1  18  -1    1.86    1.01
  -1 -18   1    0.51    0.87
  -1 -18   1    0.98    0.91
  -1 -18   1    0.96    0.96
   0  18  -1    7.70    1.34
   0 -18   1    4.53    1.02
   0 -18   1    7.58    1.24
   0 -18   1    4.47    1.19
  -1  18  -1    7.61    1.39
   1 -18   1    8.37    1.32
   1 -18   1    8.53    1.33
   1 -18   1    6.29    1.34
  -2  18  -1    3.84    1.30
   2 -18   1    2.19    1.25
   2 -18   1    4.15    1.13
   2 -18   1    2.78    1.07
  -3  18  -1    0.90    1.27
  -3  18  -1    2.24    1.05
   3 -18   1    0.50    1.25
   3 -18   1   -0.22    1.17
   3 -18   1   -0.75    1.08
   3 -18   1   -1.35    1.13
  -4  18  -1   -0.15    1.39
  -4  18  -1   -0.10    1.12
   4 -18   1    0.99    1.30
   4 -18   1   -0.46    1.10
   4 -18   1    1.25    1.29
   4 -18   1    2.12    1.49
  -5  18  -1    0.71    1.54
   5 -18   1    0.75    1.29
   5 -18   1    0.76    1.31
   5 -18   1    3.50    1.76
  -6  18  -1   -1.11    1.62
   6 -18   1    3.13    1.49
   6 -18   1   -0.55    1.40
   6 -18   1    0.37    1.82
  -7  18  -1    0.34    1.95
   7 -18   1    1.12    1.61
   7 -18   1   -0.17    1.50
   7 -18   1   -1.95    2.02
 -21 -17   1   -1.10    1.70
 -21 -17   1   -1.18    1.72
 -21 -17   1   -0.68    2.08
 -21 -17   1   -0.68    2.16
  20  17  -1    0.24    1.97
 -20 -17   1   -0.51    1.80
 -20 -17   1    4.64    1.95
 -20 -17   1    1.23    1.58
 -20 -17   1    0.91    1.56
  19  17  -1    1.22    1.73
  19  17  -1    2.43    1.70
 -19 -17   1    0.63    1.37
 -19 -17   1    1.96    1.68
 -19 -17   1    0.39    1.38
 -19 -17   1   -3.46    1.53
  18  17  -1   -0.21    1.43
  18  17  -1   -0.86    1.20
  18  17  -1    3.27    1.59
 -18 -17   1    2.24    1.47
 -18 -17   1    0.08    1.52
 -18 -17   1   -0.96    1.13
 -18 -17   1    1.07    1.25
  17  17  -1   -2.04    1.35
  17  17  -1   -1.18    1.05
  17  17  -1    1.20    1.35
 -17 -17   1   -0.87    1.12
 -17 -17   1    2.02    1.45
 -17 -17   1    0.45    1.38
 -17 -17   1    1.41    1.06
  16  17  -1   -0.41    1.10
  16  17  -1    1.73    1.22
 -16 -17   1   -1.05    0.92
 -16 -17   1   -2.31    1.11
 -16 -17   1   -0.97    1.15
 -16 -17   1    0.03    1.00
  15  17  -1   -0.38    1.11
 -15 -17   1   -1.75    0.99
 -15 -17   1    0.19    0.95
 -15 -17   1    1.17    0.96
 -15 -17   1    0.55    1.12
  14  17  -1    1.00    1.00
 -14 -17   1    1.79    0.98
 -14 -17   1   -0.12    0.98
 -14 -17   1    0.42    0.86
 -14 -17   1    0.61    0.81
  13  17  -1    7.92    1.26
 -13 -17   1    6.61    1.11
 -13 -17   1    8.34    1.21
 -13 -17   1   11.14    1.43
 -13 -17   1    8.49    1.28
  12  17  -1    6.39    1.11
  12  17  -1    6.46    1.12
 -12 -17   1    5.64    1.00
 -12 -17   1    7.35    1.18
 -12 -17   1    6.75    1.23
 -12 -17   1    7.86    1.16
  11  17  -1    0.15    0.84
 -11 -17   1    0.55    0.76
 -11 -17   1   -0.80    0.63
 -11 -17   1    1.57    0.79
 -11 -17   1    0.42    0.73
  10  17  -1    2.70    0.82
 -10 -17   1    1.78    0.85
 -10 -17   1    0.66    0.71
 -10 -17   1    1.47    0.76
 -10 -17   1    2.15    0.85
   9  17  -1    6.90    1.07
  -9 -17   1    5.85    1.14
  -9 -17   1    4.85    1.06
  -9 -17   1    4.32    0.84
  -9 -17   1    6.23    0.98
  -9 -17   1    5.56    0.96
   8  17  -1   12.37    1.30
  -8 -17   1   11.05    1.39
  -8 -17   1   10.96    1.28
  -8 -17   1   11.39    1.20
  -8 -17   1   10.55    1.33
  -8 -17   1    9.14    1.14
   7  17  -1    4.30    0.92
   7  17  -1    2.48    0.91
  -7 -17   1    2.59    0.84
  -7 -17   1    3.69    0.95
  -7 -17   1    2.44    0.84
  -7 -17   1    2.80    0.90
  -7 -17   1    3.80    0.77
   6  17  -1    9.40    1.27
   6  17  -1    9.88    1.17
  -6 -17   1    9.45    1.13
  -6 -17   1    9.55    1.25
  -6 -17   1    7.46    1.00
  -6 -17   1    9.77    1.35
   5  17  -1   20.78    1.70
   5  17  -1   25.07    1.77
  -5 -17   1   21.77    1.73
  -5 -17   1   24.80    1.76
  -5 -17   1   21.06    1.65
   4  17  -1   21.78    1.61
   4  17  -1   19.33    1.59
  -4 -17   1   17.96    1.56
  -4 -17   1   19.20    1.55
  -4 -17   1   19.14    1.68
   3  17  -1    5.93    1.05
   3  17  -1    6.39    1.05
  -3 -17   1    5.57    0.95
  -3 -17   1    5.49    1.01
  -3 -17   1    4.95    1.02
   2  17  -1    2.95    0.98
   2  17  -1    2.30    0.80
  -2 -17   1    2.90    0.96
  -2 -17   1    2.25    0.81
  -2 -17   1    2.08    0.85
   1  17  -1    8.89    1.23
  -1 -17   1    7.50    1.16
  -1 -17   1    7.60    1.09
  -1 -17   1    7.42    1.09
   0  17  -1   10.78    1.34
   0 -17   1    9.50    1.31
   0 -17   1    9.11    1.27
   0 -17   1    6.60    1.16
  -1  17  -1    2.21    1.06
   1 -17   1    4.15    1.02
   1 -17   1    1.62    0.96
   1 -17   1    1.52    0.89
  -2  17  -1    5.44    1.22
   2 -17   1    6.81    1.14
   2 -17   1    6.26    1.23
   2 -17   1    6.68    1.21
  -3  17  -1    0.55    1.20
   3 -17   1    0.47    1.07
   3 -17   1    0.67    1.07
   3 -17   1    0.51    0.92
  -4  17  -1   -1.08    1.14
   4 -17   1    0.07    1.01
   4 -17   1    0.61    1.24
   4 -17   1    2.03    1.16
  -5  17  -1    2.62    1.12
  -5  17  -1    1.70    1.41
   5 -17   1    1.69    1.14
   5 -17   1    1.46    1.22
   5 -17   1    2.34    1.48
   5 -17   1    0.51    1.30
  -6  17  -1   -1.09    1.50
   6 -17   1   -0.48    1.49
   6 -17   1    0.35    1.24
   6 -17   1    0.14    1.25
  -7  17  -1    0.54    1.73
   7 -17   1   -2.34    1.25
   7 -17   1    0.91    1.41
   7 -17   1   -0.82    1.85
  -8  17  -1   -0.65    1.81
   8 -17   1    0.69    1.49
   8 -17   1   -1.38    1.48
   8 -17   1    1.60    2.05
  21  16  -1    1.06    2.08
 -21 -16   1    1.19    1.65
 -21 -16   1    1.57    2.12
 -21 -16   1    0.96    1.76
  20  16  -1    6.02    2.11
 -20 -16   1    2.33    1.61
 -20 -16   1    7.31    2.03
 -20 -16   1    5.16    1.99
 -20 -16   1    7.39    1.75
  19  16  -1    2.82    1.78
  19  16  -1   -0.49    1.69
  19  16  -1    2.42    1.51
 -19 -16   1    1.45    1.37
 -19 -16   1    4.74    1.64
 -19 -16   1    2.29    1.39
 -19 -16   1    1.86    1.71
  18  16  -1    2.64    1.29
  18  16  -1    4.16    1.49
  18  16  -1    0.59    1.40
  18  16  -1   -0.34    1.17
 -18 -16   1    1.41    1.27
 -18 -16   1    4.12    1.47
 -18 -16   1   -0.82    1.43
 -18 -16   1    0.12    1.10
  17  16  -1    1.95    1.32
  17  16  -1    3.15    1.35
 -17 -16   1    0.50    1.06
 -17 -16   1    1.76    1.36
 -17 -16   1   -0.82    1.22
 -17 -16   1   -0.51    1.00
  16  16  -1   -0.31    1.15
 -16 -16   1    0.74    0.95
 -16 -16   1    0.00    1.14
 -16 -16   1    2.19    0.98
 -16 -16   1    1.26    1.11
  15  16  -1    5.63    1.25
 -15 -16   1    3.21    0.97
 -15 -16   1    3.99    1.20
 -15 -16   1    3.45    1.16
 -15 -16   1    2.90    0.97
  14  16  -1    1.09    1.00
  14  16  -1    1.77    1.00
 -14 -16   1    0.65    1.01
 -14 -16   1    1.45    0.84
 -14 -16   1    0.67    0.89
 -14 -16   1    2.19    0.86
  13  16  -1    1.45    0.87
  13  16  -1    0.28    0.89
 -13 -16   1   -0.28    0.88
 -13 -16   1    0.04    0.89
 -13 -16   1    0.52    0.80
 -13 -16   1    0.16    0.70
  12  16  -1    8.33    1.22
  12  16  -1    6.34    1.06
 -12 -16   1    5.97    1.03
 -12 -16   1    5.98    1.00
 -12 -16   1    4.90    0.94
 -12 -16   1    5.54    1.05
  11  16  -1    4.04    0.88
  11  16  -1    3.60    0.93
 -11 -16   1    2.76    0.89
 -11 -16   1    3.94    0.96
 -11 -16   1    3.24    0.81
 -11 -16   1    3.44    0.95
  10  16  -1    6.67    1.09
  10  16  -1    5.59    0.99
 -10 -16   1    5.26    0.89
 -10 -16   1    8.83    1.21
 -10 -16   1    6.68    1.01
 -10 -16   1    6.31    1.01
   9  16  -1   10.40    1.30
   9  16  -1    9.85    1.18
  -9 -16   1    8.95    1.07
  -9 -16   1    6.34    0.95
  -9 -16   1    7.70    0.99
  -9 -16   1    5.93    1.04
   8  16  -1    3.23    0.85
   8  16  -1    4.15    0.83
  -8 -16   1    3.50    0.84
  -8 -16   1    3.70    0.77
  -8 -16   1    4.87    0.88
  -8 -16   1    3.40    0.90
  -8 -16   1    2.87    0.79
   7  16  -1   -1.10    0.59
   7  16  -1   -0.24    0.66
  -7 -16   1   -0.54    0.63
  -7 -16   1    0.90    0.57
  -7 -16   1    0.98    0.64
  -7 -16   1    0.25    0.64
  -7 -16   1    0.21    0.67
   6  16  -1    2.44    0.86
   6  16  -1    1.78    0.77
  -6 -16   1    3.54    0.71
  -6 -16   1    4.15    0.91
  -6 -16   1    2.98    0.78
  -6 -16   1    3.58    0.82
   5  16  -1   10.04    1.16
   5  16  -1   10.48    1.19
  -5 -16   1   10.29    1.23
  -5 -16   1    9.28    1.22
  -5 -16   1    9.98    1.27
   4  16  -1   17.30    1.39
   4  16  -1   16.93    1.44
  -4 -16   1   14.51    1.31
  -4 -16   1   15.25    1.41
  -4 -16   1   19.33    1.50
   3  16  -1    8.66    1.11
   3  16  -1    8.45    1.10
  -3 -16   1    9.73    1.11
  -3 -16   1    7.77    1.04
  -3 -16   1    8.84    1.19
   2  16  -1    2.47    0.83
   2  16  -1    3.69    0.90
  -2 -16   1    3.60    0.86
  -2 -16   1    3.78    0.87
  -2 -16   1    4.20    0.87
   1  16  -1   25.37    1.80
  -1 -16   1   22.55    1.77
  -1 -16   1   25.48    1.72
  -1 -16   1   25.94    1.80
   0  16  -1   38.11    2.25
   0 -16   1   40.76    2.31
   0 -16   1   39.58    2.27
   0 -16   1   39.65    2.21
  -1  16  -1    8.13    1.19
   1 -16   1    9.63    1.22
   1 -16   1    8.89    1.20
   1 -16   1    7.37    1.14
  -2  16  -1    5.55    1.10
   2 -16   1    4.89    1.03
   2 -16   1    6.53    1.09
   2 -16   1    5.28    1.02
  -3  16  -1    0.59    1.02
   3 -16   1    1.62    0.93
   3 -16   1   -0.85    0.96
   3 -16   1    0.93    0.81
  -4  16  -1    1.30    1.19
   4 -16   1    0.08    0.91
   4 -16   1    0.99    1.17
   4 -16   1    0.99    0.86
  -5  16  -1    0.57    1.22
   5 -16   1   -0.44    1.09
   5 -16   1    1.88    1.28
   5 -16   1   -0.94    1.03
  -6  16  -1    2.52    1.38
  -6  16  -1    0.39    1.12
   6 -16   1    0.42    1.22
   6 -16   1    1.85    1.29
   6 -16   1    1.11    1.38
   6 -16   1    0.87    1.12
  -7  16  -1    0.10    1.12
  -7  16  -1    1.63    1.50
   7 -16   1   -2.08    1.14
   7 -16   1   -1.15    1.61
   7 -16   1   -0.49    1.22
   7 -16   1   -0.12    1.47
  -8  16  -1    0.70    1.25
  -8  16  -1    1.97    1.63
   8 -16   1   -3.23    1.31
   8 -16   1   -0.34    1.24
   8 -16   1    2.19    1.73
  -9  16  -1   -0.20    1.36
  -9  16  -1    0.13    1.88
   9 -16   1    0.67    1.42
   9 -16   1    1.39    1.51
   9 -16   1    2.26    2.07
  21  15  -1    1.30    2.05
 -21 -15   1   -0.07    1.58
 -21 -15   1    4.46    1.73
 -21 -15   1    1.11    2.02
  20  15  -1    2.16    1.84
  20  15  -1    1.87    2.14
 -20 -15   1    2.67    1.48
 -20 -15   1    1.16    1.79
 -20 -15   1    4.70    1.52
  19  15  -1   -1.35    1.62
  19  15  -1    1.57    1.38
  19  15  -1    2.09    1.76
 -19 -15   1    0.05    1.48
 -19 -15   1   -1.01    1.27
 -19 -15   1    2.15    1.42
 -19 -15   1    1.39    1.52
  18  15  -1    0.13    1.34
  18  15  -1    0.64    1.42
  18  15  -1    1.52    1.24
 -18 -15   1    2.21    1.15
 -18 -15   1    0.84    1.17
 -18 -15   1    1.03    1.38
 -18 -15   1    2.59    1.33
  17  15  -1    0.84    1.31
  17  15  -1    0.71    1.12
  17  15  -1   -1.09    1.25
 -17 -15   1    3.34    1.10
 -17 -15   1    0.86    0.97
 -17 -15   1    2.87    1.31
 -17 -15   1    0.53    1.20
  16  15  -1    1.15    1.14
  16  15  -1    1.58    1.02
 -16 -15   1    0.71    1.06
 -16 -15   1    2.35    1.04
 -16 -15   1    4.13    1.27
 -16 -15   1    0.98    0.90
  15  15  -1   18.11    2.03
  15  15  -1   13.91    1.70
 -15 -15   1   15.60    1.61
 -15 -15   1   13.07    1.60
 -15 -15   1    9.61    1.41
 -15 -15   1   16.48    1.78
  14  15  -1   10.80    1.33
  14  15  -1   12.91    1.62
 -14 -15   1   15.06    1.67
 -14 -15   1   13.67    1.39
 -14 -15   1    9.99    1.30
 -14 -15   1   11.08    1.49
  13  15  -1    2.42    1.02
  13  15  -1    1.26    0.87
 -13 -15   1    1.55    0.86
 -13 -15   1    0.25    0.73
 -13 -15   1    1.56    0.88
 -13 -15   1    0.77    0.77
  12  15  -1    1.02    0.72
  12  15  -1   -0.41    0.76
 -12 -15   1    1.71    0.67
 -12 -15   1    1.16    0.71
 -12 -15   1    1.25    0.75
 -12 -15   1    1.51    0.79
  11  15  -1    5.03    0.95
  11  15  -1    5.40    0.96
 -11 -15   1    4.64    0.94
 -11 -15   1    5.10    0.81
 -11 -15   1    5.72    0.96
 -11 -15   1    5.66    0.93
  10  15  -1    2.87    0.78
  10  15  -1    1.72    0.77
 -10 -15   1    1.66    0.69
 -10 -15   1    1.93    0.74
 -10 -15   1    0.81    0.61
 -10 -15   1    2.22    0.72
   9  15  -1   29.70    1.75
   9  15  -1   32.99    1.93
  -9 -15   1   33.39    1.84
  -9 -15   1   30.70    1.78
  -9 -15   1   29.05    1.84
  -9 -15   1   29.81    1.69
   8  15  -1   26.31    1.79
   8  15  -1   25.41    1.58
  -8 -15   1   25.04    1.64
  -8 -15   1   26.37    1.58
  -8 -15   1   25.32    1.51
  -8 -15   1   25.88    1.72
   7  15  -1    3.55    0.83
   7  15  -1    3.11    0.76
  -7 -15   1    3.07    0.78
  -7 -15   1    3.92    0.78
  -7 -15   1    3.75    0.82
  -7 -15   1    2.67    0.69
  -7 -15   1    2.17    0.65
   6  15  -1    4.03    0.79
   6  15  -1    5.49    0.87
  -6 -15   1    5.02    0.79
  -6 -15   1    3.95    0.78
  -6 -15   1    6.32    0.92
  -6 -15   1    5.97    0.86
   5  15  -1    2.37    0.63
   5  15  -1    1.41    0.66
  -5 -15   1    2.24    0.67
  -5 -15   1    1.02    0.59
  -5 -15   1    1.08    0.62
   4  15  -1    5.75    0.92
   4  15  -1    5.05    0.82
  -4 -15   1    5.31    0.92
  -4 -15   1    4.60    0.83
  -4 -15   1    5.70    0.98
   3  15  -1    6.67    0.90
   3  15  -1    4.67    0.82
  -3 -15   1    6.80    0.94
  -3 -15   1    5.22    0.80
  -3 -15   1    4.25    0.79
   2  15  -1    1.24    0.68
   2  15  -1    1.97    0.66
  -2 -15   1    1.04    0.66
  -2 -15   1    2.10    0.74
  -2 -15   1    0.77    0.65
   1  15  -1   33.67    1.92
   1  15  -1   34.86    1.93
  -1 -15   1   33.97    1.96
  -1 -15   1   37.06    2.03
  -1 -15   1   33.73    2.03
   0  15  -1   75.38    3.13
   0 -15   1   64.13    3.20
   0 -15   1   72.63    3.22
   0 -15   1   71.83    3.09
  -1  15  -1   17.28    1.58
   1 -15   1   19.87    1.62
   1 -15   1   16.51    1.54
   1 -15   1   18.65    1.55
  -2  15  -1    4.02    1.02
   2 -15   1    6.40    1.06
   2 -15   1    4.88    0.95
   2 -15   1    4.16    1.01
  -3  15  -1    2.93    0.99
   3 -15   1    1.19    0.78
   3 -15   1   -0.12    0.78
   3 -15   1    1.71    0.78
  -4  15  -1    1.09    0.99
   4 -15   1    0.89    0.75
   4 -15   1   -0.21    0.80
   4 -15   1    1.58    0.98
  -5  15  -1    2.20    0.91
  -5  15  -1    3.04    1.05
   5 -15   1    1.07    0.90
   5 -15   1    2.42    0.97
   5 -15   1    4.13    1.21
  -6  15  -1    7.01    1.41
  -6  15  -1    6.25    1.23
   6 -15   1    8.39    1.54
   6 -15   1    7.87    1.29
   6 -15   1    7.16    1.23
  -7  15  -1    2.54    1.15
  -7  15  -1    2.97    1.39
  -7  15  -1    2.11    1.23
   7 -15   1    3.47    1.21
   7 -15   1    2.89    1.45
   7 -15   1    3.28    1.37
   7 -15   1    2.75    1.22
  -8  15  -1    2.57    1.54
  -8  15  -1    2.83    1.14
  -8  15  -1    4.56    1.32
   8 -15   1    4.50    1.55
   8 -15   1    3.39    1.60
   8 -15   1    1.92    1.24
   8 -15   1    2.55    1.29
  -9  15  -1    3.35    1.72
  -9  15  -1    4.20    1.35
   9 -15   1    4.64    1.40
   9 -15   1    6.31    1.90
   9 -15   1    4.48    1.45
 -10  15  -1   -0.32    1.41
 -10  15  -1    1.18    1.84
  10 -15   1    0.09    1.44
  10 -15   1    0.79    1.39
  10 -15   1    1.84    1.96
  21  14  -1   -0.03    1.95
 -21 -14   1    0.25    2.04
 -21 -14   1    0.72    1.55
 -21 -14   1   -0.41    1.71
  20  14  -1    0.52    1.81
  20  14  -1    1.90    1.91
 -20 -14   1    1.60    1.28
 -20 -14   1   -0.77    1.39
 -20 -14   1    2.37    1.74
  19  14  -1    2.02    1.26
  19  14  -1    1.99    1.37
  19  14  -1    1.81    1.71
  19  14  -1    3.38    1.60
 -19 -14   1    2.00    1.39
 -19 -14   1   -0.77    1.24
 -19 -14   1    2.35    1.28
 -19 -14   1    1.96    1.52
  18  14  -1    0.87    1.09
  18  14  -1   -0.12    1.45
  18  14  -1   -1.40    1.35
  18  14  -1    0.85    1.23
 -18 -14   1    1.18    1.28
 -18 -14   1   -1.45    1.17
 -18 -14   1    0.84    1.37
 -18 -14   1   -0.03    1.07
  17  14  -1    1.53    1.02
  17  14  -1    0.27    1.19
 -17 -14   1    0.51    1.18
 -17 -14   1    0.53    0.93
 -17 -14   1    2.54    1.28
 -17 -14   1    2.59    1.08
  16  14  -1    0.05    0.99
  16  14  -1   -0.39    0.92
 -16 -14   1    1.00    1.01
 -16 -14   1    1.50    1.07
 -16 -14   1    0.51    0.82
 -16 -14   1   -0.01    0.85
  15  14  -1    9.20    1.26
  15  14  -1   10.60    1.47
  15  14  -1   10.17    1.34
 -15 -14   1   15.90    1.72
 -15 -14   1    8.39    1.19
 -15 -14   1   10.61    1.36
 -15 -14   1    8.70    1.25
  14  14  -1   22.80    1.90
  14  14  -1   17.74    1.57
  14  14  -1   18.26    1.63
 -14 -14   1   18.23    1.51
 -14 -14   1   16.28    1.57
 -14 -14   1   13.91    1.46
 -14 -14   1   15.82    1.54
  13  14  -1    9.99    1.21
  13  14  -1   13.14    1.49
  13  14  -1   10.38    1.29
 -13 -14   1   12.62    1.44
 -13 -14   1   10.97    1.17
 -13 -14   1   13.22    1.39
 -13 -14   1   12.22    1.36
  12  14  -1   25.53    1.83
  12  14  -1   26.32    1.73
 -12 -14   1   21.91    1.64
 -12 -14   1   26.45    1.70
 -12 -14   1   25.62    1.76
 -12 -14   1   25.19    1.63
  11  14  -1   14.63    1.37
  11  14  -1   12.44    1.30
 -11 -14   1   12.24    1.23
 -11 -14   1   13.38    1.36
 -11 -14   1   13.36    1.38
 -11 -14   1   14.85    1.24
  10  14  -1    9.09    1.01
  10  14  -1    7.39    1.04
 -10 -14   1    9.00    1.03
 -10 -14   1    8.78    1.15
 -10 -14   1    7.32    0.99
 -10 -14   1    7.98    0.98
   9  14  -1   42.13    1.99
   9  14  -1   42.60    2.11
  -9 -14   1   37.96    1.99
  -9 -14   1   37.22    1.95
  -9 -14   1   36.59    1.89
  -9 -14   1   36.54    2.09
   8  14  -1   67.85    2.89
   8  14  -1   71.22    3.06
  -8 -14   1   67.34    2.87
  -8 -14   1   67.11    2.86
  -8 -14   1   72.04    2.96
  -8 -14   1   69.69    3.07
   7  14  -1   25.73    1.48
   7  14  -1   24.46    1.59
  -7 -14   1   19.74    1.54
  -7 -14   1   24.78    1.49
  -7 -14   1   23.93    1.47
  -7 -14   1   25.11    1.58
  -7 -14   1   23.29    1.51
   6  14  -1    6.63    0.86
   6  14  -1    5.52    0.81
  -6 -14   1    4.17    0.75
  -6 -14   1    5.48    0.85
  -6 -14   1    5.72    0.79
  -6 -14   1    5.70    0.81
  -6 -14   1    6.93    0.94
   5  14  -1    9.36    1.01
   5  14  -1    8.42    1.06
  -5 -14   1   11.06    1.05
  -5 -14   1   10.40    1.07
  -5 -14   1    8.10    1.05
   4  14  -1    7.10    1.02
   4  14  -1    6.80    0.84
  -4 -14   1    6.88    0.87
  -4 -14   1    7.76    0.93
  -4 -14   1    5.55    0.80
   3  14  -1   24.89    1.50
   3  14  -1   22.80    1.49
  -3 -14   1   24.18    1.56
  -3 -14   1   23.99    1.53
  -3 -14   1   23.67    1.47
   2  14  -1   18.93    1.32
   2  14  -1   20.14    1.39
  -2 -14   1   17.33    1.35
  -2 -14   1   17.69    1.37
  -2 -14   1   19.14    1.30
   1  14  -1   24.64    1.54
   1  14  -1   21.73    1.52
  -1 -14   1   24.25    1.57
  -1 -14   1   26.19    1.64
  -1 -14   1   23.40    1.55
   0  14  -1   79.37    3.27
   0 -14   1   79.27    3.44
   0 -14   1   74.60    3.20
   0 -14   1   79.00    3.37
  -1  14  -1   36.11    2.00
   1 -14   1   35.40    2.02
   1 -14   1   34.64    1.93
   1 -14   1   38.31    2.04
  -2  14  -1    3.24    0.73
  -2  14  -1    4.30    0.96
   2 -14   1    2.65    0.76
   2 -14   1    4.03    0.86
   2 -14   1    2.13    0.79
  -3  14  -1    4.08    0.81
  -3  14  -1    2.55    0.90
   3 -14   1    2.15    0.82
   3 -14   1    3.38    0.79
   3 -14   1    1.46    0.75
  -4  14  -1    3.91    0.88
  -4  14  -1    2.68    0.96
   4 -14   1    2.56    0.95
   4 -14   1    3.69    0.85
   4 -14   1    3.17    0.88
  -5  14  -1   10.02    1.35
  -5  14  -1    8.38    1.28
   5 -14   1    7.99    1.15
   5 -14   1    8.38    1.26
   5 -14   1    7.65    1.10
  -6  14  -1   11.24    1.29
  -6  14  -1   11.59    1.44
   6 -14   1   13.44    1.62
   6 -14   1   11.46    1.51
   6 -14   1   12.63    1.57
  -7  14  -1    3.76    1.21
  -7  14  -1    4.40    1.09
   7 -14   1    6.75    1.48
   7 -14   1    4.31    1.08
   7 -14   1    5.31    1.15
  -8  14  -1   10.30    1.43
  -8  14  -1   11.18    1.53
  -8  14  -1   10.30    1.61
   8 -14   1    9.48    1.81
   8 -14   1    9.26    1.64
   8 -14   1    9.68    1.36
   8 -14   1    9.41    1.49
  -9  14  -1   10.56    1.50
  -9  14  -1   14.27    1.98
  -9  14  -1   10.74    1.79
   9 -14   1   14.55    1.95
   9 -14   1   11.77    1.49
   9 -14   1   12.37    2.01
   9 -14   1   11.29    1.71
 -10  14  -1    1.65    1.73
 -10  14  -1    1.59    1.21
  10 -14   1    3.19    1.32
  10 -14   1    3.86    1.80
  10 -14   1    2.31    1.41
 -11  14  -1    1.22    1.40
 -11  14  -1   -0.40    1.90
  11 -14   1   -0.04    1.51
  11 -14   1   -1.41    1.96
  11 -14   1    1.63    1.41
  21  13  -1   -0.53    1.84
 -21 -13   1    4.01    1.51
 -21 -13   1   -1.52    1.39
 -21 -13   1    0.93    1.95
 -21 -13   1   -0.74    1.56
  20  13  -1   -0.02    1.67
  20  13  -1   -1.28    1.85
  20  13  -1    0.94    1.44
 -20 -13   1    1.91    1.73
 -20 -13   1    1.15    1.43
 -20 -13   1   -1.60    1.46
  19  13  -1    0.90    1.39
  19  13  -1    1.34    1.71
  19  13  -1   -0.97    1.38
  19  13  -1   -0.11    1.48
 -19 -13   1    0.13    1.27
 -19 -13   1    1.84    1.28
 -19 -13   1    1.72    1.60
  18  13  -1   -0.18    1.28
  18  13  -1    0.18    1.45
  18  13  -1   -0.71    1.17
 -18 -13   1    0.92    1.22
 -18 -13   1    2.94    1.43
 -18 -13   1   -0.17    1.09
 -18 -13   1    1.39    1.16
  17  13  -1    2.59    1.25
  17  13  -1    2.27    1.05
 -17 -13   1    3.25    1.10
 -17 -13   1    1.17    1.10
 -17 -13   1    2.62    1.05
 -17 -13   1    4.68    1.20
  16  13  -1    3.85    1.07
  16  13  -1    2.20    1.10
  16  13  -1    2.48    0.92
 -16 -13   1    2.59    0.94
 -16 -13   1    1.93    0.99
 -16 -13   1    1.87    0.98
 -16 -13   1    1.52    0.92
  15  13  -1    0.92    0.97
  15  13  -1    1.24    0.88
  15  13  -1    2.42    1.00
 -15 -13   1    1.73    0.94
 -15 -13   1    1.56    1.01
 -15 -13   1    1.17    0.81
 -15 -13   1    0.87    0.76
  14  13  -1    6.95    1.11
  14  13  -1    4.52    1.11
  14  13  -1    8.71    1.15
 -14 -13   1    9.29    1.15
 -14 -13   1    6.68    0.98
 -14 -13   1    7.74    1.13
 -14 -13   1    8.65    1.17
  13  13  -1   11.84    1.33
  13  13  -1   13.09    1.56
  13  13  -1   13.31    1.30
  13  13  -1   13.29    1.39
 -13 -13   1   13.16    1.32
 -13 -13   1    9.58    1.20
 -13 -13   1   13.90    1.48
 -13 -13   1   14.02    1.38
  12  13  -1   23.56    1.60
  12  13  -1   27.81    1.79
  12  13  -1   23.15    1.53
 -12 -13   1   20.78    1.62
 -12 -13   1   21.21    1.57
 -12 -13   1   20.96    1.55
 -12 -13   1   21.84    1.64
  11  13  -1   25.02    1.63
  11  13  -1   25.54    1.56
  11  13  -1   25.31    1.73
 -11 -13   1   23.82    1.70
 -11 -13   1   28.17    1.63
 -11 -13   1   23.29    1.51
 -11 -13   1   25.73    1.69
  10  13  -1   16.08    1.38
  10  13  -1   15.60    1.23
 -10 -13   1   16.04    1.34
 -10 -13   1   14.32    1.28
 -10 -13   1   15.12    1.30
 -10 -13   1   14.38    1.18
   9  13  -1   30.67    1.62
   9  13  -1   24.80    1.69
  -9 -13   1   31.05    1.66
  -9 -13   1   28.99    1.61
  -9 -13   1   28.46    1.65
  -9 -13   1   31.35    1.81
   8  13  -1   64.55    2.82
   8  13  -1   64.12    2.70
  -8 -13   1   66.94    2.89
  -8 -13   1   63.77    2.73
  -8 -13   1   62.68    2.68
  -8 -13   1   63.68    2.68
   7  13  -1   72.14    2.89
   7  13  -1   73.71    3.07
  -7 -13   1   70.77    2.88
  -7 -13   1   67.61    2.86
  -7 -13   1   75.50    3.09
  -7 -13   1   72.30    2.98
   6  13  -1   41.71    2.06
   6  13  -1   43.21    1.98
  -6 -13   1   42.22    2.06
  -6 -13   1   42.08    2.00
  -6 -13   1   40.21    1.93
  -6 -13   1   43.13    2.14
  -6 -13   1   42.85    1.94
   5  13  -1   15.62    1.14
   5  13  -1   12.86    1.11
  -5 -13   1   12.62    1.08
  -5 -13   1   11.80    0.97
  -5 -13   1   11.67    1.01
  -5 -13   1   14.52    1.16
   4  13  -1    3.45    0.66
   4  13  -1    3.24    0.66
  -4 -13   1    3.21    0.64
  -4 -13   1    2.82    0.63
  -4 -13   1    3.13    0.59
   3  13  -1   28.94    1.54
   3  13  -1   28.82    1.61
  -3 -13   1   29.25    1.63
  -3 -13   1   30.60    1.53
  -3 -13   1   30.50    1.67
   2  13  -1   55.64    2.32
   2  13  -1   50.02    2.36
  -2 -13   1   52.24    2.25
  -2 -13   1   52.84    2.46
  -2 -13   1   49.81    2.41
   1  13  -1    7.74    1.01
   1  13  -1    8.80    1.05
  -1 -13   1    8.06    0.98
  -1 -13   1    9.28    1.03
  -1 -13   1    8.49    1.03
   0  13  -1   91.96    3.73
   0 -13   1   99.20    3.99
   0 -13   1   94.80    3.73
   0 -13   1   94.60    3.88
  -1  13  -1   34.08    1.82
   1 -13   1   31.66    1.86
   1 -13   1   33.89    1.83
   1 -13   1   33.36    1.80
  -2  13  -1    7.84    1.07
  -2  13  -1    7.27    0.90
  -2  13  -1    8.08    1.09
   2 -13   1    9.13    1.07
   2 -13   1    8.73    1.07
   2 -13   1    8.60    1.10
  -3  13  -1    8.76    1.19
  -3  13  -1    7.62    1.05
  -3  13  -1    6.93    0.94
   3 -13   1    8.03    1.06
   3 -13   1    8.18    1.10
   3 -13   1    9.54    1.12
  -4  13  -1   14.53    1.36
  -4  13  -1   17.73    1.63
  -4  13  -1   16.11    1.37
   4 -13   1   16.61    1.48
   4 -13   1   16.85    1.40
   4 -13   1   17.24    1.41
   4 -13   1   17.23    1.55
  -5  13  -1   14.99    1.44
  -5  13  -1   18.47    1.60
   5 -13   1   14.86    1.54
   5 -13   1   16.14    1.47
   5 -13   1   15.78    1.46
  -6  13  -1    6.12    1.18
  -6  13  -1    7.17    1.07
   6 -13   1    7.29    1.19
   6 -13   1    6.42    1.03
   6 -13   1    7.23    1.20
  -7  13  -1    3.42    0.91
  -7  13  -1    3.08    1.10
   7 -13   1    2.54    1.10
   7 -13   1    3.47    0.94
   7 -13   1    1.92    0.93
  -8  13  -1    4.43    1.29
  -8  13  -1    5.64    1.15
  -8  13  -1    5.37    1.11
   8 -13   1    5.58    1.11
   8 -13   1    4.76    1.29
   8 -13   1    6.26    1.26
  -9  13  -1   14.80    1.87
  -9  13  -1   14.47    1.81
  -9  13  -1   10.88    1.34
   9 -13   1   10.57    1.73
   9 -13   1   15.91    1.89
   9 -13   1   10.74    1.54
   9 -13   1   11.26    1.59
 -10  13  -1    3.66    1.16
 -10  13  -1    3.85    1.24
 -10  13  -1    3.39    1.60
  10 -13   1    2.66    1.64
  10 -13   1    4.59    1.41
  10 -13   1    3.38    1.20
  10 -13   1    0.93    1.54
 -11  13  -1    2.51    1.60
 -11  13  -1   -0.09    1.13
  11 -13   1    2.24    1.24
  11 -13   1   -1.23    1.63
  11 -13   1   -1.82    1.34
 -12  13  -1    1.11    1.84
 -12  13  -1    0.59    1.37
  12 -13   1    0.30    1.57
  12 -13   1    0.13    1.96
  12 -13   1    0.77    1.34
  21  12  -1   -0.20    2.04
  21  12  -1    0.45    1.88
 -21 -12   1    0.87    1.94
 -21 -12   1   -1.65    1.44
 -21 -12   1    1.34    1.42
 -21 -12   1   -0.87    1.50
  20  12  -1   -0.03    1.74
  20  12  -1   -0.20    1.63
  20  12  -1    0.03    1.47
 -20 -12   1    1.22    1.54
 -20 -12   1    2.30    1.74
 -20 -12   1    2.44    1.34
 -20 -12   1    1.85    1.28
  19  12  -1    1.27    1.49
  19  12  -1    0.17    1.22
  19  12  -1    0.31    1.36
  19  12  -1    2.44    1.72
 -19 -12   1   -0.36    1.43
 -19 -12   1    1.02    1.32
 -19 -12   1    0.73    1.22
  18  12  -1    1.44    1.12
  18  12  -1   -0.96    1.23
  18  12  -1    1.07    1.17
 -18 -12   1    1.99    1.19
 -18 -12   1    1.28    1.11
 -18 -12   1   -0.10    1.31
  17  12  -1    1.58    1.13
  17  12  -1    1.46    0.99
 -17 -12   1    1.45    1.11
 -17 -12   1    0.82    1.17
 -17 -12   1    1.92    1.03
 -17 -12   1    0.89    0.97
  16  12  -1    3.27    1.05
  16  12  -1    4.97    1.23
  16  12  -1    3.91    1.10
 -16 -12   1    4.96    1.15
 -16 -12   1    3.36    1.01
 -16 -12   1    4.71    1.04
 -16 -12   1    3.71    1.03
  15  12  -1    4.14    1.02
  15  12  -1    4.90    1.04
  15  12  -1    4.29    0.97
 -15 -12   1    4.66    0.90
 -15 -12   1    6.19    1.10
 -15 -12   1    5.26    1.05
 -15 -12   1    5.98    1.16
  14  12  -1   13.54    1.59
  14  12  -1   13.17    1.42
  14  12  -1   16.30    1.43
 -14 -12   1   14.44    1.43
 -14 -12   1   15.16    1.47
 -14 -12   1   13.04    1.38
 -14 -12   1   15.02    1.53
  13  12  -1    7.38    0.99
  13  12  -1   10.62    1.32
  13  12  -1    7.64    1.06
  13  12  -1    9.34    1.18
 -13 -12   1   10.91    1.32
 -13 -12   1    7.60    1.07
 -13 -12   1    7.74    1.02
 -13 -12   1    6.71    1.05
  12  12  -1   20.91    1.49
  12  12  -1   17.17    1.45
  12  12  -1   20.07    1.58
  12  12  -1   21.27    1.52
 -12 -12   1   20.76    1.56
 -12 -12   1   19.70    1.43
 -12 -12   1   21.17    1.51
 -12 -12   1   25.08    1.60
  11  12  -1   32.50    1.87
  11  12  -1   34.59    1.87
  11  12  -1   34.96    1.84
  11  12  -1   36.92    1.96
 -11 -12   1   31.87    1.75
 -11 -12   1   35.08    1.86
 -11 -12   1   34.73    1.95
 -11 -12   1   34.62    1.85
  10  12  -1   17.03    1.25
  10  12  -1   11.92    1.13
  10  12  -1   15.86    1.35
 -10 -12   1   16.35    1.25
 -10 -12   1   17.51    1.24
 -10 -12   1   16.36    1.24
 -10 -12   1   16.34    1.32
   9  12  -1    9.34    0.95
   9  12  -1    8.82    1.08
  -9 -12   1    8.15    0.95
  -9 -12   1   10.43    1.00
  -9 -12   1    9.91    0.98
  -9 -12   1   10.15    1.09
   8  12  -1   37.79    1.81
   8  12  -1   38.90    1.97
  -8 -12   1   41.07    1.89
  -8 -12   1   37.57    1.79
  -8 -12   1   35.75    1.78
  -8 -12   1   40.08    1.96
   7  12  -1   61.45    2.50
   7  12  -1   61.45    2.66
  -7 -12   1   60.33    2.54
  -7 -12   1   60.55    2.49
  -7 -12   1   60.45    2.63
  -7 -12   1   60.74    2.48
   6  12  -1   72.55    3.08
   6  12  -1   75.17    2.95
  -6 -12   1   77.75    3.13
  -6 -12   1   73.53    2.91
  -6 -12   1   77.35    3.02
  -6 -12   1   76.13    2.95
   5  12  -1   22.77    1.39
   5  12  -1   22.13    1.27
  -5 -12   1   21.73    1.24
  -5 -12   1   23.81    1.26
  -5 -12   1   24.69    1.38
  -5 -12   1   23.54    1.42
   4  12  -1    6.69    0.89
   4  12  -1    7.61    0.81
  -4 -12   1    7.27    0.89
  -4 -12   1    7.89    0.83
  -4 -12   1    7.25    0.84
   3  12  -1    9.11    0.87
   3  12  -1    8.36    0.90
  -3 -12   1    7.83    0.92
  -3 -12   1    8.58    0.92
  -3 -12   1    8.92    0.82
   2  12  -1   22.77    1.32
   2  12  -1   22.78    1.40
  -2 -12   1   24.94    1.31
  -2 -12   1   25.38    1.44
  -2 -12   1   20.98    1.39
   1  12  -1    8.36    0.97
   1  12  -1    9.67    0.98
  -1 -12   1    9.38    0.98
  -1 -12   1    8.04    0.98
  -1 -12   1   11.46    1.01
   0  12  -1  119.41    4.60
   0  12  -1  118.20    4.46
   0 -12   1  113.07    4.42
   0 -12   1  122.04    4.64
   0 -12   1  128.21    4.81
  -1  12  -1   77.44    3.18
   1 -12   1   81.61    3.30
   1 -12   1   76.69    3.15
   1 -12   1   80.06    3.37
  -2  12  -1   25.39    1.59
  -2  12  -1   24.55    1.54
   2 -12   1   25.22    1.51
   2 -12   1   23.68    1.52
   2 -12   1   25.63    1.56
  -3  12  -1   28.49    1.70
  -3  12  -1   34.70    1.84
  -3  12  -1   33.45    1.80
   3 -12   1   33.91    1.84
   3 -12   1   32.75    1.79
   3 -12   1   30.96    1.80
  -4  12  -1   19.68    1.40
  -4  12  -1   21.45    1.54
  -4  12  -1   18.80    1.42
   4 -12   1   17.82    1.40
   4 -12   1   20.72    1.49
   4 -12   1   19.01    1.55
   4 -12   1   18.78    1.39
  -5  12  -1   11.56    1.24
  -5  12  -1   12.06    1.25
  -5  12  -1   12.18    1.45
   5 -12   1   12.14    1.38
   5 -12   1    9.83    1.21
   5 -12   1   11.64    1.26
   5 -12   1   11.55    1.43
  -6  12  -1    2.60    0.72
  -6  12  -1    1.29    0.73
  -6  12  -1    1.39    0.89
   6 -12   1    2.32    0.91
   6 -12   1    0.81    0.76
   6 -12   1    1.96    0.69
  -7  12  -1    2.80    0.84
  -7  12  -1    2.32    1.09
   7 -12   1    0.53    0.79
   7 -12   1    1.01    0.94
   7 -12   1    2.09    0.77
  -8  12  -1    3.09    1.17
  -8  12  -1    1.74    0.81
  -8  12  -1    3.55    0.91
   8 -12   1    1.94    1.04
   8 -12   1    3.65    1.03
   8 -12   1    2.71    0.91
  -9  12  -1    7.87    1.18
  -9  12  -1    7.53    1.44
  -9  12  -1    5.99    1.14
   9 -12   1    8.43    1.30
   9 -12   1    6.50    1.41
   9 -12   1    7.16    1.15
 -10  12  -1    3.14    1.18
 -10  12  -1    4.13    1.10
 -10  12  -1    1.14    1.34
  10 -12   1    4.16    1.09
  10 -12   1    3.95    1.58
  10 -12   1    5.11    1.53
  10 -12   1    3.34    1.27
 -11  12  -1    1.76    1.55
 -11  12  -1   -0.26    1.15
 -11  12  -1    1.26    1.13
  11 -12   1    0.86    1.59
  11 -12   1    2.51    1.33
  11 -12   1    1.19    1.52
  11 -12   1    0.81    1.10
 -12  12  -1    1.49    1.76
 -12  12  -1   -0.59    1.20
  12 -12   1    1.09    1.38
  12 -12   1   -0.35    1.17
  12 -12   1    1.15    1.71
 -13  12  -1    1.99    1.94
 -13  12  -1   -2.52    1.34
  13 -12   1   -2.96    1.95
  13 -12   1   -0.61    1.30
  13 -12   1   -0.41    1.66
  21  11  -1    4.38    2.04
  21  11  -1    1.99    1.94
 -21 -11   1    1.25    1.36
 -21 -11   1    1.32    1.92
 -21 -11   1    3.10    1.57
 -21 -11   1    1.76    1.66
  20  11  -1    1.51    1.61
  20  11  -1    3.80    1.89
  20  11  -1    0.96    1.43
 -20 -11   1   -1.24    1.29
 -20 -11   1    1.28    1.61
 -20 -11   1    1.47    1.41
 -20 -11   1    1.69    1.21
  19  11  -1    4.98    1.69
  19  11  -1    3.15    1.31
  19  11  -1    1.43    1.37
  19  11  -1   -0.69    1.22
 -19 -11   1    3.36    1.35
 -19 -11   1    1.00    1.15
 -19 -11   1    2.94    1.58
 -19 -11   1    3.40    1.17
  18  11  -1    5.64    1.33
  18  11  -1    7.24    1.40
  18  11  -1    2.85    1.32
 -18 -11   1    7.23    1.35
 -18 -11   1    3.98    1.25
 -18 -11   1    5.16    1.40
  17  11  -1    0.70    1.02
  17  11  -1    1.32    1.22
  17  11  -1    2.66    1.10
 -17 -11   1    0.98    0.97
 -17 -11   1    1.07    0.93
 -17 -11   1    0.57    0.99
  16  11  -1    1.61    1.06
  16  11  -1    1.70    1.02
  16  11  -1    0.20    0.86
 -16 -11   1   -0.62    0.81
 -16 -11   1    0.80    0.91
 -16 -11   1    0.26    0.90
 -16 -11   1    1.18    0.97
  15  11  -1   -1.06    0.85
  15  11  -1   -0.48    0.80
  15  11  -1    0.02    0.72
 -15 -11   1   -0.21    0.70
 -15 -11   1    0.97    0.83
 -15 -11   1   -0.81    0.79
 -15 -11   1   -0.55    0.71
  14  11  -1   14.80    1.51
  14  11  -1   11.86    1.52
  14  11  -1   13.32    1.39
  14  11  -1   15.07    1.40
 -14 -11   1   11.26    1.43
 -14 -11   1   14.94    1.40
 -14 -11   1   16.24    1.49
 -14 -11   1   11.41    1.32
  13  11  -1   10.45    1.22
  13  11  -1    8.72    1.10
  13  11  -1   11.49    1.39
  13  11  -1    9.20    1.13
 -13 -11   1    8.34    1.04
 -13 -11   1   11.80    1.31
 -13 -11   1    9.97    1.28
 -13 -11   1    8.64    1.08
  12  11  -1   44.68    2.33
  12  11  -1   43.63    2.18
  12  11  -1   43.14    2.17
  12  11  -1   45.96    2.23
 -12 -11   1   41.90    2.14
 -12 -11   1   44.14    2.18
 -12 -11   1   46.07    2.21
 -12 -11   1   45.14    2.32
  11  11  -1   41.14    2.07
  11  11  -1   36.33    1.92
  11  11  -1   38.72    1.96
  11  11  -1   39.86    1.95
 -11 -11   1   37.64    1.94
 -11 -11   1   39.36    2.07
 -11 -11   1   38.86    1.97
 -11 -11   1   36.85    1.90
  10  11  -1    0.68    0.56
  10  11  -1    0.92    0.52
  10  11  -1    1.23    0.49
  10  11  -1    0.93    0.53
 -10 -11   1    1.09    0.53
 -10 -11   1    0.77    0.51
 -10 -11   1    0.86    0.55
 -10 -11   1    1.13    0.51
   9  11  -1   14.66    1.13
   9  11  -1   15.10    1.08
   9  11  -1   12.87    1.01
  -9 -11   1   13.95    1.06
  -9 -11   1   12.88    1.10
  -9 -11   1   13.02    0.98
  -9 -11   1   12.46    1.05
   8  11  -1    9.70    0.98
   8  11  -1   11.08    0.91
  -8 -11   1    9.66    0.93
  -8 -11   1   10.53    0.88
  -8 -11   1   10.90    0.87
  -8 -11   1    9.24    0.87
   7  11  -1    1.66    0.51
   7  11  -1    1.21    0.45
  -7 -11   1    1.33    0.44
  -7 -11   1    1.78    0.58
  -7 -11   1    1.77    0.47
  -7 -11   1    1.98    0.45
   6  11  -1   14.16    0.93
   6  11  -1   15.26    1.10
  -6 -11   1   14.72    0.97
  -6 -11   1   14.12    0.93
  -6 -11   1   14.58    1.07
  -6 -11   1   15.65    0.98
   5  11  -1   28.48    1.55
   5  11  -1   30.31    1.43
  -5 -11   1   28.48    1.52
  -5 -11   1   30.49    1.42
  -5 -11   1   29.25    1.41
   4  11  -1   48.02    1.94
   4  11  -1   46.10    2.05
  -4 -11   1   42.81    2.04
  -4 -11   1   44.08    2.11
  -4 -11   1   45.71    1.93
   3  11  -1   71.84    2.73
   3  11  -1   69.45    2.84
  -3 -11   1   70.11    2.70
  -3 -11   1   68.62    2.85
  -3 -11   1   67.10    2.94
   2  11  -1   25.47    1.32
   2  11  -1   24.60    1.38
  -2 -11   1   24.30    1.41
  -2 -11   1   26.88    1.34
  -2 -11   1   24.58    1.41
   1  11  -1   34.64    1.57
   1  11  -1   30.74    1.61
  -1 -11   1   31.93    1.52
  -1 -11   1   30.16    1.60
  -1 -11   1   29.78    1.63
   0  11  -1  170.10    6.00
   0  11  -1  167.91    6.20
   0 -11   1  174.93    6.49
   0 -11   1  167.27    6.22
   0 -11   1  169.76    5.98
  -1  11  -1  111.07    4.20
  -1  11  -1  116.86    4.50
   1 -11   1  116.91    4.52
   1 -11   1  111.84    4.19
   1 -11   1  110.62    4.34
  -2  11  -1   26.62    1.49
  -2  11  -1   25.87    1.48
   2 -11   1   27.86    1.54
   2 -11   1   24.19    1.45
   2 -11   1   24.86    1.49
  -3  11  -1   31.17    1.66
  -3  11  -1   27.27    1.61
   3 -11   1   28.09    1.65
   3 -11   1   28.72    1.62
   3 -11   1   33.48    1.69
  -4  11  -1   13.81    1.22
  -4  11  -1   11.51    1.11
  -4  11  -1   11.37    1.12
   4 -11   1    9.45    1.23
   4 -11   1   10.26    1.10
   4 -11   1    9.50    1.04
   4 -11   1   12.97    1.19
  -5  11  -1    1.01    0.75
  -5  11  -1    0.27    0.57
  -5  11  -1    0.66    0.55
   5 -11   1   -0.04    0.53
   5 -11   1    0.08    0.63
   5 -11   1   -0.57    0.55
   5 -11   1    0.57    0.70
  -6  11  -1    3.22    0.80
  -6  11  -1    2.83    0.90
  -6  11  -1    3.00    0.76
   6 -11   1    3.68    0.79
   6 -11   1    3.05    0.79
   6 -11   1    2.99    0.85
   6 -11   1    3.07    0.89
  -7  11  -1    2.63    0.82
  -7  11  -1    3.68    1.01
  -7  11  -1    3.15    0.81
   7 -11   1    4.51    1.00
   7 -11   1    4.43    0.91
   7 -11   1    4.33    0.83
  -8  11  -1   -0.18    0.67
  -8  11  -1    0.82    0.89
  -8  11  -1   -0.12    0.71
   8 -11   1   -0.79    0.79
   8 -11   1   -0.51    0.69
   8 -11   1    0.96    0.83
  -9  11  -1    1.40    0.88
  -9  11  -1    1.30    1.12
  -9  11  -1    1.47    0.84
   9 -11   1    1.45    0.80
   9 -11   1    2.91    1.10
   9 -11   1    1.62    0.95
 -10  11  -1    7.94    1.23
 -10  11  -1    6.33    1.14
 -10  11  -1    5.82    1.40
  10 -11   1    7.47    1.30
  10 -11   1    6.86    1.12
  10 -11   1    6.59    1.42
 -11  11  -1    4.29    1.21
 -11  11  -1    2.96    1.15
 -11  11  -1    1.57    1.36
  11 -11   1    2.31    1.45
  11 -11   1    4.57    1.45
  11 -11   1    4.67    1.11
  11 -11   1    5.21    1.31
 -12  11  -1   -1.11    1.41
 -12  11  -1    0.29    1.11
 -12  11  -1    2.73    1.29
  12 -11   1   -0.91    1.26
  12 -11   1    1.92    1.60
  12 -11   1   -1.32    1.00
 -13  11  -1    0.59    1.31
 -13  11  -1   -3.94    1.63
  13 -11   1   -0.89    1.16
  13 -11   1   -1.02    1.82
  13 -11   1    1.80    1.43
 -14  11  -1   -5.10    1.78
 -14  11  -1    0.51    1.49
  14 -11   1    0.05    2.09
  14 -11   1    1.78    1.35
  14 -11   1    0.69    1.67
  21  10  -1   -0.12    2.03
  21  10  -1    4.52    1.80
 -21 -10   1   -0.56    1.94
 -21 -10   1    2.18    1.61
 -21 -10   1    0.93    1.42
 -21 -10   1   -0.04    1.36
  20  10  -1   -0.22    1.58
  20  10  -1   -0.86    1.74
  20  10  -1   -2.99    1.44
 -20 -10   1   -0.36    1.59
 -20 -10   1    3.54    1.35
 -20 -10   1    2.03    1.51
 -20 -10   1    1.54    1.18
  19  10  -1   -0.31    1.35
  19  10  -1   -0.45    1.26
  19  10  -1    1.08    1.48
  19  10  -1    0.72    1.66
 -19 -10   1    0.84    1.18
 -19 -10   1    1.05    1.06
 -19 -10   1    0.42    1.42
 -19 -10   1    0.36    1.18
  18  10  -1    3.61    1.22
  18  10  -1    1.17    1.23
  18  10  -1    3.95    1.33
 -18 -10   1    6.09    1.11
 -18 -10   1    6.00    1.30
 -18 -10   1    5.05    1.22
 -18 -10   1    3.17    1.39
  17  10  -1    5.84    1.30
  17  10  -1    6.11    1.36
  17  10  -1    5.04    1.17
 -17 -10   1    6.36    1.22
 -17 -10   1    4.31    1.11
 -17 -10   1    5.93    1.23
  16  10  -1    4.37    1.19
  16  10  -1    3.93    1.18
  16  10  -1    4.51    1.04
 -16 -10   1    2.18    0.95
 -16 -10   1    5.28    1.10
 -16 -10   1    4.23    1.02
  15  10  -1    7.04    1.14
  15  10  -1    6.30    1.00
  15  10  -1    6.15    1.13
  15  10  -1    4.51    0.97
 -15 -10   1    5.17    0.92
 -15 -10   1    5.59    1.07
 -15 -10   1    7.18    1.12
 -15 -10   1    4.98    1.04
  14  10  -1   18.10    1.56
  14  10  -1   13.23    1.41
  14  10  -1   12.87    1.46
  14  10  -1   16.14    1.47
 -14 -10   1   13.45    1.47
 -14 -10   1   16.11    1.37
 -14 -10   1   11.73    1.38
  13  10  -1    3.96    0.90
  13  10  -1    5.17    1.01
  13  10  -1    6.70    0.95
  13  10  -1    5.28    0.88
 -13 -10   1    4.74    0.91
 -13 -10   1    6.92    1.00
 -13 -10   1    5.14    0.93
 -13 -10   1    7.30    1.09
  12  10  -1   26.99    1.60
  12  10  -1   21.26    1.57
  12  10  -1   23.50    1.67
  12  10  -1   24.92    1.58
 -12 -10   1   30.02    1.74
 -12 -10   1   26.93    1.61
 -12 -10   1   28.30    1.65
 -12 -10   1   26.69    1.61
  11  10  -1   25.96    1.50
  11  10  -1   27.41    1.52
  11  10  -1   23.10    1.49
  11  10  -1   26.58    1.66
 -11 -10   1   24.65    1.50
 -11 -10   1   25.78    1.58
 -11 -10   1   26.92    1.56
 -11 -10   1   23.96    1.44
  10  10  -1    1.08    0.58
  10  10  -1    1.44    0.55
  10  10  -1    1.46    0.47
  10  10  -1    1.64    0.52
 -10 -10   1    1.83    0.55
 -10 -10   1    0.58    0.45
 -10 -10   1    2.10    0.58
 -10 -10   1    1.17    0.47
   9  10  -1    5.55    0.67
   9  10  -1    6.50    0.85
   9  10  -1    3.96    0.59
   9  10  -1    4.42    0.65
  -9 -10   1    4.89    0.65
  -9 -10   1    4.89    0.65
  -9 -10   1    4.69    0.65
  -9 -10   1    4.05    0.64
   8  10  -1   40.51    1.77
   8  10  -1   39.27    1.88
   8  10  -1   39.64    1.77
  -8 -10   1   39.50    1.77
  -8 -10   1   40.43    1.87
  -8 -10   1   39.58    1.78
  -8 -10   1   37.13    1.75
   7  10  -1   36.58    1.68
   7  10  -1   39.38    1.84
  -7 -10   1   38.35    1.70
  -7 -10   1   38.70    1.73
  -7 -10   1   35.84    1.70
  -7 -10   1   38.80    1.81
   6  10  -1   13.56    0.99
   6  10  -1   13.09    0.89
  -6 -10   1   12.75    0.88
  -6 -10   1   12.79    0.90
  -6 -10   1   12.83    0.89
  -6 -10   1   13.19    0.97
   5  10  -1   72.38    2.70
   5  10  -1   67.93    2.84
  -5 -10   1   73.12    2.71
  -5 -10   1   67.73    2.85
  -5 -10   1   71.06    2.75
  -5 -10   1   70.86    2.68
   4  10  -1  233.79    8.32
   4  10  -1  239.06    7.99
  -4 -10   1  236.29    8.34
  -4 -10   1  234.27    8.73
  -4 -10   1  234.78    7.98
   3  10  -1  181.51    6.49
   3  10  -1  183.58    6.23
  -3 -10   1  173.53    6.79
  -3 -10   1  187.01    6.52
  -3 -10   1  178.16    6.22
   2  10  -1   47.18    1.94
   2  10  -1   47.26    2.03
  -2 -10   1   45.49    1.92
  -2 -10   1   46.91    2.06
  -2 -10   1   45.46    2.11
   1  10  -1   64.30    2.52
   1  10  -1   61.89    2.59
  -1 -10   1   63.34    2.61
  -1 -10   1   64.93    2.49
  -1 -10   1   62.11    2.69
   0  10  -1   92.57    3.34
   0  10  -1   84.36    3.43
   0 -10   1   84.04    3.56
   0 -10   1   93.85    3.34
   0 -10   1   88.33    3.45
  -1  10  -1   67.14    2.84
  -1  10  -1   68.80    2.70
   1 -10   1   65.19    2.65
   1 -10   1   67.70    2.85
   1 -10   1   67.31    2.76
  -2  10  -1   17.83    1.16
  -2  10  -1   18.86    1.18
   2 -10   1   16.58    1.18
   2 -10   1   19.03    1.16
   2 -10   1   15.91    1.13
  -3  10  -1    9.62    0.96
  -3  10  -1   10.42    0.98
  -3  10  -1   10.35    0.93
   3 -10   1    8.90    0.90
   3 -10   1    9.78    0.92
   3 -10   1    9.82    0.95
  -4  10  -1    6.00    0.85
  -4  10  -1    5.11    0.78
  -4  10  -1    4.96    0.74
   4 -10   1    5.64    0.76
   4 -10   1    5.37    0.91
   4 -10   1    4.67    0.83
   4 -10   1    4.24    0.72
  -5  10  -1   32.47    1.80
  -5  10  -1   30.91    1.72
  -5  10  -1   33.32    1.77
   5 -10   1   32.74    1.79
   5 -10   1   30.40    1.74
   5 -10   1   33.73    1.76
   5 -10   1   31.73    1.90
  -6  10  -1   25.21    1.67
  -6  10  -1   21.98    1.53
  -6  10  -1   25.80    1.56
   6 -10   1   24.82    1.55
   6 -10   1   23.53    1.62
   6 -10   1   26.46    1.63
   6 -10   1   27.05    1.73
  -7  10  -1    7.57    0.95
  -7  10  -1    7.00    1.11
  -7  10  -1    7.09    1.00
   7 -10   1    6.11    0.97
   7 -10   1    8.51    1.11
   7 -10   1    9.28    1.14
   7 -10   1    8.70    1.12
  -8  10  -1    2.76    0.82
  -8  10  -1    2.04    0.73
  -8  10  -1    1.92    0.91
   8 -10   1    1.37    0.79
   8 -10   1    1.37    0.81
   8 -10   1    1.94    0.77
  -9  10  -1    2.26    0.79
  -9  10  -1    0.93    0.91
  -9  10  -1    1.30    0.79
   9 -10   1    1.69    0.98
   9 -10   1    0.88    0.86
   9 -10   1    1.09    0.71
 -10  10  -1    1.49    1.09
 -10  10  -1    2.06    0.91
 -10  10  -1    1.16    0.89
  10 -10   1    1.76    0.94
  10 -10   1    2.11    1.05
  10 -10   1    1.12    0.80
 -11  10  -1    3.81    1.05
 -11  10  -1    2.32    1.21
 -11  10  -1    1.43    1.03
  11 -10   1    0.71    1.16
  11 -10   1    3.74    1.02
  11 -10   1    3.38    1.18
 -12  10  -1    0.37    1.03
 -12  10  -1    1.54    1.40
 -12  10  -1    2.66    1.20
  12 -10   1    4.83    1.30
  12 -10   1    1.38    1.36
  12 -10   1    2.27    1.18
  12 -10   1    0.66    0.96
 -13  10  -1    1.33    1.53
 -13  10  -1   -0.88    1.39
 -13  10  -1    1.20    1.19
  13 -10   1   -1.22    1.60
  13 -10   1    1.31    1.10
  13 -10   1    1.71    1.34
 -14  10  -1    1.65    1.72
 -14  10  -1   -0.69    1.32
  14 -10   1    0.71    1.23
  14 -10   1   -3.43    1.83
  14 -10   1   -0.15    1.43
  21   9  -1    0.40    1.88
  21   9  -1   -0.51    1.89
 -21  -9   1    0.23    1.89
 -21  -9   1    1.39    1.54
 -21  -9   1    0.22    1.65
 -21  -9   1    0.59    1.51
  20   9  -1    2.08    1.76
  20   9  -1   -1.03    1.43
  20   9  -1    2.74    1.68
 -20  -9   1    1.71    1.30
 -20  -9   1    2.44    1.55
 -20  -9   1    2.17    1.37
 -20  -9   1   -1.18    1.55
  19   9  -1   -2.23    1.22
  19   9  -1   -0.77    1.36
  19   9  -1   -0.07    1.56
 -19  -9   1   -0.51    1.04
 -19  -9   1    0.93    1.21
 -19  -9   1    0.50    1.15
 -19  -9   1    2.01    1.38
  18   9  -1    2.67    1.22
  18   9  -1    0.79    1.09
  18   9  -1    3.16    1.33
 -18  -9   1    3.77    1.04
 -18  -9   1    2.89    1.23
 -18  -9   1    2.68    0.99
 -18  -9   1    3.91    1.28
  17   9  -1    3.43    1.19
  17   9  -1    2.00    1.10
  17   9  -1    2.73    1.07
  17   9  -1    3.33    1.27
 -17  -9   1    4.22    1.06
 -17  -9   1    3.73    0.99
 -17  -9   1    2.19    0.98
 -17  -9   1    2.29    1.05
  16   9  -1    4.24    1.07
  16   9  -1    2.46    1.02
  16   9  -1   -0.03    0.85
  16   9  -1    3.16    1.00
 -16  -9   1    3.56    1.02
 -16  -9   1    1.85    0.89
 -16  -9   1    3.46    0.99
  15   9  -1   20.13    1.68
  15   9  -1   19.77    1.63
  15   9  -1   18.07    1.67
  15   9  -1   22.01    1.81
 -15  -9   1   22.17    1.71
 -15  -9   1   16.42    1.68
 -15  -9   1   22.31    1.75
  14   9  -1   18.87    1.60
  14   9  -1   22.44    1.71
  14   9  -1   23.98    1.65
  14   9  -1   18.64    1.64
 -14  -9   1   24.73    1.66
 -14  -9   1   19.49    1.62
 -14  -9   1   19.46    1.61
 -14  -9   1   24.68    1.70
  13   9  -1    0.35    0.69
  13   9  -1    1.19    0.67
  13   9  -1    0.02    0.67
  13   9  -1    1.66    0.80
 -13  -9   1    2.68    0.72
 -13  -9   1    1.19    0.67
 -13  -9   1    0.40    0.68
 -13  -9   1    1.20    0.73
  12   9  -1    2.45    0.72
  12   9  -1    3.05    0.80
  12   9  -1    2.33    0.75
  12   9  -1    2.22    0.63
 -12  -9   1    4.24    0.76
 -12  -9   1    1.61    0.60
 -12  -9   1    3.63    0.74
 -12  -9   1    1.88    0.64
  11   9  -1    7.26    0.91
  11   9  -1    6.98    0.85
  11   9  -1    5.85    0.84
  11   9  -1    7.74    0.90
 -11  -9   1    7.22    0.85
 -11  -9   1    6.38    0.82
 -11  -9   1    6.76    0.84
 -11  -9   1    8.20    1.00
  10   9  -1   10.73    1.05
  10   9  -1   11.77    0.94
  10   9  -1   10.78    0.96
  10   9  -1   11.13    0.95
 -10  -9   1   10.13    0.94
 -10  -9   1    9.35    0.92
 -10  -9   1    9.73    0.96
 -10  -9   1    8.46    0.85
   9   9  -1   31.44    1.53
   9   9  -1   31.87    1.64
   9   9  -1   33.23    1.56
   9   9  -1   30.37    1.54
  -9  -9   1   31.40    1.52
  -9  -9   1   31.03    1.62
  -9  -9   1   31.77    1.55
  -9  -9   1   29.54    1.53
   8   9  -1   69.44    2.79
   8   9  -1   68.64    2.75
   8   9  -1   71.17    2.75
   8   9  -1   74.09    2.92
  -8  -9   1   69.27    2.78
  -8  -9   1   71.65    2.76
  -8  -9   1   72.16    2.91
  -8  -9   1   71.55    2.77
   7   9  -1   95.52    3.73
   7   9  -1   96.75    3.57
   7   9  -1   95.90    3.57
  -7  -9   1   96.92    3.62
  -7  -9   1   99.26    3.76
  -7  -9   1   98.30    3.57
  -7  -9   1  100.28    3.60
   6   9  -1   86.22    3.42
   6   9  -1   86.95    3.24
  -6  -9   1   91.52    3.27
  -6  -9   1   88.01    3.30
  -6  -9   1   87.20    3.24
  -6  -9   1   89.71    3.43
   5   9  -1  160.80    6.03
   5   9  -1  169.54    5.79
  -5  -9   1  161.97    5.77
  -5  -9   1  172.44    5.80
  -5  -9   1  172.08    5.90
  -5  -9   1  171.59    6.07
   4   9  -1  324.04   11.59
   4   9  -1  339.25   11.16
  -4  -9   1  340.07   11.62
  -4  -9   1  344.52   11.17
  -4  -9   1  327.96   11.14
   3   9  -1  185.09    6.25
   3   9  -1  177.90    6.50
  -3  -9   1  184.80    6.53
  -3  -9   1  183.86    6.25
  -3  -9   1  182.43    6.83
   2   9  -1   21.82    1.17
   2   9  -1   21.06    1.14
  -2  -9   1   21.64    1.09
  -2  -9   1   22.19    1.17
  -2  -9   1   19.83    1.18
   1   9  -1    5.73    0.65
  -1  -9   1    5.75    0.72
  -1  -9   1    6.81    0.70
  -1  -9   1    5.00    0.60
   0   9  -1    9.86    0.82
   0   9  -1   11.35    0.84
   0   9  -1   11.15    0.83
   0  -9   1   10.78    0.79
   0  -9   1    9.91    0.82
   0  -9   1   10.06    0.83
  -1   9  -1    6.96    0.75
  -1   9  -1    5.77    0.69
   1  -9   1    4.85    0.60
   1  -9   1    5.61    0.69
   1  -9   1    5.45    0.69
  -2   9  -1   18.96    1.17
  -2   9  -1   21.79    1.20
   2  -9   1   20.48    1.18
   2  -9   1   21.02    1.20
   2  -9   1   18.24    1.15
  -3   9  -1   10.43    0.88
  -3   9  -1   10.81    0.97
  -3   9  -1   10.85    0.89
   3  -9   1   10.32    0.89
   3  -9   1   11.32    0.91
   3  -9   1   10.05    0.95
  -4   9  -1    5.75    0.71
  -4   9  -1    6.33    0.78
  -4   9  -1    5.40    0.74
   4  -9   1    3.76    0.74
   4  -9   1    5.07    0.68
   4  -9   1    4.17    0.66
   4  -9   1    5.36    0.75
  -5   9  -1   60.21    2.70
  -5   9  -1   61.65    2.63
  -5   9  -1   63.47    2.67
   5  -9   1   60.94    2.63
   5  -9   1   63.38    2.71
   5  -9   1   60.86    2.65
   5  -9   1   63.46    2.76
  -6   9  -1   50.50    2.35
  -6   9  -1   53.50    2.42
  -6   9  -1   49.93    2.41
   6  -9   1   53.31    2.47
   6  -9   1   53.03    2.41
   6  -9   1   52.64    2.39
   6  -9   1   51.79    2.41
  -7   9  -1   17.49    1.29
  -7   9  -1   15.05    1.36
  -7   9  -1   15.67    1.28
   7  -9   1   14.43    1.40
   7  -9   1   16.55    1.36
   7  -9   1   17.33    1.28
   7  -9   1   15.71    1.28
  -8   9  -1    1.93    0.87
  -8   9  -1    1.22    0.68
  -8   9  -1    1.49    0.65
   8  -9   1    0.88    0.72
   8  -9   1    1.23    0.59
   8  -9   1    1.22    0.64
   8  -9   1    0.50    0.74
  -9   9  -1    2.29    0.79
  -9   9  -1    4.58    1.00
  -9   9  -1    4.46    0.88
   9  -9   1    3.15    0.89
   9  -9   1    3.05    0.74
   9  -9   1    3.00    0.79
 -10   9  -1    1.21    0.82
 -10   9  -1    2.91    0.79
 -10   9  -1    0.60    0.96
  10  -9   1    1.73    0.89
  10  -9   1    3.18    0.93
  10  -9   1    2.55    0.71
 -11   9  -1    1.99    1.14
 -11   9  -1    1.23    0.88
 -11   9  -1    0.15    0.87
  11  -9   1   -0.21    1.04
  11  -9   1    2.05    0.86
 -12   9  -1    0.52    0.93
 -12   9  -1   -0.47    0.98
 -12   9  -1   -0.20    1.24
  12  -9   1    1.11    1.17
  12  -9   1   -0.84    1.14
  12  -9   1    0.67    0.85
 -13   9  -1   -0.30    1.05
 -13   9  -1    0.14    1.29
 -13   9  -1   -0.89    1.26
  13  -9   1   -0.50    1.30
  13  -9   1    1.30    0.99
  13  -9   1    0.29    1.39
 -14   9  -1    0.30    1.39
 -14   9  -1    0.56    1.15
  14  -9   1    0.51    1.08
  14  -9   1    2.77    1.71
 -15   9  -1    0.68    1.41
 -15   9  -1    0.48    1.80
  15  -9   1    1.52    2.04
  21   8  -1   -0.14    2.05
  21   8  -1    1.06    1.86
 -21  -8   1   -0.98    1.64
 -21  -8   1   -0.68    1.87
 -21  -8   1   -1.74    1.42
 -21  -8   1    0.54    1.59
  20   8  -1    3.12    1.79
  20   8  -1    5.18    1.67
  20   8  -1    2.07    1.76
 -20  -8   1    4.55    1.48
 -20  -8   1    2.79    1.60
 -20  -8   1    1.57    1.42
 -20  -8   1    1.79    1.37
  19   8  -1    3.25    1.65
  19   8  -1    4.22    1.49
  19   8  -1    4.85    1.45
  19   8  -1    2.83    1.37
 -19  -8   1    1.61    1.40
 -19  -8   1    2.09    1.28
 -19  -8   1    2.50    1.25
 -19  -8   1    4.09    1.16
  18   8  -1    4.03    1.32
  18   8  -1    2.80    1.19
  18   8  -1    0.90    1.11
 -18  -8   1    2.41    1.13
 -18  -8   1    2.42    1.07
 -18  -8   1    1.92    1.23
 -18  -8   1    2.79    1.00
  17   8  -1   -0.05    1.03
  17   8  -1    0.24    1.05
  17   8  -1    1.84    1.10
  17   8  -1    2.01    1.04
 -17  -8   1    0.04    1.07
 -17  -8   1    2.00    1.00
 -17  -8   1    0.05    0.80
 -17  -8   1    0.66    0.84
  16   8  -1    2.18    0.99
  16   8  -1    0.04    0.90
  16   8  -1    0.55    0.90
  16   8  -1    0.67    0.82
 -16  -8   1    0.17    0.92
 -16  -8   1    0.24    0.72
 -16  -8   1    1.09    0.85
 -16  -8   1   -0.52    0.82
  15   8  -1   20.27    1.70
  15   8  -1   20.88    1.71
  15   8  -1   19.78    1.66
  15   8  -1   22.24    1.88
 -15  -8   1   20.14    1.68
 -15  -8   1   21.42    1.63
 -15  -8   1   22.17    1.70
  14   8  -1   11.19    1.41
  14   8  -1    8.41    1.19
  14   8  -1   12.02    1.46
  14   8  -1   12.45    1.28
 -14  -8   1   10.74    1.31
 -14  -8   1   12.67    1.33
 -14  -8   1    8.95    1.13
  13   8  -1   -0.07    0.67
  13   8  -1   -0.75    0.55
  13   8  -1   -0.40    0.59
  13   8  -1   -0.31    0.67
 -13  -8   1   -0.28    0.54
 -13  -8   1    0.01    0.61
 -13  -8   1   -0.41    0.59
 -13  -8   1   -0.72    0.59
  12   8  -1    3.57    0.75
  12   8  -1    5.43    0.78
  12   8  -1    3.94    0.78
  12   8  -1    3.64    0.76
 -12  -8   1    5.34    0.79
 -12  -8   1    6.21    0.89
 -12  -8   1    4.47    0.76
 -12  -8   1    4.64    0.81
  11   8  -1    1.82    0.67
  11   8  -1    1.13    0.53
  11   8  -1    2.13    0.62
  11   8  -1    2.45    0.61
 -11  -8   1    1.93    0.59
 -11  -8   1    2.84    0.65
 -11  -8   1    2.20    0.54
 -11  -8   1    1.74    0.52
  10   8  -1   45.35    2.10
  10   8  -1   44.23    2.01
  10   8  -1   43.83    1.98
  10   8  -1   46.75    2.03
 -10  -8   1   40.92    1.95
 -10  -8   1   45.15    2.10
 -10  -8   1   43.35    1.96
 -10  -8   1   45.48    2.02
   9   8  -1   79.70    3.11
   9   8  -1   80.30    3.23
   9   8  -1   82.46    3.09
   9   8  -1   84.02    3.15
  -9  -8   1   79.90    3.09
  -9  -8   1   79.99    3.12
  -9  -8   1   77.85    3.20
  -9  -8   1   80.15    3.08
   8   8  -1   74.52    2.85
   8   8  -1   74.42    2.82
   8   8  -1   73.56    2.96
   8   8  -1   73.44    2.86
  -8  -8   1   72.93    2.96
  -8  -8   1   72.37    2.82
  -8  -8   1   75.62    2.88
  -8  -8   1   73.19    2.82
   7   8  -1   84.88    3.11
   7   8  -1   84.74    3.17
   7   8  -1   81.36    3.11
   7   8  -1   85.28    3.27
  -7  -8   1   83.84    3.15
  -7  -8   1   82.03    3.27
  -7  -8   1   85.81    3.12
  -7  -8   1   84.22    3.12
   6   8  -1  122.55    4.53
   6   8  -1  125.37    4.35
   6   8  -1  120.22    4.34
  -6  -8   1  122.55    4.41
  -6  -8   1  123.20    4.54
  -6  -8   1  122.57    4.35
  -6  -8   1  126.13    4.35
   5   8  -1  101.83    3.91
   5   8  -1  102.99    3.74
  -5  -8   1  108.02    3.76
  -5  -8   1  108.96    3.94
  -5  -8   1  106.53    3.81
  -5  -8   1  104.36    3.74
   4   8  -1  270.79    9.29
   4   8  -1  272.09    8.94
  -4  -8   1  267.21    8.92
  -4  -8   1  267.59    9.30
  -4  -8   1  257.61    9.06
  -4  -8   1  267.75    8.93
   3   8  -1  111.61    3.85
   3   8  -1  107.57    4.02
  -3  -8   1  108.26    4.21
  -3  -8   1  109.95    4.03
  -3  -8   1  109.56    3.85
   2   8  -1   36.58    1.60
   2   8  -1   36.91    1.54
  -2  -8   1   36.98    1.53
  -2  -8   1   37.01    1.61
  -2  -8   1   35.20    1.66
   1   8  -1    8.61    0.70
   1   8  -1    9.75    0.71
  -1  -8   1    9.38    0.72
  -1  -8   1    7.77    0.71
  -1  -8   1    8.76    0.66
   0   8  -1    6.90    0.64
   0   8  -1    5.37    0.64
   0   8  -1    6.62    0.65
   0  -8   1    7.04    0.68
   0  -8   1    5.38    0.61
   0  -8   1    7.62    0.68
  -1   8  -1   22.52    1.17
  -1   8  -1   24.99    1.25
  -1   8  -1   23.91    1.21
   1  -8   1   24.18    1.21
   1  -8   1   24.53    1.25
   1  -8   1   22.90    1.19
  -2   8  -1    8.22    0.77
  -2   8  -1    9.91    0.76
   2  -8   1    7.84    0.75
   2  -8   1    9.69    0.77
   2  -8   1   10.28    0.79
  -3   8  -1   13.75    0.93
  -3   8  -1   11.83    0.95
  -3   8  -1   13.11    0.92
   3  -8   1   11.30    0.90
   3  -8   1   13.69    0.92
   3  -8   1   14.47    0.93
  -4   8  -1   24.71    1.29
  -4   8  -1   22.45    1.28
  -4   8  -1   23.13    1.31
   4  -8   1   22.63    1.28
   4  -8   1   23.51    1.27
   4  -8   1   23.56    1.28
   4  -8   1   23.55    1.36
  -5   8  -1   40.34    1.96
  -5   8  -1   45.07    2.00
  -5   8  -1   43.42    1.95
   5  -8   1   44.16    2.04
   5  -8   1   43.21    1.96
   5  -8   1   43.31    1.95
   5  -8   1   39.95    1.95
  -6   8  -1   63.46    2.73
  -6   8  -1   64.31    2.71
  -6   8  -1   62.66    2.66
   6  -8   1   68.62    2.81
   6  -8   1   61.10    2.68
   6  -8   1   60.60    2.69
   6  -8   1   61.55    2.68
  -7   8  -1   12.82    1.10
  -7   8  -1   12.06    1.15
  -7   8  -1   12.48    1.23
   7  -8   1   10.22    1.09
   7  -8   1   11.66    1.05
   7  -8   1   11.70    1.21
   7  -8   1   11.92    1.29
  -8   8  -1    3.55    0.71
  -8   8  -1    3.47    0.78
  -8   8  -1    3.55    0.77
   8  -8   1    3.52    0.79
   8  -8   1    1.58    0.74
   8  -8   1    3.15    0.69
  -9   8  -1    4.21    0.76
  -9   8  -1    3.97    0.93
  -9   8  -1    5.02    0.81
   9  -8   1    4.96    0.91
   9  -8   1    5.05    0.79
   9  -8   1    4.06    1.01
 -10   8  -1   -0.37    0.75
 -10   8  -1    0.21    0.67
 -10   8  -1    0.43    0.70
  10  -8   1    0.39    0.61
  10  -8   1    0.82    0.76
 -11   8  -1   -0.60    0.88
 -11   8  -1    0.39    0.77
 -11   8  -1    0.11    0.77
  11  -8   1    0.28    0.70
  11  -8   1   -1.38    0.91
 -12   8  -1    0.48    0.86
 -12   8  -1   -1.19    0.99
 -12   8  -1    0.44    0.98
  12  -8   1   -0.93    0.77
  12  -8   1    1.06    1.14
 -13   8  -1    1.39    1.16
 -13   8  -1    1.63    1.04
 -13   8  -1   -0.78    1.23
  13  -8   1   -1.81    1.13
  13  -8   1    0.25    1.36
  13  -8   1    0.28    0.92
 -14   8  -1   -2.23    1.19
 -14   8  -1    2.23    1.13
 -14   8  -1    0.18    1.42
  14  -8   1    1.79    1.41
  14  -8   1    1.44    0.99
  14  -8   1    0.28    1.58
 -15   8  -1    1.22    1.63
 -15   8  -1    2.18    1.29
  15  -8   1    0.50    1.82
 -16   8  -1    0.30    1.45
 -16   8  -1   -0.55    1.87
  21   7  -1    0.93    1.81
  21   7  -1    2.26    2.11
 -21  -7   1   -1.32    1.70
 -21  -7   1   -1.79    1.66
 -21  -7   1   -0.72    1.43
 -21  -7   1    2.74    2.10
  20   7  -1    2.43    1.73
  20   7  -1    0.57    1.53
  20   7  -1    1.87    1.65
 -20  -7   1    1.84    1.44
 -20  -7   1    5.05    1.56
 -20  -7   1    4.12    1.84
 -20  -7   1    2.90    1.41
  19   7  -1    0.81    1.54
  19   7  -1    3.27    1.50
  19   7  -1    1.30    1.32
  19   7  -1    3.28    1.57
 -19  -7   1    2.38    1.44
 -19  -7   1    3.46    1.29
 -19  -7   1    2.45    1.30
 -19  -7   1    3.44    1.41
  18   7  -1    1.50    1.17
  18   7  -1    2.70    1.33
  18   7  -1    2.27    1.22
 -18  -7   1    4.50    1.18
 -18  -7   1    5.35    1.32
 -18  -7   1    3.12    1.34
 -18  -7   1    3.05    1.07
  17   7  -1    1.31    1.27
  17   7  -1    3.18    1.00
  17   7  -1    2.43    1.05
  17   7  -1    3.87    1.10
 -17  -7   1    3.68    1.18
 -17  -7   1    5.04    1.12
 -17  -7   1    3.65    1.00
 -17  -7   1    4.91    0.98
  16   7  -1    1.84    0.97
  16   7  -1    1.14    0.82
  16   7  -1    0.71    1.01
  16   7  -1    0.01    0.92
 -16  -7   1    0.30    0.90
 -16  -7   1    1.22    0.84
 -16  -7   1    1.65    0.87
 -16  -7   1    0.59    0.74
  15   7  -1    5.60    1.01
  15   7  -1    5.96    1.12
  15   7  -1    7.14    1.04
  15   7  -1    4.08    0.92
 -15  -7   1    5.94    0.96
 -15  -7   1    4.76    0.96
 -15  -7   1    5.11    0.98
  14   7  -1    3.38    0.91
  14   7  -1    2.75    0.82
  14   7  -1    1.37    0.88
  14   7  -1    1.95    0.79
 -14  -7   1    1.70    0.78
 -14  -7   1    1.33    0.68
 -14  -7   1    2.39    0.81
  13   7  -1    8.26    1.04
  13   7  -1    8.80    1.05
  13   7  -1    7.63    1.01
  13   7  -1    6.64    0.94
 -13  -7   1    9.83    1.13
 -13  -7   1    6.72    0.87
 -13  -7   1    6.49    0.97
  12   7  -1    0.68    0.61
  12   7  -1    1.20    0.64
  12   7  -1    0.27    0.49
  12   7  -1    0.50    0.66
 -12  -7   1    1.10    0.60
 -12  -7   1   -0.03    0.56
 -12  -7   1    0.34    0.53
 -12  -7   1    1.10    0.49
  11   7  -1    0.54    0.47
  11   7  -1    0.32    0.50
  11   7  -1    0.76    0.52
  11   7  -1    0.16    0.47
 -11  -7   1    0.48    0.45
 -11  -7   1    0.50    0.50
 -11  -7   1    0.64    0.48
 -11  -7   1    0.25    0.45
  10   7  -1   41.64    1.99
  10   7  -1   40.30    1.89
  10   7  -1   41.56    1.89
  10   7  -1   42.62    1.89
 -10  -7   1   43.17    1.91
 -10  -7   1   41.47    1.87
 -10  -7   1   42.15    1.96
 -10  -7   1   38.62    1.85
   9   7  -1   86.18    3.35
   9   7  -1   89.30    3.48
   9   7  -1   89.04    3.38
   9   7  -1   91.14    3.34
  -9  -7   1   89.25    3.34
  -9  -7   1   84.51    3.32
  -9  -7   1   87.89    3.37
  -9  -7   1   91.43    3.49
   8   7  -1   52.52    2.16
   8   7  -1   50.81    2.24
   8   7  -1   51.00    2.13
   8   7  -1   50.68    2.11
  -8  -7   1   52.26    2.22
  -8  -7   1   52.99    2.17
  -8  -7   1   53.92    2.13
  -8  -7   1   54.41    2.14
   7   7  -1   30.62    1.39
   7   7  -1   30.14    1.48
   7   7  -1   29.90    1.40
   7   7  -1   29.90    1.40
  -7  -7   1   30.90    1.41
  -7  -7   1   33.03    1.41
  -7  -7   1   30.81    1.48
  -7  -7   1   30.99    1.41
   6   7  -1  113.59    3.90
   6   7  -1  107.68    3.90
   6   7  -1  108.16    4.07
   6   7  -1  111.15    3.96
  -6  -7   1  111.66    3.92
  -6  -7   1  111.29    3.91
  -6  -7   1  110.27    3.95
  -6  -7   1  107.78    4.08
   5   7  -1   93.50    3.45
   5   7  -1   93.77    3.61
   5   7  -1   99.59    3.47
  -5  -7   1  100.82    3.48
  -5  -7   1   94.94    3.51
  -5  -7   1  102.19    3.47
  -5  -7   1   97.75    3.63
   4   7  -1    1.68    0.37
   4   7  -1    2.27    0.43
  -4  -7   1    2.06    0.37
  -4  -7   1    1.76    0.36
  -4  -7   1    2.45    0.39
  -4  -7   1    2.00    0.37
   3   7  -1   79.86    2.86
   3   7  -1   77.98    2.98
  -3  -7   1   79.99    2.85
  -3  -7   1   80.61    2.99
   2   7  -1   23.98    1.10
   2   7  -1   23.47    1.15
  -2  -7   1   25.69    1.21
  -2  -7   1   25.18    1.10
  -2  -7   1   25.37    1.17
   1   7  -1    2.09    0.37
   1   7  -1    1.41    0.31
  -1  -7   1    1.48    0.32
  -1  -7   1    1.88    0.35
  -1  -7   1    1.54    0.33
   0   7  -1    2.12    0.39
   0   7  -1    2.80    0.44
   0   7  -1    1.79    0.38
   0  -7   1    1.03    0.31
   0  -7   1    1.56    0.33
   0  -7   1    2.04    0.35
  -1   7  -1   30.82    1.40
  -1   7  -1   34.12    1.46
  -1   7  -1   29.60    1.37
   1  -7   1   31.42    1.41
   1  -7   1   30.69    1.37
   1  -7   1   32.76    1.47
  -2   7  -1   44.94    1.91
  -2   7  -1   45.97    1.84
   2  -7   1   43.75    1.91
   2  -7   1   42.19    1.80
   2  -7   1   45.05    1.86
  -3   7  -1    2.43    0.48
  -3   7  -1    3.02    0.52
  -3   7  -1    2.66    0.45
   3  -7   1    2.33    0.44
   3  -7   1    2.82    0.47
   3  -7   1    2.13    0.44
  -4   7  -1   38.28    1.68
  -4   7  -1   38.11    1.68
  -4   7  -1   37.36    1.70
   4  -7   1   36.75    1.75
   4  -7   1   35.50    1.64
   4  -7   1   37.25    1.67
   4  -7   1   35.73    1.69
  -5   7  -1   50.17    2.07
  -5   7  -1   47.97    2.02
  -5   7  -1   45.48    2.05
   5  -7   1   45.83    2.10
   5  -7   1   46.18    2.02
   5  -7   1   46.18    2.02
   5  -7   1   43.21    2.03
  -6   7  -1   23.04    1.37
  -6   7  -1   23.84    1.34
  -6   7  -1   21.57    1.28
   6  -7   1   22.75    1.35
   6  -7   1   21.11    1.26
   6  -7   1   21.25    1.36
  -7   7  -1    0.22    0.51
  -7   7  -1    0.37    0.60
  -7   7  -1    1.64    0.52
   7  -7   1    1.15    0.70
   7  -7   1    0.85    0.47
   7  -7   1   -0.30    0.55
  -8   7  -1    1.01    0.56
  -8   7  -1    0.64    0.65
  -8   7  -1    0.66    0.52
   8  -7   1   -0.07    0.64
   8  -7   1    0.86    0.74
   8  -7   1    0.44    0.47
  -9   7  -1    3.49    0.90
  -9   7  -1    3.61    0.81
  -9   7  -1    3.18    0.71
   9  -7   1    3.80    0.67
   9  -7   1    3.04    0.85
   9  -7   1    2.87    0.79
 -10   7  -1    4.02    0.95
 -10   7  -1    3.11    0.75
 -10   7  -1    4.21    0.86
  10  -7   1    4.03    0.95
  10  -7   1    4.59    0.76
  10  -7   1    3.93    0.94
 -11   7  -1    0.80    0.90
 -11   7  -1    0.23    0.67
 -11   7  -1    0.34    0.69
  11  -7   1   -0.87    0.77
  11  -7   1   -0.78    0.56
 -12   7  -1    1.60    0.83
 -12   7  -1    1.59    0.91
 -12   7  -1    0.64    1.07
  12  -7   1    0.89    1.00
  12  -7   1    1.23    0.74
 -13   7  -1    2.89    1.20
 -13   7  -1    0.71    0.92
 -13   7  -1    1.34    0.93
  13  -7   1    1.46    0.82
  13  -7   1    0.91    1.09
  13  -7   1   -0.80    1.15
 -14   7  -1    4.69    1.17
 -14   7  -1    1.58    1.19
 -14   7  -1    2.84    1.36
  14  -7   1    1.57    1.42
  14  -7   1    4.91    1.24
 -15   7  -1    1.99    1.48
 -15   7  -1    2.97    1.44
 -15   7  -1    3.25    1.22
  15  -7   1    2.58    1.74
 -16   7  -1   -0.12    1.37
 -16   7  -1   -1.15    1.61
  16  -7   1   -2.52    1.72
  21   6  -1   -0.33    1.80
  21   6  -1    0.80    2.17
 -21  -6   1    1.58    2.03
 -21  -6   1   -1.34    1.52
 -21  -6   1    2.81    1.63
 -21  -6   1    4.24    1.78
  20   6  -1   -0.65    1.93
  20   6  -1   -0.88    1.54
 -20  -6   1   -1.93    1.39
 -20  -6   1    2.57    1.64
 -20  -6   1   -0.94    1.45
 -20  -6   1   -0.26    1.22
  19   6  -1    3.39    1.36
  19   6  -1    2.71    1.50
  19   6  -1    0.78    1.51
  19   6  -1   -1.13    1.53
 -19  -6   1    0.74    1.43
 -19  -6   1   -0.27    1.22
 -19  -6   1   -0.32    1.13
 -19  -6   1    1.35    1.35
  18   6  -1    3.23    1.24
  18   6  -1    3.30    1.29
  18   6  -1    2.13    1.35
 -18  -6   1    1.69    1.25
 -18  -6   1    0.15    1.10
 -18  -6   1    2.52    1.20
 -18  -6   1    1.44    1.02
  17   6  -1   -2.11    1.09
  17   6  -1    0.57    1.11
  17   6  -1   -0.54    1.07
  17   6  -1    0.42    0.99
 -17  -6   1    0.83    0.83
 -17  -6   1    0.28    0.89
 -17  -6   1   -0.91    0.84
 -17  -6   1   -0.65    1.02
  16   6  -1    2.57    0.93
  16   6  -1    2.77    1.03
  16   6  -1    1.93    1.07
  16   6  -1    2.88    0.93
 -16  -6   1    2.05    0.73
 -16  -6   1    2.59    0.99
 -16  -6   1    2.87    0.90
 -16  -6   1    1.78    0.92
  15   6  -1   -0.03    0.78
  15   6  -1    0.92    0.86
  15   6  -1    0.83    0.76
  15   6  -1    0.55    0.72
 -15  -6   1    0.53    0.76
 -15  -6   1    0.13    0.73
 -15  -6   1   -0.36    0.71
 -15  -6   1    0.35    0.61
  14   6  -1    2.70    0.83
  14   6  -1    3.00    0.83
  14   6  -1    2.95    0.90
  14   6  -1    2.47    0.78
 -14  -6   1    3.36    0.82
 -14  -6   1    2.17    0.73
 -14  -6   1    2.76    0.82
 -14  -6   1    2.02    0.66
  13   6  -1   30.49    1.79
  13   6  -1   30.00    1.75
  13   6  -1   28.23    1.69
  13   6  -1   28.53    1.70
 -13  -6   1   28.18    1.69
 -13  -6   1   27.89    1.66
 -13  -6   1   28.84    1.71
  12   6  -1   14.27    1.20
  12   6  -1   16.21    1.21
  12   6  -1   16.23    1.33
  12   6  -1   15.79    1.22
 -12  -6   1   16.19    1.18
 -12  -6   1   14.78    1.21
 -12  -6   1   15.39    1.19
  11   6  -1    3.33    0.62
  11   6  -1    1.89    0.62
  11   6  -1    3.18    0.67
  11   6  -1    2.78    0.62
 -11  -6   1    3.00    0.62
 -11  -6   1    2.69    0.62
 -11  -6   1    3.73    0.68
  10   6  -1    0.48    0.48
  10   6  -1   -0.24    0.37
  10   6  -1    0.74    0.46
  10   6  -1    0.03    0.40
 -10  -6   1    0.18    0.41
 -10  -6   1    0.16    0.41
 -10  -6   1    0.20    0.41
 -10  -6   1    1.05    0.51
   9   6  -1   21.74    1.22
   9   6  -1   21.15    1.20
   9   6  -1   20.05    1.25
   9   6  -1   22.77    1.20
  -9  -6   1   21.30    1.17
  -9  -6   1   20.25    1.24
  -9  -6   1   22.82    1.18
  -9  -6   1   21.29    1.19
   8   6  -1   34.39    1.62
   8   6  -1   34.43    1.55
   8   6  -1   32.84    1.51
   8   6  -1   32.94    1.53
  -8  -6   1   33.41    1.59
  -8  -6   1   34.85    1.55
  -8  -6   1   32.67    1.51
  -8  -6   1   34.28    1.52
   7   6  -1   11.19    0.76
   7   6  -1   11.23    0.78
   7   6  -1   10.23    0.76
   7   6  -1   10.45    0.81
  -7  -6   1   10.09    0.80
  -7  -6   1   10.04    0.74
  -7  -6   1   11.11    0.76
  -7  -6   1   10.96    0.76
   6   6  -1   80.42    2.87
   6   6  -1   80.23    2.88
   6   6  -1   76.82    3.00
   6   6  -1   78.98    2.90
  -6  -6   1   79.07    2.86
  -6  -6   1   74.55    2.98
  -6  -6   1   78.23    2.87
  -6  -6   1   78.78    2.90
   5   6  -1  341.15   11.33
   5   6  -1  334.23   11.76
   5   6  -1  326.82   11.48
   5   6  -1  350.52   11.34
  -5  -6   1  348.35   11.33
  -5  -6   1  341.78   11.50
  -5  -6   1  340.98   11.77
  -5  -6   1  358.75   11.35
   4   6  -1   81.41    3.08
   4   6  -1   86.20    2.97
   4   6  -1   84.44    2.96
  -4  -6   1   83.08    2.95
  -4  -6   1   84.36    3.09
  -4  -6   1   84.09    2.96
  -4  -6   1   78.99    2.98
   3   6  -1   38.05    1.54
   3   6  -1   37.58    1.47
  -3  -6   1   36.59    1.46
  -3  -6   1   37.24    1.55
  -3  -6   1   37.18    1.47
   2   6  -1   23.42    1.02
   2   6  -1   22.27    1.07
  -2  -6   1   25.85    1.14
  -2  -6   1   23.82    1.01
  -2  -6   1   22.93    1.08
   1   6  -1    6.44    0.51
   1   6  -1    6.52    0.49
  -1  -6   1    5.84    0.51
  -1  -6   1    5.70    0.46
  -1  -6   1    5.67    0.51
   0   6  -1    1.07    0.27
   0   6  -1    0.97    0.28
   0   6  -1    0.75    0.27
   0  -6   1    0.87    0.24
   0  -6   1    1.32    0.30
   0  -6   1    0.77    0.27
  -1   6  -1   37.38    1.51
  -1   6  -1   36.28    1.53
  -1   6  -1   35.75    1.59
   1  -6   1   38.05    1.51
   1  -6   1   38.36    1.61
   1  -6   1   37.03    1.55
  -2   6  -1   45.64    1.94
  -2   6  -1   47.08    1.85
   2  -6   1   47.73    1.85
   2  -6   1   45.08    1.87
   2  -6   1   46.69    1.95
  -3   6  -1   24.60    1.20
  -3   6  -1   23.77    1.20
  -3   6  -1   24.21    1.18
   3  -6   1   25.48    1.19
   3  -6   1   24.58    1.18
   3  -6   1   23.89    1.20
  -4   6  -1    4.48    0.58
  -4   6  -1    6.04    0.66
  -4   6  -1    4.82    0.61
   4  -6   1    5.04    0.61
   4  -6   1    5.23    0.61
   4  -6   1    4.75    0.63
   4  -6   1    4.70    0.54
  -5   6  -1   72.67    3.03
  -5   6  -1   75.87    2.92
  -5   6  -1   79.89    2.96
   5  -6   1   76.42    3.01
   5  -6   1   78.77    2.94
   5  -6   1   75.10    3.04
  -6   6  -1   42.01    1.93
  -6   6  -1   42.27    1.93
  -6   6  -1   44.55    1.93
   6  -6   1   40.69    1.90
   6  -6   1   44.55    2.02
   6  -6   1   43.06    1.92
  -7   6  -1   20.16    1.23
  -7   6  -1   20.83    1.35
  -7   6  -1   20.17    1.27
   7  -6   1   20.42    1.20
   7  -6   1   20.71    1.36
   7  -6   1   17.69    1.28
  -8   6  -1   14.96    1.22
  -8   6  -1   12.88    1.12
  -8   6  -1   11.93    1.04
   8  -6   1   14.16    1.32
   8  -6   1   13.66    1.18
   8  -6   1   12.76    1.05
  -9   6  -1    0.51    0.54
  -9   6  -1    0.84    0.68
  -9   6  -1    1.47    0.54
   9  -6   1    1.58    0.74
   9  -6   1    1.28    0.71
   9  -6   1    1.39    0.53
 -10   6  -1    7.78    0.98
 -10   6  -1   10.13    1.11
 -10   6  -1    9.05    1.18
  10  -6   1   12.32    1.42
  10  -6   1    7.91    1.14
  10  -6   1   10.30    1.04
 -11   6  -1    4.85    0.82
 -11   6  -1    4.56    1.00
 -11   6  -1    4.53    0.83
  11  -6   1    3.29    0.91
  11  -6   1    4.52    0.76
  11  -6   1    2.02    0.89
 -12   6  -1    2.66    0.90
 -12   6  -1    2.06    0.83
 -12   6  -1    3.41    0.98
  12  -6   1    3.02    0.75
  12  -6   1    1.48    0.91
  12  -6   1    0.64    0.85
 -13   6  -1    4.10    1.17
 -13   6  -1    2.49    0.95
 -13   6  -1    0.47    0.85
  13  -6   1   -0.23    0.85
  13  -6   1    2.14    0.76
  13  -6   1    1.62    1.15
 -14   6  -1    4.58    1.31
 -14   6  -1    5.83    1.17
 -14   6  -1    1.66    1.14
  14  -6   1    4.41    1.31
  14  -6   1    4.86    1.37
 -15   6  -1    1.17    1.31
 -15   6  -1    3.78    1.17
 -15   6  -1    3.54    1.43
  15  -6   1    3.87    1.58
  15  -6   1    5.85    1.46
 -16   6  -1   -0.12    1.57
 -16   6  -1   -0.42    1.34
 -16   6  -1    1.00    1.19
  16  -6   1   -0.12    1.60
 -17   6  -1    0.92    1.74
 -17   6  -1   -1.78    1.36
  21   5  -1    0.44    1.94
 -21  -5   1   -2.71    1.42
 -21  -5   1   -2.72    1.58
 -21  -5   1    3.58    1.77
  20   5  -1    0.60    1.98
  20   5  -1    0.72    1.66
 -20  -5   1    0.95    1.69
 -20  -5   1    1.50    1.34
 -20  -5   1   -0.75    1.33
 -20  -5   1    2.73    1.58
  19   5  -1   -1.02    1.49
  19   5  -1    0.16    1.44
  19   5  -1    4.63    1.65
  19   5  -1    0.32    1.41
 -19  -5   1   -1.63    1.23
 -19  -5   1   -0.37    1.13
 -19  -5   1   -1.58    1.28
 -19  -5   1    2.13    1.55
  18   5  -1    7.63    1.50
  18   5  -1    4.58    1.40
  18   5  -1    3.21    1.38
 -18  -5   1    5.34    1.40
 -18  -5   1    5.42    1.44
 -18  -5   1    5.39    1.48
 -18  -5   1    3.90    1.13
  17   5  -1    3.92    1.17
  17   5  -1    1.81    1.15
  17   5  -1    3.86    1.30
  17   5  -1    3.27    1.29
 -17  -5   1    3.05    1.01
 -17  -5   1    2.61    1.08
 -17  -5   1    3.11    1.11
 -17  -5   1    3.03    1.21
  16   5  -1    0.35    0.90
  16   5  -1   -0.50    0.87
  16   5  -1    1.15    0.93
  16   5  -1    1.52    0.90
 -16  -5   1   -0.50    0.94
 -16  -5   1    1.36    0.87
 -16  -5   1    0.72    0.89
 -16  -5   1    2.36    0.82
  15   5  -1    2.37    0.88
  15   5  -1    2.41    0.93
  15   5  -1    1.99    0.93
  15   5  -1    2.21    0.85
 -15  -5   1    1.10    0.76
 -15  -5   1    2.91    0.73
 -15  -5   1    1.60    0.86
 -15  -5   1    1.83    0.82
  14   5  -1    1.87    0.89
  14   5  -1    2.99    0.81
  14   5  -1    2.15    0.86
  14   5  -1    3.89    0.85
 -14  -5   1    2.05    0.70
 -14  -5   1    2.65    0.86
 -14  -5   1    2.30    0.71
 -14  -5   1    2.38    0.78
  13   5  -1   38.54    1.96
  13   5  -1   35.61    2.02
  13   5  -1   33.86    1.94
  13   5  -1   34.03    1.91
 -13  -5   1   37.08    1.92
 -13  -5   1   32.62    1.84
 -13  -5   1   34.87    1.88
 -13  -5   1   33.99    1.89
  12   5  -1   29.73    1.64
  12   5  -1   30.13    1.71
  12   5  -1   29.56    1.67
  12   5  -1   32.86    1.77
 -12  -5   1   30.51    1.66
 -12  -5   1   27.78    1.63
 -12  -5   1   29.66    1.65
  11   5  -1    2.65    0.61
  11   5  -1    2.54    0.62
  11   5  -1    1.84    0.53
  11   5  -1    2.28    0.52
 -11  -5   1    2.03    0.53
 -11  -5   1    1.96    0.51
 -11  -5   1    1.82    0.57
  10   5  -1   13.70    1.00
  10   5  -1   12.01    1.01
  10   5  -1   13.51    0.97
  10   5  -1   11.86    0.95
 -10  -5   1   10.61    0.95
 -10  -5   1   11.95    0.96
 -10  -5   1   13.06    0.95
   9   5  -1    3.41    0.57
   9   5  -1    4.26    0.59
   9   5  -1    4.49    0.64
   9   5  -1    4.05    0.63
  -9  -5   1    3.72    0.59
  -9  -5   1    2.86    0.50
  -9  -5   1    3.40    0.54
  -9  -5   1    3.38    0.55
   8   5  -1    3.21    0.52
   8   5  -1    4.02    0.58
   8   5  -1    2.67    0.45
   8   5  -1    3.97    0.61
  -8  -5   1    5.27    0.65
  -8  -5   1    4.34    0.53
  -8  -5   1    3.93    0.53
  -8  -5   1    3.53    0.54
   7   5  -1    7.86    0.66
   7   5  -1    9.49    0.73
   7   5  -1    8.38    0.69
   7   5  -1    7.77    0.71
  -7  -5   1    9.33    0.74
  -7  -5   1    8.84    0.69
  -7  -5   1    8.85    0.71
  -7  -5   1    8.75    0.67
   6   5  -1   83.81    3.06
   6   5  -1   84.62    3.09
   6   5  -1   86.39    3.08
   6   5  -1   83.32    3.19
  -6  -5   1   82.55    3.05
  -6  -5   1   87.60    3.08
  -6  -5   1   87.67    3.11
  -6  -5   1   83.80    3.18
   5   5  -1  235.86    8.09
   5   5  -1  240.29    8.20
   5   5  -1  246.01    8.09
   5   5  -1  243.80    8.40
  -5  -5   1  240.42    8.40
  -5  -5   1  240.81    8.09
  -5  -5   1  240.19    8.20
  -5  -5   1  253.41    8.11
   4   5  -1  143.16    4.69
   4   5  -1  135.26    4.74
   4   5  -1  136.58    4.87
   4   5  -1  135.53    4.68
  -4  -5   1  139.49    4.88
  -4  -5   1  141.39    4.69
  -4  -5   1  132.03    4.73
  -4  -5   1  137.88    4.68
   3   5  -1   34.77    1.46
   3   5  -1   37.63    1.40
  -3  -5   1   39.15    1.42
  -3  -5   1   33.62    1.40
  -3  -5   1   37.20    1.40
  -3  -5   1   35.43    1.47
   2   5  -1   66.65    2.53
   2   5  -1   70.83    2.44
  -2  -5   1   70.27    2.44
  -2  -5   1   68.23    2.55
   1   5  -1   15.89    0.83
   1   5  -1   17.82    0.80
  -1  -5   1   17.25    0.89
  -1  -5   1   19.10    0.81
  -1  -5   1   18.14    0.85
   0   5  -1   40.71    1.77
   0   5  -1   47.29    1.66
   0   5  -1   42.22    1.70
   0  -5   1   41.35    1.78
   0  -5   1   44.31    1.71
   0  -5   1   45.19    1.65
  -1   5  -1   85.29    3.26
  -1   5  -1   82.56    3.11
  -1   5  -1   85.74    3.03
   1  -5   1   87.50    3.27
   1  -5   1   89.03    3.13
   1  -5   1   86.20    3.02
  -2   5  -1  143.54    4.85
  -2   5  -1  137.09    5.22
   2  -5   1  141.22    4.99
   2  -5   1  145.71    5.23
   2  -5   1  140.81    4.85
  -3   5  -1  326.57   10.46
  -3   5  -1  316.95   11.30
  -3   5  -1  322.58   10.46
   3  -5   1  309.19   10.62
   3  -5   1  305.26   11.29
   3  -5   1  306.92   10.44
   3  -5   1  313.42   10.78
  -4   5  -1  110.06    3.88
  -4   5  -1  108.88    4.13
  -4   5  -1  115.77    3.91
   4  -5   1  104.16    3.96
   4  -5   1  108.61    3.89
   4  -5   1  106.02    4.11
  -5   5  -1   55.04    2.19
  -5   5  -1   53.41    2.26
  -5   5  -1   56.20    2.22
   5  -5   1   56.63    2.28
   5  -5   1   54.66    2.26
   5  -5   1   52.93    2.18
  -6   5  -1   55.14    2.26
  -6   5  -1   53.55    2.28
  -6   5  -1   54.38    2.24
   6  -5   1   53.75    2.27
   6  -5   1   53.48    2.24
   6  -5   1   56.73    2.33
  -7   5  -1   36.81    1.74
  -7   5  -1   38.76    1.76
  -7   5  -1   36.28    1.77
   7  -5   1   36.60    1.85
   7  -5   1   36.77    1.76
   7  -5   1   37.76    1.73
  -8   5  -1   30.50    1.58
  -8   5  -1   29.39    1.61
  -8   5  -1   29.27    1.56
   8  -5   1   30.21    1.53
   8  -5   1   30.48    1.73
   8  -5   1   27.93    1.58
   8  -5   1   29.01    1.60
  -9   5  -1    5.33    0.72
  -9   5  -1    4.78    0.84
  -9   5  -1    4.89    0.79
   9  -5   1    4.96    0.86
   9  -5   1    4.87    0.81
   9  -5   1    5.65    0.73
   9  -5   1    2.87    0.72
 -10   5  -1   -0.50    0.69
 -10   5  -1   -0.39    0.53
 -10   5  -1    0.00    0.52
  10  -5   1   -0.32    0.46
  10  -5   1   -0.02    0.55
  10  -5   1   -0.59    0.59
  10  -5   1    0.15    0.61
 -11   5  -1    5.08    0.81
 -11   5  -1    3.82    0.91
 -11   5  -1    4.41    0.85
  11  -5   1    3.48    0.86
  11  -5   1    4.50    0.93
  11  -5   1    4.78    0.92
  11  -5   1    5.26    0.75
 -12   5  -1   10.71    1.29
 -12   5  -1   12.34    1.46
 -12   5  -1   10.45    1.31
  12  -5   1   11.71    1.21
  12  -5   1   12.20    1.53
  12  -5   1    9.38    1.14
  12  -5   1    8.00    1.23
 -13   5  -1    6.68    1.12
 -13   5  -1    5.49    1.01
 -13   5  -1    7.77    1.06
  13  -5   1    5.61    1.09
  13  -5   1    4.52    1.01
  13  -5   1    5.43    1.24
 -14   5  -1    4.34    1.16
 -14   5  -1    3.72    1.28
 -14   5  -1    5.68    1.09
  14  -5   1    4.58    1.22
  14  -5   1    2.91    1.13
  14  -5   1    3.61    1.22
 -15   5  -1    3.76    1.19
 -15   5  -1    2.63    1.23
 -15   5  -1    2.12    1.28
  15  -5   1    3.39    1.20
  15  -5   1    0.93    1.42
  15  -5   1    3.91    1.42
 -16   5  -1   -2.18    1.33
 -16   5  -1    0.23    1.25
 -16   5  -1   -0.45    1.08
  16  -5   1    0.38    1.45
  16  -5   1   -0.55    1.39
  16  -5   1   -0.47    1.15
 -17   5  -1    1.83    1.77
 -17   5  -1   -0.56    1.31
  17  -5   1    2.21    1.80
 -18   5  -1    1.39    1.58
 -18   5  -1    2.76    1.92
  18  -5   1    2.73    2.19
 -21  -4   1    0.91    1.81
 -21  -4   1    0.87    1.85
 -21  -4   1   -1.29    1.51
  20   4  -1    1.94    2.00
  20   4  -1    0.79    1.74
 -20  -4   1   -1.90    1.72
 -20  -4   1    3.56    1.63
 -20  -4   1    1.94    1.39
 -20  -4   1    1.55    1.47
  19   4  -1    0.17    1.37
  19   4  -1   -1.06    1.48
  19   4  -1    0.45    1.73
  19   4  -1    2.74    1.51
 -19  -4   1   -1.03    1.25
 -19  -4   1    0.53    1.19
 -19  -4   1   -0.73    1.40
 -19  -4   1    0.98    1.54
  18   4  -1    5.05    1.37
  18   4  -1    6.31    1.56
  18   4  -1    6.98    1.49
 -18  -4   1    4.33    1.56
 -18  -4   1    7.67    1.62
 -18  -4   1    5.34    1.24
 -18  -4   1    6.20    1.41
  17   4  -1    8.26    1.50
  17   4  -1   10.57    1.56
  17   4  -1    6.95    1.36
  17   4  -1    6.38    1.31
 -17  -4   1    7.38    1.45
 -17  -4   1    7.04    1.17
 -17  -4   1    6.40    1.36
 -17  -4   1    7.39    1.35
  16   4  -1    5.87    1.10
  16   4  -1    5.92    1.18
  16   4  -1    6.57    1.30
  16   4  -1    6.29    1.34
 -16  -4   1    5.42    1.13
 -16  -4   1    6.54    1.19
 -16  -4   1    6.12    1.00
 -16  -4   1    5.12    1.20
  15   4  -1   12.71    1.56
  15   4  -1    7.76    1.17
  15   4  -1   11.53    1.37
  15   4  -1    9.42    1.31
 -15  -4   1    7.39    1.11
 -15  -4   1   11.52    1.47
 -15  -4   1   11.49    1.29
 -15  -4   1    8.62    1.15
  14   4  -1    8.06    1.19
  14   4  -1    7.91    1.01
  14   4  -1    7.52    1.08
  14   4  -1    8.51    1.11
 -14  -4   1    6.81    1.05
 -14  -4   1    8.16    1.07
 -14  -4   1    8.08    1.11
 -14  -4   1    9.12    1.13
  13   4  -1   39.16    1.95
  13   4  -1   37.16    2.02
  13   4  -1   35.30    1.95
  13   4  -1   37.34    2.05
 -13  -4   1   35.84    1.93
 -13  -4   1   33.77    1.88
 -13  -4   1   34.67    1.94
 -13  -4   1   35.88    1.96
  12   4  -1   26.55    1.56
  12   4  -1   28.00    1.65
  12   4  -1   26.15    1.59
  12   4  -1   27.68    1.66
 -12  -4   1   25.45    1.49
 -12  -4   1   27.27    1.57
 -12  -4   1   27.71    1.58
 -12  -4   1   29.08    1.59
  11   4  -1    3.53    0.63
  11   4  -1    4.21    0.71
  11   4  -1    4.38    0.67
  11   4  -1    5.19    0.74
 -11  -4   1    3.77    0.57
 -11  -4   1    5.27    0.72
 -11  -4   1    3.86    0.66
 -11  -4   1    2.30    0.53
  10   4  -1   10.05    0.88
  10   4  -1    9.18    0.87
  10   4  -1    7.61    0.81
  10   4  -1    9.57    0.91
 -10  -4   1    9.17    0.84
 -10  -4   1    8.00    0.82
 -10  -4   1    8.01    0.84
   9   4  -1    3.22    0.52
   9   4  -1    4.62    0.63
   9   4  -1    4.45    0.62
   9   4  -1    3.48    0.54
  -9  -4   1    3.79    0.60
  -9  -4   1    3.28    0.51
  -9  -4   1    3.06    0.53
   8   4  -1    0.69    0.35
   8   4  -1    1.27    0.41
   8   4  -1    0.89    0.38
   8   4  -1    0.51    0.37
  -8  -4   1    1.21    0.39
  -8  -4   1    0.99    0.42
  -8  -4   1    1.06    0.38
  -8  -4   1    0.56    0.33
   7   4  -1    8.39    0.69
   7   4  -1    9.34    0.75
   7   4  -1    9.67    0.71
   7   4  -1    8.78    0.71
  -7  -4   1    8.95    0.68
  -7  -4   1    7.85    0.68
  -7  -4   1    8.84    0.73
  -7  -4   1    9.05    0.69
   6   4  -1   25.09    1.15
   6   4  -1   25.53    1.17
   6   4  -1   25.38    1.21
   6   4  -1   26.18    1.17
  -6  -4   1   26.00    1.16
  -6  -4   1   25.19    1.15
  -6  -4   1   25.94    1.20
  -6  -4   1   25.98    1.17
   5   4  -1  282.66    9.42
   5   4  -1  284.54    9.54
   5   4  -1  285.24    9.76
   5   4  -1  291.89    9.42
  -5  -4   1  283.74    9.76
  -5  -4   1  277.02    9.40
  -5  -4   1  282.87    9.42
  -5  -4   1  284.06    9.54
   4   4  -1  390.74   13.30
   4   4  -1  408.63   13.13
   4   4  -1  400.23   13.61
   4   4  -1  413.45   13.12
  -4  -4   1  402.38   13.61
  -4  -4   1  393.97   13.30
  -4  -4   1  397.74   13.12
  -4  -4   1  396.35   13.11
   3   4  -1   43.87    1.58
   3   4  -1   41.64    1.58
   3   4  -1   45.81    1.59
   3   4  -1   42.29    1.65
  -3  -4   1   39.98    1.58
  -3  -4   1   41.54    1.65
  -3  -4   1   44.39    1.59
  -3  -4   1   41.70    1.57
   2   4  -1  355.30   11.49
   2   4  -1  340.22   11.92
  -2  -4   1  348.03   11.93
  -2  -4   1  361.71   11.50
  -2  -4   1  351.32   11.49
   1   4  -1    8.29    0.50
   1   4  -1    9.14    0.47
  -1  -4   1    6.33    0.47
  -1  -4   1    6.82    0.44
  -1  -4   1    7.17    0.50
   0   4  -1    4.51    0.38
   0   4  -1    3.93    0.38
   0   4  -1    4.48    0.42
   0  -4   1    4.42    0.40
   0  -4   1    4.55    0.42
   0  -4   1    3.81    0.37
  -1   4  -1    1.30    0.27
  -1   4  -1    0.75    0.22
  -1   4  -1    0.83    0.24
   1  -4   1    0.77    0.21
   1  -4   1    0.79    0.22
   1  -4   1    0.66    0.22
  -2   4  -1  153.23    5.10
  -2   4  -1  150.92    5.50
   2  -4   1  148.40    5.50
   2  -4   1  151.42    5.10
   2  -4   1  150.03    5.25
  -3   4  -1  184.92    5.99
  -3   4  -1  178.17    5.98
  -3   4  -1  175.56    6.43
   3  -4   1  174.93    5.97
   3  -4   1  176.49    6.09
   3  -4   1  169.64    6.42
  -4   4  -1  188.34    6.51
  -4   4  -1  188.98    7.00
  -4   4  -1  201.74    6.54
   4  -4   1  197.24    6.64
   4  -4   1  187.59    7.00
   4  -4   1  190.04    6.52
  -5   4  -1   59.14    2.17
  -5   4  -1   52.78    2.19
  -5   4  -1   54.35    2.13
   5  -4   1   52.34    2.18
   5  -4   1   53.74    2.14
   5  -4   1   50.82    2.18
  -6   4  -1   81.75    3.01
  -6   4  -1   77.78    2.98
  -6   4  -1   77.79    3.11
   6  -4   1   79.13    2.98
   6  -4   1   75.69    3.10
   6  -4   1   79.94    3.07
   6  -4   1   82.47    3.01
  -7   4  -1   27.86    1.39
  -7   4  -1   28.77    1.44
  -7   4  -1   27.00    1.36
  -7   4  -1   27.60    1.43
   7  -4   1   26.44    1.36
   7  -4   1   27.80    1.36
   7  -4   1   28.10    1.38
   7  -4   1   27.74    1.49
  -8   4  -1   45.96    2.09
  -8   4  -1   45.69    2.11
  -8   4  -1   46.50    2.04
  -8   4  -1   46.34    2.05
   8  -4   1   46.94    2.16
   8  -4   1   47.76    2.06
   8  -4   1   45.12    2.06
   8  -4   1   44.13    2.02
  -9   4  -1   53.43    2.36
  -9   4  -1   56.54    2.40
  -9   4  -1   51.35    2.39
  -9   4  -1   57.11    2.46
   9  -4   1   52.11    2.38
   9  -4   1   51.83    2.35
   9  -4   1   52.56    2.38
   9  -4   1   57.48    2.52
 -10   4  -1    3.88    0.82
 -10   4  -1    2.84    0.73
 -10   4  -1    3.85    0.79
 -10   4  -1    3.16    0.70
  10  -4   1    2.73    0.78
  10  -4   1    3.60    0.76
  10  -4   1    3.61    0.62
  10  -4   1    3.30    0.76
 -11   4  -1    7.58    0.99
 -11   4  -1    3.64    0.86
 -11   4  -1    3.98    0.87
 -11   4  -1    4.60    0.79
  11  -4   1    5.05    0.95
  11  -4   1    4.49    0.91
  11  -4   1    4.44    0.88
  11  -4   1    6.25    0.77
 -12   4  -1    2.22    0.75
 -12   4  -1    1.60    0.68
 -12   4  -1    1.01    0.77
 -12   4  -1    1.91    0.82
  12  -4   1    2.55    0.84
  12  -4   1    1.62    0.75
  12  -4   1    1.33    0.59
  12  -4   1    2.66    0.92
 -13   4  -1   11.39    1.36
 -13   4  -1   10.53    1.34
 -13   4  -1   11.66    1.34
 -13   4  -1   11.86    1.48
  13  -4   1   11.27    1.37
  13  -4   1   11.58    1.36
  13  -4   1   11.85    1.49
 -14   4  -1    5.16    1.01
 -14   4  -1    6.43    1.00
 -14   4  -1    4.13    0.96
 -14   4  -1    5.88    1.21
  14  -4   1    4.91    1.15
  14  -4   1    5.66    1.19
  14  -4   1    3.23    1.07
 -15   4  -1   -0.44    1.20
 -15   4  -1    2.74    0.92
 -15   4  -1   -0.54    0.99
 -15   4  -1    3.69    1.13
  15  -4   1    1.45    1.03
  15  -4   1   -0.44    1.12
  15  -4   1    0.75    1.10
 -16   4  -1   -1.02    1.32
 -16   4  -1   -0.77    1.22
 -16   4  -1    1.57    1.03
  16  -4   1    0.08    1.03
  16  -4   1   -2.30    1.32
  16  -4   1   -1.87    1.26
 -17   4  -1   -1.28    1.39
 -17   4  -1    2.61    1.45
 -17   4  -1    1.81    1.28
  17  -4   1   -1.81    1.57
  17  -4   1   -0.76    1.35
 -18   4  -1    1.87    1.53
 -18   4  -1    1.76    1.78
  18  -4   1   -2.17    1.49
  18  -4   1    0.38    1.87
  20   3  -1   -0.07    2.16
  20   3  -1    0.07    1.76
 -20  -3   1    0.98    1.62
 -20  -3   1    1.54    1.44
 -20  -3   1   -2.03    1.56
 -20  -3   1   -3.49    1.83
  19   3  -1    0.98    1.68
  19   3  -1    2.27    1.82
  19   3  -1    1.04    1.50
  19   3  -1   -0.20    1.54
 -19  -3   1    1.59    1.29
 -19  -3   1    0.66    1.25
 -19  -3   1   -2.12    1.45
 -19  -3   1    0.73    1.36
  18   3  -1    1.30    1.40
  18   3  -1   -0.41    1.27
  18   3  -1   -2.17    1.29
 -18  -3   1    0.18    1.11
 -18  -3   1    1.67    1.01
 -18  -3   1    0.37    1.50
 -18  -3   1    2.99    1.38
  17   3  -1    3.85    1.34
  17   3  -1    1.81    1.18
  17   3  -1    1.31    1.19
  17   3  -1    1.84    1.26
 -17  -3   1    0.88    1.25
 -17  -3   1    2.98    1.02
 -17  -3   1    2.51    1.07
 -17  -3   1    4.11    1.20
  16   3  -1    8.21    1.39
  16   3  -1    4.00    1.07
  16   3  -1    7.50    1.30
  16   3  -1    4.54    1.16
 -16  -3   1    6.36    1.26
 -16  -3   1    4.92    1.15
 -16  -3   1    5.56    0.95
 -16  -3   1    7.84    1.28
  15   3  -1   13.57    1.46
  15   3  -1   13.61    1.66
  15   3  -1   13.47    1.59
  15   3  -1   12.28    1.64
 -15  -3   1   12.26    1.46
 -15  -3   1   12.85    1.58
 -15  -3   1    9.91    1.26
 -15  -3   1   12.12    1.36
  14   3  -1    8.66    1.13
  14   3  -1    6.62    1.09
  14   3  -1    5.95    0.94
  14   3  -1    7.29    1.15
 -14  -3   1    7.91    0.98
 -14  -3   1    6.77    1.00
 -14  -3   1    7.23    1.08
 -14  -3   1    6.82    1.03
  13   3  -1   19.87    1.48
  13   3  -1   20.09    1.55
  13   3  -1   19.14    1.43
  13   3  -1   15.19    1.53
 -13  -3   1   20.20    1.37
 -13  -3   1   20.99    1.47
 -13  -3   1   17.50    1.43
 -13  -3   1   15.76    1.44
  12   3  -1   24.94    1.57
  12   3  -1   25.85    1.57
  12   3  -1   25.26    1.63
  12   3  -1   23.86    1.52
 -12  -3   1   24.86    1.53
 -12  -3   1   24.63    1.51
 -12  -3   1   26.06    1.46
 -12  -3   1   23.45    1.49
  11   3  -1   12.73    1.09
  11   3  -1   13.34    1.08
  11   3  -1   12.04    1.11
  11   3  -1   12.92    1.03
 -11  -3   1   11.78    1.03
 -11  -3   1   11.35    0.92
 -11  -3   1   10.26    0.99
 -11  -3   1   11.31    1.03
  10   3  -1   11.35    0.95
  10   3  -1    9.67    0.98
  10   3  -1   10.53    0.94
  10   3  -1   12.24    0.96
 -10  -3   1   10.29    0.83
 -10  -3   1   10.43    0.93
 -10  -3   1   10.45    0.92
 -10  -3   1   10.73    0.91
   9   3  -1   12.51    0.93
   9   3  -1   11.03    0.90
   9   3  -1   11.64    0.95
   9   3  -1   11.75    0.90
  -9  -3   1   12.15    0.91
  -9  -3   1   10.14    0.88
  -9  -3   1   12.07    0.88
   8   3  -1   49.87    2.07
   8   3  -1   47.67    1.99
   8   3  -1   47.35    1.99
   8   3  -1   49.39    2.01
  -8  -3   1   45.45    1.94
  -8  -3   1   47.31    1.96
  -8  -3   1   48.56    1.99
   7   3  -1   82.25    2.98
   7   3  -1   80.71    3.08
   7   3  -1   82.99    3.00
   7   3  -1   79.78    3.01
  -7  -3   1   79.15    3.00
  -7  -3   1   80.68    2.97
  -7  -3   1   80.14    2.97
   6   3  -1  117.99    4.26
   6   3  -1  115.16    4.15
   6   3  -1  113.03    4.11
   6   3  -1  119.66    4.11
  -6  -3   1  118.41    4.11
  -6  -3   1  122.79    4.13
  -6  -3   1  117.35    4.16
  -6  -3   1  118.28    4.26
   5   3  -1  179.83    6.29
   5   3  -1  183.06    6.44
   5   3  -1  183.37    6.22
   5   3  -1  180.87    6.21
  -5  -3   1  190.91    6.45
  -5  -3   1  185.22    6.29
  -5  -3   1  183.99    6.21
  -5  -3   1  190.99    6.23
   4   3  -1  248.35    8.29
   4   3  -1  249.22    8.60
   4   3  -1  251.40    8.29
   4   3  -1  241.15    8.39
  -4  -3   1  248.99    8.28
  -4  -3   1  257.21    8.30
  -4  -3   1  256.17    8.61
  -4  -3   1  252.27    8.40
   3   3  -1   78.89    2.95
   3   3  -1   81.88    2.84
   3   3  -1   80.79    2.83
   3   3  -1   81.19    2.86
  -3  -3   1   82.53    2.95
  -3  -3   1   86.89    2.85
  -3  -3   1   83.14    2.86
  -3  -3   1   83.47    2.84
   2   3  -1  331.91   11.55
   2   3  -1  353.01   11.40
   2   3  -1  365.50   11.40
   2   3  -1  344.17   11.82
  -2  -3   1  357.62   11.40
  -2  -3   1  352.01   11.83
  -2  -3   1  335.93   11.55
  -2  -3   1  353.25   11.40
   1   3  -1   90.61    3.04
   1   3  -1   85.50    3.15
  -1  -3   1   90.66    3.32
  -1  -3   1   90.20    3.16
  -1  -3   1   93.62    3.04
   0   3  -1   59.95    2.21
   0   3  -1   68.45    2.16
   0   3  -1   57.63    2.32
   0  -3   1   58.09    2.32
   0  -3   1   64.55    2.15
   0  -3   1   63.47    2.22
  -1   3  -1  589.60   20.46
  -1   3  -1  572.30   19.46
  -1   3  -1  593.92   18.90
   1  -3   1  585.32   19.01
   1  -3   1  558.21   20.45
   1  -3   1  574.70   19.46
  -2   3  -1   56.88    2.05
  -2   3  -1   55.20    2.19
   2  -3   1   57.50    2.09
   2  -3   1   59.84    2.06
   2  -3   1   56.52    2.19
  -3   3  -1   95.80    3.23
  -3   3  -1   89.73    3.44
  -3   3  -1   97.36    3.24
   3  -3   1   91.74    3.29
   3  -3   1   92.86    3.23
   3  -3   1   87.90    3.44
  -4   3  -1  140.60    4.81
  -4   3  -1  145.81    4.82
  -4   3  -1  139.03    5.15
   4  -3   1  130.04    5.13
   4  -3   1  143.61    4.81
   4  -3   1  139.15    4.89
   4  -3   1  144.31    4.82
  -5   3  -1   68.86    2.85
  -5   3  -1   74.84    2.78
  -5   3  -1   78.27    2.76
  -5   3  -1   75.17    2.74
   5  -3   1   77.61    2.74
   5  -3   1   66.48    2.83
   5  -3   1   77.11    2.74
   5  -3   1   73.47    2.78
  -6   3  -1  160.14    5.43
  -6   3  -1  155.82    5.76
  -6   3  -1  148.49    5.39
  -6   3  -1  155.95    5.51
   6  -3   1  159.78    5.42
   6  -3   1  149.70    5.74
   6  -3   1  155.02    5.51
   6  -3   1  160.88    5.43
  -7   3  -1   63.35    2.51
  -7   3  -1   62.67    2.56
  -7   3  -1   64.35    2.50
  -7   3  -1   62.47    2.54
   7  -3   1   61.92    2.54
   7  -3   1   63.39    2.50
   7  -3   1   64.27    2.50
   7  -3   1   62.12    2.55
  -8   3  -1   86.90    3.46
  -8   3  -1   92.20    3.42
  -8   3  -1   87.19    3.41
  -8   3  -1   92.86    3.56
   8  -3   1   88.71    3.53
   8  -3   1   93.43    3.52
   8  -3   1   89.13    3.41
   8  -3   1   89.53    3.42
  -9   3  -1  119.51    4.41
  -9   3  -1  119.33    4.45
  -9   3  -1  119.32    4.59
  -9   3  -1  115.72    4.38
   9  -3   1  119.21    4.40
   9  -3   1  116.84    4.56
   9  -3   1  118.94    4.49
   9  -3   1  117.92    4.40
 -10   3  -1   29.64    1.62
 -10   3  -1   27.63    1.61
 -10   3  -1   27.51    1.62
 -10   3  -1   29.43    1.56
  10  -3   1   28.39    1.61
  10  -3   1   27.16    1.66
  10  -3   1   28.52    1.62
  10  -3   1   28.11    1.50
 -11   3  -1   36.79    1.98
 -11   3  -1   38.49    1.98
 -11   3  -1   38.53    2.03
 -11   3  -1   37.17    2.03
  11  -3   1   38.95    2.02
  11  -3   1   40.00    1.89
  11  -3   1   36.30    2.02
  11  -3   1   39.51    2.10
 -12   3  -1   11.30    1.22
 -12   3  -1    9.91    1.16
 -12   3  -1   11.59    1.31
 -12   3  -1   11.33    1.29
  12  -3   1   11.79    1.30
  12  -3   1   10.57    1.35
  12  -3   1   12.00    1.28
 -13   3  -1    1.02    0.75
 -13   3  -1    2.47    0.80
 -13   3  -1    1.94    0.71
 -13   3  -1    3.63    0.95
  13  -3   1    2.04    1.00
  13  -3   1    3.29    0.94
  13  -3   1    3.02    0.94
 -14   3  -1    3.29    0.87
 -14   3  -1    6.10    1.10
 -14   3  -1    5.54    0.99
 -14   3  -1    4.75    1.10
  14  -3   1    4.40    1.18
  14  -3   1    5.77    1.20
  14  -3   1    5.64    1.11
 -15   3  -1   -0.23    1.01
 -15   3  -1    1.59    0.90
 -15   3  -1    0.41    0.94
 -15   3  -1    0.52    0.83
  15  -3   1    1.46    1.02
  15  -3   1    0.70    1.10
  15  -3   1   -0.12    1.05
 -16   3  -1    2.65    1.11
 -16   3  -1    0.16    1.19
 -16   3  -1    1.14    0.96
 -16   3  -1   -0.30    1.29
  16  -3   1    1.29    1.17
  16  -3   1    1.27    1.33
  16  -3   1   -0.10    1.07
 -17   3  -1    1.33    1.47
 -17   3  -1    2.48    1.48
 -17   3  -1    0.06    1.09
 -17   3  -1    0.92    1.23
  17  -3   1   -1.02    1.28
  17  -3   1    1.53    1.41
  17  -3   1    0.51    1.38
 -18   3  -1    1.61    1.49
 -18   3  -1    0.45    1.55
 -18   3  -1   -0.35    1.20
 -18   3  -1   -1.17    1.60
  18  -3   1    2.58    1.85
  18  -3   1   -2.81    1.63
  18  -3   1   -0.19    1.33
 -19   3  -1    1.21    1.54
 -19   3  -1    0.49    1.90
  19  -3   1   -1.38    1.61
  19  -3   1   -3.61    2.07
  20   2  -1    2.85    2.15
  20   2  -1   -1.10    1.78
 -20  -2   1   -3.02    1.48
 -20  -2   1   -1.07    1.44
  19   2  -1    1.42    1.72
  19   2  -1    2.35    1.53
  19   2  -1    2.67    1.82
 -19  -2   1   -2.29    1.35
 -19  -2   1   -3.29    1.32
 -19  -2   1    1.86    1.25
 -19  -2   1    0.24    1.74
  18   2  -1   -0.98    1.44
  18   2  -1    0.89    1.36
  18   2  -1    1.97    1.48
  18   2  -1   -0.67    1.45
 -18  -2   1   -0.77    1.39
 -18  -2   1    0.10    1.45
 -18  -2   1   -0.76    1.27
 -18  -2   1    1.03    1.07
  17   2  -1    3.20    1.25
  17   2  -1    2.16    1.28
  17   2  -1    0.57    1.29
 -17  -2   1    0.03    1.27
 -17  -2   1    0.34    0.92
 -17  -2   1    3.57    1.13
 -17  -2   1    1.79    1.14
  16   2  -1   -0.44    1.01
  16   2  -1    1.63    0.91
  16   2  -1    2.87    1.14
  16   2  -1    0.94    1.12
 -16  -2   1   -2.28    0.96
 -16  -2   1    0.50    0.83
 -16  -2   1    1.88    0.93
 -16  -2   1    2.05    1.00
  15   2  -1    9.49    1.24
  15   2  -1    9.46    1.29
  15   2  -1   11.35    1.44
  15   2  -1    9.49    1.32
 -15  -2   1    9.42    1.31
 -15  -2   1   12.85    1.53
 -15  -2   1   10.02    1.35
 -15  -2   1    8.36    1.18
  14   2  -1   10.58    1.30
  14   2  -1   10.54    1.32
  14   2  -1   13.38    1.50
  14   2  -1   13.71    1.52
 -14  -2   1   13.76    1.45
 -14  -2   1   11.59    1.36
 -14  -2   1   13.08    1.41
 -14  -2   1   12.73    1.27
  13   2  -1    5.85    0.94
  13   2  -1    7.46    1.02
  13   2  -1    4.64    0.89
  13   2  -1    6.96    0.98
 -13  -2   1    6.69    1.02
 -13  -2   1    6.89    1.04
 -13  -2   1    7.13    0.94
 -13  -2   1    6.02    0.85
  12   2  -1    9.83    1.07
  12   2  -1    5.33    0.96
  12   2  -1    7.51    0.99
  12   2  -1    8.22    1.03
 -12  -2   1    7.30    0.98
 -12  -2   1    7.00    0.94
 -12  -2   1    6.85    0.89
 -12  -2   1    8.54    1.05
  11   2  -1    2.74    0.68
  11   2  -1    3.57    0.73
  11   2  -1    2.30    0.65
  11   2  -1    2.35    0.64
 -11  -2   1    2.54    0.60
 -11  -2   1    2.65    0.61
 -11  -2   1    2.66    0.51
 -11  -2   1    3.05    0.66
  10   2  -1   13.14    1.01
  10   2  -1   12.48    1.05
  10   2  -1   11.35    1.04
  10   2  -1   13.75    1.03
 -10  -2   1   13.21    1.02
 -10  -2   1   13.12    1.00
 -10  -2   1   11.82    0.96
 -10  -2   1   14.10    0.90
   9   2  -1   43.23    1.98
   9   2  -1   45.89    1.98
   9   2  -1   43.85    1.95
   9   2  -1   45.15    2.00
  -9  -2   1   45.41    1.95
  -9  -2   1   46.34    1.98
  -9  -2   1   45.27    1.96
  -9  -2   1   46.03    1.99
   8   2  -1   63.78    2.60
   8   2  -1   66.47    2.57
   8   2  -1   65.07    2.53
   8   2  -1   61.51    2.52
  -8  -2   1   67.09    2.55
  -8  -2   1   63.10    2.51
  -8  -2   1   63.56    2.59
  -8  -2   1   67.30    2.54
   7   2  -1  236.12    8.18
   7   2  -1  244.19    8.10
   7   2  -1  243.40    8.08
   7   2  -1  233.08    8.35
  -7  -2   1  233.61    8.18
  -7  -2   1  247.49    8.10
  -7  -2   1  237.66    8.08
   6   2  -1  340.35   11.79
   6   2  -1  356.40   11.66
   6   2  -1  350.73   12.06
   6   2  -1  357.08   11.64
  -6  -2   1  352.96   11.65
  -6  -2   1  355.27   11.64
  -6  -2   1  349.45   11.80
   5   2  -1  163.50    5.59
   5   2  -1  158.85    5.65
   5   2  -1  172.13    5.61
   5   2  -1  164.22    5.79
  -5  -2   1  163.65    5.66
  -5  -2   1  164.82    5.59
  -5  -2   1  170.79    5.60
   4   2  -1  163.34    5.47
   4   2  -1  157.40    5.53
   4   2  -1  157.33    5.67
   4   2  -1  159.04    5.47
  -4  -2   1  165.93    5.67
  -4  -2   1  168.18    5.48
  -4  -2   1  167.14    5.48
  -4  -2   1  167.23    5.54
   3   2  -1  770.74   25.55
   3   2  -1  765.06   26.58
   3   2  -1  748.39   25.36
   3   2  -1  750.18   25.95
  -3  -2   1  784.14   26.58
  -3  -2   1  803.18   25.63
  -3  -2   1  777.50   26.02
  -3  -2   1  863.32   25.79
   2   2  -1   17.69    0.74
   2   2  -1   17.40    0.73
   2   2  -1   15.76    0.73
  -2  -2   1   18.98    0.75
  -2  -2   1   19.78    0.79
  -2  -2   1   20.27    0.75
  -2  -2   1   20.05    0.76
   1   2  -1   80.81    2.68
   1   2  -1   76.88    2.78
  -1  -2   1   83.07    2.68
  -1  -2   1   78.72    2.78
  -1  -2   1   79.13    2.68
   0   2  -1  200.51    6.91
   0   2  -1  212.96    6.67
   0   2  -1  202.69    7.26
   0  -2   1  208.42    6.68
   0  -2   1  211.01    6.91
   0  -2   1  187.63    7.27
  -1   2  -1  172.85    5.82
  -1   2  -1  181.63    5.65
  -1   2  -1  171.25    6.13
   1  -2   1  174.93    5.82
   1  -2   1  168.55    5.64
   1  -2   1  157.84    6.12
  -2   2  -1  125.68    4.72
  -2   2  -1  137.10    4.38
  -2   2  -1  134.78    4.38
   2  -2   1  130.04    4.37
   2  -2   1  131.25    4.45
   2  -2   1  123.87    4.72
  -3   2  -1   55.29    2.00
  -3   2  -1   53.03    2.12
  -3   2  -1   56.43    2.04
  -3   2  -1   53.12    1.99
   3  -2   1   57.31    2.00
   3  -2   1   52.85    2.11
   3  -2   1   54.97    2.03
   3  -2   1   60.42    2.02
  -4   2  -1   77.93    2.94
  -4   2  -1   74.11    2.75
  -4   2  -1   75.68    2.77
  -4   2  -1   76.93    2.81
   4  -2   1   80.15    2.77
   4  -2   1   80.93    2.94
   4  -2   1   80.09    2.82
   4  -2   1   76.78    2.76
  -5   2  -1   52.34    1.98
  -5   2  -1   52.79    1.99
  -5   2  -1   49.70    2.05
  -5   2  -1   51.91    2.01
   5  -2   1   52.76    1.99
   5  -2   1   53.66    1.98
   5  -2   1   50.92    2.02
   5  -2   1   48.08    2.03
  -6   2  -1   34.47    1.48
  -6   2  -1   34.18    1.50
  -6   2  -1   34.51    1.50
  -6   2  -1   34.85    1.50
   6  -2   1   33.61    1.49
   6  -2   1   33.74    1.52
   6  -2   1   33.69    1.48
   6  -2   1   33.25    1.47
  -7   2  -1   27.65    1.38
  -7   2  -1   30.60    1.37
  -7   2  -1   29.51    1.40
  -7   2  -1   28.63    1.38
   7  -2   1   28.09    1.37
   7  -2   1   29.72    1.39
   7  -2   1   29.16    1.42
   7  -2   1   28.21    1.33
  -8   2  -1   35.41    1.62
  -8   2  -1   33.26    1.63
  -8   2  -1   36.43    1.63
  -8   2  -1   33.15    1.62
   8  -2   1   35.72    1.60
   8  -2   1   38.03    1.64
   8  -2   1   34.72    1.62
   8  -2   1   34.38    1.70
  -9   2  -1  128.17    4.79
  -9   2  -1  131.64    5.04
  -9   2  -1  133.61    4.87
  -9   2  -1  135.67    4.80
   9  -2   1  134.74    4.90
   9  -2   1  135.40    4.80
   9  -2   1  130.12    5.01
   9  -2   1  126.95    4.78
 -10   2  -1   43.12    2.07
 -10   2  -1   43.72    2.06
 -10   2  -1   43.11    2.05
 -10   2  -1   47.54    2.09
  10  -2   1   47.18    2.09
  10  -2   1   43.61    2.12
  10  -2   1   45.64    2.10
  10  -2   1   44.15    2.03
 -11   2  -1   80.83    3.26
 -11   2  -1   74.52    3.20
 -11   2  -1   77.88    3.19
 -11   2  -1   76.01    3.20
  11  -2   1   72.71    3.17
  11  -2   1   77.21    3.19
  11  -2   1   79.87    3.29
 -12   2  -1   52.62    2.59
 -12   2  -1   60.61    2.59
 -12   2  -1   51.09    2.54
 -12   2  -1   54.85    2.60
  12  -2   1   57.52    2.60
  12  -2   1   55.37    2.67
  12  -2   1   52.67    2.59
 -13   2  -1    8.22    1.12
 -13   2  -1    4.64    0.87
 -13   2  -1    6.31    0.96
 -13   2  -1    8.81    1.15
  13  -2   1    5.49    0.91
  13  -2   1    4.68    0.92
  13  -2   1    7.18    1.10
 -14   2  -1    3.30    0.86
 -14   2  -1    2.82    0.87
 -14   2  -1    2.24    0.91
 -14   2  -1    3.64    0.94
  14  -2   1    2.52    0.93
  14  -2   1    2.07    0.86
  14  -2   1    2.00    0.93
 -15   2  -1    4.47    1.18
 -15   2  -1    6.18    1.04
 -15   2  -1    4.18    1.02
 -15   2  -1    6.11    1.09
  15  -2   1    5.76    1.18
  15  -2   1    3.54    1.16
  15  -2   1    6.88    1.22
 -16   2  -1    0.42    1.16
 -16   2  -1    1.65    1.24
 -16   2  -1    0.56    0.98
 -16   2  -1    0.52    0.96
  16  -2   1    1.93    1.15
  16  -2   1    0.59    1.15
  16  -2   1    2.18    1.14
  16  -2   1    0.78    1.14
 -17   2  -1    1.62    1.07
 -17   2  -1    0.64    1.35
 -17   2  -1    2.88    1.40
 -17   2  -1    3.36    1.33
  17  -2   1    2.14    1.25
  17  -2   1   -1.29    1.44
  17  -2   1    3.71    1.50
  17  -2   1    2.96    1.41
 -18   2  -1    2.60    1.54
 -18   2  -1    1.47    1.30
 -18   2  -1    0.10    1.43
 -18   2  -1    0.78    1.26
  18  -2   1   -2.29    1.49
  18  -2   1   -2.80    1.27
  18  -2   1    0.82    1.58
 -19   2  -1    1.94    1.47
 -19   2  -1   -2.05    1.61
 -19   2  -1    1.90    1.50
  19  -2   1   -0.96    1.94
  19  -2   1   -0.44    1.69
  20   1  -1    0.17    1.99
 -20  -1   1   -0.08    1.56
 -20  -1   1   -1.17    1.81
 -20  -1   1   -0.54    1.51
  19   1  -1   -1.14    1.93
  19   1  -1    2.36    1.64
 -19  -1   1    0.26    1.63
 -19  -1   1    4.17    1.48
 -19  -1   1    5.09    1.89
 -19  -1   1    0.60    1.23
  18   1  -1    1.28    1.66
  18   1  -1    7.74    1.76
  18   1  -1    2.20    1.54
  18   1  -1    2.37    1.38
 -18  -1   1    2.34    1.51
 -18  -1   1    1.95    1.14
 -18  -1   1   -1.86    1.30
 -18  -1   1    1.70    1.29
  17   1  -1    3.72    1.36
  17   1  -1    4.15    1.26
  17   1  -1    2.16    1.34
 -17  -1   1    3.87    1.04
 -17  -1   1    2.30    1.40
 -17  -1   1    1.38    1.27
 -17  -1   1    3.29    1.28
  16   1  -1    1.92    1.05
  16   1  -1    2.66    1.26
  16   1  -1    2.63    1.23
  16   1  -1    1.93    1.22
 -16  -1   1    2.75    1.15
 -16  -1   1    1.95    1.08
 -16  -1   1    2.64    1.17
 -16  -1   1    2.38    0.90
  15   1  -1    9.30    1.32
  15   1  -1    8.85    1.36
  15   1  -1    8.23    1.28
  15   1  -1    9.22    1.44
 -15  -1   1    7.77    1.27
 -15  -1   1    9.47    1.32
 -15  -1   1    5.80    1.19
 -15  -1   1    9.79    1.30
  14   1  -1    7.59    1.22
  14   1  -1    6.60    1.14
  14   1  -1    6.33    1.02
  14   1  -1    5.06    0.97
 -14  -1   1    5.92    1.07
 -14  -1   1    7.09    0.98
 -14  -1   1    5.58    1.00
 -14  -1   1    6.09    0.97
  13   1  -1    1.84    0.75
  13   1  -1    1.94    0.78
  13   1  -1    1.02    0.78
  13   1  -1    1.41    0.71
 -13  -1   1    0.72    0.69
 -13  -1   1    2.36    0.65
 -13  -1   1    1.03    0.70
 -13  -1   1    0.77    0.74
  12   1  -1    0.70    0.65
  12   1  -1    0.82    0.66
  12   1  -1    0.07    0.65
  12   1  -1    0.39    0.61
 -12  -1   1    0.43    0.63
 -12  -1   1    0.99    0.72
 -12  -1   1   -0.27    0.68
 -12  -1   1    1.24    0.51
  11   1  -1    9.67    1.13
  11   1  -1   14.14    1.20
  11   1  -1   11.72    1.12
  11   1  -1   12.83    1.14
 -11  -1   1   12.62    1.15
 -11  -1   1   11.36    0.97
 -11  -1   1   11.13    1.13
 -11  -1   1   12.27    1.09
  10   1  -1    2.50    0.59
  10   1  -1    2.93    0.62
  10   1  -1    2.43    0.58
  10   1  -1    2.74    0.60
 -10  -1   1    2.33    0.46
 -10  -1   1    2.90    0.62
 -10  -1   1    2.97    0.62
 -10  -1   1    1.57    0.56
   9   1  -1   40.83    1.88
   9   1  -1   41.85    1.91
   9   1  -1   40.61    1.86
   9   1  -1   42.60    1.87
  -9  -1   1   40.61    1.82
  -9  -1   1   40.58    1.85
  -9  -1   1   42.91    1.88
  -9  -1   1   41.37    1.85
   8   1  -1   67.00    2.65
   8   1  -1   64.76    2.59
   8   1  -1   69.78    2.61
   8   1  -1   66.72    2.57
  -8  -1   1   65.87    2.59
  -8  -1   1   61.88    2.54
  -8  -1   1   63.62    2.61
  -8  -1   1   63.99    2.57
   7   1  -1   84.13    3.28
   7   1  -1   82.35    3.16
   7   1  -1   85.95    3.19
   7   1  -1   86.00    3.23
  -7  -1   1   86.82    3.17
  -7  -1   1   93.07    3.22
  -7  -1   1   86.81    3.21
  -7  -1   1   87.12    3.31
   6   1  -1  363.54   12.47
   6   1  -1  372.38   12.05
   6   1  -1  374.85   12.06
   6   1  -1  358.60   12.21
  -6  -1   1  358.79   12.05
  -6  -1   1  354.73   12.98
  -6  -1   1  365.10   12.04
  -6  -1   1  363.75   12.21
   5   1  -1  119.11    4.02
   5   1  -1  115.72    4.14
   5   1  -1  115.37    4.01
   5   1  -1  111.56    4.05
  -5  -1   1  118.28    4.02
  -5  -1   1  114.25    4.00
  -5  -1   1  117.06    4.05
   4   1  -1   34.49    1.39
   4   1  -1   34.33    1.39
   4   1  -1   35.30    1.44
   4   1  -1   36.35    1.41
  -4  -1   1   37.28    1.40
  -4  -1   1   39.89    1.42
   3   1  -1  109.82    3.93
   3   1  -1  113.33    4.03
   3   1  -1  114.80    3.90
   3   1  -1  119.87    3.90
  -3  -1   1  117.72    3.90
  -3  -1   1  118.39    3.94
  -3  -1   1  110.77    3.88
   2   1  -1    9.57    0.40
   2   1  -1    8.50    0.41
   2   1  -1    8.16    0.38
   2   1  -1    8.81    0.39
  -2  -1   1    7.00    0.37
  -2  -1   1    6.74    0.36
  -2  -1   1    7.22    0.39
  -2   1  -1    8.58    0.39
  -2   1  -1    7.36    0.38
  -2   1  -1    8.59    0.38
   2  -1   1    6.93    0.36
   2  -1   1    7.04    0.36
   2  -1   1    6.47    0.37
  -3   1  -1  742.81   27.47
  -3   1  -1  774.74   25.84
  -3   1  -1  764.67   25.42
  -3   1  -1  787.47   25.35
   3  -1   1  763.46   25.58
   3  -1   1  742.41   27.39
   3  -1   1  816.73   25.41
   3  -1   1  805.05   25.39
  -4   1  -1  251.50    8.93
  -4   1  -1  249.38    8.39
  -4   1  -1  244.47    8.25
  -4   1  -1  242.99    8.25
   4  -1   1  248.32    8.39
   4  -1   1  247.80    8.93
   4  -1   1  257.87    8.26
   4  -1   1  254.08    8.27
  -5   1  -1  286.48    9.62
  -5   1  -1  291.45   10.23
  -5   1  -1  288.48    9.47
  -5   1  -1  289.54    9.46
   5  -1   1  275.33   10.21
   5  -1   1  285.63    9.47
   5  -1   1  286.28    9.62
   5  -1   1  280.41    9.46
  -6   1  -1   84.91    3.23
  -6   1  -1   86.32    3.07
  -6   1  -1   85.61    3.05
  -6   1  -1   85.48    3.11
   6  -1   1   82.96    3.11
   6  -1   1   81.56    3.21
   6  -1   1   83.39    3.06
   6  -1   1   85.30    3.05
  -7   1  -1    9.50    0.76
  -7   1  -1   10.63    0.72
  -7   1  -1   10.62    0.76
  -7   1  -1   11.02    0.79
   7  -1   1   11.26    0.79
   7  -1   1   10.94    0.70
   7  -1   1   11.14    0.82
   7  -1   1   10.76    0.77
  -8   1  -1   52.95    2.22
  -8   1  -1   51.51    2.20
  -8   1  -1   50.58    2.15
  -8   1  -1   52.50    2.17
   8  -1   1   54.00    2.23
   8  -1   1   55.07    2.18
   8  -1   1   54.40    2.19
   8  -1   1   53.84    2.20
  -9   1  -1   81.75    3.21
  -9   1  -1   82.02    3.16
  -9   1  -1   79.89    3.11
  -9   1  -1   79.18    3.09
   9  -1   1   81.48    3.18
   9  -1   1   79.76    3.20
   9  -1   1   79.10    3.08
   9  -1   1   79.37    3.11
 -10   1  -1   11.10    0.86
 -10   1  -1   10.40    0.92
 -10   1  -1    9.12    0.93
 -10   1  -1    9.91    0.96
  10  -1   1    7.94    0.91
  10  -1   1    7.97    0.84
  10  -1   1    9.22    0.95
 -11   1  -1   26.53    1.45
 -11   1  -1   25.52    1.48
 -11   1  -1   22.64    1.46
 -11   1  -1   26.67    1.55
  11  -1   1   24.58    1.50
  11  -1   1   22.63    1.50
  11  -1   1   25.52    1.56
 -12   1  -1   47.13    2.17
 -12   1  -1   48.14    2.30
 -12   1  -1   38.80    2.08
 -12   1  -1   43.55    2.21
  12  -1   1   46.92    2.31
  12  -1   1   44.30    2.20
  12  -1   1   40.00    2.17
 -13   1  -1   10.78    1.15
 -13   1  -1    7.89    1.08
 -13   1  -1    8.30    1.06
 -13   1  -1    9.37    1.12
  13  -1   1   10.23    1.25
  13  -1   1    9.05    1.15
  13  -1   1   12.09    1.36
 -14   1  -1    8.81    1.16
 -14   1  -1    7.66    1.15
 -14   1  -1   11.85    1.30
 -14   1  -1   10.22    1.31
  14  -1   1    8.87    1.21
  14  -1   1   10.24    1.29
  14  -1   1    7.61    1.12
  14  -1   1    8.42    1.19
 -15   1  -1   14.54    1.47
 -15   1  -1   11.96    1.46
 -15   1  -1   10.11    1.32
 -15   1  -1    8.82    1.27
  15  -1   1   12.89    1.65
  15  -1   1   10.58    1.38
  15  -1   1   13.36    1.65
  15  -1   1   12.83    1.57
 -16   1  -1    3.78    0.93
 -16   1  -1    2.10    1.07
 -16   1  -1    2.38    0.98
 -16   1  -1    2.33    1.15
  16  -1   1    4.25    1.17
  16  -1   1    1.58    1.12
  16  -1   1    3.39    1.19
  16  -1   1    1.93    1.11
 -17   1  -1    2.19    1.29
 -17   1  -1    1.08    1.04
 -17   1  -1    1.87    1.16
 -17   1  -1    1.89    1.28
  17  -1   1    2.77    1.35
  17  -1   1   -0.27    1.27
  17  -1   1    0.86    1.26
  17  -1   1   -2.19    1.26
 -18   1  -1   -0.74    1.42
 -18   1  -1    0.96    1.18
 -18   1  -1    0.47    1.17
 -18   1  -1    0.79    1.48
  18  -1   1   -0.76    1.46
  18  -1   1   -0.23    1.28
  18  -1   1    1.46    1.48
 -19   1  -1    3.47    1.50
 -19   1  -1    2.97    1.59
 -19   1  -1    4.28    1.39
 -19   1  -1    1.20    1.78
  19  -1   1    2.91    1.69
  19  -1   1    0.58    1.77
 -20   1  -1    1.28    1.88
 -20   1  -1    2.09    1.60
 -20   1  -1    2.18    1.58
  20  -1   1    1.21    1.86
  20  -1   1    0.74    2.20
  19   0  -1   -0.66    2.02
  19   0  -1    3.05    1.80
 -19   0   1    0.50    1.37
 -19   0   1   -2.16    1.63
 -19   0   1    4.38    1.57
  18   0  -1   -3.47    1.51
  18   0  -1    0.00    1.60
  18   0  -1    2.03    1.76
  18   0  -1    0.74    1.49
 -18   0   1    0.71    1.64
 -18   0   1    0.83    1.23
 -18   0   1    0.33    1.45
 -18   0   1   -0.66    1.29
  17   0  -1    3.30    1.49
  17   0  -1    1.83    1.38
  17   0  -1    3.38    1.50
 -17   0   1    2.51    1.04
 -17   0   1   -0.70    1.29
 -17   0   1    0.42    1.26
 -17   0   1    2.32    1.18
  16   0  -1    0.92    1.11
  16   0  -1    0.42    1.23
  16   0  -1    1.51    1.12
  16   0  -1    0.95    1.13
 -16   0   1    0.23    0.91
 -16   0   1    0.88    1.10
 -16   0   1   -0.11    1.07
 -16   0   1    0.97    0.91
  15   0  -1    3.07    1.18
  15   0  -1    4.33    1.12
  15   0  -1    2.52    1.16
  15   0  -1    2.96    1.08
 -15   0   1    3.84    1.01
 -15   0   1    2.55    1.00
 -15   0   1    2.52    1.06
 -15   0   1    5.02    0.95
  14   0  -1    5.74    1.13
  14   0  -1    4.79    0.99
  14   0  -1    5.97    1.12
  14   0  -1    2.99    0.98
 -14   0   1    5.93    0.94
 -14   0   1    6.61    1.10
 -14   0   1    4.40    0.94
 -14   0   1    5.84    1.12
  13   0  -1    9.21    1.16
  13   0  -1   10.26    1.19
  13   0  -1    9.11    1.14
  13   0  -1   12.17    1.38
 -13   0   1    9.95    1.19
 -13   0   1   11.55    1.31
 -13   0   1   10.34    1.14
 -13   0   1   10.26    1.23
  12   0  -1   23.17    1.64
  12   0  -1   23.79    1.62
  12   0  -1   20.12    1.59
  12   0  -1   19.58    1.53
 -12   0   1   21.87    1.56
 -12   0   1   22.12    1.45
 -12   0   1   21.28    1.57
 -12   0   1   24.21    1.41
  11   0  -1   23.31    1.49
  11   0  -1   20.85    1.45
  11   0  -1   20.82    1.50
  11   0  -1   24.06    1.50
 -11   0   1   24.02    1.34
 -11   0   1   20.54    1.42
 -11   0   1   19.74    1.45
 -11   0   1   23.54    1.46
  10   0  -1    9.98    0.95
  10   0  -1    9.21    0.96
  10   0  -1    7.94    0.90
 -10   0   1    6.89    0.77
 -10   0   1    7.39    0.94
 -10   0   1    6.73    0.84
 -10   0   1    9.00    0.91
   9   0  -1   49.29    2.12
   9   0  -1   48.67    2.10
   9   0  -1   46.65    2.07
  -9   0   1   46.50    2.06
  -9   0   1   47.09    2.10
  -9   0   1   48.93    2.06
  -9   0   1   47.16    2.09
   8   0  -1  145.62    5.18
   8   0  -1  147.85    5.25
   8   0  -1  152.90    5.19
  -8   0   1  142.55    5.17
  -8   0   1  143.09    5.23
  -8   0   1  150.79    5.20
  -8   0   1  141.71    5.43
   7   0  -1   24.18    1.23
   7   0  -1   25.12    1.25
   7   0  -1   23.12    1.20
  -7   0   1   24.96    1.16
  -7   0   1   22.01    1.20
  -7   0   1   25.00    1.21
  -7   0   1   23.45    1.21
   6   0  -1  264.90    8.74
   6   0  -1  265.72    8.73
   6   0  -1  258.38    8.84
  -6   0   1  256.02    8.83
  -6   0   1  263.43    8.73
  -6   0   1  252.97    9.34
  -6   0   1  259.65    8.72
   5   0  -1  157.25    5.15
   5   0  -1  151.17    5.21
   5   0  -1  148.20    5.14
  -5   0   1  148.29    5.14
  -5   0   1  147.75    5.20
  -5   0   1  140.39    5.46
  -5   0   1  161.59    5.17
   4   0  -1   18.41    0.83
   4   0  -1   17.17    0.81
   4   0  -1   16.75    0.81
  -4   0   1   18.27    0.82
  -4   0   1   15.32    0.76
  -4   0   1   18.09    0.82
  -4   0   1   18.95    0.84
   3   0  -1  123.83    4.30
   3   0  -1  125.75    4.31
   3   0  -1  121.84    4.35
  -3   0   1  130.51    4.31
  -3   0   1  130.20    4.36
  -3   0   1  133.73    4.32
   2   0  -1  209.43    6.83
   2   0  -1  211.12    6.82
   2   0  -1  203.57    6.91
  -2   0   1  214.45    6.83
  -2   0   1  203.07    6.91
  -2   0   1  204.88    6.82
  -2   0  -1   34.81    1.23
  -2   0  -1   37.37    1.22
  -2   0  -1   33.04    1.31
   2   0   1   33.55    1.21
  -3   0  -1   34.64    1.24
  -3   0  -1   34.04    1.26
  -3   0  -1   33.88    1.32
  -3   0  -1   36.42    1.25
   3   0   1   32.50    1.32
   3   0   1   33.82    1.24
   3   0   1   32.62    1.24
  -4   0  -1  180.61    6.71
  -4   0  -1  199.76    6.22
  -4   0  -1  193.16    6.31
  -4   0  -1  202.68    6.23
   4   0   1  166.28    6.69
   4   0   1  185.94    6.20
   4   0   1  185.76    6.21
   4   0   1  180.83    6.30
  -5   0  -1  149.54    5.29
  -5   0  -1  152.11    4.99
  -5   0  -1  149.85    4.92
  -5   0  -1  149.72    4.91
   5   0   1  136.43    4.90
   5   0   1  135.27    5.26
   5   0   1  140.03    4.98
   5   0   1  145.01    4.90
  -6   0  -1   97.90    3.22
  -6   0  -1   92.15    3.26
  -6   0  -1  101.74    3.25
  -6   0  -1   85.54    3.39
   6   0   1   90.45    3.20
   6   0   1   76.57    3.37
   6   0   1   90.86    3.22
   6   0   1   86.75    3.26
  -7   0  -1   50.45    1.93
  -7   0  -1   47.63    1.95
  -7   0  -1   48.92    1.91
  -7   0  -1   44.80    1.96
   7   0   1   47.28    1.95
   7   0   1   50.57    1.94
   7   0   1   50.99    1.92
   7   0   1   43.01    1.94
  -8   0  -1   38.83    1.72
  -8   0  -1   39.33    1.74
  -8   0  -1   39.16    1.70
  -8   0  -1   38.70    1.73
   8   0   1   39.51    1.76
   8   0   1   41.37    1.72
   8   0   1   40.40    1.72
  -9   0  -1  135.64    4.94
  -9   0  -1  136.47    4.86
  -9   0  -1  132.82    5.14
  -9   0  -1  131.07    4.84
   9   0   1  140.43    4.87
   9   0   1  138.99    4.95
   9   0   1  136.45    4.87
 -10   0  -1   30.33    1.50
 -10   0  -1   29.89    1.53
 -10   0  -1   28.40    1.52
 -10   0  -1   29.43    1.53
  10   0   1   31.04    1.59
  10   0   1   28.74    1.52
  10   0   1   30.96    1.56
 -11   0  -1   14.51    1.06
 -11   0  -1   15.33    1.16
 -11   0  -1   16.53    1.20
 -11   0  -1   16.14    1.11
  11   0   1   15.18    1.20
  11   0   1   15.96    1.18
  11   0   1   14.98    1.17
 -12   0  -1    4.13    0.78
 -12   0  -1    6.68    0.81
 -12   0  -1    6.22    0.95
 -12   0  -1    5.19    0.85
  12   0   1    6.16    0.89
  12   0   1    6.50    0.98
  12   0   1    4.29    0.78
  12   0   1    4.74    0.83
 -13   0  -1    4.59    0.83
 -13   0  -1    4.15    0.75
 -13   0  -1    3.25    0.83
 -13   0  -1    5.03    0.87
  13   0   1    3.56    0.83
  13   0   1    4.80    0.87
  13   0   1    4.00    0.92
  13   0   1    2.94    0.88
 -14   0  -1    9.22    1.15
 -14   0  -1    8.85    1.15
 -14   0  -1    7.19    1.02
 -14   0  -1   10.48    1.25
  14   0   1    6.79    1.04
  14   0   1    6.70    1.09
  14   0   1    8.15    1.11
  14   0   1    7.73    1.09
 -15   0  -1   14.69    1.52
 -15   0  -1   12.77    1.54
 -15   0  -1   12.52    1.55
 -15   0  -1   14.85    1.49
  15   0   1   17.11    1.60
  15   0   1   13.31    1.58
  15   0   1   14.27    1.67
  15   0   1   17.78    1.63
 -16   0  -1    2.88    0.93
 -16   0  -1    2.90    1.05
 -16   0  -1    3.21    1.07
 -16   0  -1    2.06    0.99
  16   0   1    1.31    1.07
  16   0   1    2.30    1.01
  16   0   1    3.98    1.13
  16   0   1    2.52    1.11
 -17   0  -1    4.80    1.09
 -17   0  -1    2.81    1.28
 -17   0  -1    0.34    1.02
 -17   0  -1    3.26    1.28
  17   0   1    3.68    1.22
  17   0   1    3.84    1.27
  17   0   1    1.75    1.26
  17   0   1    4.64    1.38
 -18   0  -1    1.07    1.37
 -18   0  -1    1.80    1.27
 -18   0  -1    3.63    1.27
 -18   0  -1   -0.51    1.44
  18   0   1    4.71    1.43
  18   0   1    1.26    1.38
  18   0   1    4.76    1.34
 -19   0  -1   -0.01    1.50
 -19   0  -1   -0.89    1.28
 -19   0  -1    1.18    1.27
 -19   0  -1    2.29    1.58
  19   0   1    2.86    1.57
  19   0   1   -0.63    1.74
  19   0   1    3.92    1.62
 -20   0  -1    3.91    1.82
 -20   0  -1    3.25    1.52
 -20   0  -1    2.43    1.57
  20   0   1    5.27    1.88
  20   0   1    1.22    2.18
  19  -1  -1    4.35    1.83
  19  -1  -1    2.01    2.16
 -19   1   1    1.04    1.45
 -19   1   1    2.88    1.63
 -19   1   1    4.47    1.89
  18  -1  -1   -1.70    1.72
  18  -1  -1    1.45    1.78
  18  -1  -1    5.71    1.68
 -18   1   1    0.25    1.27
 -18   1   1    1.88    1.40
 -18   1   1    2.12    1.69
 -18   1   1   -1.69    1.58
  17  -1  -1   -0.37    1.40
  17  -1  -1    0.97    1.42
  17  -1  -1    0.01    1.26
  17  -1  -1    4.10    1.62
 -17   1   1   -1.61    1.37
 -17   1   1   -0.41    1.34
 -17   1   1   -0.10    1.10
 -17   1   1    1.15    1.05
  16  -1  -1   -0.10    1.16
  16  -1  -1    1.48    1.10
  16  -1  -1   -0.28    1.24
 -16   1   1    0.95    1.07
 -16   1   1   -1.62    1.20
 -16   1   1   -0.41    0.89
 -16   1   1   -0.82    1.15
  15  -1  -1    6.70    1.21
  15  -1  -1    3.78    1.20
  15  -1  -1    5.99    1.27
  15  -1  -1    7.14    1.29
 -15   1   1    3.54    1.14
 -15   1   1    6.64    1.07
 -15   1   1    4.64    1.19
 -15   1   1    4.78    1.10
  14  -1  -1   15.43    1.74
  14  -1  -1    8.50    1.17
  14  -1  -1   14.81    1.69
  14  -1  -1   10.82    1.35
 -14   1   1   11.20    1.40
 -14   1   1   11.19    1.34
 -14   1   1   11.51    1.46
 -14   1   1   12.13    1.52
  13  -1  -1   15.76    1.51
  13  -1  -1   11.26    1.39
  13  -1  -1   11.12    1.28
  13  -1  -1   13.19    1.47
 -13   1   1   11.85    1.27
 -13   1   1   11.36    1.31
 -13   1   1   11.42    1.40
 -13   1   1   11.83    1.22
  12  -1  -1   22.07    1.63
  12  -1  -1   22.76    1.60
  12  -1  -1   19.72    1.60
 -12   1   1   25.37    1.47
 -12   1   1   25.69    1.67
 -12   1   1   23.05    1.64
 -12   1   1   23.20    1.58
  11  -1  -1   33.46    1.91
  11  -1  -1   36.96    1.93
  11  -1  -1   32.54    1.87
 -11   1   1   29.98    1.84
 -11   1   1   39.97    1.82
 -11   1   1   38.58    1.95
 -11   1   1   34.92    1.90
  10  -1  -1    1.22    0.56
  10  -1  -1    0.59    0.57
  10  -1  -1    0.72    0.50
 -10   1   1    0.52    0.61
 -10   1   1    0.86    0.44
 -10   1   1    1.38    0.55
 -10   1   1    0.67    0.56
   9  -1  -1    3.82    0.67
   9  -1  -1    3.20    0.65
   9  -1  -1    4.92    0.72
  -9   1   1    4.13    0.68
  -9   1   1    5.33    0.67
  -9   1   1    3.46    0.63
  -9   1   1    6.22    0.76
   8  -1  -1   74.22    2.86
   8  -1  -1   76.43    2.89
   8  -1  -1   72.16    2.90
  -8   1   1   75.89    2.88
  -8   1   1   73.16    2.85
  -8   1   1   69.54    2.89
  -8   1   1   72.98    2.89
   7  -1  -1   91.41    3.21
   7  -1  -1   85.11    3.24
   7  -1  -1   83.18    3.19
  -7   1   1   84.92    3.28
  -7   1   1   83.36    3.21
  -7   1   1   86.14    3.20
  -7   1   1   84.61    3.18
   6  -1  -1  114.55    4.06
   6  -1  -1  114.94    4.05
   6  -1  -1  111.86    4.10
  -6   1   1  119.09    4.07
  -6   1   1  112.47    4.09
  -6   1   1  115.99    4.04
  -6   1   1  109.78    4.23
   5  -1  -1  364.02   11.50
   5  -1  -1  349.00   11.66
   5  -1  -1  352.68   11.51
  -5   1   1  357.73   11.51
  -5   1   1  336.86   11.65
  -5   1   1  329.42   12.36
  -5   1   1  341.94   11.48
   4  -1  -1  143.04    4.72
   4  -1  -1  138.27    4.72
   4  -1  -1  133.45    4.77
  -4   1   1  146.53    4.74
  -4   1   1  139.41    4.72
  -4   1   1  138.41    4.78
  -4   1   1  131.26    5.00
   3  -1  -1   41.68    1.55
   3  -1  -1   35.82    1.57
   3  -1  -1   42.13    1.58
   3  -1  -1   45.67    1.58
  -3   1   1   47.24    1.59
  -3   1   1   42.68    1.59
  -3   1   1   40.71    1.59
  -3   1   1   42.12    1.56
   2  -1  -1  346.81   11.55
   2  -1  -1  357.05   11.38
   2  -1  -1  363.81   11.38
   2  -1  -1  321.89   12.29
  -2   1   1  356.86   11.55
  -2   1   1  341.51   11.37
  -2   1   1  326.45   12.36
  -2   1   1  373.97   11.39
   1  -1  -1   84.17    2.66
   1  -1  -1   82.53    2.66
   1  -1  -1   79.21    2.69
   1  -1  -1   73.29    2.82
  -1   1   1   76.62    2.65
  -1   1   1   82.99    2.66
  -1   1   1   76.06    2.82
  -1   1   1   80.39    2.70
  -3  -1  -1  133.87    4.55
  -3  -1  -1  140.33    4.47
  -3  -1  -1  126.81    4.85
  -3  -1  -1  136.02    4.60
  -3  -1  -1  135.01    4.47
   3   1   1  133.70    4.47
   3   1   1  141.79    4.47
   3   1   1  135.09    4.60
   3   1   1  134.13    4.55
  -4  -1  -1  402.29   13.01
  -4  -1  -1  412.51   13.02
  -4  -1  -1  374.84   14.13
   4   1   1  414.41   13.01
   4   1   1  406.08   13.01
   4   1   1  383.23   13.21
   4   1   1  398.77   13.44
  -5  -1  -1   22.96    0.96
  -5  -1  -1   21.70    0.93
  -5  -1  -1   20.00    0.96
   5   1   1   22.48    0.95
   5   1   1   22.56    0.94
   5   1   1   22.12    0.93
   5   1   1   22.07    0.98
  -6  -1  -1   27.48    1.26
  -6  -1  -1   31.38    1.24
  -6  -1  -1   29.62    1.26
  -6  -1  -1   30.79    1.23
   6   1   1   29.77    1.24
   6   1   1   28.69    1.26
   6   1   1   27.74    1.21
   6   1   1   27.49    1.21
  -7  -1  -1   19.60    0.95
  -7  -1  -1   14.98    0.90
  -7  -1  -1   19.63    0.96
  -7  -1  -1   18.30    0.95
   7   1   1   18.98    0.96
   7   1   1   18.07    0.98
   7   1   1   18.33    0.93
   7   1   1   18.28    0.92
  -8  -1  -1    3.37    0.50
  -8  -1  -1    4.10    0.54
  -8  -1  -1    4.30    0.56
  -8  -1  -1    3.57    0.52
   8   1   1    3.45    0.51
   8   1   1    3.76    0.54
   8   1   1    4.31    0.53
   8   1   1    4.00    0.53
  -9  -1  -1  147.68    5.11
  -9  -1  -1  142.43    5.42
  -9  -1  -1  138.78    5.17
  -9  -1  -1  143.76    5.11
   9   1   1  148.47    5.11
   9   1   1  145.75    5.20
   9   1   1  145.51    5.12
   9   1   1  142.72    5.22
 -10  -1  -1   32.57    1.60
 -10  -1  -1   32.01    1.58
 -10  -1  -1   34.30    1.61
 -10  -1  -1   31.78    1.58
  10   1   1   34.02    1.60
  10   1   1   33.14    1.65
  10   1   1   31.66    1.58
  10   1   1   34.04    1.62
 -11  -1  -1   30.89    1.60
 -11  -1  -1   30.26    1.57
 -11  -1  -1   28.34    1.53
 -11  -1  -1   29.20    1.54
  11   1   1   30.44    1.56
  11   1   1   29.93    1.56
  11   1   1   29.59    1.55
  11   1   1   30.58    1.63
 -12  -1  -1    6.48    0.91
 -12  -1  -1    7.58    0.91
 -12  -1  -1    7.98    0.94
 -12  -1  -1    5.04    0.79
  12   1   1    7.47    0.96
  12   1   1    5.76    0.81
  12   1   1    6.91    0.92
  12   1   1    5.90    0.82
 -13  -1  -1    1.00    0.64
 -13  -1  -1    0.42    0.63
 -13  -1  -1   -0.52    0.64
 -13  -1  -1    0.33    0.54
  13   1   1   -0.48    0.70
  13   1   1   -0.35    0.60
  13   1   1   -0.52    0.61
  13   1   1    1.27    0.63
 -14  -1  -1   -0.12    0.60
 -14  -1  -1    0.80    0.74
 -14  -1  -1   -0.96    0.61
 -14  -1  -1    0.44    0.61
  14   1   1   -0.47    0.68
  14   1   1    0.36    0.72
  14   1   1   -0.55    0.65
  14   1   1    1.91    0.76
 -15  -1  -1    3.70    0.86
 -15  -1  -1    5.11    1.04
 -15  -1  -1    3.34    0.96
 -15  -1  -1    3.38    0.89
  15   1   1    4.66    0.98
  15   1   1    4.04    0.99
  15   1   1    4.52    1.03
  15   1   1    3.65    0.92
 -16  -1  -1    1.05    0.90
 -16  -1  -1    1.08    0.83
 -16  -1  -1    1.17    1.02
 -16  -1  -1    1.87    0.95
  16   1   1    2.10    1.04
  16   1   1    2.32    0.92
  16   1   1    1.49    1.04
  16   1   1    2.32    1.02
 -17  -1  -1    2.13    0.99
 -17  -1  -1    2.00    1.06
 -17  -1  -1    3.22    1.20
 -17  -1  -1    1.13    1.13
  17   1   1    2.88    1.21
  17   1   1    1.35    1.09
  17   1   1    2.37    1.15
  17   1   1    2.43    1.19
 -18  -1  -1    6.39    1.46
 -18  -1  -1    5.81    1.24
 -18  -1  -1    6.79    1.61
 -18  -1  -1    4.99    1.39
  18   1   1    6.06    1.50
  18   1   1    5.15    1.56
  18   1   1    5.44    1.56
  18   1   1    6.60    1.61
 -19  -1  -1   -2.73    1.20
 -19  -1  -1    1.14    1.18
 -19  -1  -1    2.17    1.49
 -19  -1  -1    0.53    1.51
  19   1   1    2.31    1.37
  19   1   1    1.81    1.53
  19   1   1    1.84    1.63
 -20  -1  -1    0.07    1.68
 -20  -1  -1    3.12    1.99
 -20  -1  -1    1.43    1.47
 -20  -1  -1   -0.47    1.61
  20   1   1    4.08    1.75
  20   1   1    1.19    2.06
  18  -2  -1    0.36    1.54
  18  -2  -1    0.23    1.94
  18  -2  -1    1.35    2.05
 -18   2   1    0.54    1.27
 -18   2   1    2.75    1.52
 -18   2   1    2.45    1.65
  17  -2  -1    0.32    1.61
  17  -2  -1   -3.62    1.60
  17  -2  -1   -0.49    1.55
  17  -2  -1    0.14    1.32
 -17   2   1    0.58    1.07
 -17   2   1   -2.56    1.43
 -17   2   1    0.79    1.25
 -17   2   1    0.94    1.44
  16  -2  -1    1.53    1.37
  16  -2  -1    1.30    1.08
  16  -2  -1   -1.29    1.35
 -16   2   1   -0.72    1.26
 -16   2   1   -2.28    1.29
 -16   2   1    1.34    1.13
 -16   2   1    0.59    0.97
  15  -2  -1    3.86    1.30
  15  -2  -1    5.85    1.31
  15  -2  -1    3.65    1.11
  15  -2  -1    4.37    1.35
 -15   2   1    3.88    1.08
 -15   2   1    4.00    1.19
 -15   2   1    4.41    1.29
 -15   2   1    5.13    1.03
  14  -2  -1    9.53    1.38
  14  -2  -1    8.57    1.29
  14  -2  -1    8.17    1.32
 -14   2   1    6.04    1.22
 -14   2   1    8.44    1.08
 -14   2   1    7.85    1.14
 -14   2   1    9.31    1.20
  13  -2  -1    3.95    0.96
  13  -2  -1    3.40    0.85
  13  -2  -1    4.30    1.04
 -13   2   1    4.12    0.79
 -13   2   1    3.25    0.88
 -13   2   1    2.42    0.95
 -13   2   1    3.61    0.88
  12  -2  -1   22.90    1.60
  12  -2  -1   20.76    1.64
  12  -2  -1   23.71    1.71
 -12   2   1   22.79    1.49
 -12   2   1   23.45    1.60
 -12   2   1   20.02    1.60
 -12   2   1   22.96    1.67
  11  -2  -1   15.47    1.33
  11  -2  -1   16.15    1.45
  11  -2  -1   17.36    1.45
 -11   2   1   18.21    1.20
 -11   2   1   15.55    1.32
 -11   2   1   15.47    1.34
 -11   2   1   16.28    1.40
  10  -2  -1   12.49    1.16
  10  -2  -1   10.41    1.10
  10  -2  -1   10.61    1.16
 -10   2   1   12.18    1.17
 -10   2   1    9.92    1.09
 -10   2   1    9.44    0.92
 -10   2   1   10.74    1.07
   9  -2  -1   31.47    1.60
   9  -2  -1   26.00    1.55
   9  -2  -1   28.33    1.51
  -9   2   1   28.20    1.58
  -9   2   1   28.21    1.52
  -9   2   1   31.05    1.46
  -9   2   1   26.28    1.51
   8  -2  -1    1.59    0.51
   8  -2  -1    0.98    0.45
   8  -2  -1    0.73    0.47
  -8   2   1    1.49    0.48
  -8   2   1    1.38    0.47
  -8   2   1    1.05    0.35
  -8   2   1    1.11    0.47
   7  -2  -1   36.70    1.65
   7  -2  -1   36.31    1.67
   7  -2  -1   35.53    1.60
  -7   2   1   35.04    1.65
  -7   2   1   34.16    1.60
  -7   2   1   37.94    1.66
  -7   2   1   36.91    1.58
   6  -2  -1   21.01    1.10
   6  -2  -1   21.12    1.09
   6  -2  -1   20.44    1.05
   6  -2  -1   19.41    0.97
  -6   2   1   22.03    1.12
  -6   2   1   20.27    1.01
  -6   2   1   20.95    1.09
  -6   2   1   21.27    1.08
   5  -2  -1  192.53    7.66
   5  -2  -1  221.20    7.23
   5  -2  -1  208.60    7.31
   5  -2  -1  223.24    7.22
  -5   2   1  211.30    7.31
  -5   2   1  219.65    7.21
  -5   2   1  209.26    7.69
  -5   2   1  222.53    7.23
   4  -2  -1  282.95   10.81
   4  -2  -1  304.02   10.07
   4  -2  -1  287.96   10.06
   4  -2  -1  299.29   10.23
  -4   2   1  310.82   10.08
  -4   2   1  319.25   10.08
  -4   2   1  317.90   10.24
  -4   2   1  310.79   10.83
   3  -2  -1  135.25    4.80
   3  -2  -1  125.21    5.00
   3  -2  -1  140.62    4.73
   3  -2  -1  143.99    4.73
  -3   2   1  137.43    5.02
  -3   2   1  149.26    4.74
  -3   2   1  144.40    4.73
  -3   2   1  141.78    4.80
   2  -2  -1  158.14    6.36
   2  -2  -1  171.71    5.93
   2  -2  -1  172.46    6.03
   2  -2  -1  178.90    5.94
  -2   2   1  197.06    5.96
  -2   2   1  178.98    6.37
  -2   2   1  187.15    6.04
  -2   2   1  188.55    5.95
   1  -2  -1   33.42    1.21
   1  -2  -1   33.33    1.21
   1  -2  -1   30.56    1.24
   1  -2  -1   32.77    1.24
  -1   2   1   35.90    1.21
  -1   2   1   34.80    1.21
   0  -2  -1  540.88   17.90
   0  -2  -1  578.52   18.00
   0  -2  -1  533.89   19.47
   0   2   1  546.95   17.92
  -2  -2  -1   36.66    1.21
  -2  -2  -1   35.62    1.28
  -2  -2  -1   35.06    1.26
  -3  -2  -1  135.59    4.56
  -3  -2  -1  139.16    4.73
  -3  -2  -1  140.55    4.57
   3   2   1  131.80    4.72
   3   2   1  133.19    4.65
   3   2   1  133.89    4.56
   3   2   1  156.05    4.57
  -4  -2  -1   88.94    2.99
  -4  -2  -1   92.13    2.91
  -4  -2  -1   85.53    2.89
  -4  -2  -1   86.48    2.96
   4   2   1   78.76    2.95
   4   2   1   78.30    2.97
   4   2   1   86.15    2.89
   4   2   1   83.72    2.90
  -5  -2  -1  283.89    9.49
  -5  -2  -1  281.43    9.18
  -5  -2  -1  285.55    9.18
  -5  -2  -1  276.08    9.33
   5   2   1  265.69    9.32
   5   2   1  277.49    9.18
   5   2   1  280.46    9.48
   5   2   1  278.62    9.17
  -6  -2  -1   72.29    2.98
  -6  -2  -1   82.72    2.82
  -6  -2  -1   81.25    2.81
  -6  -2  -1   77.71    2.85
   6   2   1   78.34    2.86
   6   2   1   82.55    2.82
   6   2   1   78.25    2.86
   6   2   1   78.67    2.80
  -7  -2  -1    2.29    0.40
  -7  -2  -1    1.45    0.32
  -7  -2  -1    1.60    0.35
  -7  -2  -1    2.64    0.38
   7   2   1    1.72    0.34
   7   2   1    1.51    0.38
   7   2   1    1.47    0.35
   7   2   1    1.24    0.32
  -8  -2  -1   35.43    1.59
  -8  -2  -1   35.32    1.55
  -8  -2  -1   35.71    1.55
  -8  -2  -1   37.79    1.61
   8   2   1   37.09    1.57
   8   2   1   36.17    1.57
   8   2   1   35.52    1.57
   8   2   1   36.35    1.61
  -9  -2  -1  102.46    3.71
  -9  -2  -1  100.35    3.76
  -9  -2  -1  101.48    3.70
  -9  -2  -1  101.39    3.91
   9   2   1  102.94    3.78
   9   2   1  100.26    3.78
   9   2   1  102.26    3.70
   9   2   1   98.80    3.70
 -10  -2  -1   24.25    1.25
 -10  -2  -1   23.55    1.30
 -10  -2  -1   22.50    1.25
 -10  -2  -1   23.73    1.28
  10   2   1   24.54    1.33
  10   2   1   22.98    1.26
  10   2   1   21.59    1.27
  10   2   1   24.20    1.28
 -11  -2  -1   12.24    1.03
 -11  -2  -1   13.24    1.00
 -11  -2  -1   14.87    1.02
 -11  -2  -1   11.56    0.93
  11   2   1   13.19    1.01
  11   2   1   13.67    1.02
  11   2   1   14.87    1.05
  11   2   1   13.42    1.05
 -12  -2  -1    8.38    0.98
 -12  -2  -1    9.09    0.95
 -12  -2  -1    7.43    0.94
 -12  -2  -1    9.57    0.93
  12   2   1    7.24    0.94
  12   2   1    9.44    1.05
  12   2   1    8.12    1.02
  12   2   1    9.94    1.01
 -13  -2  -1    8.96    1.04
 -13  -2  -1   10.66    1.11
 -13  -2  -1    8.73    1.04
 -13  -2  -1    9.24    1.04
  13   2   1    9.46    1.12
  13   2   1    9.17    1.10
  13   2   1    9.11    1.10
  13   2   1   11.98    1.12
 -14  -2  -1    3.22    0.85
 -14  -2  -1    1.12    0.82
 -14  -2  -1    2.11    0.75
 -14  -2  -1    1.80    0.69
  14   2   1    1.29    0.83
  14   2   1    3.92    0.86
  14   2   1    2.77    0.78
  14   2   1    0.36    0.80
 -15  -2  -1    0.68    0.73
 -15  -2  -1   -0.40    0.78
 -15  -2  -1    0.69    0.66
 -15  -2  -1    1.49    0.88
  15   2   1    0.09    0.86
  15   2   1    0.36    0.75
  15   2   1    2.28    0.83
  15   2   1   -0.27    0.74
 -16  -2  -1    0.98    1.00
 -16  -2  -1    0.35    0.74
 -16  -2  -1    1.65    0.85
 -16  -2  -1    1.04    0.92
  16   2   1   -0.66    0.81
  16   2   1    0.50    0.96
  16   2   1    1.27    0.85
  16   2   1   -0.54    0.85
 -17  -2  -1    1.79    1.14
 -17  -2  -1    0.90    0.85
 -17  -2  -1    1.91    1.03
 -17  -2  -1    0.47    0.99
  17   2   1    2.36    1.08
  17   2   1    1.55    1.15
  17   2   1    1.90    1.18
  17   2   1    1.64    1.09
 -18  -2  -1    8.22    1.28
 -18  -2  -1    6.43    1.55
 -18  -2  -1    7.80    1.34
 -18  -2  -1    5.74    1.39
  18   2   1    6.30    1.44
  18   2   1    6.48    1.40
  18   2   1    6.41    1.52
  18   2   1    7.15    1.60
 -19  -2  -1   -0.25    1.35
 -19  -2  -1    3.54    1.59
 -19  -2  -1    1.16    1.15
 -19  -2  -1    3.49    1.34
  19   2   1    2.80    1.58
  19   2   1    3.52    1.47
  19   2   1    2.38    1.43
 -20  -2  -1    3.15    1.58
 -20  -2  -1   -1.19    1.56
 -20  -2  -1    3.23    1.89
 -20  -2  -1    1.08    1.28
  20   2   1    3.63    1.90
  20   2   1    0.19    1.64
 -21  -2  -1    0.88    1.69
 -21  -2  -1   -3.49    1.93
 -21  -2  -1    1.57    1.65
  21   2   1    1.89    1.82
  21   2   1    1.49    2.25
  18  -3  -1    1.44    1.63
  18  -3  -1   -1.27    1.92
 -18   3   1    4.43    1.83
 -18   3   1    2.38    1.34
  17  -3  -1   -0.05    1.31
  17  -3  -1   -3.79    1.62
  17  -3  -1    0.14    1.60
 -17   3   1   -2.92    1.46
 -17   3   1    0.43    1.10
 -17   3   1    2.01    1.58
 -17   3   1    1.24    1.37
  16  -3  -1   -0.06    1.38
  16  -3  -1   -0.01    1.25
  16  -3  -1    1.80    1.41
  16  -3  -1    0.92    1.37
 -16   3   1    1.03    1.20
 -16   3   1    0.57    0.96
 -16   3   1   -0.09    1.34
 -16   3   1    1.86    1.29
  15  -3  -1    5.00    1.35
  15  -3  -1    5.21    1.30
  15  -3  -1    6.82    1.46
 -15   3   1    5.46    1.17
 -15   3   1    3.63    1.27
 -15   3   1    1.54    1.14
 -15   3   1    5.86    1.09
  14  -3  -1    4.16    1.22
  14  -3  -1    3.18    1.03
  14  -3  -1    3.94    1.13
 -14   3   1    2.72    0.98
 -14   3   1    3.16    1.05
 -14   3   1    4.26    0.92
 -14   3   1    2.76    1.17
  13  -3  -1    8.60    1.23
  13  -3  -1    7.64    1.27
  13  -3  -1    8.55    1.22
 -13   3   1    6.24    1.21
 -13   3   1    6.03    1.01
 -13   3   1    8.19    1.11
 -13   3   1    8.09    0.99
  12  -3  -1    1.01    0.85
  12  -3  -1    2.56    0.79
  12  -3  -1    1.87    0.82
 -12   3   1    2.09    0.85
 -12   3   1    2.25    0.90
 -12   3   1    0.87    0.78
 -12   3   1    2.73    0.69
  11  -3  -1   10.08    1.18
  11  -3  -1    7.82    1.03
  11  -3  -1    6.28    0.92
 -11   3   1   10.59    1.17
 -11   3   1    7.19    0.98
 -11   3   1    8.81    1.14
 -11   3   1    8.94    1.12
  10  -3  -1   32.27    1.84
  10  -3  -1   31.42    1.81
  10  -3  -1   35.76    1.82
 -10   3   1   31.73    1.79
 -10   3   1   31.49    1.66
 -10   3   1   33.71    1.77
 -10   3   1   31.05    1.82
   9  -3  -1   74.83    3.07
   9  -3  -1   72.09    3.02
   9  -3  -1   71.75    3.04
  -9   3   1   71.76    3.03
  -9   3   1   74.04    3.00
  -9   3   1   72.80    3.00
  -9   3   1   78.07    3.08
   8  -3  -1   20.06    1.23
   8  -3  -1   15.03    0.97
   8  -3  -1   20.53    1.24
   8  -3  -1   19.13    1.19
  -8   3   1   17.04    1.03
  -8   3   1   20.87    1.21
  -8   3   1   17.67    1.21
  -8   3   1   18.08    1.15
   7  -3  -1    4.87    0.61
   7  -3  -1    4.38    0.50
   7  -3  -1    4.18    0.60
   7  -3  -1    5.10    0.65
  -7   3   1    4.66    0.62
  -7   3   1    3.71    0.47
  -7   3   1    3.78    0.53
  -7   3   1    4.10    0.62
   6  -3  -1   36.62    1.63
   6  -3  -1   32.47    1.49
   6  -3  -1   37.11    1.59
   6  -3  -1   36.09    1.61
  -6   3   1   36.67    1.61
  -6   3   1   35.25    1.58
  -6   3   1   36.80    1.54
  -6   3   1   36.19    1.62
   5  -3  -1   83.09    3.17
   5  -3  -1   83.23    3.09
   5  -3  -1   83.31    3.10
   5  -3  -1   82.79    3.15
  -5   3   1   86.00    3.20
  -5   3   1   85.20    3.09
  -5   3   1   82.91    3.09
  -5   3   1   89.83    3.17
   4  -3  -1  213.77    7.27
   4  -3  -1  212.01    7.38
   4  -3  -1  223.33    7.27
   4  -3  -1  207.31    7.73
  -4   3   1  216.51    7.26
  -4   3   1  218.76    7.38
  -4   3   1  221.29    7.76
  -4   3   1  213.43    7.25
   3  -3  -1  176.86    5.88
   3  -3  -1  175.83    5.98
   3  -3  -1  165.78    6.26
   3  -3  -1  175.32    5.88
  -3   3   1  171.10    6.27
  -3   3   1  181.07    5.89
  -3   3   1  176.02    5.88
   2  -3  -1   23.82    0.99
   2  -3  -1   22.55    0.97
   2  -3  -1   24.13    1.00
   2  -3  -1   23.25    1.02
  -2   3   1   25.69    1.01
  -2   3   1   24.74    0.98
  -2   3   1   24.81    1.00
   1  -3  -1  145.68    4.90
   1  -3  -1  150.48    4.91
   1  -3  -1  144.78    5.27
  -1   3   1  147.18    5.27
  -1   3   1  152.58    4.92
  -1   3   1  144.06    4.90
   0  -3  -1   20.17    0.80
   0  -3  -1   19.27    0.83
   0   3   1   22.41    0.81
   0   3   1   19.88    0.83
  -1  -3  -1   64.88    2.15
  -1  -3  -1   63.87    2.27
   1   3   1   65.24    2.15
   1   3   1   61.85    2.26
  -2  -3  -1    8.76    0.36
  -2  -3  -1    8.89    0.42
  -2  -3  -1    9.49    0.37
   2   3   1    7.19    0.35
  -3  -3  -1   48.63    1.85
  -3  -3  -1   49.98    1.76
  -3  -3  -1   48.68    1.82
  -3  -3  -1   51.39    1.76
   3   3   1   53.02    1.85
   3   3   1   54.85    1.77
   3   3   1   52.04    1.83
  -4  -3  -1  411.99   13.19
  -4  -3  -1  418.55   13.19
  -4  -3  -1  403.07   13.42
  -4  -3  -1  408.01   13.67
   4   3   1  408.81   13.18
   4   3   1  390.59   13.41
   4   3   1  395.18   13.67
   4   3   1  404.48   13.19
  -5  -3  -1  131.56    4.63
  -5  -3  -1  131.93    4.53
  -5  -3  -1  137.63    4.55
  -5  -3  -1  136.67    4.70
   5   3   1  132.52    4.63
   5   3   1  141.27    4.55
   5   3   1  136.18    4.55
   5   3   1  130.48    4.69
  -6  -3  -1  110.66    3.89
  -6  -3  -1  114.37    3.93
  -6  -3  -1  116.38    3.82
  -6  -3  -1  112.41    3.81
   6   3   1  105.82    3.88
   6   3   1  106.45    3.92
   6   3   1  109.31    3.80
   6   3   1  109.45    3.81
  -7  -3  -1   19.00    0.92
  -7  -3  -1   18.71    0.91
  -7  -3  -1   17.76    0.94
  -7  -3  -1   18.45    0.92
   7   3   1   17.38    0.91
   7   3   1   17.21    0.95
   7   3   1   17.70    0.91
   7   3   1   19.20    0.93
  -8  -3  -1   40.67    1.77
  -8  -3  -1   42.49    1.77
  -8  -3  -1   42.58    1.81
  -8  -3  -1   43.93    1.87
   8   3   1   46.07    1.86
   8   3   1   43.22    1.80
   8   3   1   46.39    1.82
   8   3   1   45.28    1.79
  -9  -3  -1  106.29    3.89
  -9  -3  -1   99.48    4.05
  -9  -3  -1  108.79    3.84
  -9  -3  -1  109.31    3.83
   9   3   1  108.08    3.82
   9   3   1  103.28    3.89
   9   3   1  106.78    3.84
   9   3   1  102.65    3.91
 -10  -3  -1   10.78    0.90
 -10  -3  -1    9.84    0.84
 -10  -3  -1   10.39    0.79
 -10  -3  -1    9.83    0.85
  10   3   1    9.22    0.85
  10   3   1    9.10    0.90
  10   3   1    8.88    0.85
  10   3   1   10.48    0.85
 -11  -3  -1    0.87    0.44
 -11  -3  -1    1.53    0.50
 -11  -3  -1    2.19    0.47
 -11  -3  -1    1.94    0.52
  11   3   1    1.40    0.51
  11   3   1    1.87    0.53
  11   3   1    1.70    0.55
  11   3   1    2.10    0.58
 -12  -3  -1    1.74    0.59
 -12  -3  -1    2.84    0.65
 -12  -3  -1    2.36    0.52
 -12  -3  -1    2.78    0.63
  12   3   1    3.19    0.66
  12   3   1    2.55    0.64
  12   3   1    2.65    0.66
  12   3   1    3.26    0.66
 -13  -3  -1    4.19    0.83
 -13  -3  -1    5.83    0.88
 -13  -3  -1    5.37    0.85
 -13  -3  -1    4.99    0.81
  13   3   1    4.22    0.83
  13   3   1    5.18    0.91
  13   3   1    6.07    0.91
  13   3   1    4.81    0.86
 -14  -3  -1    1.92    0.77
 -14  -3  -1    0.78    0.73
 -14  -3  -1    3.45    0.76
 -14  -3  -1    2.41    0.78
  14   3   1    2.07    0.74
  14   3   1   -0.36    0.79
  14   3   1    1.31    0.84
  14   3   1    3.37    0.78
 -15  -3  -1    1.95    0.69
 -15  -3  -1   -0.38    0.75
 -15  -3  -1    2.58    0.80
 -15  -3  -1    0.00    0.75
  15   3   1   -0.04    0.78
  15   3   1    0.96    0.83
  15   3   1    0.94    0.75
  15   3   1    0.51    0.77
 -16  -3  -1    3.47    0.91
 -16  -3  -1    2.76    0.96
 -16  -3  -1    3.73    0.93
 -16  -3  -1    3.20    1.08
  16   3   1    2.97    0.92
  16   3   1    3.53    1.11
  16   3   1    4.22    1.01
  16   3   1    2.85    0.97
 -17  -3  -1    0.32    0.84
 -17  -3  -1    1.44    0.83
 -17  -3  -1    1.91    1.16
 -17  -3  -1    2.55    0.97
  17   3   1    2.12    1.15
  17   3   1    0.87    1.06
  17   3   1    1.87    1.06
  17   3   1    1.08    1.03
 -18  -3  -1    8.65    1.62
 -18  -3  -1    7.91    1.27
 -18  -3  -1    8.34    1.35
 -18  -3  -1    7.74    1.39
  18   3   1    8.31    1.50
  18   3   1    9.24    1.52
  18   3   1    7.36    1.37
  18   3   1    7.66    1.45
 -19  -3  -1    4.20    1.31
 -19  -3  -1    4.76    1.23
 -19  -3  -1    3.81    1.65
 -19  -3  -1    4.21    1.30
  19   3   1    5.12    1.48
  19   3   1    4.53    1.51
  19   3   1    5.18    1.53
 -20  -3  -1    2.68    1.72
 -20  -3  -1    1.53    1.35
 -20  -3  -1   -1.03    1.40
 -20  -3  -1    0.15    1.37
  20   3   1    1.09    1.77
  20   3   1   -2.14    1.57
 -21  -3  -1   -2.83    1.60
 -21  -3  -1   -2.81    1.43
 -21  -3  -1   -0.04    2.12
 -21  -3  -1    0.11    1.71
  21   3   1    1.90    1.89
  21   3   1   -0.11    2.25
  17  -4  -1   -0.62    1.43
  17  -4  -1    2.31    1.89
  17  -4  -1    0.10    1.83
 -17   4   1   -0.34    1.55
 -17   4   1    0.62    1.25
  16  -4  -1    0.90    1.60
  16  -4  -1    0.68    1.45
  16  -4  -1   -1.55    1.24
 -16   4   1    0.54    1.06
 -16   4   1   -2.84    1.24
 -16   4   1   -1.55    1.33
  15  -4  -1    1.87    1.27
  15  -4  -1    2.90    1.36
  15  -4  -1    1.55    1.15
 -15   4   1    2.40    0.98
 -15   4   1   -1.59    1.09
 -15   4   1    1.93    1.29
  14  -4  -1    4.21    1.15
  14  -4  -1    3.16    1.21
  14  -4  -1    2.39    1.14
 -14   4   1    4.09    1.02
 -14   4   1    4.46    1.31
 -14   4   1    3.37    0.93
 -14   4   1    2.43    1.08
  13  -4  -1    5.64    1.13
  13  -4  -1    6.89    1.18
  13  -4  -1    6.11    1.26
 -13   4   1    6.77    0.96
 -13   4   1    6.69    1.19
 -13   4   1    6.72    1.23
 -13   4   1    5.33    1.13
  12  -4  -1    3.12    0.93
  12  -4  -1    3.88    1.02
  12  -4  -1    4.72    1.04
 -12   4   1    5.04    0.79
 -12   4   1    6.34    1.17
 -12   4   1    4.86    0.91
 -12   4   1    4.37    0.98
  11  -4  -1   -0.07    0.65
  11  -4  -1    0.43    0.67
  11  -4  -1    0.28    0.68
 -11   4   1    0.15    0.63
 -11   4   1    0.02    0.54
 -11   4   1    0.30    0.60
 -11   4   1    0.57    0.76
  10  -4  -1   17.25    1.46
  10  -4  -1   20.12    1.41
  10  -4  -1   22.68    1.58
 -10   4   1   19.64    1.27
 -10   4   1   20.05    1.46
 -10   4   1   21.00    1.53
   9  -4  -1   85.69    3.38
   9  -4  -1   89.28    3.52
   9  -4  -1   78.43    3.38
   9  -4  -1   82.89    3.34
  -9   4   1   83.94    3.42
  -9   4   1   83.48    3.38
  -9   4   1   84.61    3.42
  -9   4   1   83.64    3.37
   8  -4  -1   70.06    2.81
   8  -4  -1   67.32    2.87
   8  -4  -1   71.68    2.87
   8  -4  -1   65.27    2.75
  -8   4   1   70.60    2.88
  -8   4   1   69.68    2.81
  -8   4   1   70.05    2.87
  -8   4   1   66.17    2.79
   7  -4  -1   23.37    1.24
   7  -4  -1   19.05    1.05
   7  -4  -1   22.45    1.27
   7  -4  -1   22.96    1.30
  -7   4   1   19.86    1.11
  -7   4   1   22.93    1.27
  -7   4   1   21.78    1.22
  -7   4   1   20.66    1.26
   6  -4  -1   25.96    1.39
   6  -4  -1   28.11    1.36
   6  -4  -1   28.72    1.35
   6  -4  -1   25.95    1.22
  -6   4   1   25.07    1.24
  -6   4   1   27.23    1.36
  -6   4   1   27.62    1.33
  -6   4   1   27.35    1.38
   5  -4  -1   23.58    1.23
   5  -4  -1   23.53    1.18
   5  -4  -1   22.59    1.17
   5  -4  -1   21.82    1.08
  -5   4   1   23.78    1.18
  -5   4   1   26.50    1.23
  -5   4   1   25.99    1.13
   4  -4  -1  110.01    3.90
   4  -4  -1  114.51    3.90
   4  -4  -1  107.29    4.06
   4  -4  -1  109.71    3.97
  -4   4   1  111.02    3.90
  -4   4   1  110.55    3.90
  -4   4   1  108.18    4.07
   3  -4  -1  178.95    6.64
   3  -4  -1  190.04    6.25
   3  -4  -1  194.17    6.25
   3  -4  -1  187.92    6.37
  -3   4   1  178.20    6.23
  -3   4   1  176.33    6.65
  -3   4   1  188.04    6.25
   2  -4  -1  144.41    4.79
   2  -4  -1  139.73    4.79
   2  -4  -1  131.69    5.09
   2  -4  -1  139.78    4.89
  -2   4   1  140.74    4.79
  -2   4   1  151.67    4.81
  -2   4   1  140.88    5.11
   1  -4  -1   30.38    1.25
   1  -4  -1   31.27    1.29
  -1   4   1   33.62    1.26
  -1   4   1   34.65    1.31
  -1   4   1   34.24    1.28
   0  -4  -1    0.38    0.15
   0  -4  -1    0.41    0.22
   0  -4  -1    0.48    0.17
   0   4   1    0.51    0.16
   0   4   1    0.80    0.19
  -1  -4  -1  102.51    3.46
  -1  -4  -1  102.47    3.63
   1   4   1   94.66    3.62
   1   4   1  114.94    3.48
  -2  -4  -1  133.33    4.39
  -2  -4  -1  133.92    4.60
   2   4   1  128.36    4.59
   2   4   1  134.34    4.39
  -3  -4  -1  114.38    3.84
  -3  -4  -1  114.31    3.95
  -3  -4  -1  118.66    4.03
  -3  -4  -1  113.85    3.84
   3   4   1  118.26    3.84
   3   4   1  113.61    4.02
   3   4   1  112.16    3.84
  -4  -4  -1   37.59    1.36
  -4  -4  -1   36.79    1.44
  -4  -4  -1   37.75    1.42
  -4  -4  -1   39.39    1.37
   4   4   1   35.80    1.42
   4   4   1   37.95    1.36
   4   4   1   36.03    1.43
   4   4   1   36.35    1.36
  -5  -4  -1   22.56    0.91
  -5  -4  -1   22.29    0.96
  -5  -4  -1   21.64    0.96
  -5  -4  -1   21.60    0.90
   5   4   1   21.92    0.92
   5   4   1   20.46    0.95
   5   4   1   20.76    0.95
   5   4   1   22.19    0.90
  -6  -4  -1  114.35    4.06
  -6  -4  -1  116.25    3.97
  -6  -4  -1  114.56    4.11
  -6  -4  -1  117.29    3.98
   6   4   1  118.06    3.98
   6   4   1  114.52    4.12
   6   4   1  118.35    3.99
   6   4   1  114.26    4.06
  -7  -4  -1  122.24    4.25
  -7  -4  -1  125.53    4.39
  -7  -4  -1  125.67    4.26
  -7  -4  -1  117.13    4.33
   7   4   1  130.30    4.28
   7   4   1  121.38    4.39
   7   4   1  120.34    4.24
   7   4   1  120.78    4.34
  -8  -4  -1   17.36    0.92
  -8  -4  -1   15.60    0.90
  -8  -4  -1   16.07    0.94
  -8  -4  -1   16.40    0.90
   8   4   1   15.98    0.92
   8   4   1   16.30    0.95
   8   4   1   16.02    0.91
   8   4   1   15.39    0.91
  -9  -4  -1    5.64    0.67
  -9  -4  -1    5.64    0.66
  -9  -4  -1    6.32    0.66
   9   4   1    5.92    0.68
   9   4   1    6.32    0.69
   9   4   1    6.22    0.66
   9   4   1    5.83    0.69
 -10  -4  -1    9.71    0.83
 -10  -4  -1    9.29    0.87
 -10  -4  -1    9.64    0.82
 -10  -4  -1    8.92    0.76
  10   4   1    8.60    0.80
  10   4   1    8.59    0.85
  10   4   1    8.90    0.87
  10   4   1    8.90    0.83
 -11  -4  -1   15.87    1.02
 -11  -4  -1   14.66    1.08
 -11  -4  -1   16.84    1.10
 -11  -4  -1   17.39    1.09
  11   4   1   16.77    1.09
  11   4   1   15.91    1.10
  11   4   1   16.39    1.06
  11   4   1   14.74    1.11
 -12  -4  -1    0.58    0.38
 -12  -4  -1    0.50    0.45
 -12  -4  -1   -0.08    0.44
 -12  -4  -1    0.42    0.48
  12   4   1    0.28    0.47
  12   4   1   -0.28    0.49
  12   4   1   -0.29    0.46
  12   4   1   -0.73    0.45
 -13  -4  -1    3.90    0.82
 -13  -4  -1    4.68    0.70
 -13  -4  -1    3.87    0.76
 -13  -4  -1    4.01    0.77
  13   4   1    4.75    0.85
  13   4   1    4.41    0.89
  13   4   1    6.54    0.96
  13   4   1    4.02    0.80
 -14  -4  -1   16.57    1.45
 -14  -4  -1   24.04    1.52
 -14  -4  -1   19.14    1.53
 -14  -4  -1   18.66    1.55
  14   4   1   18.25    1.59
  14   4   1   20.69    1.59
  14   4   1   19.61    1.61
  14   4   1   21.02    1.53
 -15  -4  -1    2.83    0.84
 -15  -4  -1    3.56    0.92
 -15  -4  -1    2.99    0.74
 -15  -4  -1    2.90    0.84
  15   4   1    2.81    0.86
  15   4   1    4.12    0.83
  15   4   1    3.27    0.93
  15   4   1    3.12    0.85
 -16  -4  -1    4.36    0.98
 -16  -4  -1    2.86    0.82
 -16  -4  -1    3.08    1.03
 -16  -4  -1    2.99    0.82
  16   4   1    1.77    0.90
  16   4   1    3.52    0.88
  16   4   1    3.90    0.93
  16   4   1    3.67    1.05
 -17  -4  -1    4.84    1.01
 -17  -4  -1    4.68    1.26
 -17  -4  -1    5.39    1.10
 -17  -4  -1    3.83    1.08
  17   4   1    4.51    1.30
  17   4   1    5.86    1.21
  17   4   1    5.55    1.18
  17   4   1    4.85    1.16
 -18  -4  -1    0.78    1.03
 -18  -4  -1    2.43    1.36
 -18  -4  -1    2.67    1.01
 -18  -4  -1    1.10    1.00
  18   4   1    1.64    1.11
  18   4   1    3.38    1.29
  18   4   1    2.26    1.18
  18   4   1    1.33    1.13
 -19  -4  -1    5.69    1.31
 -19  -4  -1    5.22    1.38
 -19  -4  -1    1.80    1.46
 -19  -4  -1    4.16    1.25
  19   4   1    4.15    1.50
  19   4   1    3.87    1.54
  19   4   1    1.34    1.29
  19   4   1    3.22    1.37
 -20  -4  -1    4.70    1.51
 -20  -4  -1    4.17    1.41
 -20  -4  -1    3.01    1.65
 -20  -4  -1    1.74    1.30
  20   4   1    1.25    1.44
  20   4   1    3.92    1.70
  20   4   1    0.50    1.50
 -21  -4  -1   -0.01    1.53
 -21  -4  -1   -2.22    1.93
 -21  -4  -1   -1.40    1.53
 -21  -4  -1   -0.52    1.45
  21   4   1   -0.73    1.87
  21   4   1   -2.10    1.99
  17  -5  -1   -0.39    1.49
  17  -5  -1    2.02    2.09
 -17   5   1    1.84    1.82
 -17   5   1    0.85    1.27
  16  -5  -1    0.99    1.76
  16  -5  -1    2.08    1.38
 -16   5   1   -1.13    1.10
 -16   5   1    0.14    1.49
  15  -5  -1    0.42    1.43
  15  -5  -1   -0.10    1.40
  15  -5  -1    2.07    1.31
 -15   5   1   -0.71    1.38
 -15   5   1    0.70    1.07
 -15   5   1   -1.56    1.12
  14  -5  -1    3.05    1.36
  14  -5  -1    0.46    1.01
  14  -5  -1   -1.67    1.18
 -14   5   1   -1.35    0.95
 -14   5   1   -1.16    1.08
 -14   5   1    0.83    0.92
  13  -5  -1    6.36    1.25
  13  -5  -1    9.17    1.39
  13  -5  -1    6.83    1.33
 -13   5   1    6.56    1.16
 -13   5   1    8.35    1.34
 -13   5   1    6.89    1.01
  12  -5  -1    3.98    1.02
  12  -5  -1    4.15    0.94
  12  -5  -1    4.44    1.07
 -12   5   1    3.68    0.78
 -12   5   1    4.42    1.07
 -12   5   1    4.06    0.92
  11  -5  -1    3.86    0.94
  11  -5  -1    4.57    0.90
  11  -5  -1    4.01    0.96
 -11   5   1    4.89    0.77
 -11   5   1    5.71    0.94
 -11   5   1    6.27    1.12
  10  -5  -1   11.45    0.98
  10  -5  -1   11.81    1.35
  10  -5  -1   12.13    1.38
  10  -5  -1    9.46    1.14
 -10   5   1   11.91    1.20
 -10   5   1   11.75    1.06
 -10   5   1   12.93    1.34
   9  -5  -1   33.56    1.88
   9  -5  -1   34.27    1.65
   9  -5  -1   29.85    1.77
   9  -5  -1   34.26    1.92
  -9   5   1   33.93    1.73
  -9   5   1   36.17    1.90
  -9   5   1   32.83    1.78
   8  -5  -1   32.85    1.81
   8  -5  -1   33.55    1.71
   8  -5  -1   33.79    1.78
   8  -5  -1   30.46    1.57
  -8   5   1   31.62    1.67
  -8   5   1   35.88    1.81
  -8   5   1   31.28    1.61
   7  -5  -1   28.69    1.49
   7  -5  -1   27.00    1.56
   7  -5  -1   27.88    1.44
   7  -5  -1   24.49    1.29
  -7   5   1   27.74    1.43
  -7   5   1   28.08    1.50
  -7   5   1   25.33    1.34
   6  -5  -1   12.23    0.87
   6  -5  -1   10.83    0.87
   6  -5  -1    9.84    0.72
   6  -5  -1   11.26    0.92
  -6   5   1   10.60    0.74
  -6   5   1   10.53    0.85
  -6   5   1   10.90    0.92
   5  -5  -1   24.21    1.17
   5  -5  -1   27.05    1.36
   5  -5  -1   26.23    1.29
   5  -5  -1   25.95    1.28
  -5   5   1   27.14    1.31
  -5   5   1   25.91    1.22
  -5   5   1   25.33    1.26
   4  -5  -1   18.22    1.03
   4  -5  -1   18.80    1.00
   4  -5  -1   16.41    0.88
   4  -5  -1   19.30    0.99
  -4   5   1   17.36    0.97
  -4   5   1   19.22    1.02
  -4   5   1   17.18    0.90
   3  -5  -1  143.92    5.56
   3  -5  -1  159.34    5.26
   3  -5  -1  155.21    5.38
   3  -5  -1  153.24    5.26
  -3   5   1  151.27    5.26
  -3   5   1  150.11    5.58
  -3   5   1  158.53    5.27
   2  -5  -1  239.25    8.94
   2  -5  -1  251.27    8.32
  -2   5   1  263.81    8.34
  -2   5   1  246.23    8.94
  -2   5   1  248.20    8.31
   1  -5  -1  179.15    6.09
   1  -5  -1  178.23    6.55
  -1   5   1  184.20    6.55
  -1   5   1  185.24    6.10
  -1   5   1  182.27    6.09
   0  -5  -1  119.88    4.21
   0  -5  -1  116.60    4.02
   0  -5  -1  118.77    4.34
   0   5   1  119.60    4.34
   0   5   1  119.57    4.03
  -1  -5  -1   31.86    1.29
  -1  -5  -1   29.93    1.18
  -1  -5  -1   31.91    1.30
   1   5   1   32.70    1.20
   1   5   1   30.82    1.28
  -2  -5  -1   57.58    2.15
  -2  -5  -1   57.83    2.02
   2   5   1   55.72    2.14
   2   5   1   60.72    2.02
  -3  -5  -1   17.76    0.71
  -3  -5  -1   17.01    0.70
  -3  -5  -1   17.56    0.80
   3   5   1   15.65    0.69
   3   5   1   14.16    0.77
  -4  -5  -1   34.45    1.44
  -4  -5  -1   36.48    1.36
  -4  -5  -1   33.65    1.40
  -4  -5  -1   35.81    1.35
   4   5   1   36.25    1.42
   4   5   1   39.59    1.36
   4   5   1   38.14    1.46
   4   5   1   38.40    1.36
  -5  -5  -1  102.37    3.39
  -5  -5  -1  103.17    3.54
  -5  -5  -1   95.26    3.46
  -5  -5  -1   96.95    3.37
   5   5   1   95.35    3.52
   5   5   1  100.39    3.38
   5   5   1   94.97    3.47
   5   5   1   99.96    3.38
  -6  -5  -1   27.67    1.18
  -6  -5  -1   28.37    1.19
  -6  -5  -1   26.43    1.23
  -6  -5  -1   27.83    1.24
   6   5   1   30.90    1.19
   6   5   1   31.26    1.21
   6   5   1   30.45    1.26
   6   5   1   28.96    1.25
  -7  -5  -1  116.48    4.11
  -7  -5  -1  114.20    3.95
  -7  -5  -1  110.03    4.04
  -7  -5  -1  116.20    3.96
   7   5   1  114.04    3.96
   7   5   1  108.92    4.03
   7   5   1  111.58    4.09
   7   5   1  117.10    3.95
  -8  -5  -1   30.40    1.40
  -8  -5  -1   31.50    1.44
  -8  -5  -1   29.97    1.42
  -8  -5  -1   32.32    1.42
   8   5   1   34.73    1.42
   8   5   1   32.79    1.42
   8   5   1   32.71    1.46
   8   5   1   33.20    1.46
  -9  -5  -1   23.48    1.23
  -9  -5  -1   23.58    1.25
  -9  -5  -1   22.39    1.19
  -9  -5  -1   23.74    1.19
   9   5   1   24.98    1.26
   9   5   1   23.73    1.24
   9   5   1   24.24    1.20
   9   5   1   25.03    1.26
 -10  -5  -1   27.34    1.38
 -10  -5  -1   25.87    1.39
 -10  -5  -1   26.77    1.35
 -10  -5  -1   27.28    1.34
  10   5   1   27.14    1.38
  10   5   1   24.83    1.35
  10   5   1   26.16    1.40
  10   5   1   26.67    1.34
 -11  -5  -1   27.83    1.48
 -11  -5  -1   30.05    1.50
 -11  -5  -1   29.47    1.54
 -11  -5  -1   30.66    1.50
  11   5   1   29.09    1.51
  11   5   1   30.37    1.58
  11   5   1   30.63    1.52
  11   5   1   30.92    1.48
 -12  -5  -1    0.37    0.46
 -12  -5  -1   -0.34    0.43
 -12  -5  -1    0.35    0.43
 -12  -5  -1    0.76    0.39
  12   5   1   -0.01    0.46
  12   5   1    0.27    0.52
  12   5   1    0.06    0.47
  12   5   1    0.58    0.45
 -13  -5  -1    2.36    0.71
 -13  -5  -1    3.04    0.68
 -13  -5  -1    3.90    0.67
 -13  -5  -1    2.39    0.66
  13   5   1    2.76    0.66
  13   5   1    2.40    0.64
  13   5   1    2.84    0.75
  13   5   1    1.99    0.73
 -14  -5  -1   29.22    1.68
 -14  -5  -1   25.02    1.68
 -14  -5  -1   27.72    1.69
 -14  -5  -1   23.97    1.62
  14   5   1   28.04    1.80
  14   5   1   24.00    1.68
  14   5   1   23.75    1.69
  14   5   1   25.93    1.75
 -15  -5  -1   17.96    1.63
 -15  -5  -1   19.91    1.62
 -15  -5  -1   19.09    1.51
 -15  -5  -1   23.00    1.53
  15   5   1   22.23    1.74
  15   5   1   19.21    1.55
  15   5   1   19.34    1.62
  15   5   1   16.76    1.59
 -16  -5  -1    0.72    0.80
 -16  -5  -1   -0.64    0.67
 -16  -5  -1    0.81    0.90
 -16  -5  -1    1.37    0.69
  16   5   1    1.73    0.85
  16   5   1    1.72    0.98
  16   5   1    0.16    0.77
  16   5   1    0.45    0.80
 -17  -5  -1    2.46    0.98
 -17  -5  -1    3.35    1.19
 -17  -5  -1    2.30    1.07
 -17  -5  -1    2.96    0.93
  17   5   1    3.08    1.06
  17   5   1    3.18    1.01
  17   5   1    3.15    1.01
  17   5   1    4.18    1.24
 -18  -5  -1    1.73    1.27
 -18  -5  -1    0.21    0.88
 -18  -5  -1    0.47    1.01
 -18  -5  -1   -0.74    0.91
  18   5   1    0.08    1.11
  18   5   1   -0.10    1.05
  18   5   1   -0.56    1.11
  18   5   1   -1.22    1.02
 -19  -5  -1   -0.57    1.31
 -19  -5  -1   -0.41    1.15
 -19  -5  -1   -0.44    1.03
 -19  -5  -1    0.68    1.25
  19   5   1   -1.48    1.28
  19   5   1    0.15    1.24
  19   5   1   -0.70    1.20
  19   5   1   -0.33    1.31
 -20  -5  -1    0.50    1.28
 -20  -5  -1    0.76    1.15
 -20  -5  -1    2.47    1.33
 -20  -5  -1   -3.06    1.50
  20   5   1    3.61    1.54
  20   5   1    3.09    1.54
  20   5   1    0.06    1.38
 -21  -5  -1    0.15    1.89
 -21  -5  -1   -0.63    1.35
 -21  -5  -1    0.54    1.42
 -21  -5  -1    2.72    1.51
  21   5   1    0.88    1.69
  21   5   1    0.26    2.01
 -22  -5  -1    3.93    1.79
 -22  -5  -1    0.36    1.66
 -22  -5  -1   -1.64    2.22
 -22  -5  -1    1.86    1.64
  22   5   1   -3.08    2.28
  22   5   1    1.04    2.09
  16  -6  -1    0.63    1.41
  16  -6  -1    2.34    1.80
 -16   6   1   -0.84    1.66
 -16   6   1   -1.42    1.12
  15  -6  -1   -2.22    1.54
  15  -6  -1   -1.48    1.20
  15  -6  -1   -0.06    1.56
 -15   6   1   -1.79    1.24
 -15   6   1    0.27    1.11
 -15   6   1    0.75    1.52
  14  -6  -1    0.59    1.29
  14  -6  -1   -0.85    1.17
  14  -6  -1    0.05    1.04
 -14   6   1    0.30    1.24
 -14   6   1   -0.74    1.07
 -14   6   1    0.27    0.95
  13  -6  -1    1.08    1.23
  13  -6  -1    1.43    0.96
  13  -6  -1   -1.35    1.03
 -13   6   1    3.11    1.21
 -13   6   1    1.01    0.87
 -13   6   1    2.61    1.05
  12  -6  -1    1.43    0.95
  12  -6  -1    1.53    0.79
  12  -6  -1    0.29    1.04
 -12   6   1    1.64    1.01
 -12   6   1    1.11    0.87
 -12   6   1    0.94    0.77
  11  -6  -1    0.54    0.68
  11  -6  -1    0.58    0.84
  11  -6  -1    0.00    0.80
 -11   6   1    0.23    0.65
 -11   6   1    0.67    0.67
 -11   6   1    1.31    0.88
  10  -6  -1    4.64    0.88
  10  -6  -1    4.88    0.88
  10  -6  -1    6.79    0.89
  10  -6  -1    3.41    0.95
 -10   6   1    6.50    0.81
 -10   6   1    6.42    0.91
 -10   6   1    7.16    1.04
   9  -6  -1   22.08    1.51
   9  -6  -1   20.94    1.59
   9  -6  -1   23.46    1.36
   9  -6  -1   26.44    1.72
  -9   6   1   24.16    1.52
  -9   6   1   23.56    1.40
  -9   6   1   23.22    1.63
   8  -6  -1    0.18    0.56
   8  -6  -1    0.73    0.48
   8  -6  -1    0.88    0.66
   8  -6  -1    2.40    0.72
  -8   6   1    0.94    0.52
  -8   6   1    2.46    0.67
  -8   6   1    2.59    0.74
   7  -6  -1   16.63    1.05
   7  -6  -1   17.62    1.27
   7  -6  -1   19.58    1.22
   7  -6  -1   16.58    1.33
  -7   6   1   18.41    1.23
  -7   6   1   21.22    1.35
  -7   6   1   16.30    1.09
   6  -6  -1    6.79    0.68
   6  -6  -1    8.30    0.79
   6  -6  -1    7.30    0.94
   6  -6  -1    8.10    0.86
  -6   6   1    7.28    0.71
  -6   6   1    7.40    0.81
  -6   6   1   10.02    0.93
   5  -6  -1    7.43    0.75
   5  -6  -1    5.41    0.58
   5  -6  -1    6.68    0.69
   5  -6  -1    6.28    0.75
  -5   6   1    6.57    0.63
  -5   6   1    7.21    0.75
  -5   6   1    6.10    0.71
   4  -6  -1   20.66    1.15
   4  -6  -1   20.04    1.09
   4  -6  -1   17.58    0.97
  -4   6   1   19.49    1.02
  -4   6   1   19.13    1.08
  -4   6   1   22.76    1.16
   3  -6  -1   46.44    1.95
   3  -6  -1   46.61    1.87
   3  -6  -1   42.72    1.86
  -3   6   1   48.66    1.89
  -3   6   1   45.62    1.88
  -3   6   1   47.08    1.87
   2  -6  -1  146.08    4.99
   2  -6  -1  144.10    5.30
  -2   6   1  146.86    4.99
  -2   6   1  144.51    5.31
  -2   6   1  142.44    4.97
   1  -6  -1  203.80    7.28
   1  -6  -1  195.85    7.02
   1  -6  -1  199.55    6.75
  -1   6   1  201.97    6.75
  -1   6   1  204.38    6.76
  -1   6   1  201.39    7.27
   0  -6  -1  132.13    4.46
   0  -6  -1  131.07    4.81
   0  -6  -1  128.59    4.66
   0   6   1  129.83    4.80
   0   6   1  133.17    4.46
  -1  -6  -1   89.74    3.30
  -1  -6  -1   88.65    3.13
  -1  -6  -1   89.55    3.40
   1   6   1   93.45    3.14
   1   6   1   92.96    3.31
  -2  -6  -1  151.68    5.09
  -2  -6  -1  150.74    5.34
   2   6   1  151.44    5.34
   2   6   1  155.86    5.10
  -3  -6  -1   88.48    3.24
  -3  -6  -1   88.31    3.06
   3   6   1   88.89    3.24
   3   6   1   92.32    3.07
  -4  -6  -1   22.93    1.04
  -4  -6  -1   22.52    0.93
  -4  -6  -1   22.27    1.00
  -4  -6  -1   23.90    0.95
   4   6   1   21.67    1.02
   4   6   1   23.31    0.94
  -5  -6  -1  117.00    3.96
  -5  -6  -1  113.97    3.95
  -5  -6  -1  114.74    4.15
  -5  -6  -1  113.40    4.06
   5   6   1  116.84    4.07
   5   6   1  120.40    3.96
   5   6   1  118.35    3.96
   5   6   1  114.68    4.15
  -6  -6  -1  220.37    7.38
  -6  -6  -1  221.44    7.39
  -6  -6  -1  220.94    7.69
  -6  -6  -1  214.00    7.53
   6   6   1  230.06    7.39
   6   6   1  219.89    7.54
   6   6   1  226.54    7.40
   6   6   1  219.58    7.68
  -7  -6  -1   18.01    0.97
  -7  -6  -1   15.49    0.94
  -7  -6  -1   17.85    0.88
  -7  -6  -1   19.70    0.91
   7   6   1   16.66    0.96
   7   6   1   19.92    0.92
   7   6   1   18.28    0.90
   7   6   1   17.48    0.96
  -8  -6  -1   57.97    2.27
  -8  -6  -1   58.06    2.35
  -8  -6  -1   62.41    2.31
  -8  -6  -1   61.19    2.38
   8   6   1   58.92    2.35
   8   6   1   58.68    2.29
   8   6   1   61.03    2.38
   8   6   1   61.99    2.30
  -9  -6  -1   64.59    2.51
  -9  -6  -1   65.41    2.63
  -9  -6  -1   66.62    2.53
  -9  -6  -1   65.56    2.60
   9   6   1   65.51    2.54
   9   6   1   69.05    2.62
   9   6   1   65.15    2.53
   9   6   1   66.20    2.62
 -10  -6  -1   62.39    2.44
 -10  -6  -1   60.88    2.46
 -10  -6  -1   60.71    2.54
 -10  -6  -1   65.94    2.54
  10   6   1   60.15    2.44
  10   6   1   61.65    2.55
  10   6   1   61.33    2.47
  10   6   1   63.40    2.54
 -11  -6  -1   74.56    2.96
 -11  -6  -1   71.53    2.87
 -11  -6  -1   74.58    2.96
 -11  -6  -1   74.70    2.88
  11   6   1   73.93    2.96
  11   6   1   74.16    2.88
  11   6   1   71.24    2.94
  11   6   1   72.27    2.89
 -12  -6  -1   17.72    1.14
 -12  -6  -1   15.73    1.15
 -12  -6  -1   16.16    1.11
  12   6   1   15.81    1.21
  12   6   1   17.39    1.20
  12   6   1   17.69    1.21
  12   6   1   18.95    1.19
 -13  -6  -1    5.37    0.73
 -13  -6  -1    4.72    0.81
 -13  -6  -1    6.40    0.91
 -13  -6  -1    6.93    0.89
  13   6   1    5.08    0.94
  13   6   1    5.82    0.83
  13   6   1    7.28    0.94
  13   6   1    6.75    0.89
 -14  -6  -1   12.30    1.35
 -14  -6  -1   17.29    1.37
 -14  -6  -1   14.01    1.42
 -14  -6  -1   21.78    1.50
  14   6   1   14.79    1.43
  14   6   1   16.23    1.46
  14   6   1   19.03    1.50
  14   6   1   20.91    1.48
 -15  -6  -1   14.46    1.48
 -15  -6  -1   11.62    1.44
 -15  -6  -1   14.43    1.33
 -15  -6  -1   14.12    1.31
  15   6   1   13.29    1.48
  15   6   1   12.66    1.49
  15   6   1   15.31    1.53
  15   6   1   12.66    1.42
 -16  -6  -1    0.61    0.70
 -16  -6  -1    0.23    0.71
 -16  -6  -1   -0.14    0.67
 -16  -6  -1   -1.40    0.78
  16   6   1    0.00    0.74
  16   6   1    0.64    0.84
  16   6   1   -0.46    0.83
  16   6   1    0.42    0.84
 -17  -6  -1    7.33    1.17
 -17  -6  -1   12.77    1.48
 -17  -6  -1    7.26    1.23
 -17  -6  -1   11.52    1.41
  17   6   1    8.94    1.28
  17   6   1    8.94    1.34
  17   6   1    9.53    1.30
  17   6   1    9.98    1.35
 -18  -6  -1    0.18    0.90
 -18  -6  -1    0.04    0.97
 -18  -6  -1   -1.06    0.98
 -18  -6  -1   -0.31    1.12
  18   6   1   -0.10    1.09
  18   6   1    2.58    1.14
  18   6   1    0.78    1.03
  18   6   1    1.90    1.01
 -19  -6  -1   -0.97    1.27
 -19  -6  -1    0.15    1.01
 -19  -6  -1   -1.53    0.94
 -19  -6  -1    0.17    1.09
  19   6   1   -0.92    1.21
  19   6   1   -0.19    1.27
  19   6   1    2.34    1.31
  19   6   1    1.50    1.28
 -20  -6  -1    3.46    1.47
 -20  -6  -1    6.18    1.49
 -20  -6  -1    3.52    1.65
 -20  -6  -1    2.42    1.25
  20   6   1    5.44    1.56
  20   6   1    3.11    1.41
  20   6   1    4.08    1.47
 -21  -6  -1    0.37    1.41
 -21  -6  -1    0.85    1.78
 -21  -6  -1    0.07    1.41
 -21  -6  -1    1.78    1.40
  21   6   1    0.27    1.89
  21   6   1    3.58    1.72
 -22  -6  -1   -1.17    1.60
 -22  -6  -1    3.64    2.07
 -22  -6  -1    3.76    1.74
 -22  -6  -1   -0.21    1.50
  22   6   1    1.48    1.94
  22   6   1   -1.54    2.23
  16  -7  -1    1.56    2.15
 -16   7   1    1.53    1.36
 -16   7   1    3.53    1.90
  15  -7  -1    2.20    1.80
 -15   7   1   -0.50    1.66
 -15   7   1    1.16    1.22
  14  -7  -1    0.47    1.47
  14  -7  -1   -0.09    1.30
 -14   7   1    0.36    1.42
 -14   7   1    1.61    1.14
 -14   7   1   -0.15    1.31
  13  -7  -1    4.45    1.32
  13  -7  -1    3.79    1.44
 -13   7   1    3.09    1.20
 -13   7   1    1.53    1.25
 -13   7   1    0.62    0.90
  12  -7  -1    7.18    1.20
  12  -7  -1    7.17    1.42
  12  -7  -1    6.43    1.37
 -12   7   1    5.61    1.11
 -12   7   1    6.89    1.02
 -12   7   1    6.83    1.31
  11  -7  -1    0.27    0.93
  11  -7  -1    0.10    0.58
  11  -7  -1    0.10    0.96
  11  -7  -1    0.79    0.73
 -11   7   1    0.19    0.68
 -11   7   1    2.53    0.98
 -11   7   1    0.76    0.74
  10  -7  -1    1.31    0.80
  10  -7  -1   -0.16    0.80
  10  -7  -1    1.02    0.67
  10  -7  -1    0.67    0.55
 -10   7   1    0.79    0.63
 -10   7   1    1.50    0.86
 -10   7   1    0.79    0.68
   9  -7  -1   16.51    1.52
   9  -7  -1   14.84    1.13
   9  -7  -1   13.71    1.30
   9  -7  -1   14.41    1.45
  -9   7   1   15.14    1.21
  -9   7   1   14.33    1.23
  -9   7   1   15.69    1.47
   8  -7  -1   -0.34    0.69
   8  -7  -1   -0.57    0.56
   8  -7  -1   -0.05    0.44
  -8   7   1    0.25    0.67
  -8   7   1   -0.47    0.48
  -8   7   1    0.02    0.54
   7  -7  -1   10.00    0.88
   7  -7  -1   11.63    1.20
   7  -7  -1    9.03    1.16
  -7   7   1   11.89    1.19
  -7   7   1   10.38    0.95
  -7   7   1    9.78    1.01
   6  -7  -1    8.08    0.94
   6  -7  -1    8.42    0.94
   6  -7  -1    6.88    0.73
  -6   7   1    8.03    0.90
  -6   7   1    7.09    0.78
  -6   7   1    8.56    0.99
   5  -7  -1    0.50    0.42
   5  -7  -1    0.47    0.32
   5  -7  -1    0.24    0.43
  -5   7   1    0.55    0.47
  -5   7   1    0.25    0.38
  -5   7   1    0.01    0.41
   4  -7  -1    3.86    0.60
   4  -7  -1    4.05    0.60
   4  -7  -1    3.26    0.45
  -4   7   1    3.99    0.58
  -4   7   1    3.41    0.55
  -4   7   1    3.95    0.49
   3  -7  -1   58.10    2.38
   3  -7  -1   56.71    2.27
   3  -7  -1   53.32    2.30
  -3   7   1   60.96    2.31
  -3   7   1   57.20    2.33
  -3   7   1   60.66    2.31
   2  -7  -1   74.69    2.88
   2  -7  -1   74.55    2.76
   2  -7  -1   74.98    2.88
  -2   7   1   73.16    2.77
  -2   7   1   75.39    2.88
  -2   7   1   72.17    2.75
   1  -7  -1   62.60    2.44
   1  -7  -1   60.65    2.32
   1  -7  -1   63.54    2.45
  -1   7   1   61.41    2.44
  -1   7   1   61.79    2.31
  -1   7   1   61.85    2.33
   0  -7  -1   62.02    2.45
   0  -7  -1   65.36    2.49
   0  -7  -1   62.41    2.32
   0   7   1   63.35    2.33
  -1  -7  -1   25.01    1.16
  -1  -7  -1   24.04    1.14
  -1  -7  -1   23.65    1.05
   1   7   1   25.20    1.17
   1   7   1   26.42    1.10
  -2  -7  -1  137.79    5.24
  -2  -7  -1  141.81    5.05
  -2  -7  -1  140.73    4.80
   2   7   1  142.31    5.05
   2   7   1  148.10    4.82
  -3  -7  -1  248.69    8.39
  -3  -7  -1  259.27    8.78
   3   7   1  244.26    8.76
   3   7   1  263.55    8.40
  -4  -7  -1   75.79    2.66
  -4  -7  -1   76.43    2.66
  -4  -7  -1   74.59    2.83
   4   7   1   77.25    2.67
   4   7   1   73.09    2.82
  -5  -7  -1  451.54   15.37
  -5  -7  -1  463.10   14.78
  -5  -7  -1  433.91   15.04
  -5  -7  -1  446.82   14.76
   5   7   1  468.70   14.78
   5   7   1  443.76   15.36
  -6  -7  -1  365.54   12.52
  -6  -7  -1  365.08   12.02
  -6  -7  -1  353.87   12.25
  -6  -7  -1  367.23   12.03
   6   7   1  361.03   12.51
   6   7   1  374.13   12.03
   6   7   1  369.18   12.27
   6   7   1  366.01   12.03
  -7  -7  -1   26.57    1.20
  -7  -7  -1   27.69    1.22
  -7  -7  -1   27.11    1.31
  -7  -7  -1   26.41    1.28
   7   7   1   27.34    1.30
   7   7   1   27.70    1.23
   7   7   1   27.63    1.29
   7   7   1   28.41    1.22
  -8  -7  -1    3.34    0.48
  -8  -7  -1    3.09    0.45
  -8  -7  -1    3.82    0.55
  -8  -7  -1    4.73    0.58
   8   7   1    3.53    0.50
   8   7   1    2.86    0.49
   8   7   1    3.25    0.50
   8   7   1    2.45    0.46
  -9  -7  -1    0.43    0.39
  -9  -7  -1    0.53    0.37
  -9  -7  -1    0.52    0.35
  -9  -7  -1    0.20    0.36
   9   7   1    0.68    0.41
   9   7   1    1.01    0.45
   9   7   1    0.72    0.44
   9   7   1    0.74    0.40
 -10  -7  -1   73.77    2.93
 -10  -7  -1   73.74    2.87
 -10  -7  -1   74.64    2.97
 -10  -7  -1   73.29    2.84
  10   7   1   74.08    2.88
  10   7   1   72.92    2.84
  10   7   1   77.23    2.95
  10   7   1   75.41    2.96
 -11  -7  -1   43.53    1.98
 -11  -7  -1   43.28    1.94
 -11  -7  -1   45.33    1.94
 -11  -7  -1   45.19    2.00
  11   7   1   43.96    1.96
  11   7   1   43.98    2.01
  11   7   1   43.08    1.95
  11   7   1   43.44    2.00
 -12  -7  -1   21.82    1.32
 -12  -7  -1   21.48    1.33
 -12  -7  -1   22.92    1.31
 -12  -7  -1   20.98    1.34
  12   7   1   21.82    1.36
  12   7   1   22.91    1.33
  12   7   1   23.77    1.38
  12   7   1   21.03    1.37
 -13  -7  -1    8.31    1.04
 -13  -7  -1    9.29    1.05
 -13  -7  -1    9.73    1.06
  13   7   1    8.63    0.97
  13   7   1    6.00    0.88
  13   7   1    9.82    1.02
  13   7   1    8.06    1.06
 -14  -7  -1   10.25    1.23
 -14  -7  -1   11.33    1.21
 -14  -7  -1    9.72    1.30
  14   7   1   11.04    1.31
[truncated: 4,527,022 more chars]
